# Supplementary material for: Subcortical Brain Volume, Regional Cortical Thickness, and Cortical Surface Area Across Disorders: Findings From the ENIGMA ADHD, ASD, and OCD Working Groups
Source: Atypon-hosted journal article supplement (doi:10.1176/appi.ajp.2020.19030331), 2020-06-16

|                    |                |
|--------------------|----------------|
| <b>Children</b>    | <b>page 1</b>  |
| <b>Adolescents</b> | <b>page 17</b> |
| <b>Adults</b>      | <b>page 33</b> |

# Crossdisorder: forestplots

## Forest plots Children

Forest plots are generated by running the standard regression model of each z-scored MRI feature  $x$  ( $y \sim x + \text{Age} + \text{Sex}$ ) again, for each site independently. Output are effect sizes and 95% confidence interval per feature.



[Children]

### Mean Thalamus ASD vs HC. (I2= 70.59 )

NIJMEGEN\_3  
BRC  
PITT  
FSM  
TORONTO  
MYAD  
FAIR  
ABIDE\_KKI  
ABIDE\_MAX\_MUN  
ABIDE\_NYU  
ABIDE\_OHSU  
ABIDE\_OLIN  
ABIDE\_PITT  
ABIDE\_SDSU  
ABIDE\_STANFORD  
ABIDE\_TCD  
ABIDE\_UM\_1  
ABIDE\_UM\_2  
ABIDE\_USM  
ABIDE\_YALE  
UMCU\_1  
UMCU\_2  
PHGGM  
ABIDEII-EMC\_1  
ABIDEII-GU\_1  
ABIDEII-IP\_1  
ABIDEII-KKI\_1  
ABIDEII-NYU\_1  
ABIDEII-NYU\_2  
ABIDEII-OHSU\_1  
ABIDEII-SDSU\_1  
ABIDEII-TCD\_1  
ABIDEII-UCLA\_1  
ABIDEII-USM\_1  
TORONTO  
SAOPAULO  
PITT  
Barcelona  
average

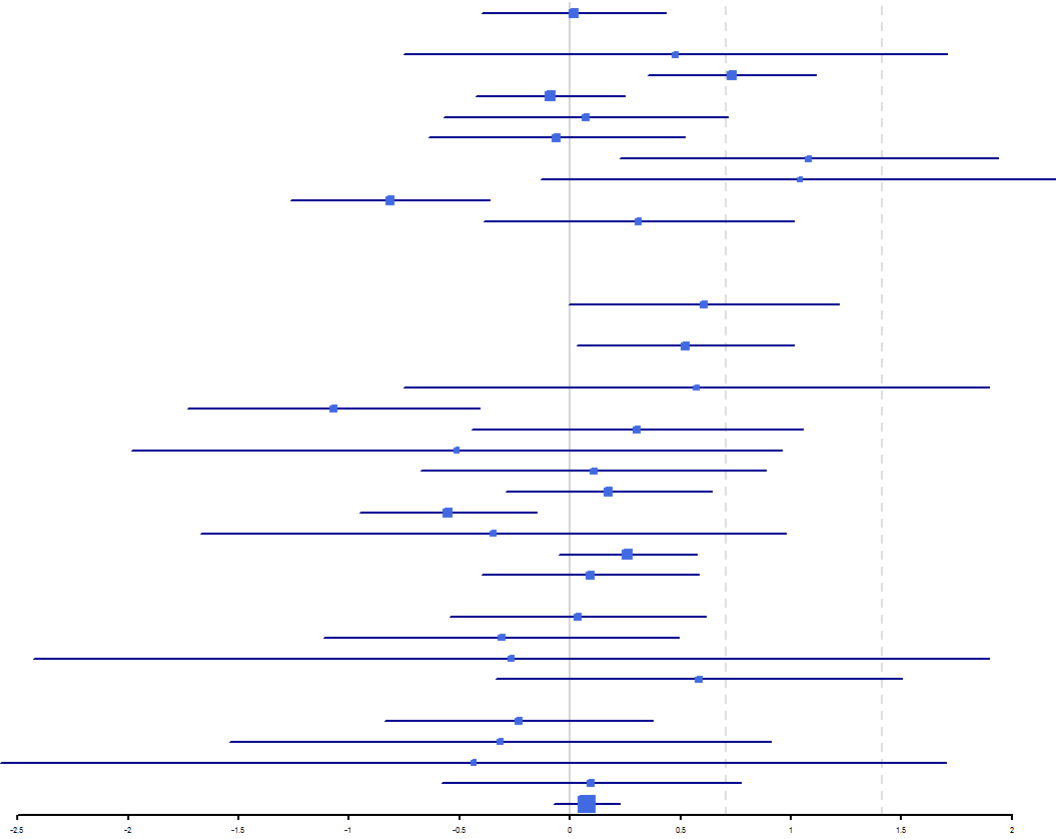

### Mean Putamen OCD vs HC. (I2= 14.07 )

Arnold  
Buitelaar  
Fitzgerald  
Gruner  
Hirano  
Hoexter  
Huyser  
Lazaro\_1  
Lazaro\_2  
Marsh  
Nurmi  
Reddy  
Soreni  
Stewart  
average

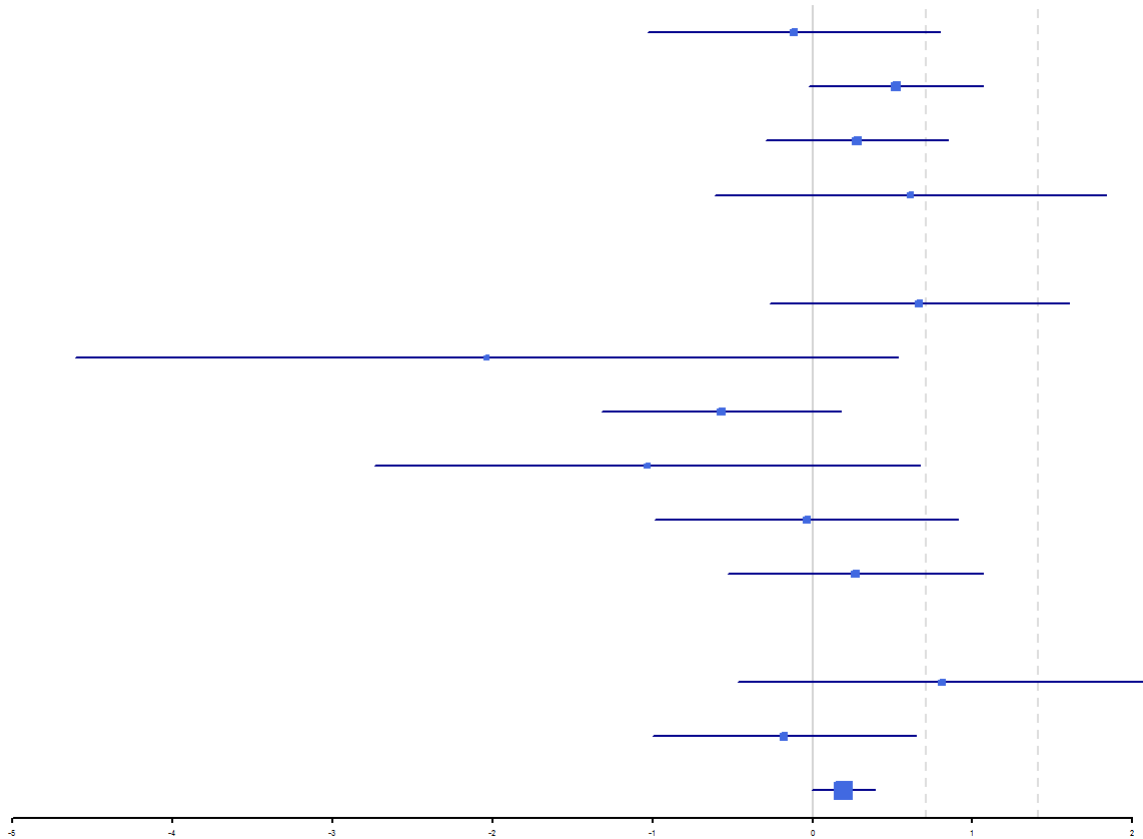

[Children]

### Mean Putamen ADHD vs HC. (I2= 64.87 )

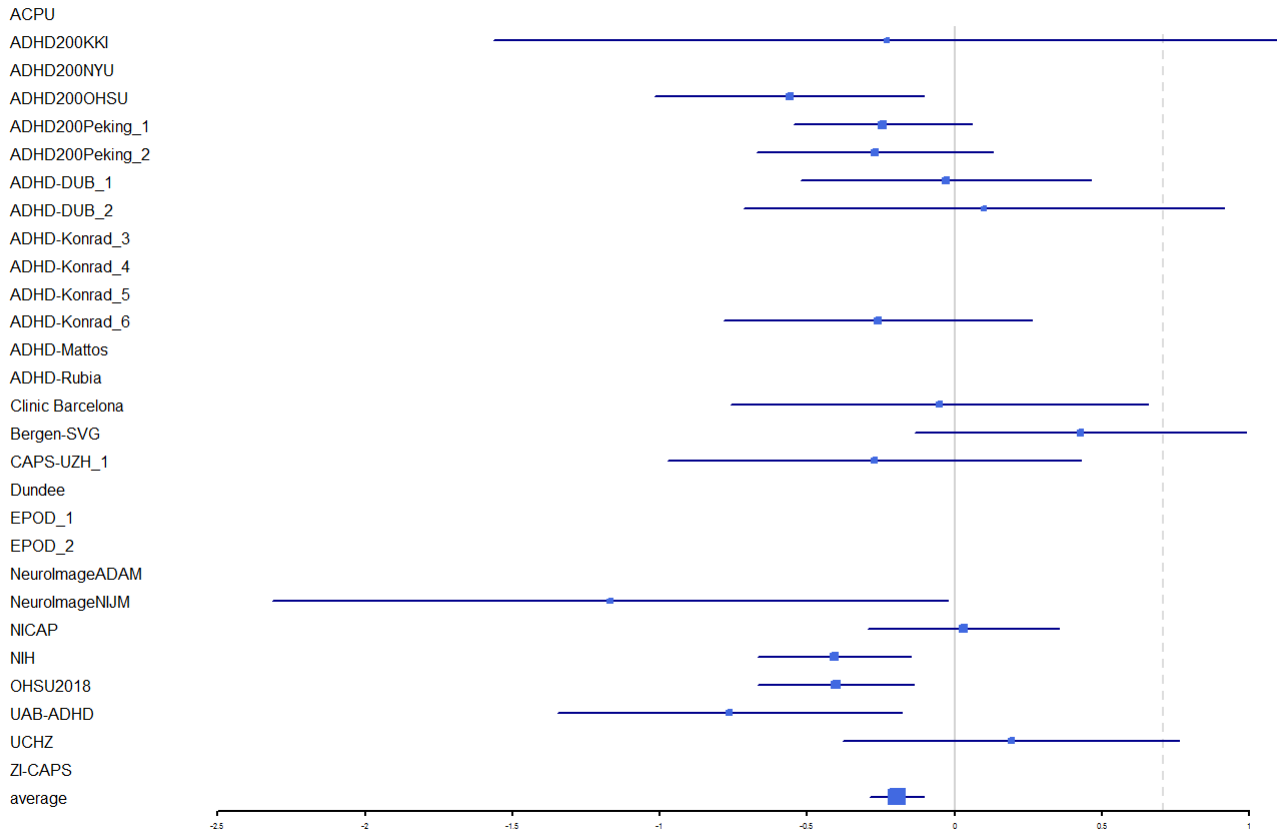

### Mean Putamen ASD vs HC. (I2= 64.87 )

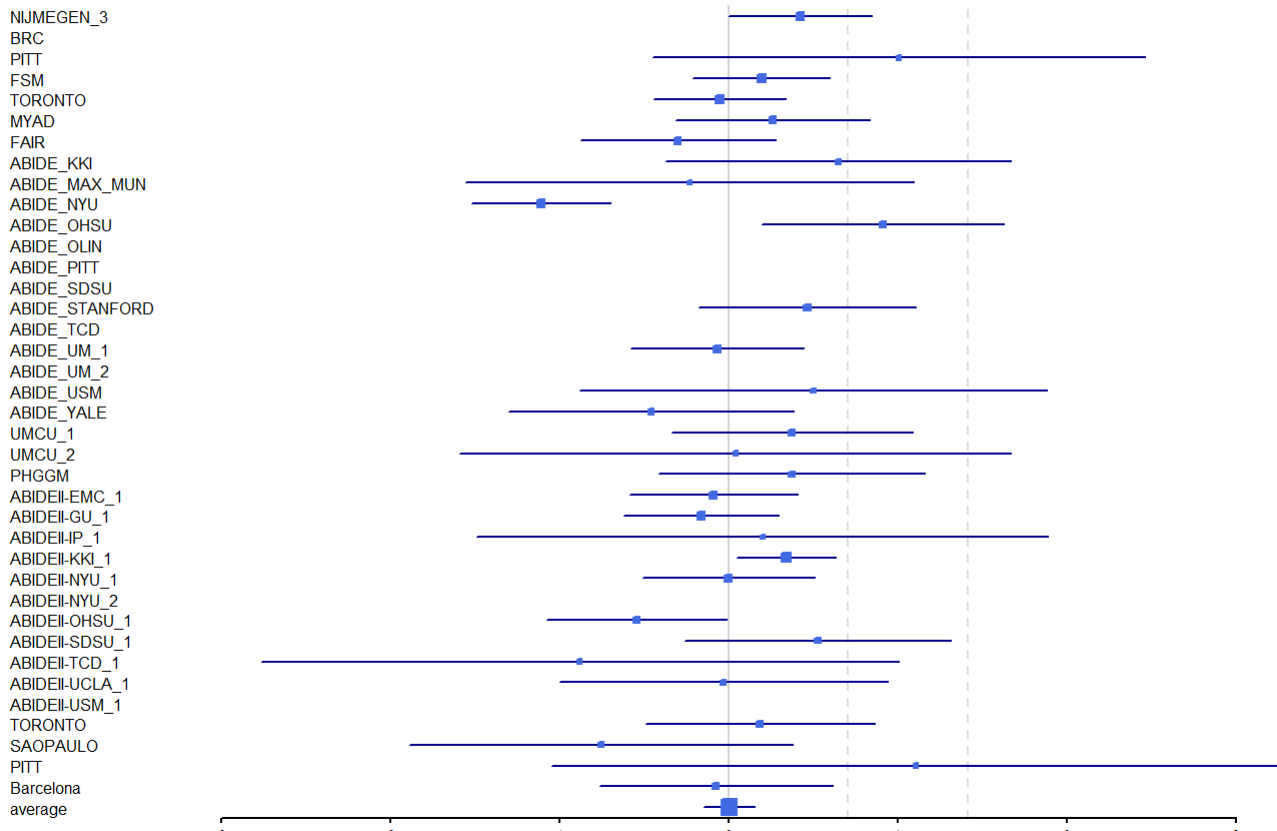

[Children]

### Mean Hippocampus OCD vs HC. (I2= 7.8 )

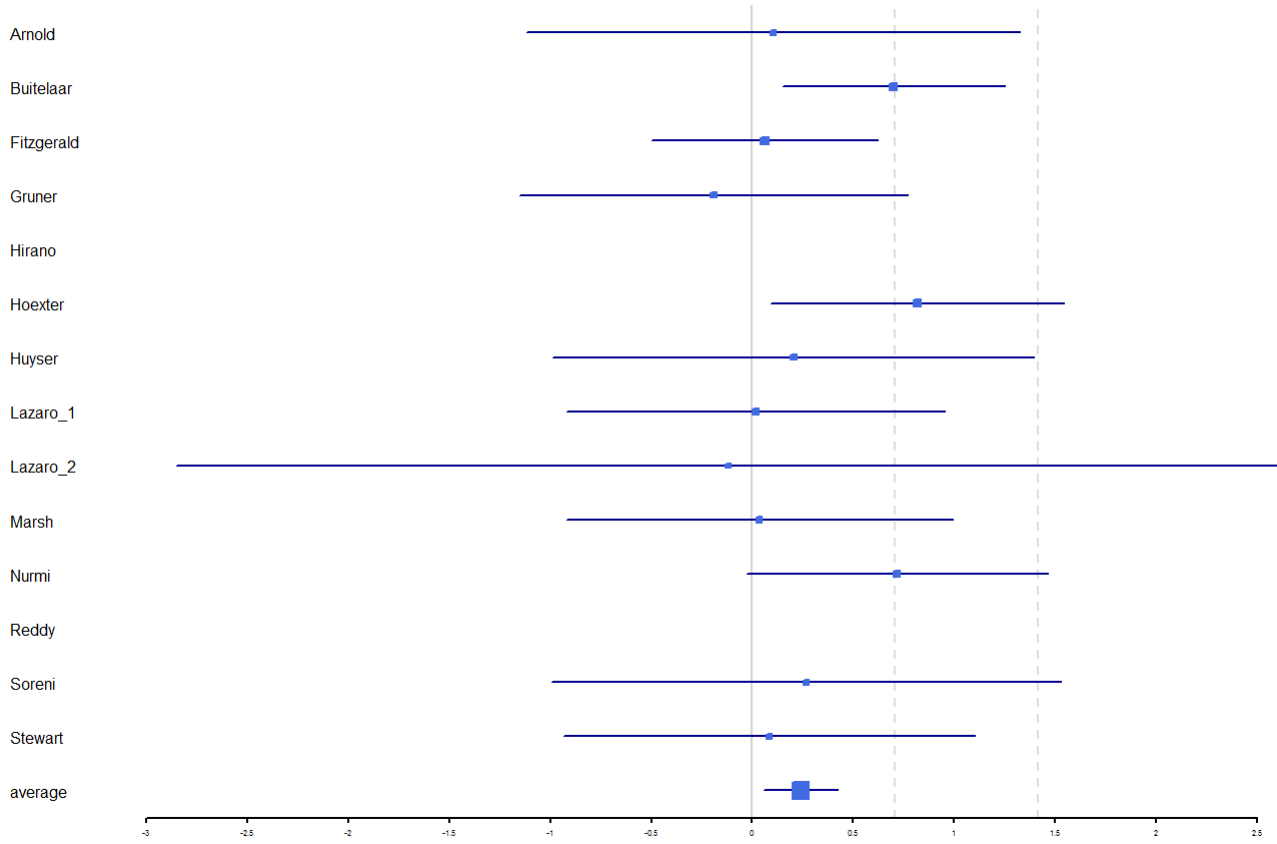

### Mean Hippocampus ADHD vs HC. (I2= 56.15 )

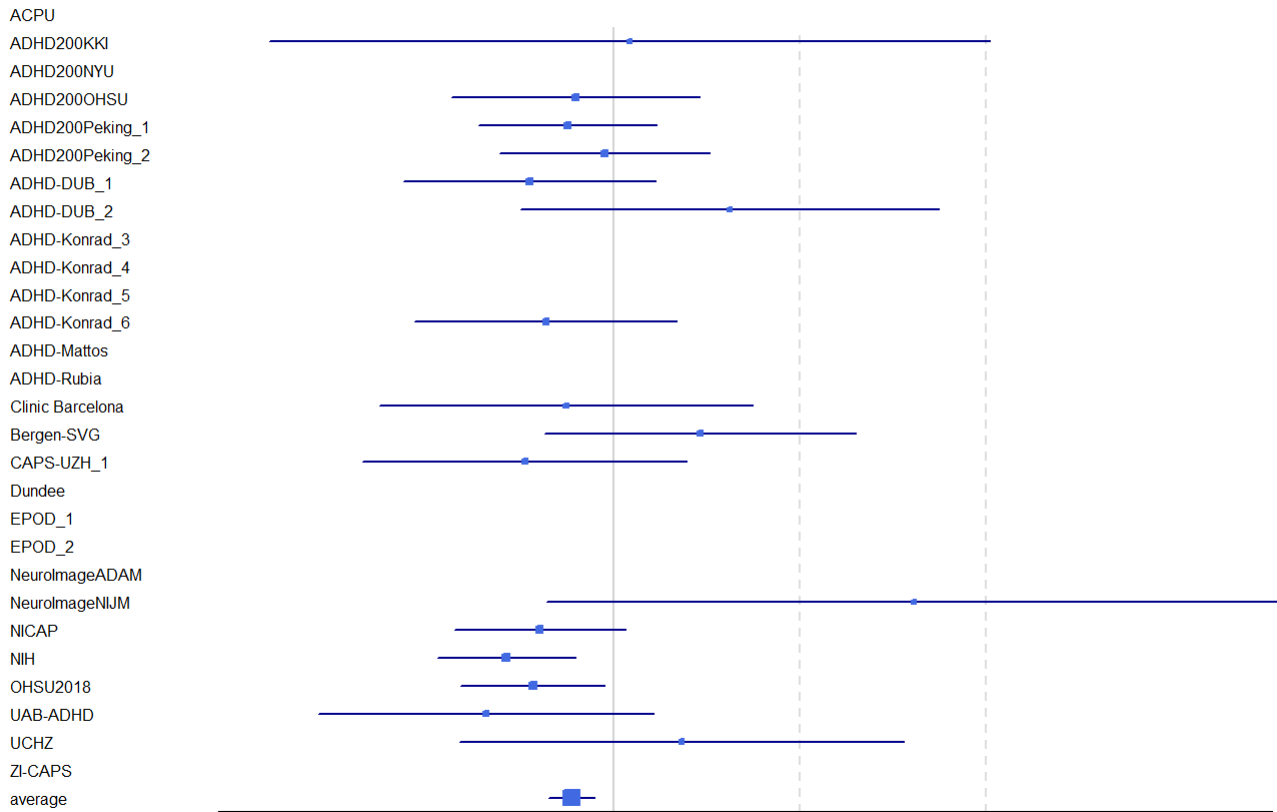

[Children]

### Mean Hippocampus ASD vs HC. (I2= 56.15 )

NIJMEGEN\_3  
BRC  
PITT  
FSM  
TORONTO  
MYAD  
FAIR  
ABIDE\_KKI  
ABIDE\_MAX\_MUN  
ABIDE\_NYU  
ABIDE\_OHSU  
ABIDE\_OLIN  
ABIDE\_PITT  
ABIDE\_SDSU  
ABIDE\_STANFORD  
ABIDE\_TCD  
ABIDE\_UM\_1  
ABIDE\_UM\_2  
ABIDE\_USM  
ABIDE\_YALE  
UMCU\_1  
UMCU\_2  
PHGGM  
ABIDEII-EMC\_1  
ABIDEII-GU\_1  
ABIDEII-IP\_1  
ABIDEII-KKI\_1  
ABIDEII-NYU\_1  
ABIDEII-NYU\_2  
ABIDEII-OHSU\_1  
ABIDEII-SDSU\_1  
ABIDEII-TCD\_1  
ABIDEII-UCLA\_1  
ABIDEII-USM\_1  
TORONTO  
SAOPAULO  
PITT  
Barcelona  
average

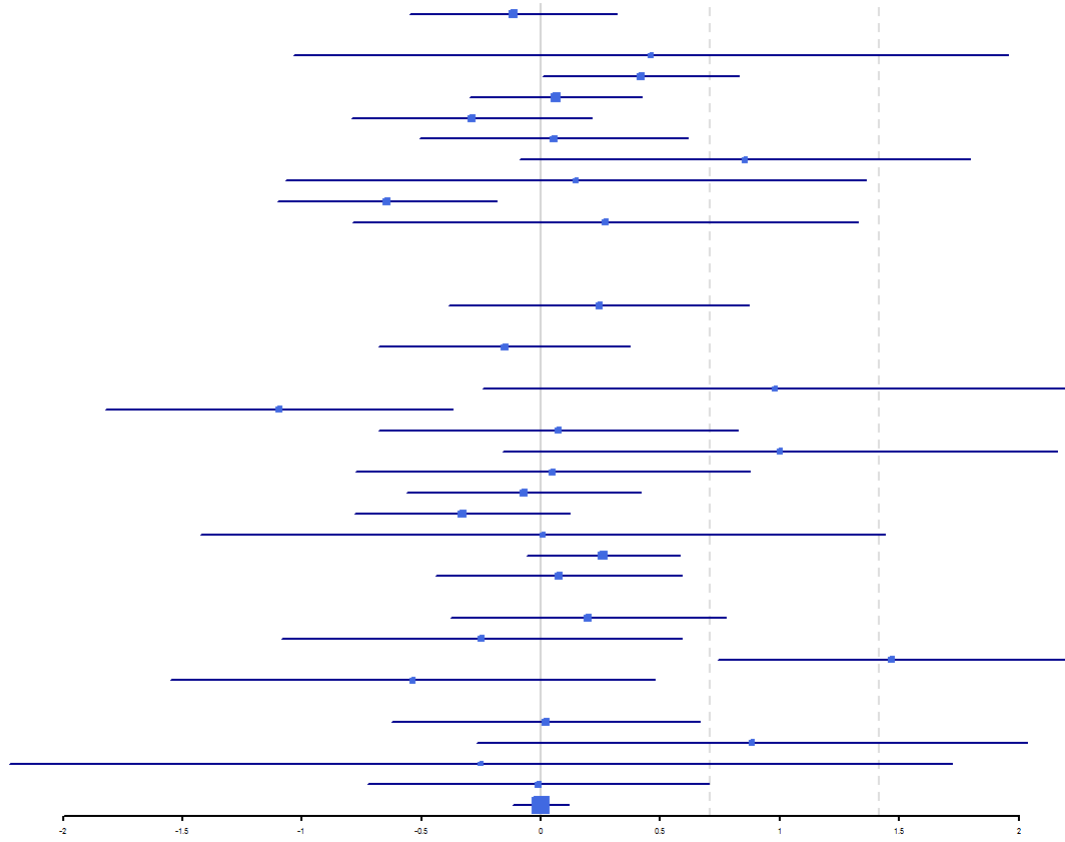

### Mean Amygdala OCD vs HC. (I2= 24.1 )

Arnold  
Buitelaar  
Fitzgerald  
Gruner  
Hirano  
Hoexter  
Huyser  
Lazaro\_1  
Lazaro\_2  
Marsh  
Nurmi  
Reddy  
Soreni  
Stewart  
average

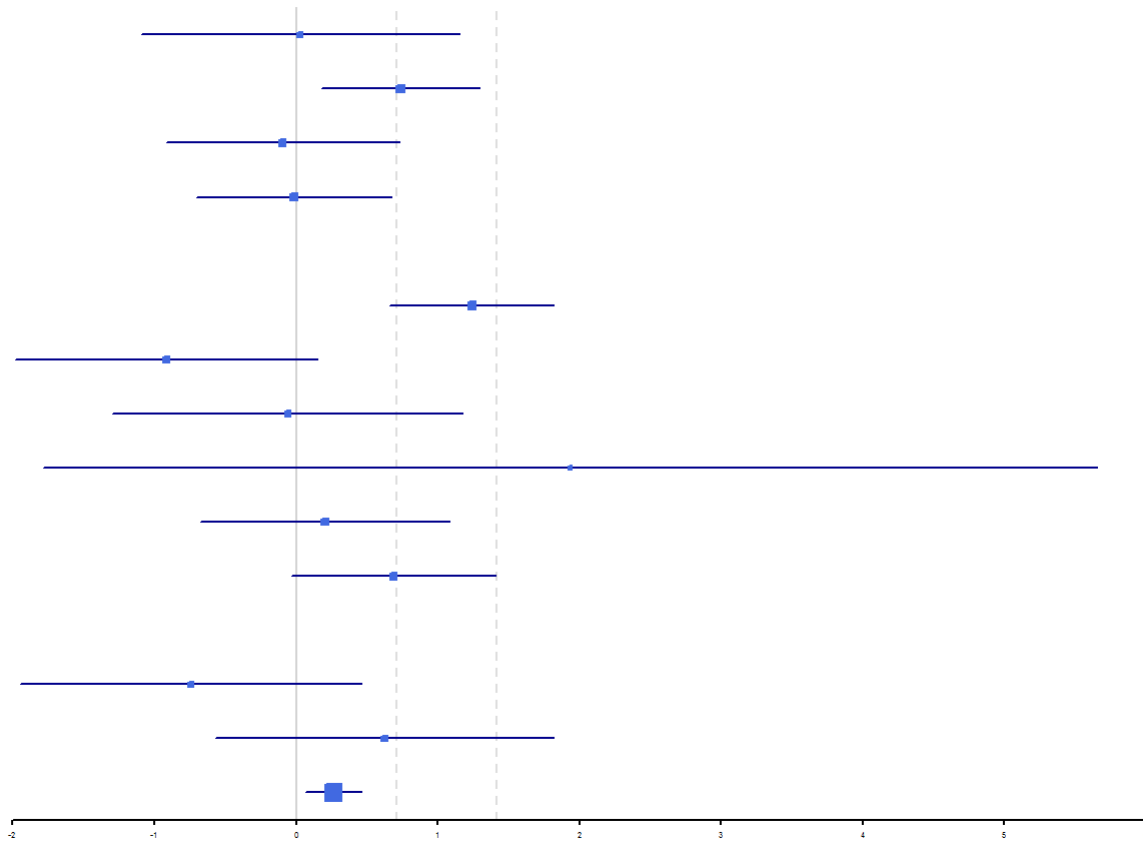

[Children]

### Mean Amygdala ADHD vs HC. (I2= 40.65 )

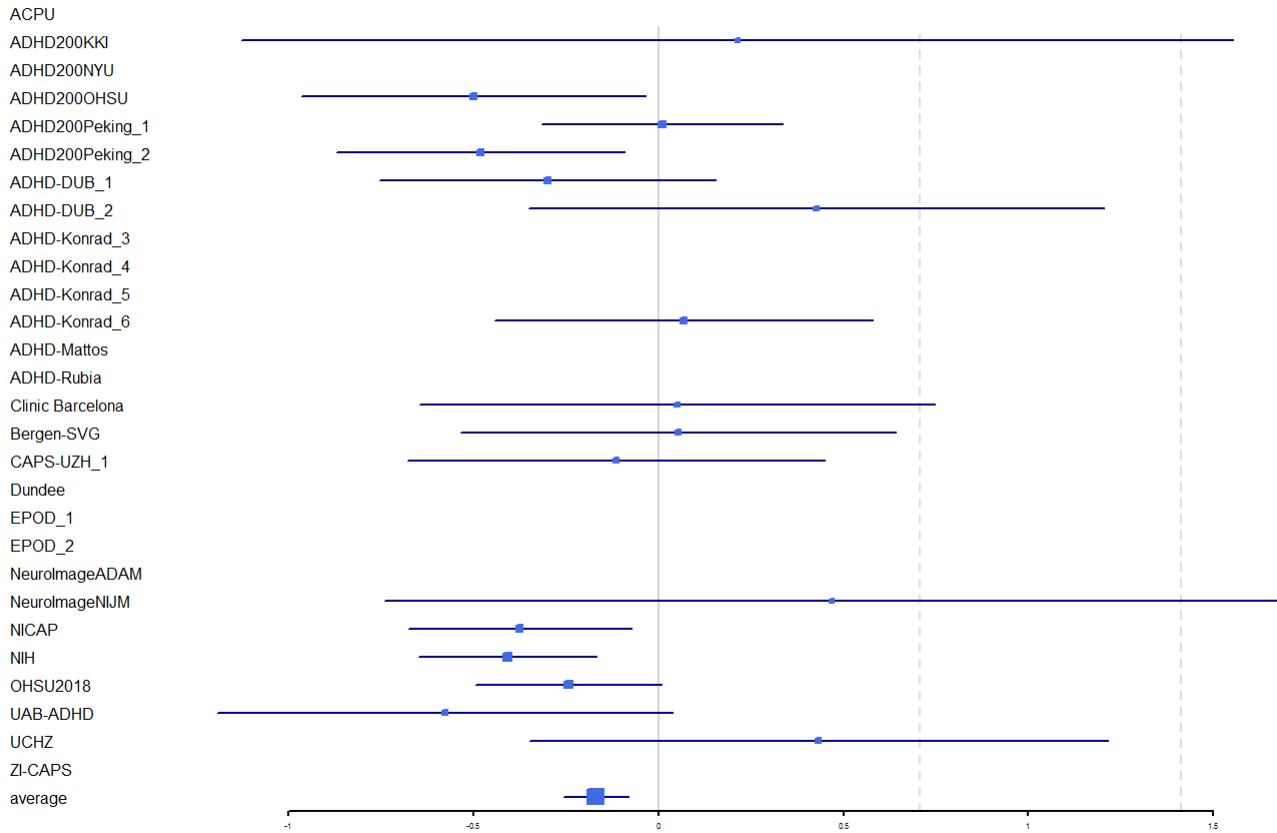

### Mean Amygdala ASD vs HC. (I2= 40.65 )

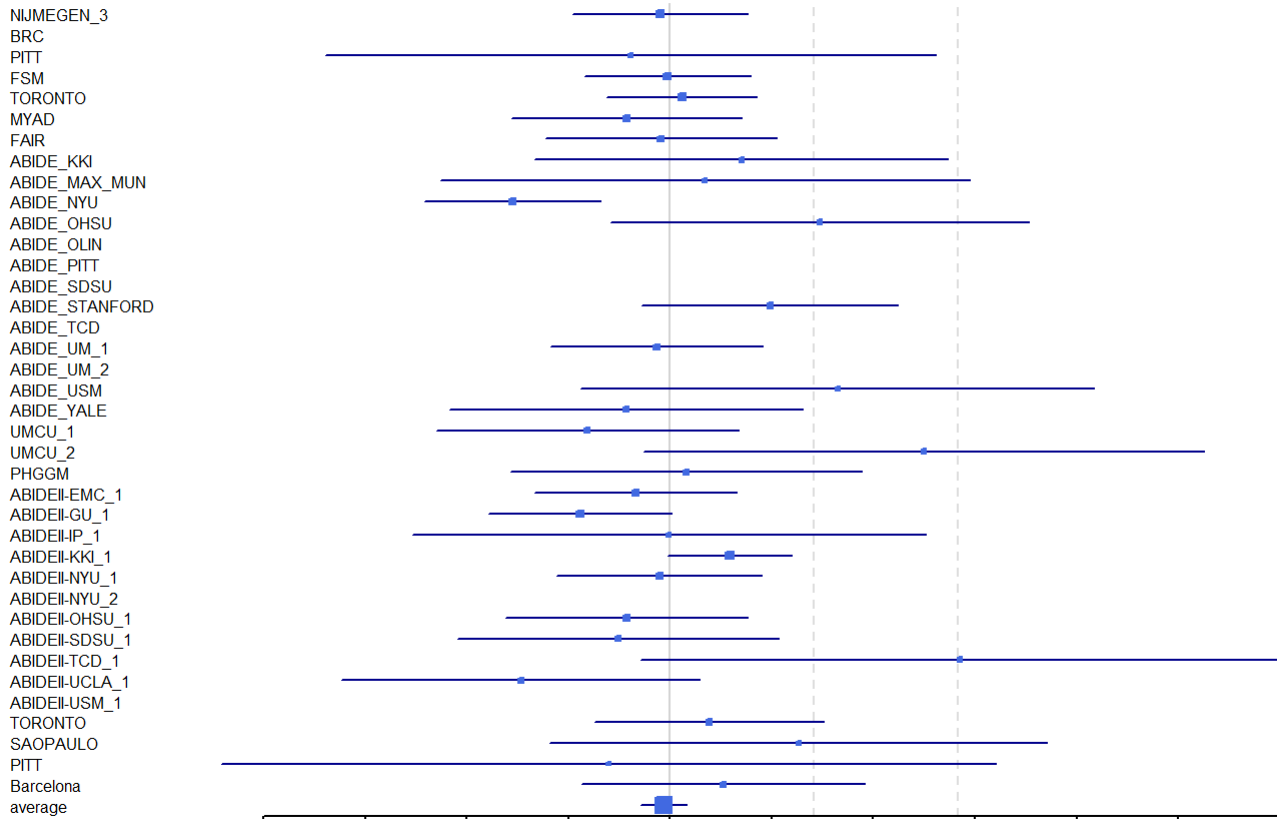

[Children]

### Mean Thickness Orbitofrontal OCD vs HC. (I2= 15.15 )

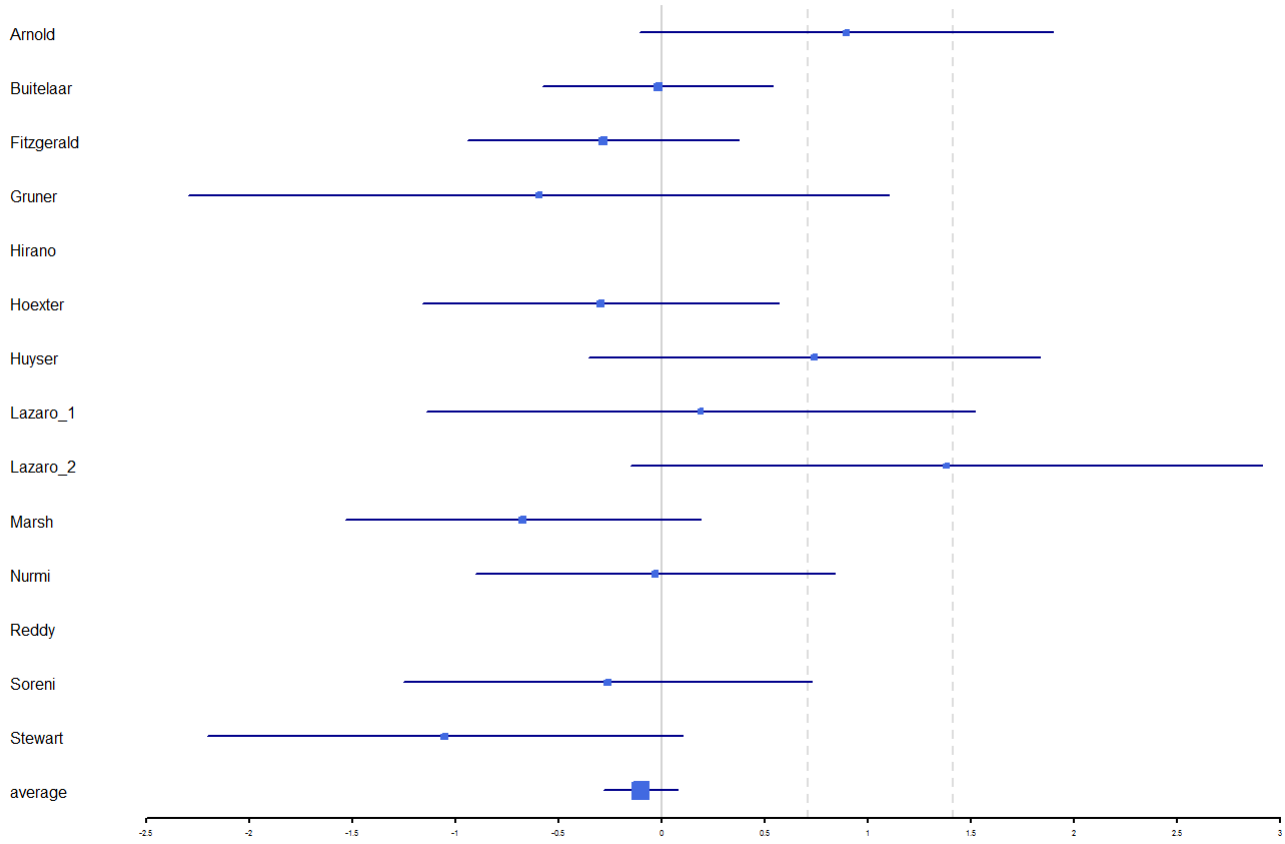

### Mean Thickness Orbitofrontal ADHD vs HC. (I2= 122.78 )

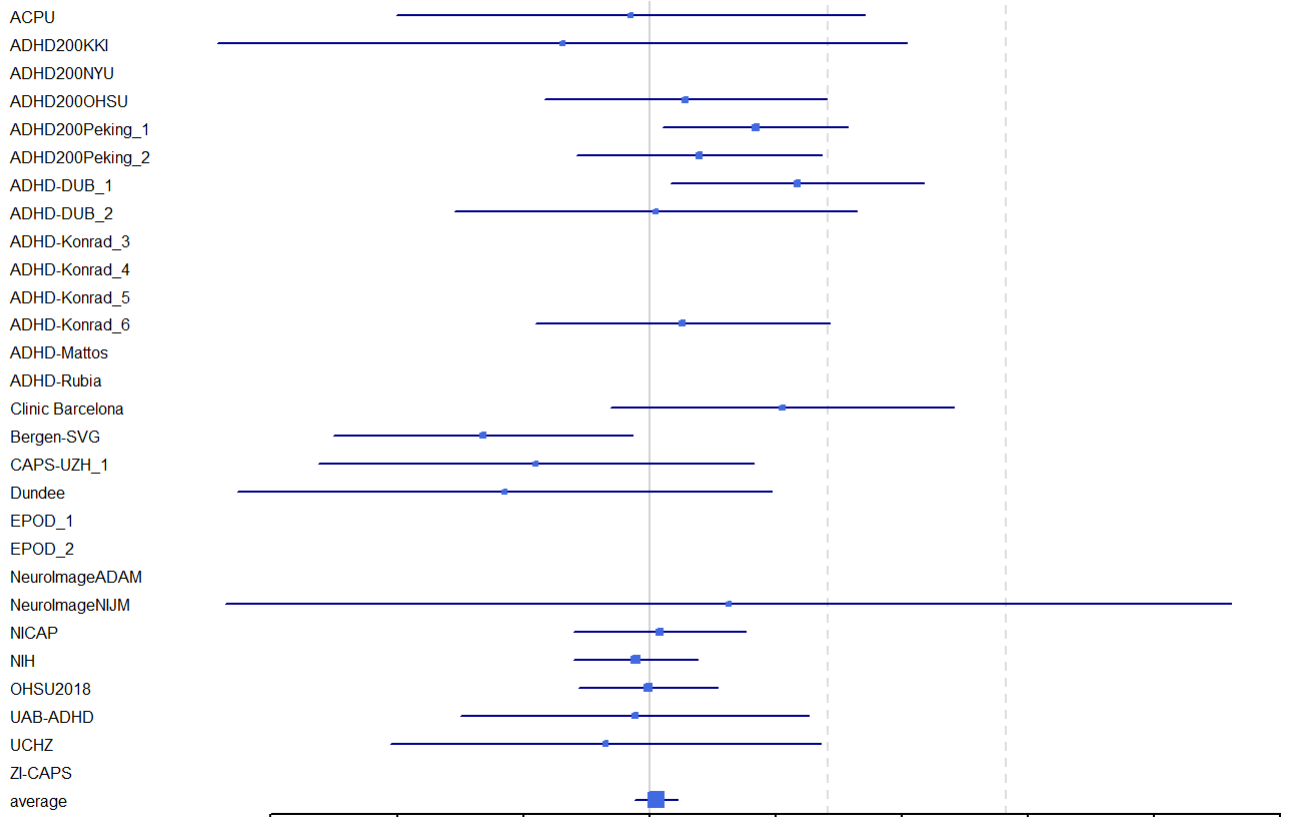



[Children]

### Mean Thickness Orbitofrontal ASD vs HC. (I2= 122.78 )

NIJMEGEN\_3  
BRC  
PITT  
FSM  
TORONTO  
MYAD  
FAIR  
ABIDE\_KKI  
ABIDE\_MAX\_MUN  
ABIDE\_NYU  
ABIDE\_OHSU  
ABIDE\_OLIN  
ABIDE\_PITT  
ABIDE\_SDSU  
ABIDE\_STANFORD  
ABIDE\_TCD  
ABIDE\_UM\_1  
ABIDE\_UM\_2  
ABIDE\_USM  
ABIDE\_YALE  
UMCU\_1  
UMCU\_2  
PHGGM  
ABIDEII-EMC\_1  
ABIDEII-GU\_1  
ABIDEII-IP\_1  
ABIDEII-KKI\_1  
ABIDEII-NYU\_1  
ABIDEII-NYU\_2  
ABIDEII-OHSU\_1  
ABIDEII-SDSU\_1  
ABIDEII-TCD\_1  
ABIDEII-UCLA\_1  
ABIDEII-USM\_1  
TORONTO  
SAOPAULO  
PITT  
Barcelona  
average

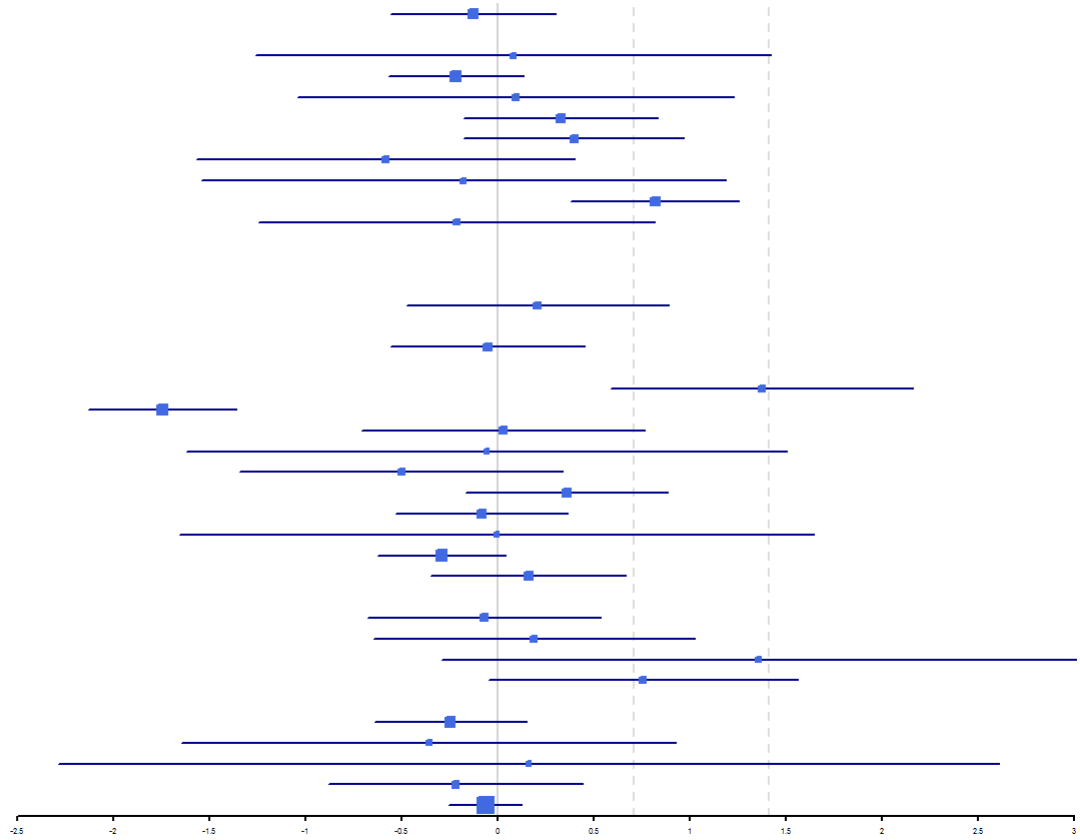

### Mean Thickness Pars Triangularis OCD vs HC. (I2= 18.56 )

Arnold  
Buitelaar  
Fitzgerald  
Gruner  
Hirano  
Hoexter  
Huysen  
Lazaro\_1  
Lazaro\_2  
Marsh  
Nurmi  
Reddy  
Soreni  
Stewart  
average

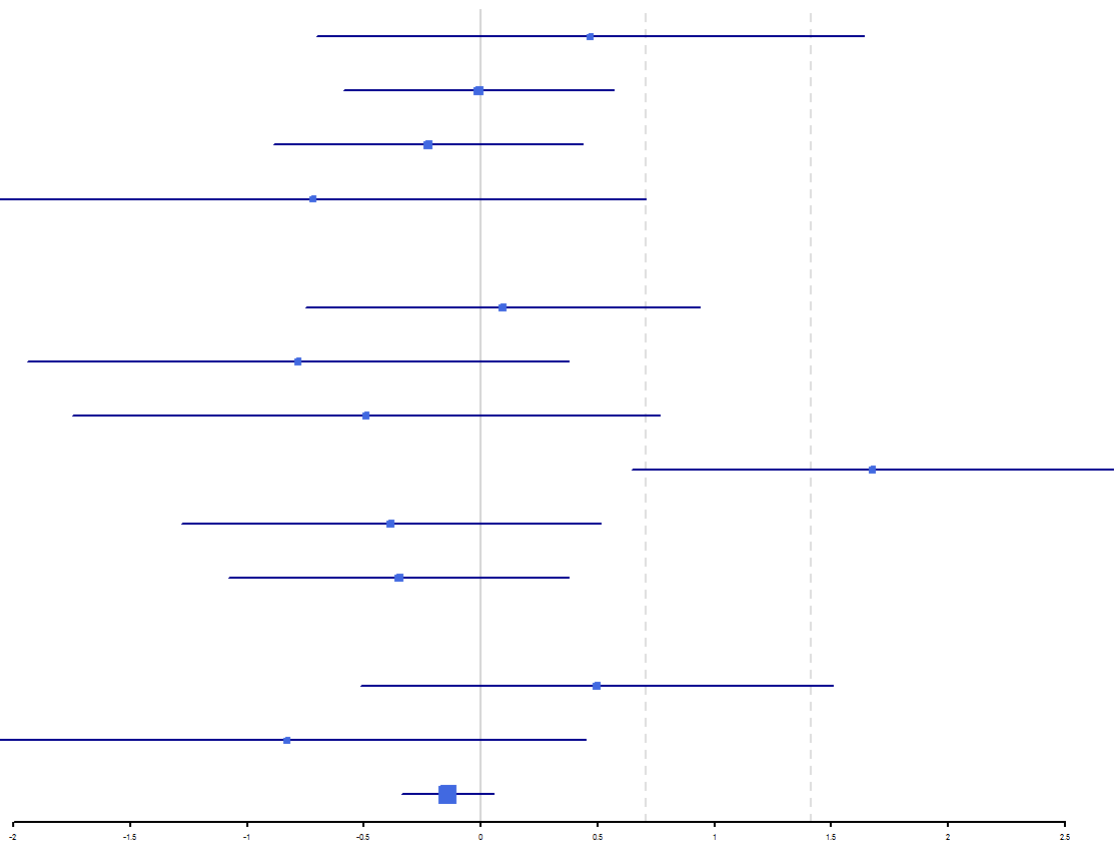

[Children]

### Mean Thickness Pars Triangularis ADHD vs HC. (I2= 86.01 )

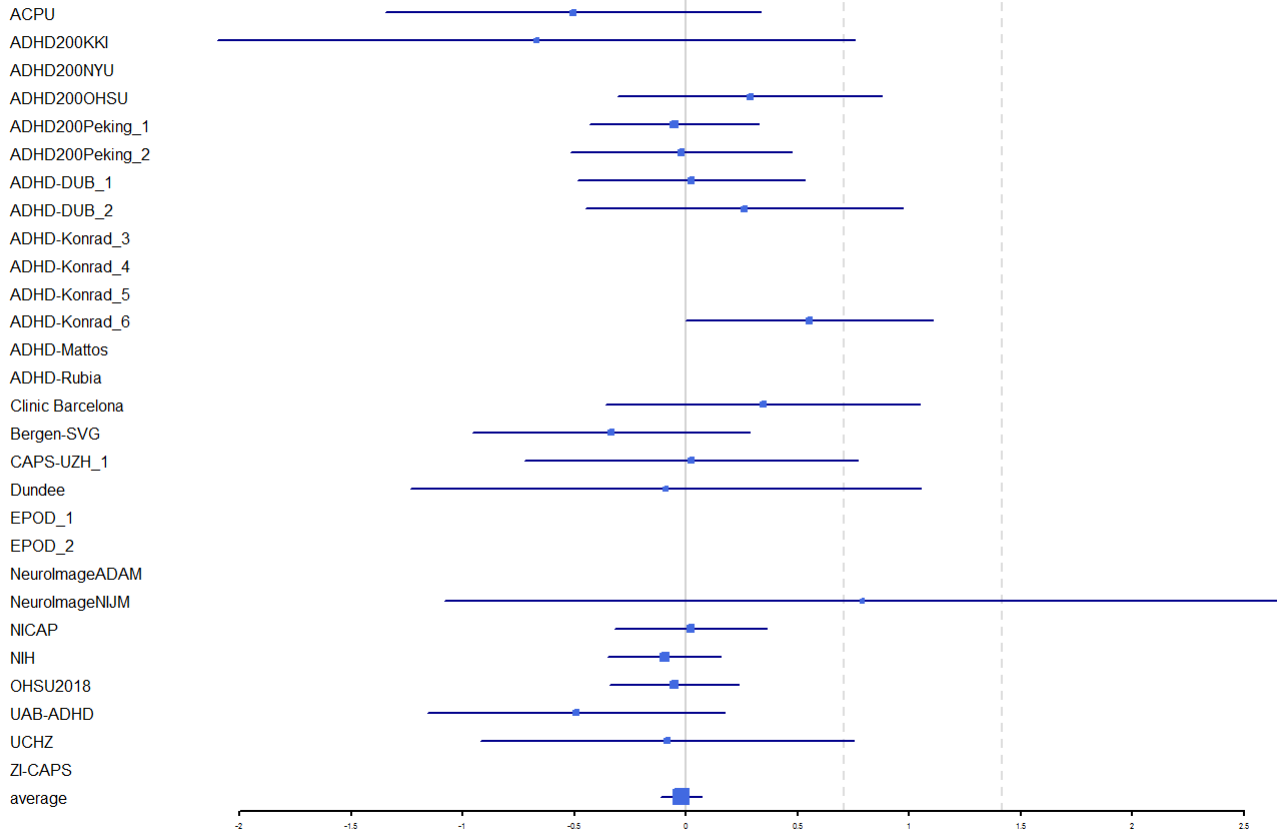

### Mean Thickness Pars Triangularis ASD vs HC. (I2= 86.01 )

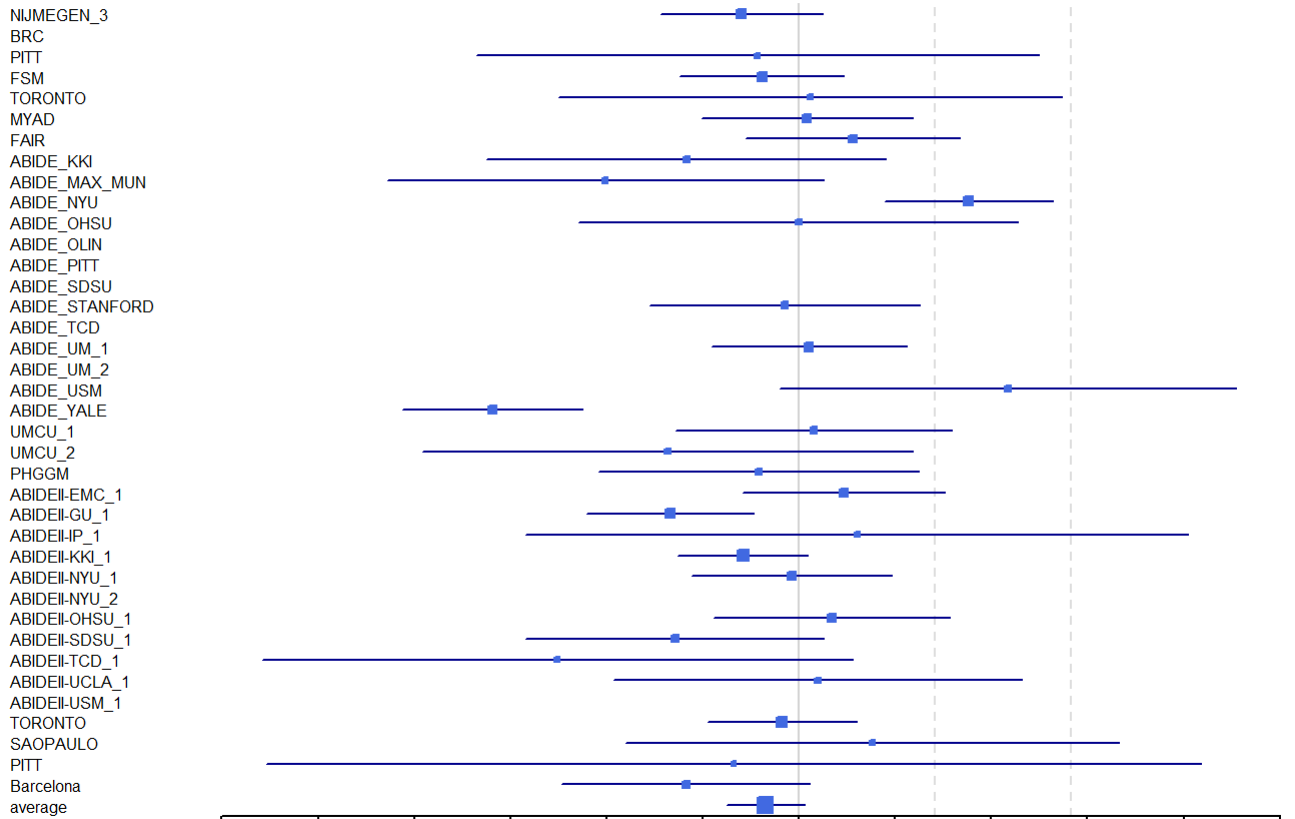

[Children]

### Mean Thickness Poserior Cingulate OCD vs HC. (I2= 30.94 )

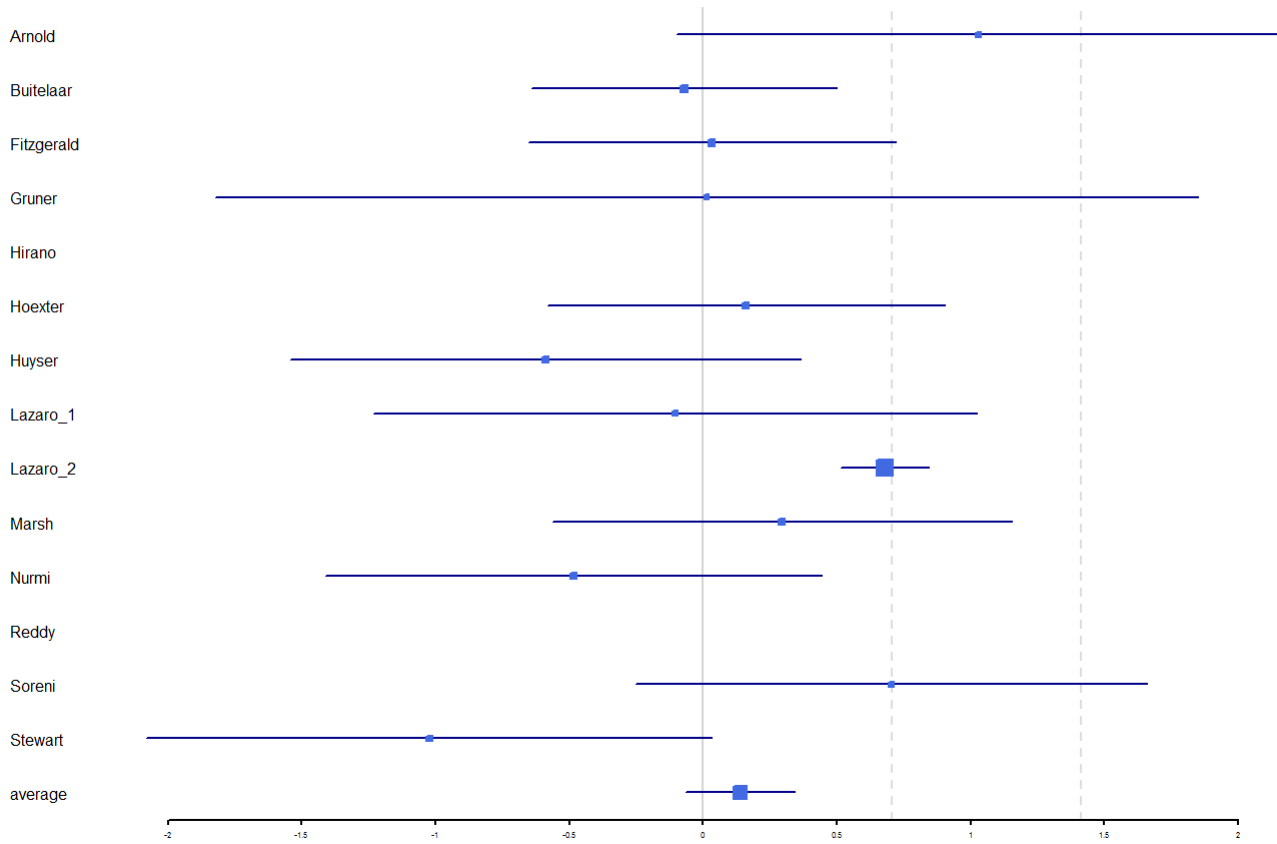

### Mean Thickness Poserior Cingulate ADHD vs HC. (I2= 64.18 )

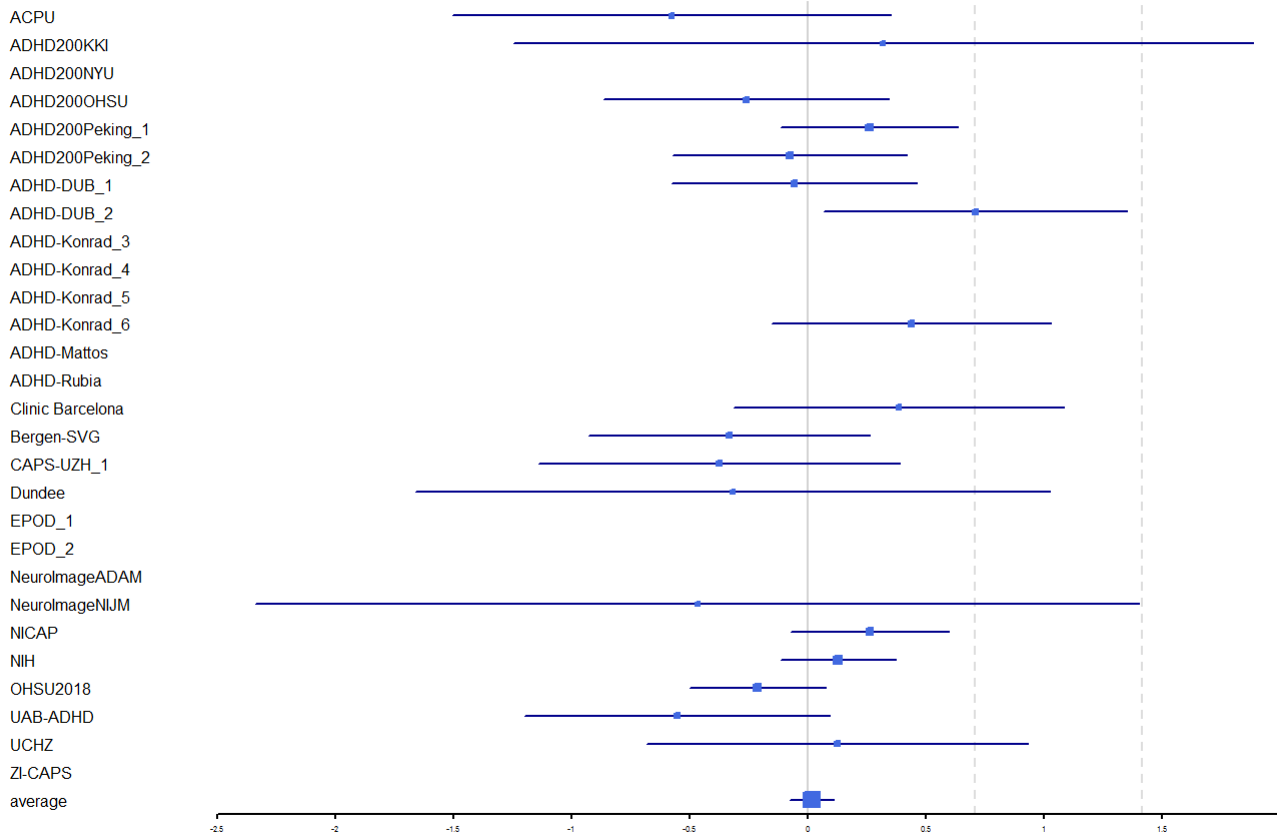

[Children]

### Mean Thickness Poserior Cingulate ASD vs HC. (I2= 64.18 )

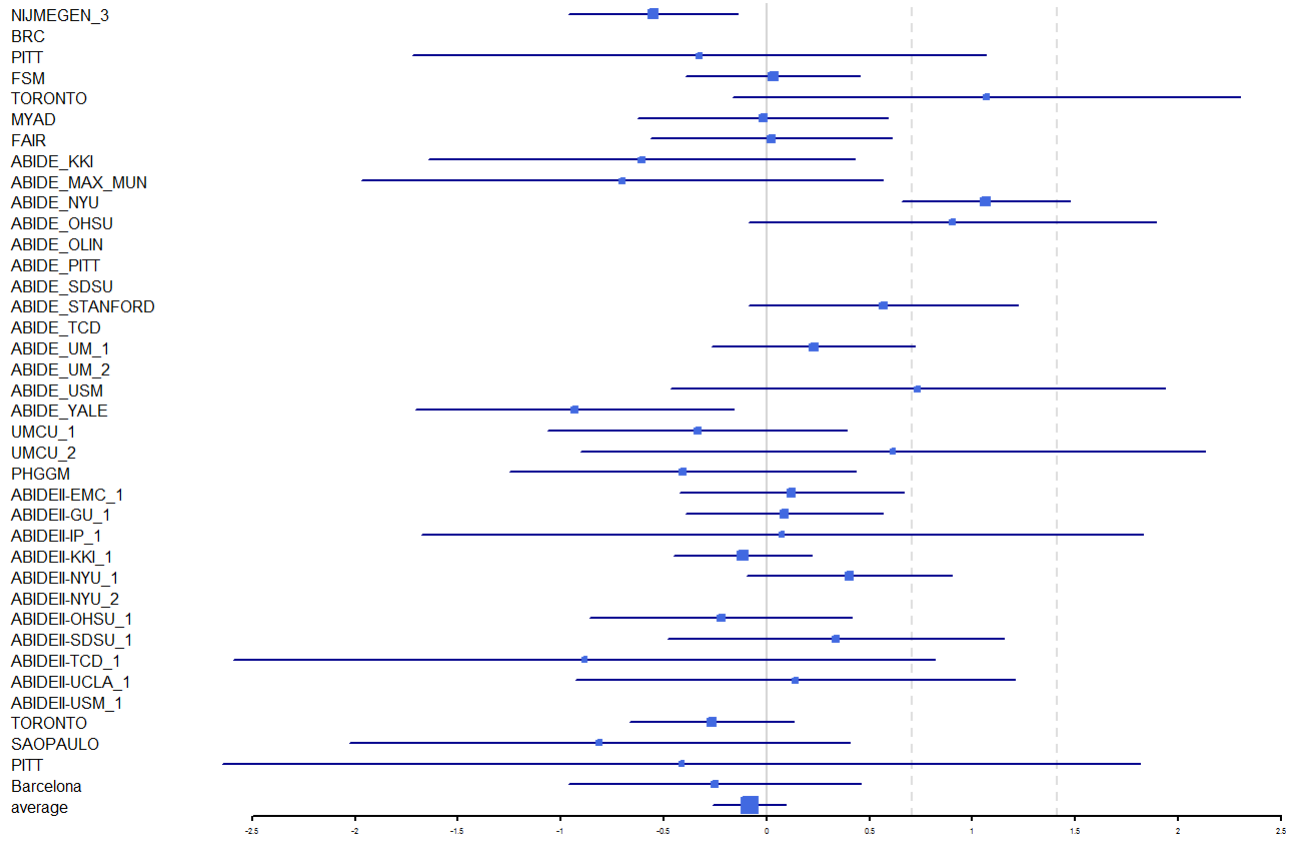

### Mean Cortical Thickness OCD vs HC. (I2= 11.59 )

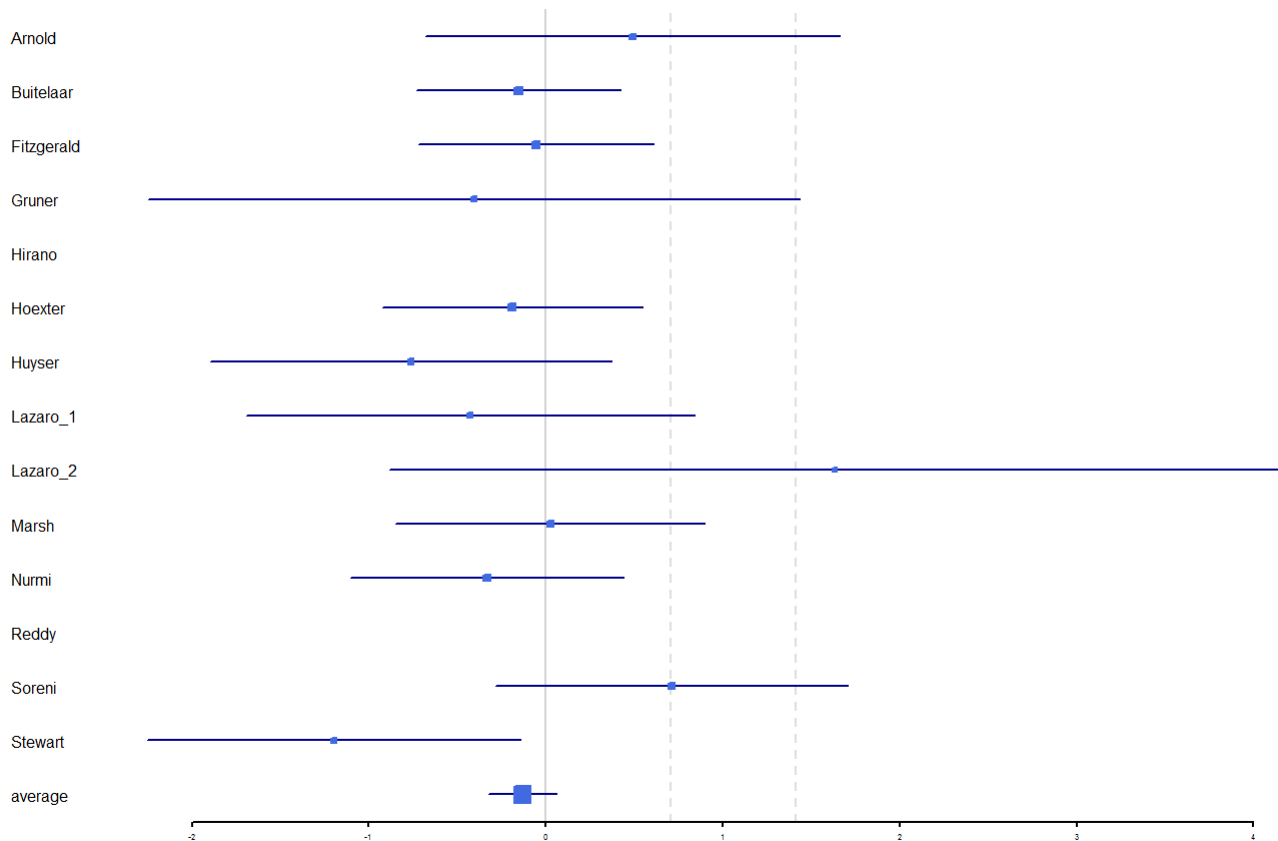

[Children]

### Mean Cortical Thickness ADHD vs HC. (I2= 52.88 )

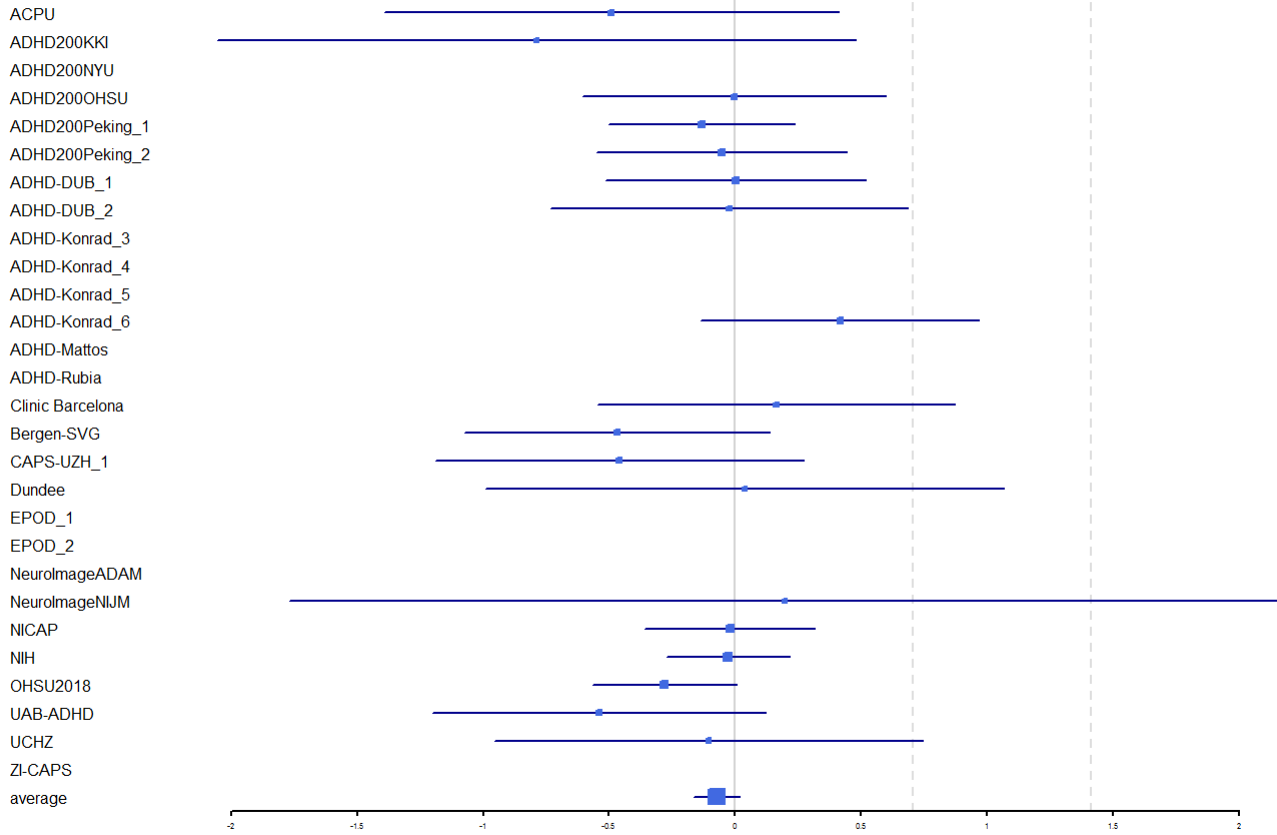

### Mean Cortical Thickness ASD vs HC. (I2= 52.88 )

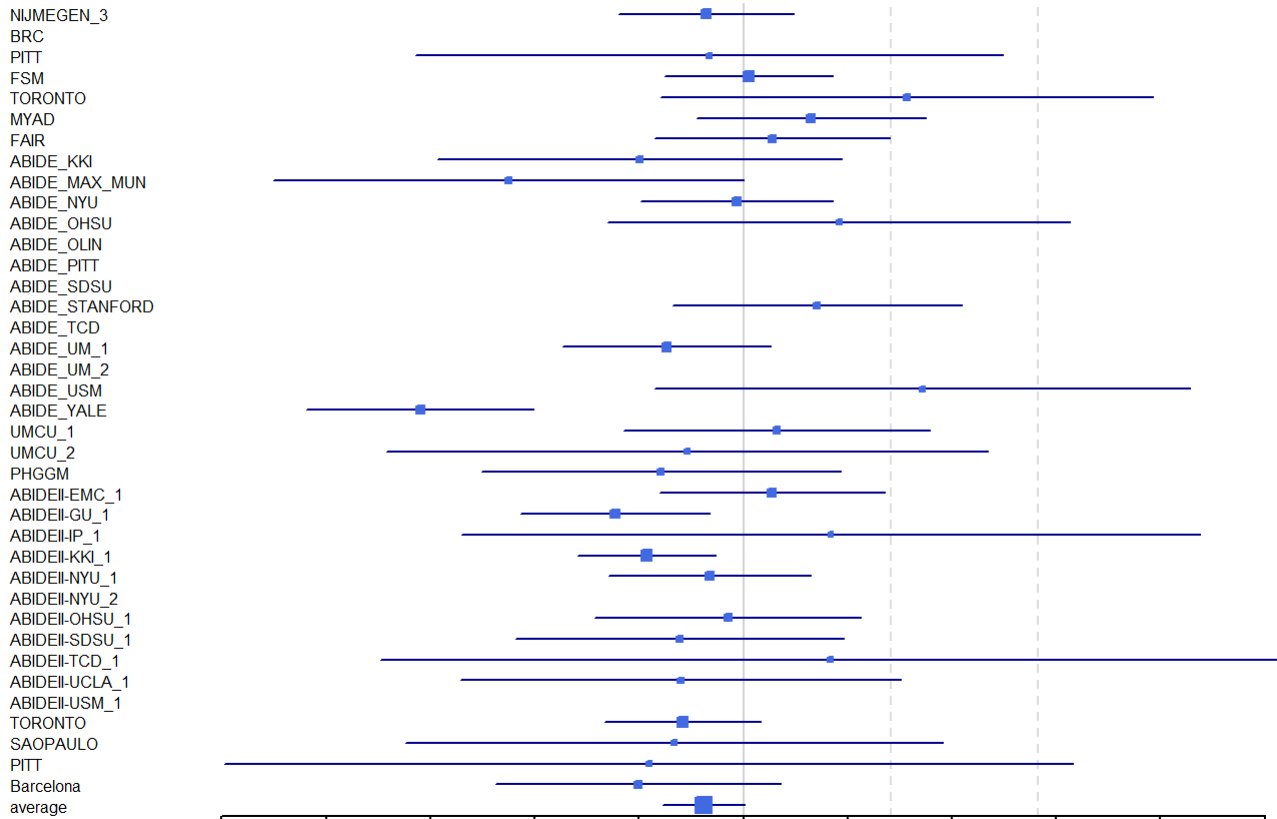

[Children]

### Full Surface Area OCD vs HC. (I2= 18.53 )

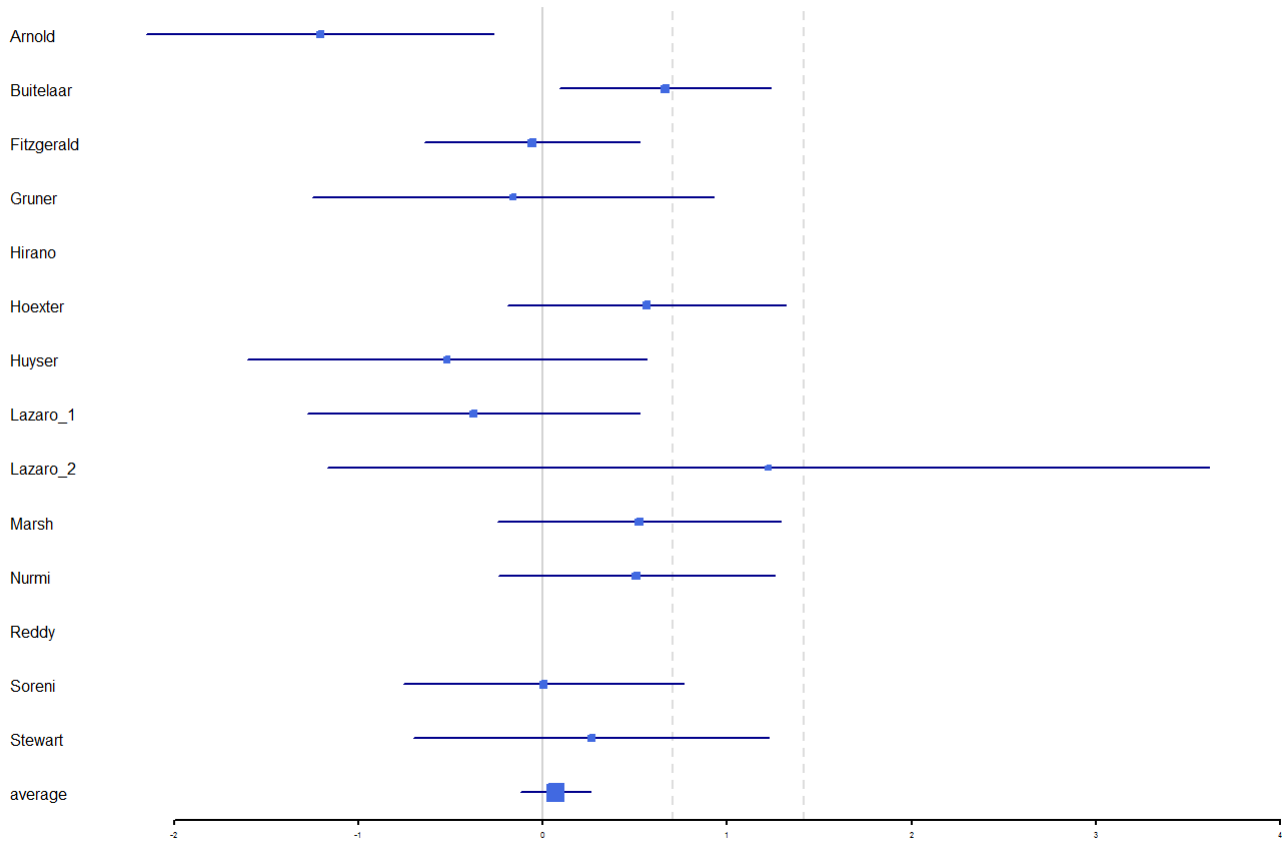

### Full Surface Area ADHD vs HC. (I2= 56.08 )

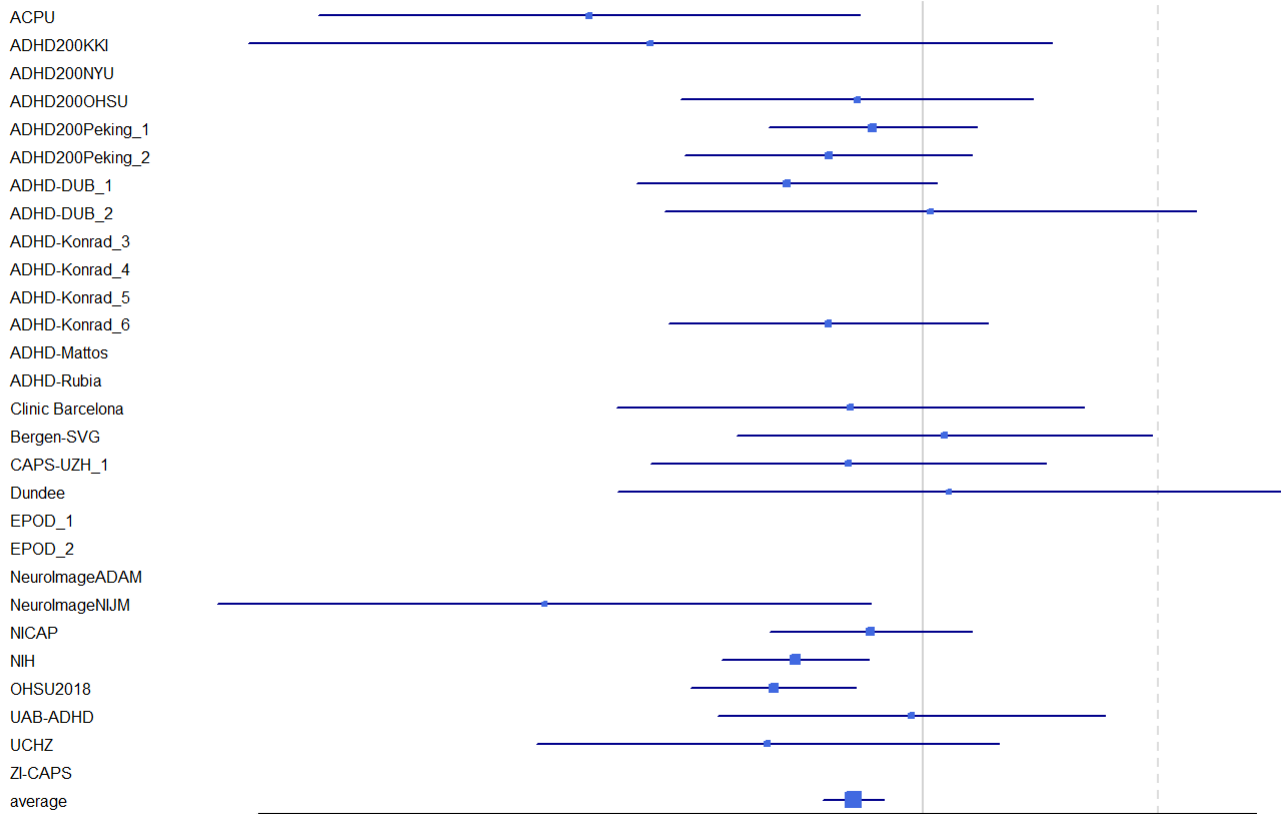

[Children]

### Full Surface Area ASD vs HC. (I2= 56.08 )

NIJMEGEN\_3  
BRC  
PITT  
FSM  
TORONTO  
MYAD  
FAIR  
ABIDE\_KKI  
ABIDE\_MAX\_MUN  
ABIDE\_NYU  
ABIDE\_OHSU  
ABIDE\_OLIN  
ABIDE\_PITT  
ABIDE\_SDSU  
ABIDE\_STANFORD  
ABIDE\_TCD  
ABIDE\_UM\_1  
ABIDE\_UM\_2  
ABIDE\_USM  
ABIDE\_YALE  
UMCU\_1  
UMCU\_2  
PHGGM  
ABIDEII-EMC\_1  
ABIDEII-GU\_1  
ABIDEII-IP\_1  
ABIDEII-KKI\_1  
ABIDEII-NYU\_1  
ABIDEII-NYU\_2  
ABIDEII-OHSU\_1  
ABIDEII-SDSU\_1  
ABIDEII-TCD\_1  
ABIDEII-UCLA\_1  
ABIDEII-USM\_1  
TORONTO  
SAOPAULO  
PITT  
Barcelona  
average

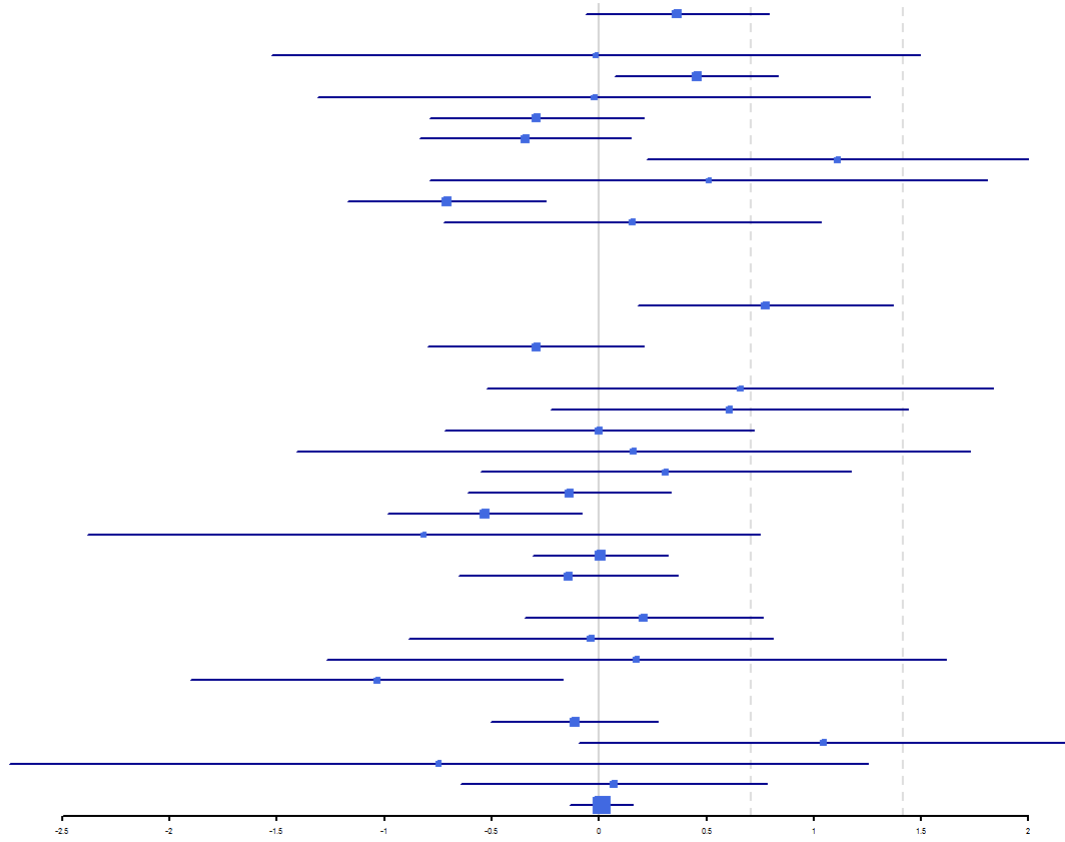

### Intracranial Volume OCD vs HC. (I2= 17.54 )

Arnold  
Buitelaar  
Fitzgerald  
Gruner  
Hirano  
Hoexter  
Huyser  
Lazaro\_1  
Lazaro\_2  
Marsh  
Nurmi  
Reddy  
Soreni  
Stewart  
average

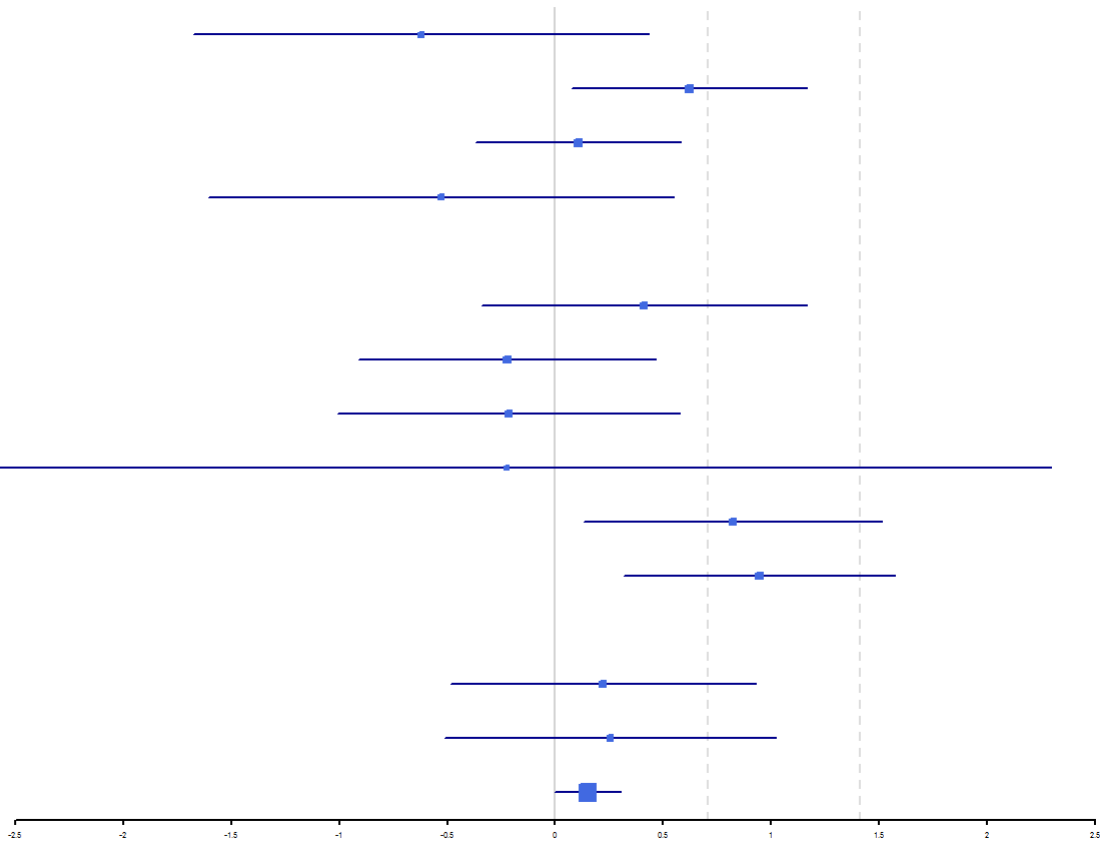

[Children]

### Intracranial Volume ADHD vs HC. (I2= 62.19 )

- ACPU
- ADHD200KKI
- ADHD200NYU
- ADHD200OHSU
- ADHD200Peking\_1
- ADHD200Peking\_2
- ADHD-DUB\_1
- ADHD-DUB\_2
- ADHD-Konrad\_3
- ADHD-Konrad\_4
- ADHD-Konrad\_5
- ADHD-Konrad\_6
- ADHD-Mattos
- ADHD-Rubia
- Clinic Barcelona
- Bergen-SVG
- CAPS-UZH\_1
- Dundee
- EPOD\_1
- EPOD\_2
- NeuroImageADAM
- NeuroImageNIJM
- NICAP
- NIH
- OHSU2018
- UAB-ADHD
- UCHZ
- ZI-CAPS
- average

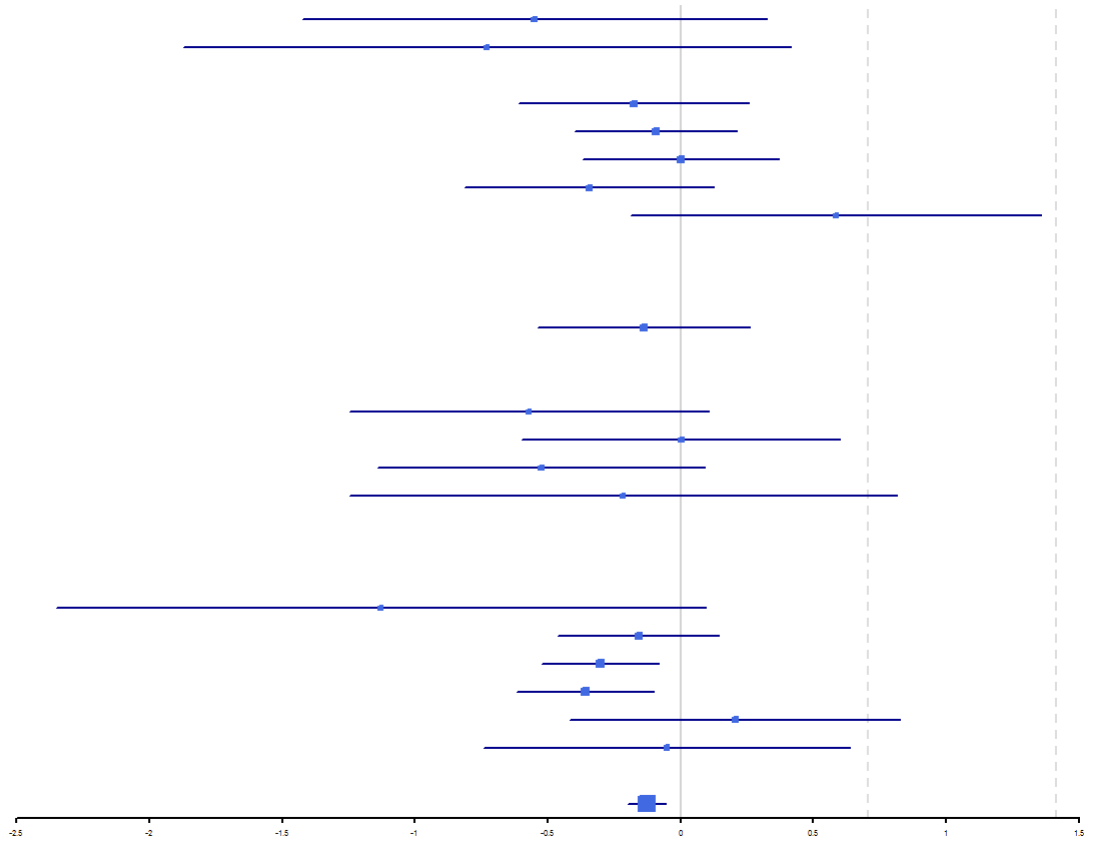

### Intracranial Volume ASD vs HC. (I2= 62.19 )

- NIJMEGEN\_3
- BRC
- PITT
- FSM
- TORONTO
- MYAD
- FAIR
- ABIDE\_KKI
- ABIDE\_MAX\_MUN
- ABIDE\_NYU
- ABIDE\_OHSU
- ABIDE\_OLIN
- ABIDE\_PITT
- ABIDE\_SDSU
- ABIDE\_STANFORD
- ABIDE\_TCD
- ABIDE\_UM\_1
- ABIDE\_UM\_2
- ABIDE\_USM
- ABIDE\_YALE
- UMCU\_1
- UMCU\_2
- PHGGM
- ABIDEII-EMC\_1
- ABIDEII-GU\_1
- ABIDEII-IP\_1
- ABIDEII-KKI\_1
- ABIDEII-NYU\_1
- ABIDEII-NYU\_2
- ABIDEII-OHSU\_1
- ABIDEII-SDSU\_1
- ABIDEII-TCD\_1
- ABIDEII-UCLA\_1
- ABIDEII-USM\_1
- TORONTO
- SAOPAULO
- PITT
- Barcelona
- average

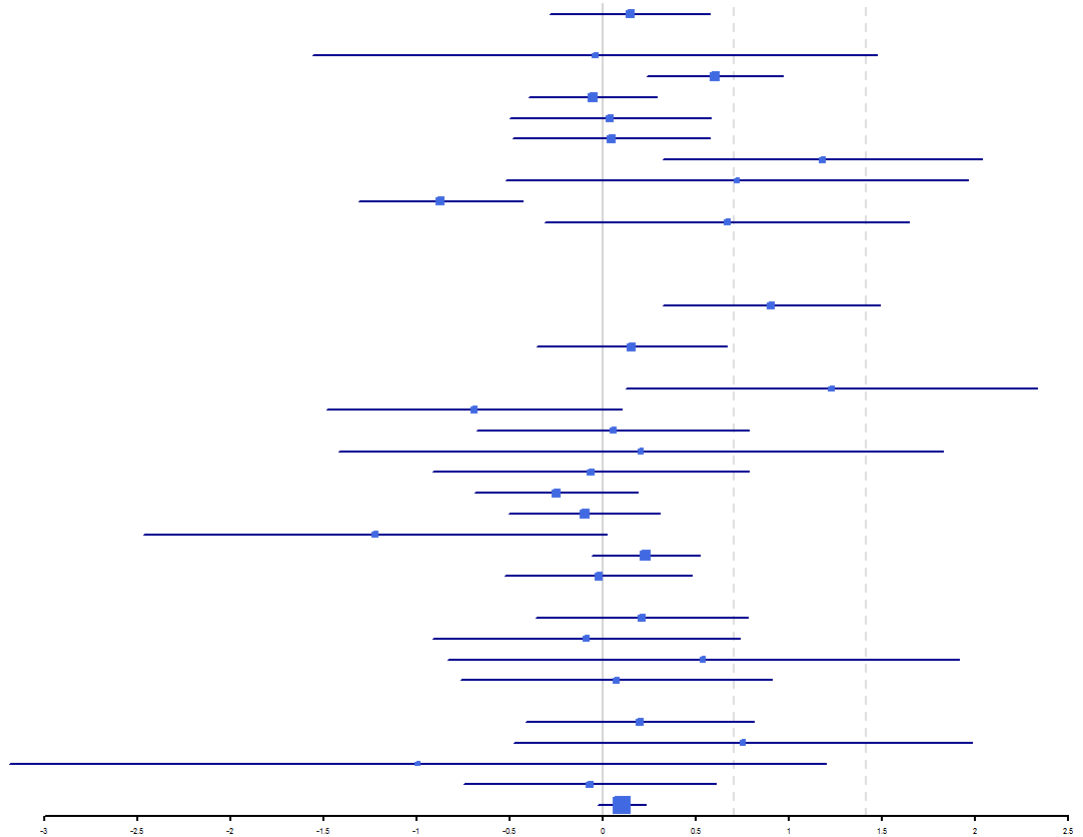



# Crossdisorder: forestplots

## Forest plots Adolescents

Forest plots are generated by running the standard regression model of each z-scored MRI feature  $x$  ( $y \sim x + \text{Age} + \text{Sex}$ ) again, for each site independently. Output are effect sizes and 95% confidence interval per feature.

[Adolescents]

### Mean Thalamus OCD vs HC. (I2= 11.84 )

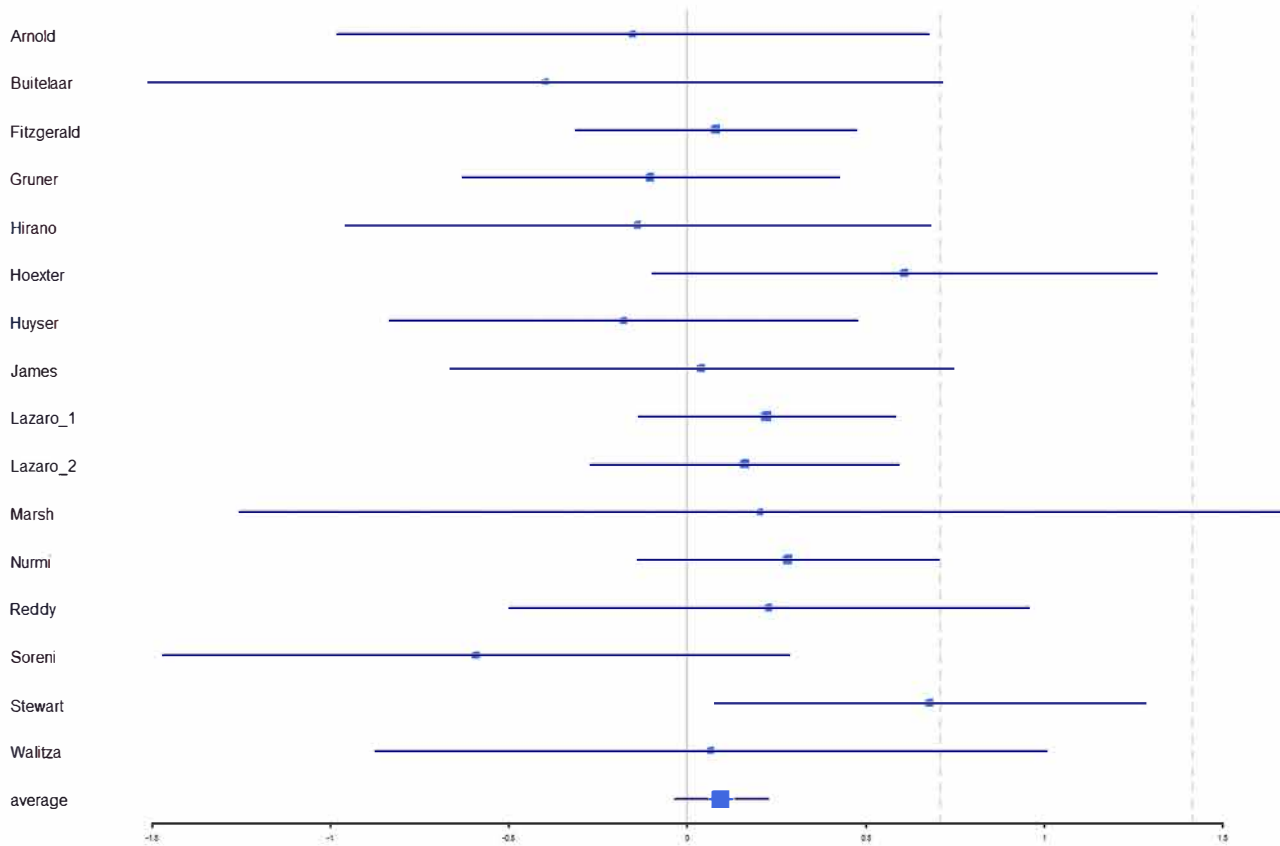

### Mean Thalamus ADHD vs HC. (I2= 13.03 )

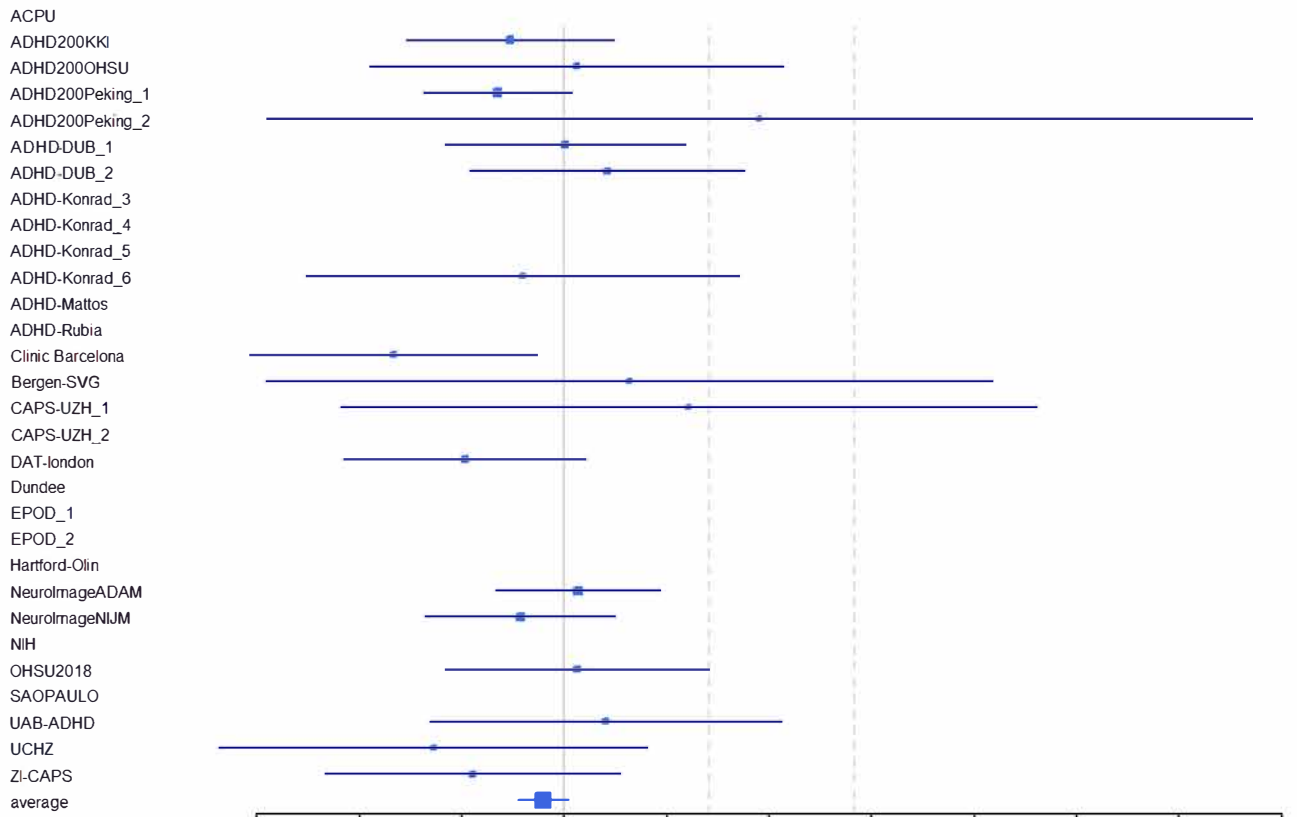

[Adolescents]

### Mean Thalamus ASD vs HC. (I2= 46.94 )

NIJMEGEN\_1-1  
NIJMEGEN\_1-2  
NIJMEGEN\_3  
BRC  
PITT  
TORONTO  
FAIR  
ABIDE\_CALTECH  
ABIDE\_KKI  
ABIDE\_LEUVEN\_2  
ABIDE\_MAX\_MUN  
ABIDE\_NYU  
ABIDE\_OHSU  
ABIDE\_OLIN  
ABIDE\_PITT  
ABIDE\_SDSU  
ABIDE\_STANFORD  
ABIDE\_TCD  
ABIDE\_UM\_1  
ABIDE\_UM\_2  
ABIDE\_USM  
ABIDE\_YALE  
UMCU\_1  
UMCU\_2  
TCD  
PHGGM  
ABIDEII-ETH\_1  
ABIDEII-GU\_1  
ABIDEII-IP\_1  
ABIDEII-U\_1  
ABIDEII-KKI\_1  
ABIDEII-NYU\_1  
ABIDEII-OHSU\_1  
ABIDEII-SDSU\_1  
ABIDEII-TCD\_1  
ABIDEII-UCD\_1  
ABIDEII-UCLA\_1  
ABIDEII-USM\_1  
TORONTO  
SAOPAULO  
PITT  
Barcelona  
average

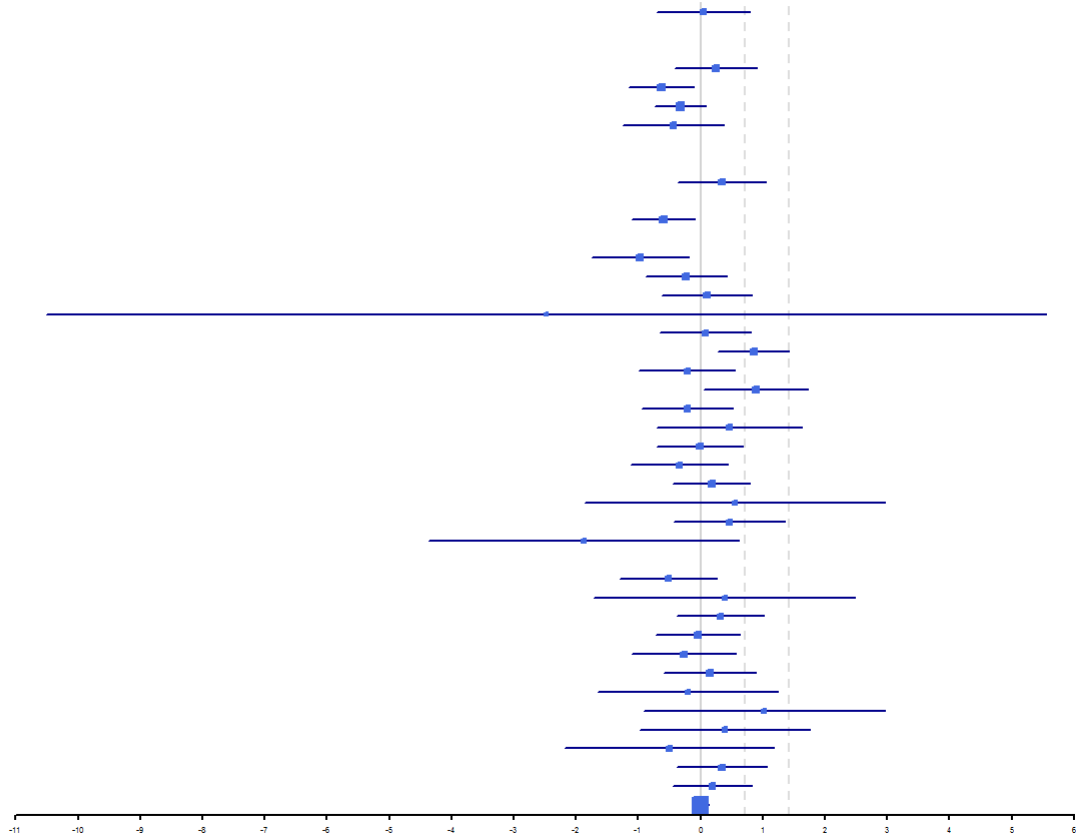

### Mean Putamen OCD vs HC. (I2= 25.08 )

Arnold  
Buitelaar  
Fitzgerald  
Gruner  
Hirano  
Hoexter  
Huyser  
James  
Lazaro\_1  
Lazaro\_2  
Marsh  
Nurmi  
Reddy  
Soreni  
Stewart  
Walitza  
average

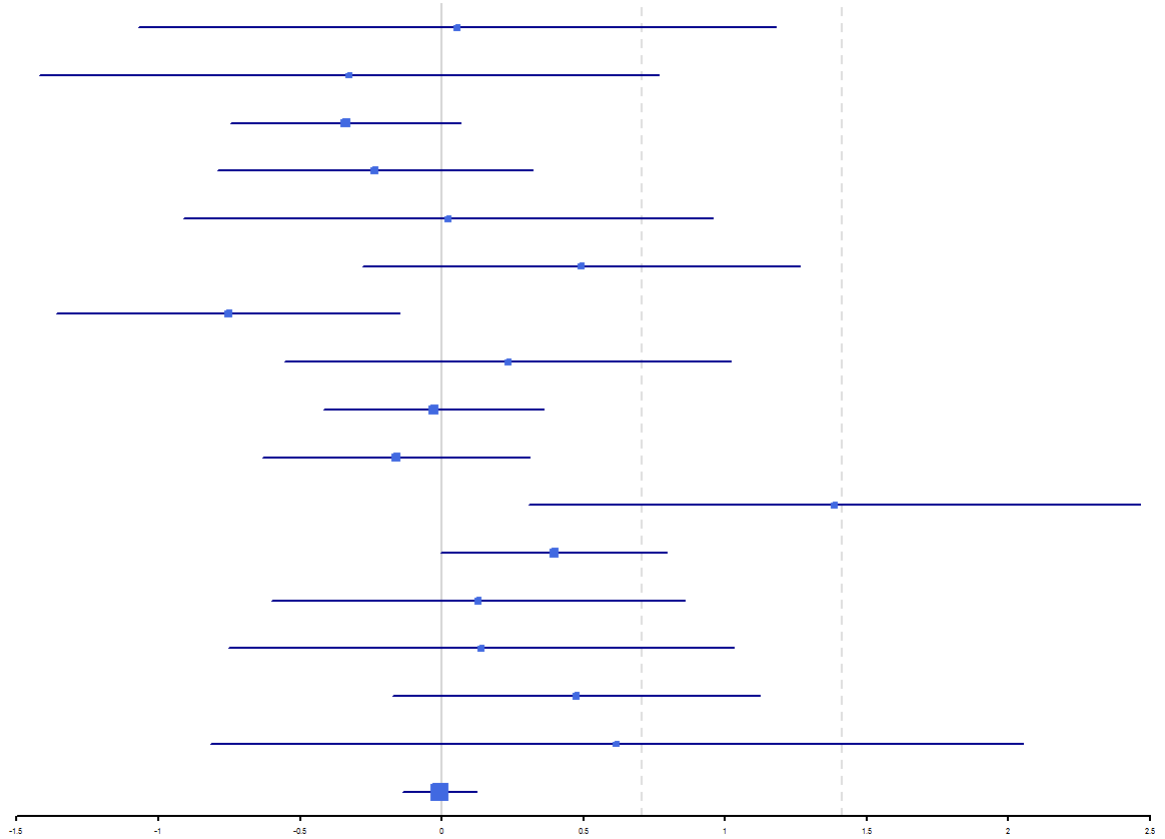

[Adolescents]

### Mean Putamen ADHD vs HC. (I2= 22.15 )

ACPU  
ADHD200KKI  
ADHD200OHSU  
ADHD200Peking\_1  
ADHD200Peking\_2  
ADHD-DUB\_1  
ADHD-DUB\_2  
ADHD-Konrad\_3  
ADHD-Konrad\_4  
ADHD-Konrad\_5  
ADHD-Konrad\_6  
ADHD-Mattos  
ADHD-Rubia  
Clinic Barcelona  
Bergen-SVG  
CAPS-UZH\_1  
CAPS-UZH\_2  
DAT-london  
Dundee  
EPOD\_1  
EPOD\_2  
Hartford-Olin  
NeuroImageADAM  
NeuroImageNIJM  
NIH  
OHSU2018  
SAOPAULO  
UAB-ADHD  
UCHZ  
ZI-CAPS  
average

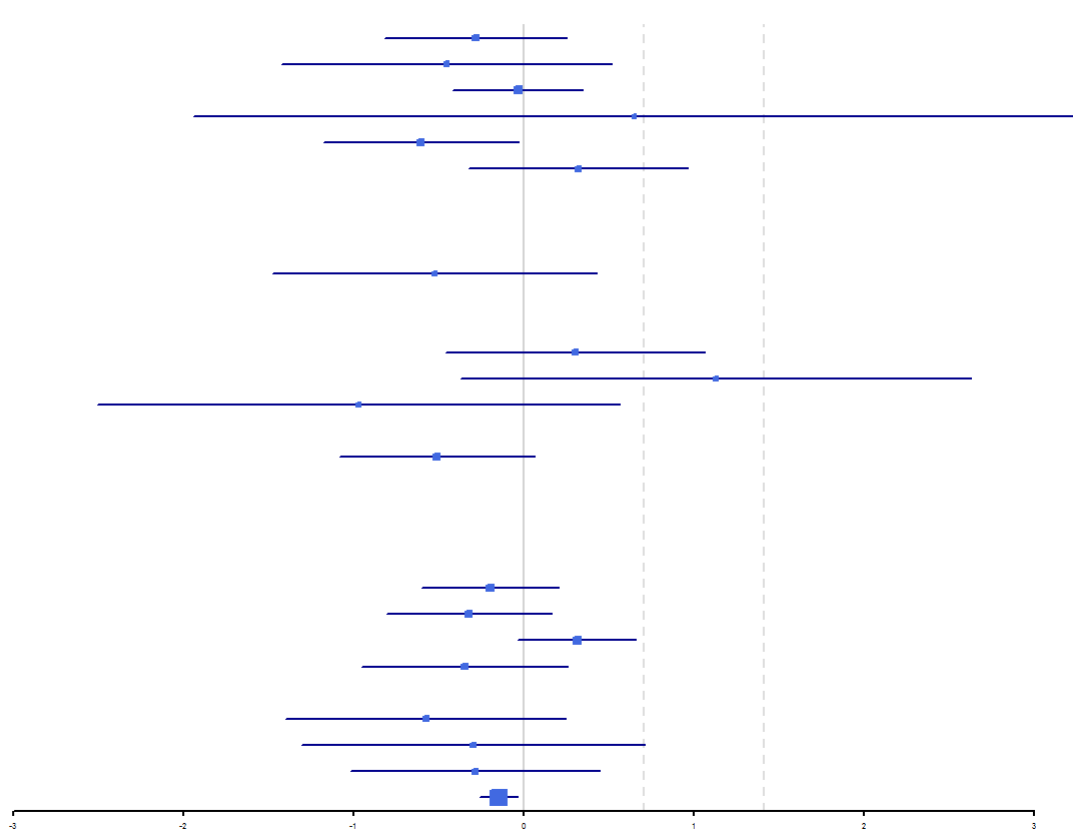

### Mean Putamen ASD vs HC. (I2= 72.68 )

NIJMEGEN\_1-1  
NIJMEGEN\_1-2  
NIJMEGEN\_3  
BRC  
PITT  
TORONTO  
FAIR  
ABIDE\_CALTECH  
ABIDE\_KKI  
ABIDE\_LEUVEN\_2  
ABIDE\_MAX\_MUN  
ABIDE\_NYU  
ABIDE\_OHSU  
ABIDE\_OLIN  
ABIDE\_PITT  
ABIDE\_SDSU  
ABIDE\_STANFORD  
ABIDE\_TCD  
ABIDE\_UM\_1  
ABIDE\_UM\_2  
ABIDE\_USM  
ABIDE\_YALE  
UMCU\_1  
UMCU\_2  
TCD  
PHGGM  
ABIDEII-ETH\_1  
ABIDEII-GU\_1  
ABIDEII-IP\_1  
ABIDEII-U\_1  
ABIDEII-KKI\_1  
ABIDEII-NYU\_1  
ABIDEII-OHSU\_1  
ABIDEII-SDSU\_1  
ABIDEII-TCD\_1  
ABIDEII-UCD\_1  
ABIDEII-UCLA\_1  
ABIDEII-USM\_1  
TORONTO  
SAOPAULO  
PITT  
Barcelona  
average

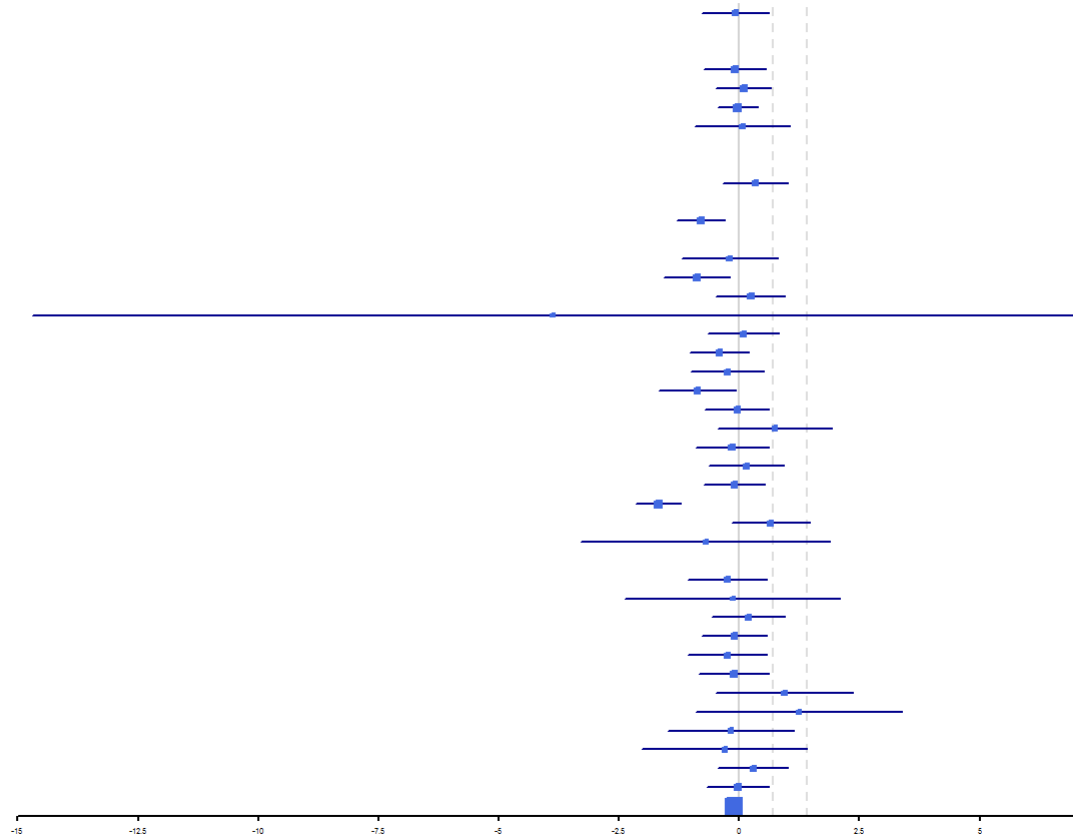

[Adolescents]

### Mean Hippocampus OCD vs HC. (I2= 16.49 )

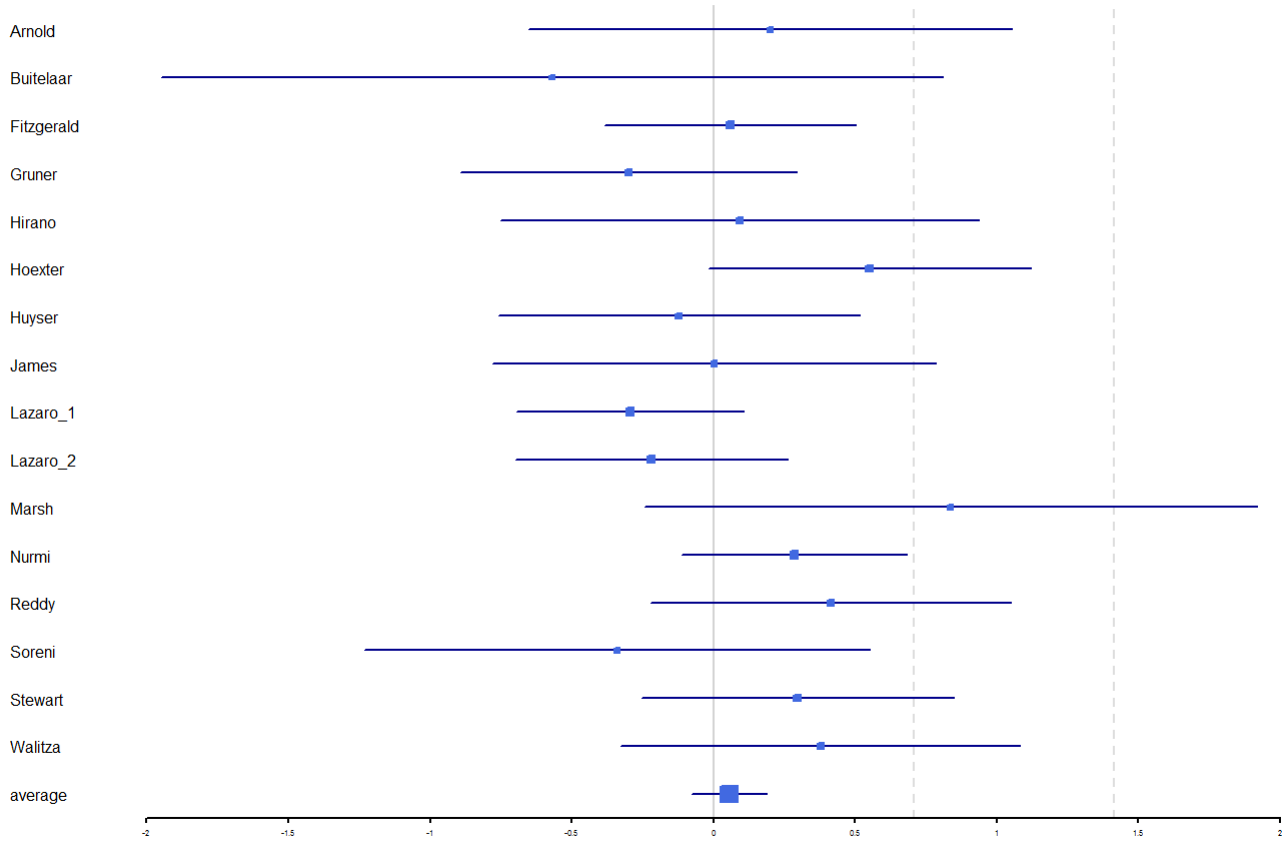

### Mean Hippocampus ADHD vs HC. (I2= 14.53 )

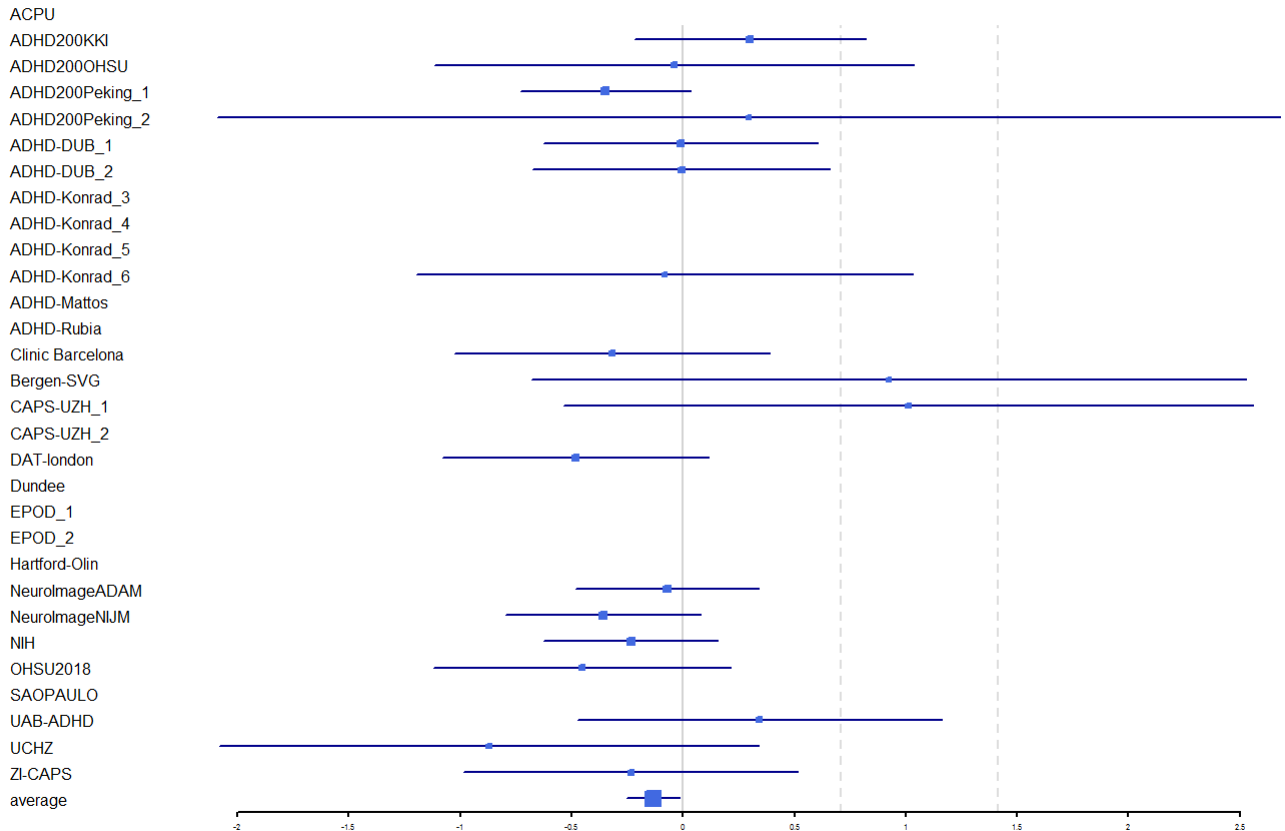

[Adolescents]

### Mean Hippocampus ASD vs HC. (I2= 511.13 )

NIJMEGEN\_1-1  
NIJMEGEN\_1-2  
NIJMEGEN\_3  
BRC  
PITT  
TORONTO  
FAIR  
ABIDE\_CALTECH  
ABIDE\_KKI  
ABIDE\_LEUVEN\_2  
ABIDE\_MAX\_MUN  
ABIDE\_NYU  
ABIDE\_OHSU  
ABIDE\_OLIN  
ABIDE\_PITT  
ABIDE\_SDSU  
ABIDE\_STANFORD  
ABIDE\_TCD  
ABIDE\_UM\_1  
ABIDE\_UM\_2  
ABIDE\_USM  
ABIDE\_YALE  
UMCU\_1  
UMCU\_2  
TCD  
PHGGM  
ABIDEII-ETH\_1  
ABIDEII-GU\_1  
ABIDEII-IP\_1  
ABIDEII-U\_1  
ABIDEII-KKI\_1  
ABIDEII-NYU\_1  
ABIDEII-OHSU\_1  
ABIDEII-SDSU\_1  
ABIDEII-TCD\_1  
ABIDEII-UCD\_1  
ABIDEII-UCLA\_1  
ABIDEII-USM\_1  
TORONTO  
SAOPAULO  
PITT  
Barcelona  
average

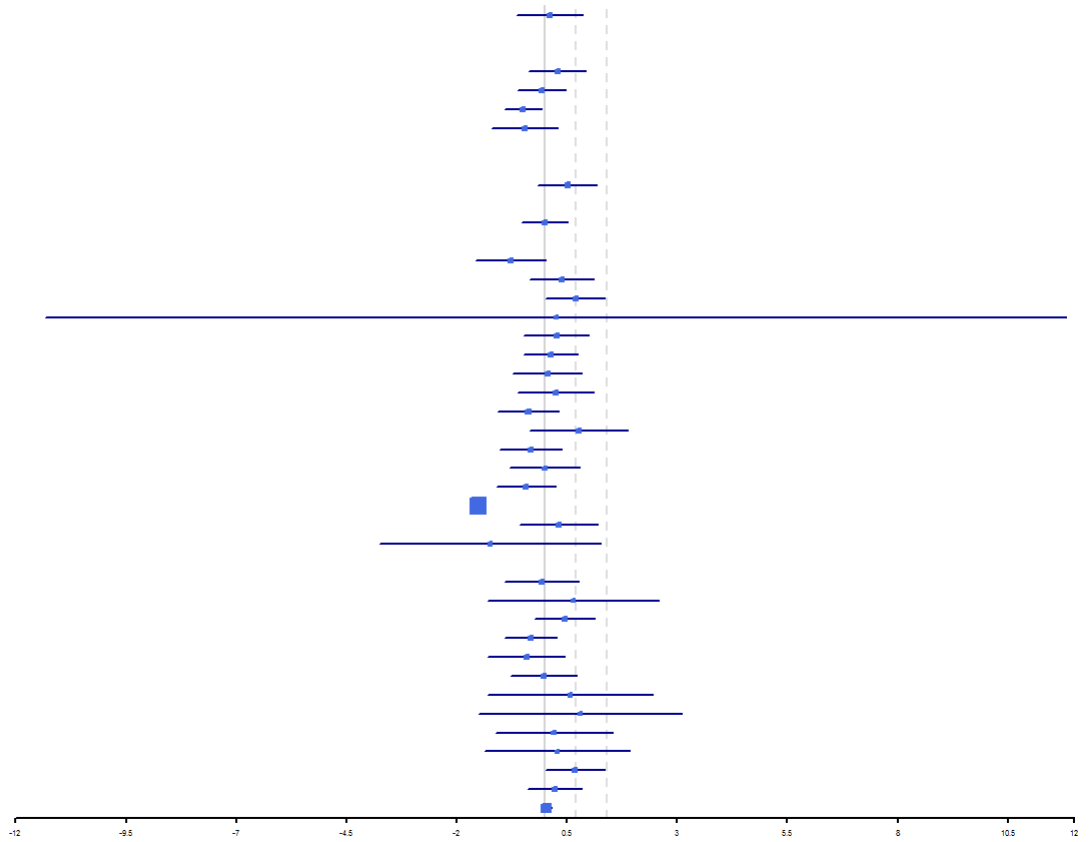

### Mean Amygdala OCD vs HC. (I2= 32.63 )

Arnold  
Buitelaar  
Fitzgerald  
Gruner  
Hirano  
Hoexter  
Huyser  
James  
Lazaro\_1  
Lazaro\_2  
Marsh  
Nurmi  
Reddy  
Soreni  
Stewart  
Walitza  
average

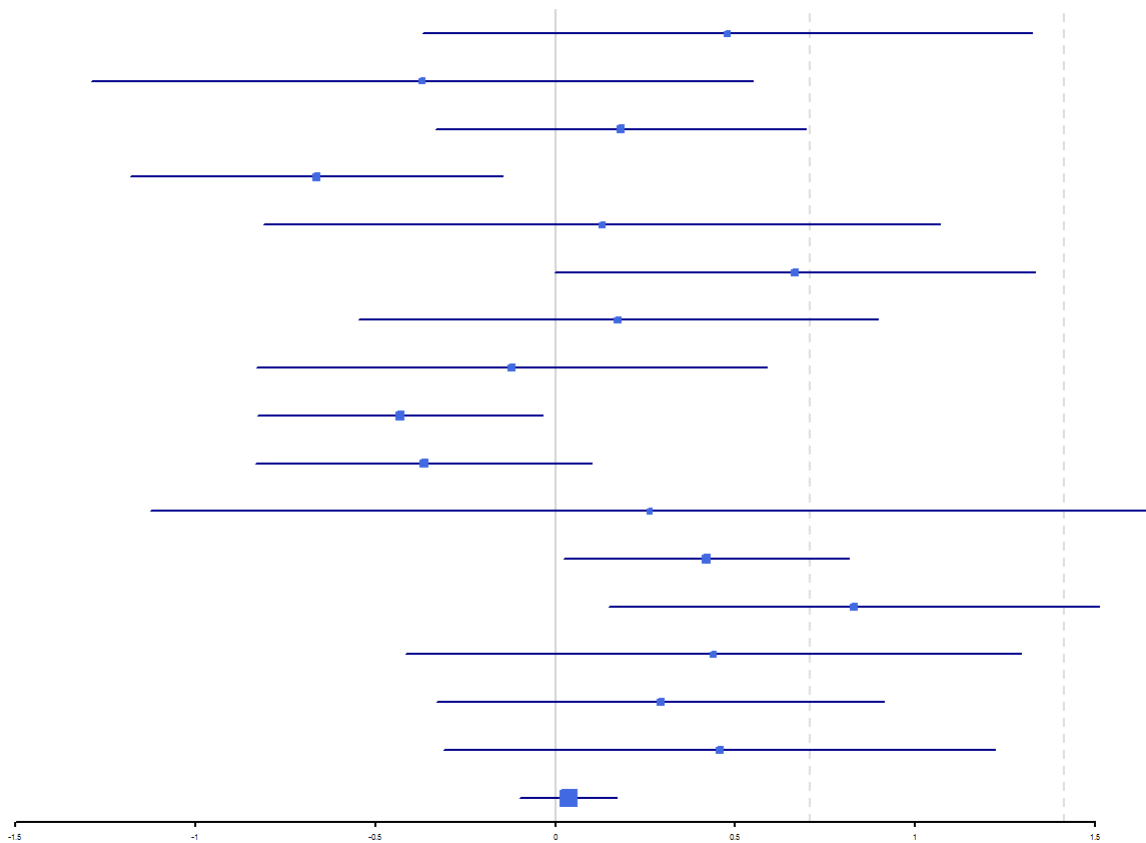

[Adolescents]

### Mean Amygdala ADHD vs HC. (I2= 7.59 )

ACPU  
ADHD200KKI  
ADHD200OHSU  
ADHD200Peking\_1  
ADHD200Peking\_2  
ADHD-DUB\_1  
ADHD-DUB\_2  
ADHD-Konrad\_3  
ADHD-Konrad\_4  
ADHD-Konrad\_5  
ADHD-Konrad\_6  
ADHD-Mattos  
ADHD-Rubia  
Clinic Barcelona  
Bergen-SVG  
CAPS-UZH\_1  
CAPS-UZH\_2  
DAT-london  
Dundee  
EPOD\_1  
EPOD\_2  
Hartford-Olin  
NeuroImageADAM  
NeuroImageNIJM  
NIH  
OHSU2018  
SAOPAULO  
UAB-ADHD  
UCHZ  
ZI-CAPS  
average

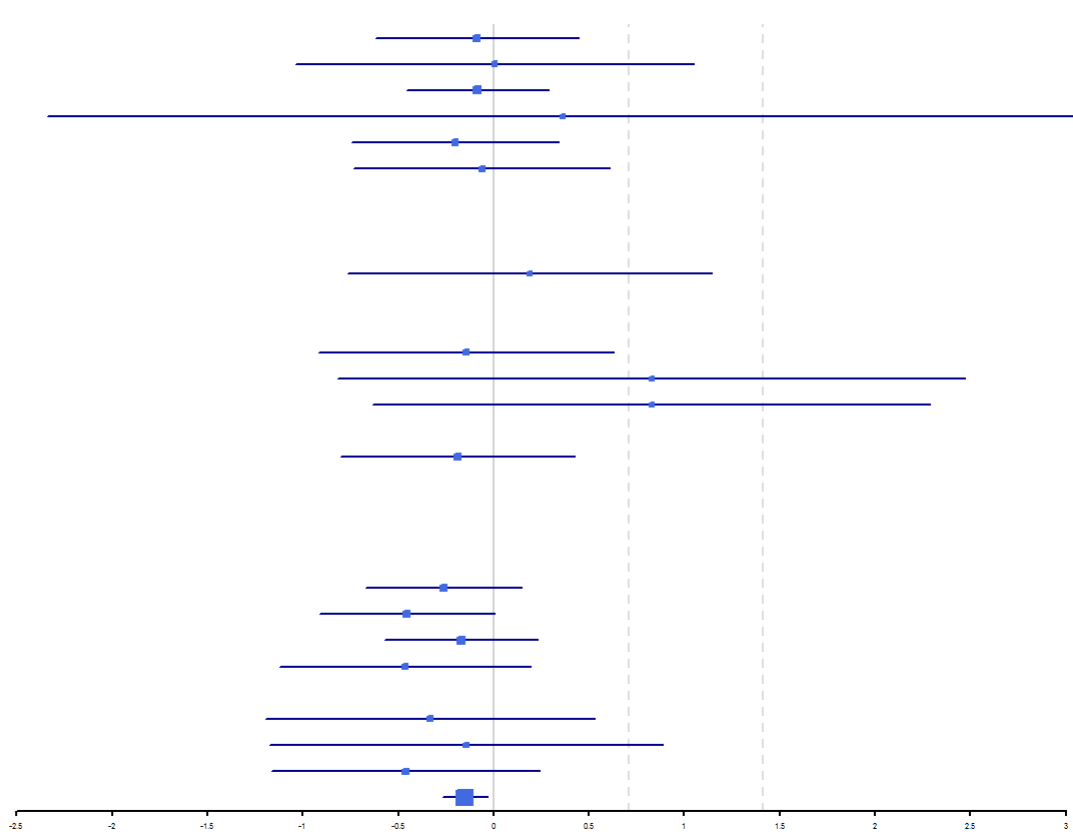

### Mean Amygdala ASD vs HC. (I2= 88.3 )

NIJMEGEN\_1-1  
NIJMEGEN\_1-2  
NIJMEGEN\_3  
BRC  
PITT  
TORONTO  
FAIR  
ABIDE\_CALTECH  
ABIDE\_KKI  
ABIDE\_LEUVEN\_2  
ABIDE\_MAX\_MUN  
ABIDE\_NYU  
ABIDE\_OHSU  
ABIDE\_OLIN  
ABIDE\_PITT  
ABIDE\_SDSU  
ABIDE\_STANFORD  
ABIDE\_TCD  
ABIDE\_UM\_1  
ABIDE\_UM\_2  
ABIDE\_USM  
ABIDE\_YALE  
UMCU\_1  
UMCU\_2  
TCD  
PHGGM  
ABIDEII-ETH\_1  
ABIDEII-GU\_1  
ABIDEII-IP\_1  
ABIDEII-U\_1  
ABIDEII-KKI\_1  
ABIDEII-NYU\_1  
ABIDEII-OHSU\_1  
ABIDEII-SDSU\_1  
ABIDEII-TCD\_1  
ABIDEII-UCD\_1  
ABIDEII-UCLA\_1  
ABIDEII-USM\_1  
TORONTO  
SAOPAULO  
PITT  
Barcelona  
average

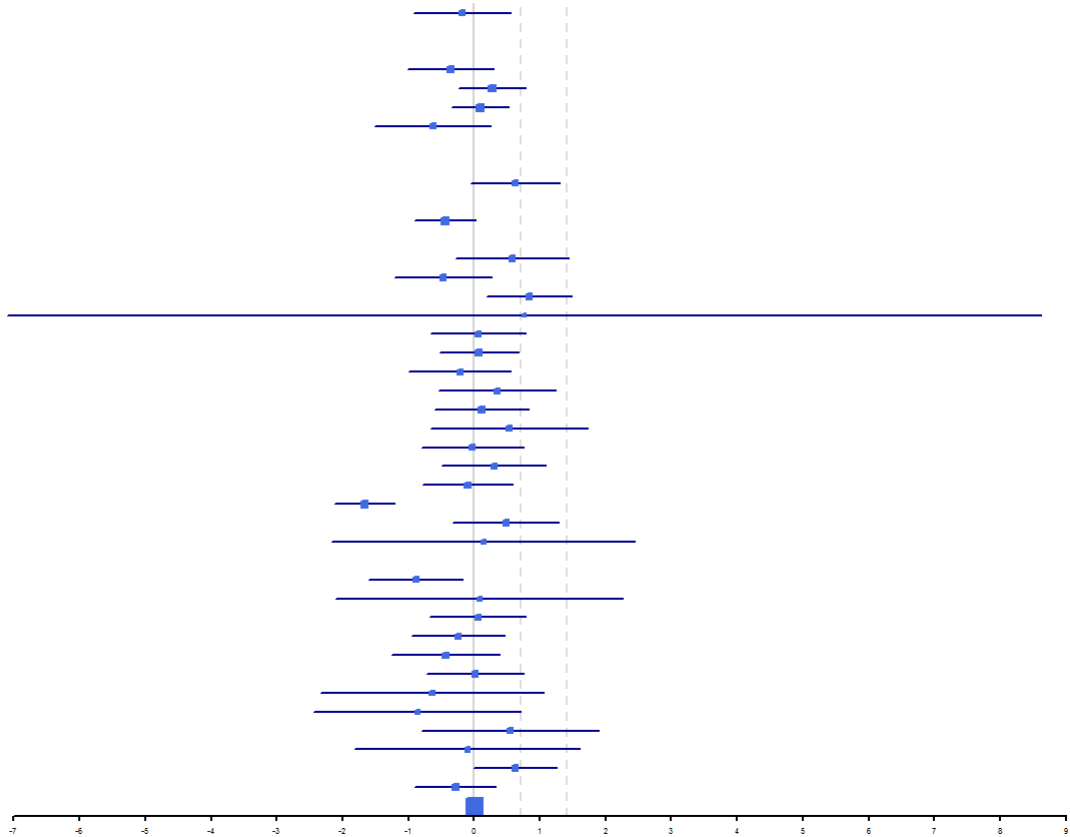

[Adolescents]

### Mean Thickness Orbitofrontal OCD vs HC. (I2= 15 )

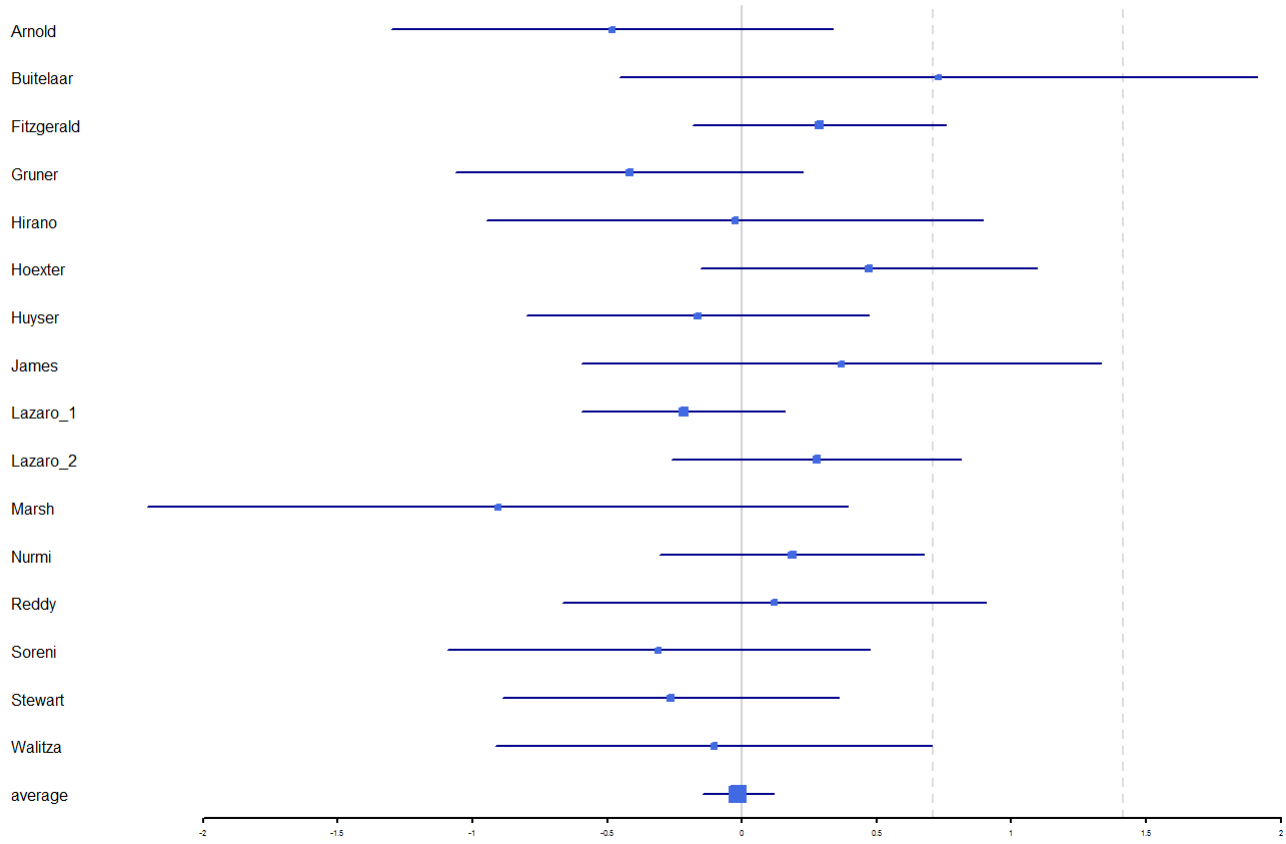

### Mean Thickness Orbitofrontal ADHD vs HC. (I2= 14.09 )

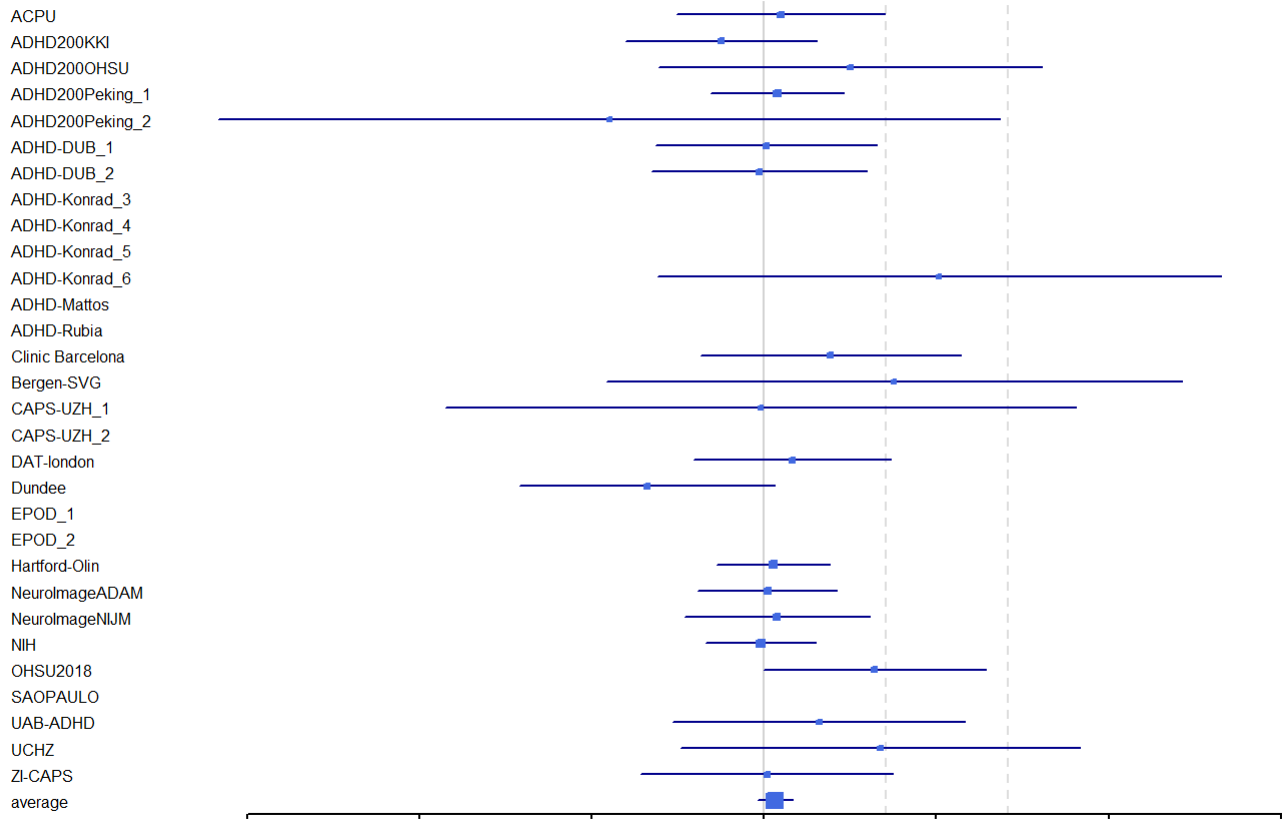



[Adolescents]

### Mean Thickness Orbitofrontal ASD vs HC. (I2= 92.64 )

NIJMEGEN\_1-1  
NIJMEGEN\_1-2  
NIJMEGEN\_3  
BRC  
PITT  
TORONTO  
FAIR  
ABIDE\_CALTECH  
ABIDE\_KKI  
ABIDE\_LEUVEN\_2  
ABIDE\_MAX\_MUN  
ABIDE\_NYU  
ABIDE\_OHSU  
ABIDE\_OLIN  
ABIDE\_PITT  
ABIDE\_SDSU  
ABIDE\_STANFORD  
ABIDE\_TCD  
ABIDE\_UM\_1  
ABIDE\_UM\_2  
ABIDE\_USM  
ABIDE\_YALE  
UMCU\_1  
UMCU\_2  
TCD  
PHGGM  
ABIDEII-ETH\_1  
ABIDEII-GU\_1  
ABIDEII-IP\_1  
ABIDEII-U\_1  
ABIDEII-KKI\_1  
ABIDEII-NYU\_1  
ABIDEII-OHSU\_1  
ABIDEII-SDSU\_1  
ABIDEII-TCD\_1  
ABIDEII-UCD\_1  
ABIDEII-UCLA\_1  
ABIDEII-USM\_1  
TORONTO  
SAOPAULO  
PITT  
Barcelona  
average

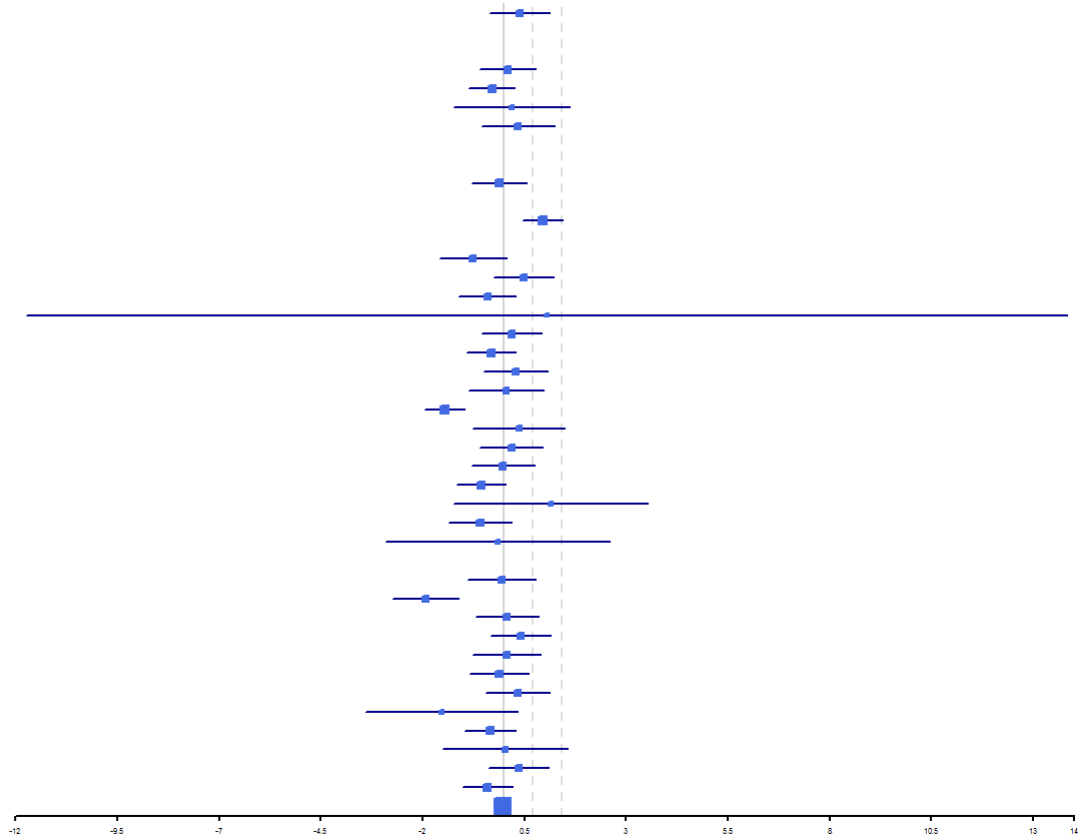

### Mean Thickness Pars Triangularis OCD vs HC. (I2= 13.2 )

Arnold  
Buitelaar  
Fitzgerald  
Gruner  
Hirano  
Hoexter  
Huyser  
James  
Lazaro\_1  
Lazaro\_2  
Marsh  
Nurmi  
Reddy  
Soreni  
Stewart  
Walitza  
average

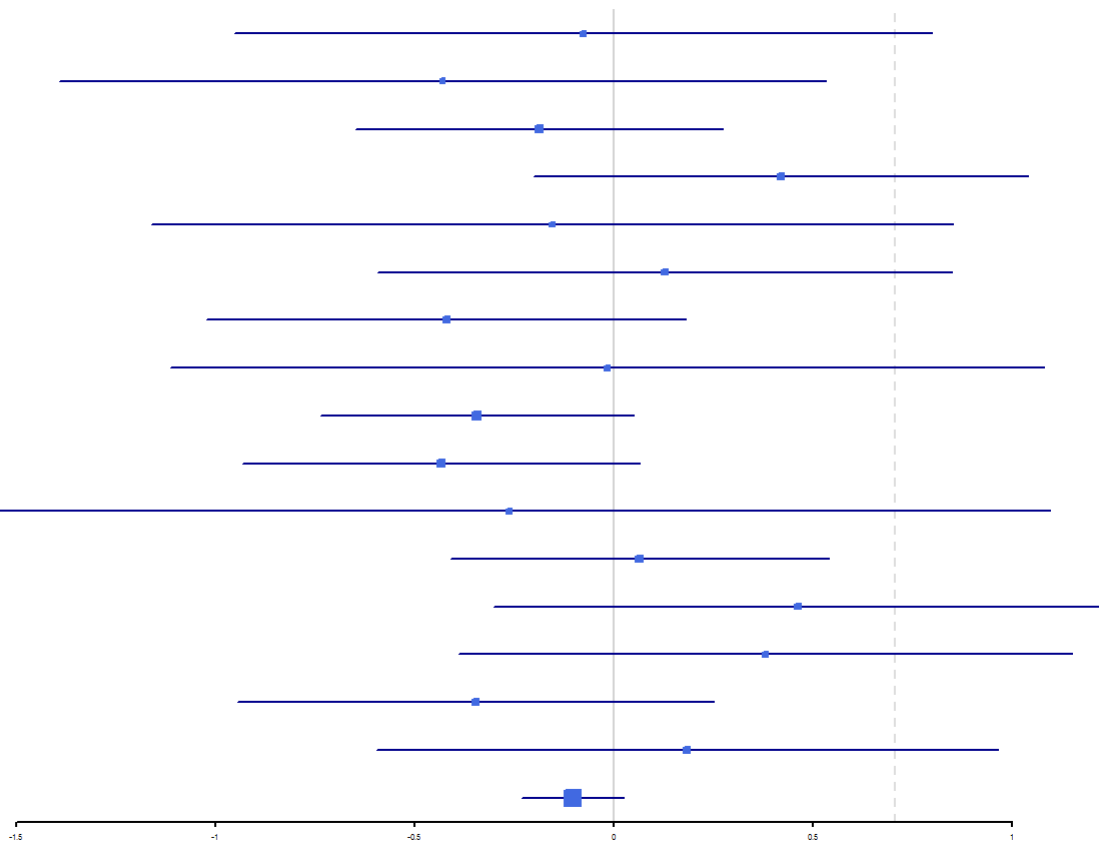

[Adolescents]

### Mean Thickness Pars Triangularis ADHD vs HC. (I2= 20.7 )

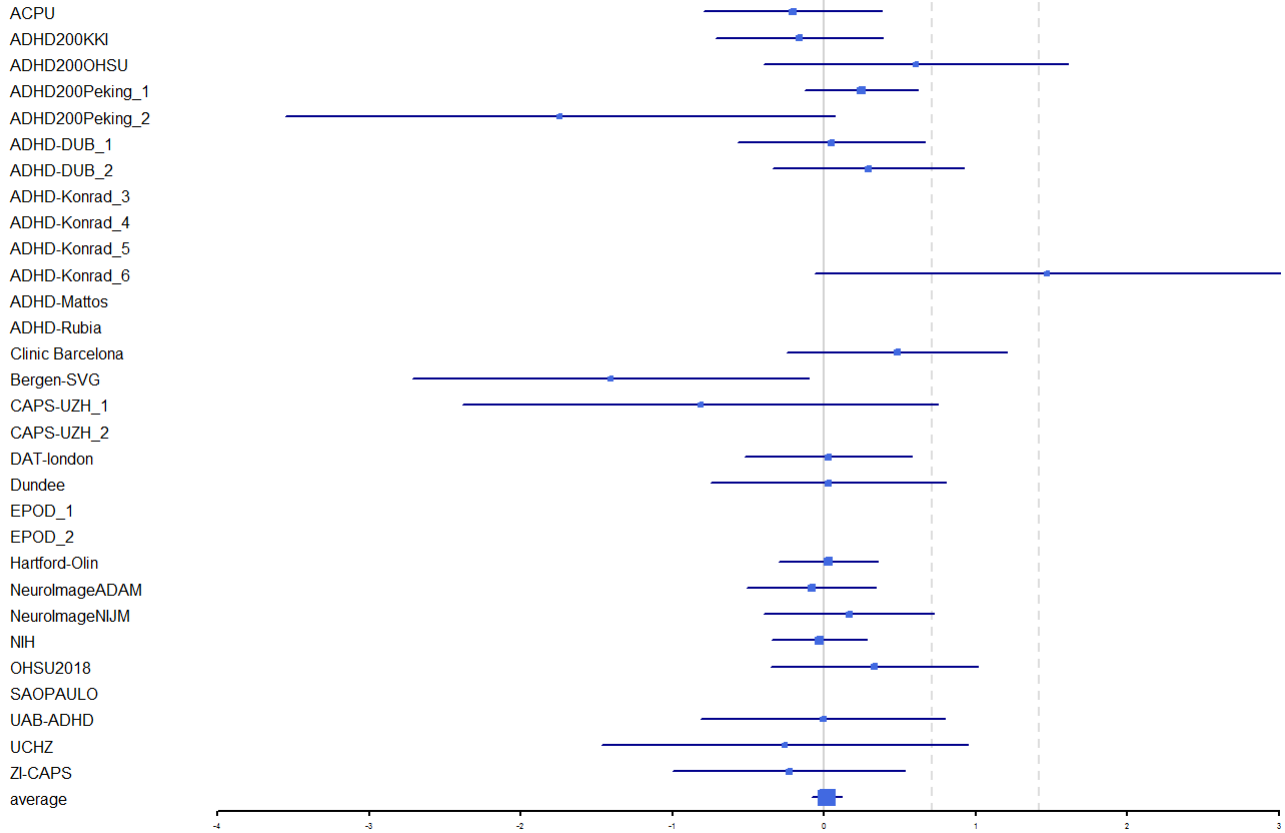

### Mean Thickness Pars Triangularis ASD vs HC. (I2= 272.41 )

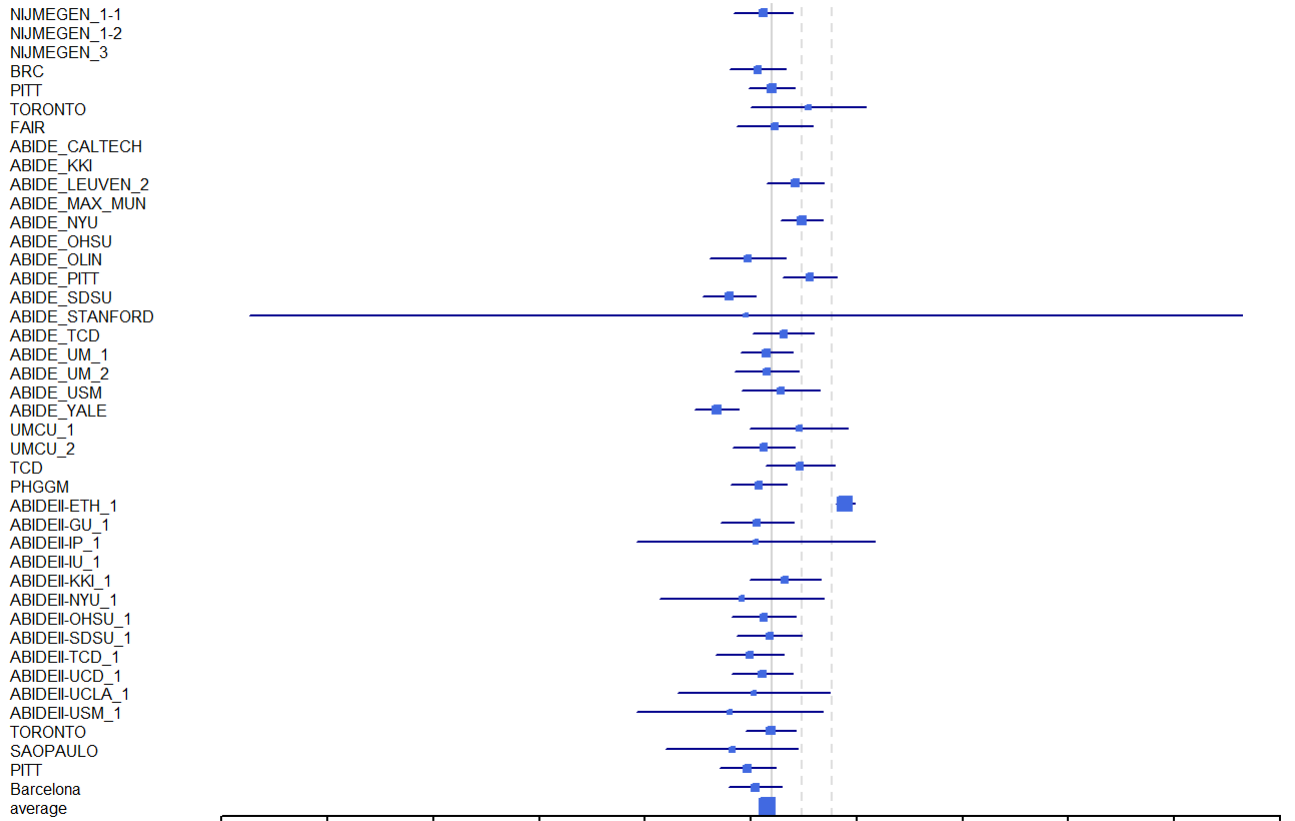

[Adolescents]

### Mean Thickness Poserior Cingulate OCD vs HC. (I2= 34.9 )

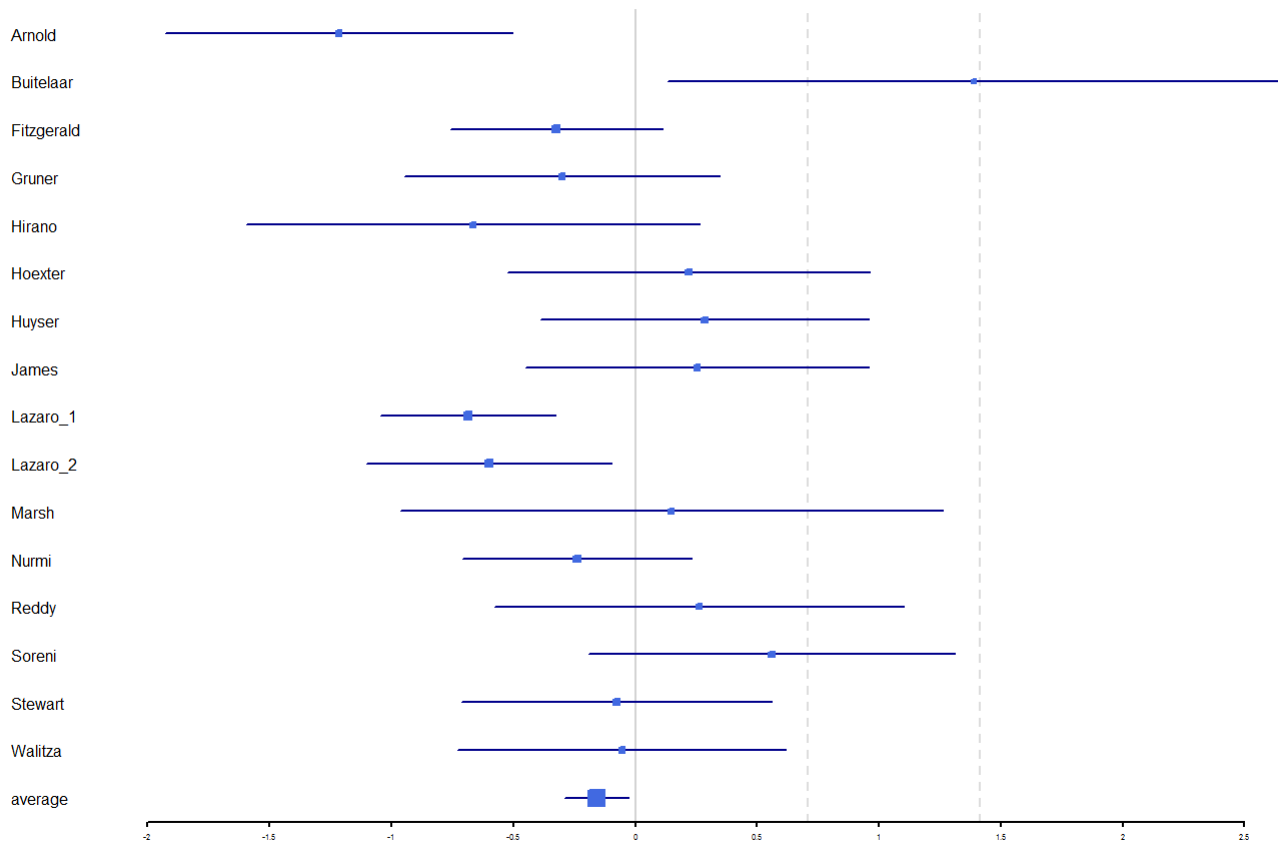

### Mean Thickness Poserior Cingulate ADHD vs HC. (I2= 19.01 )

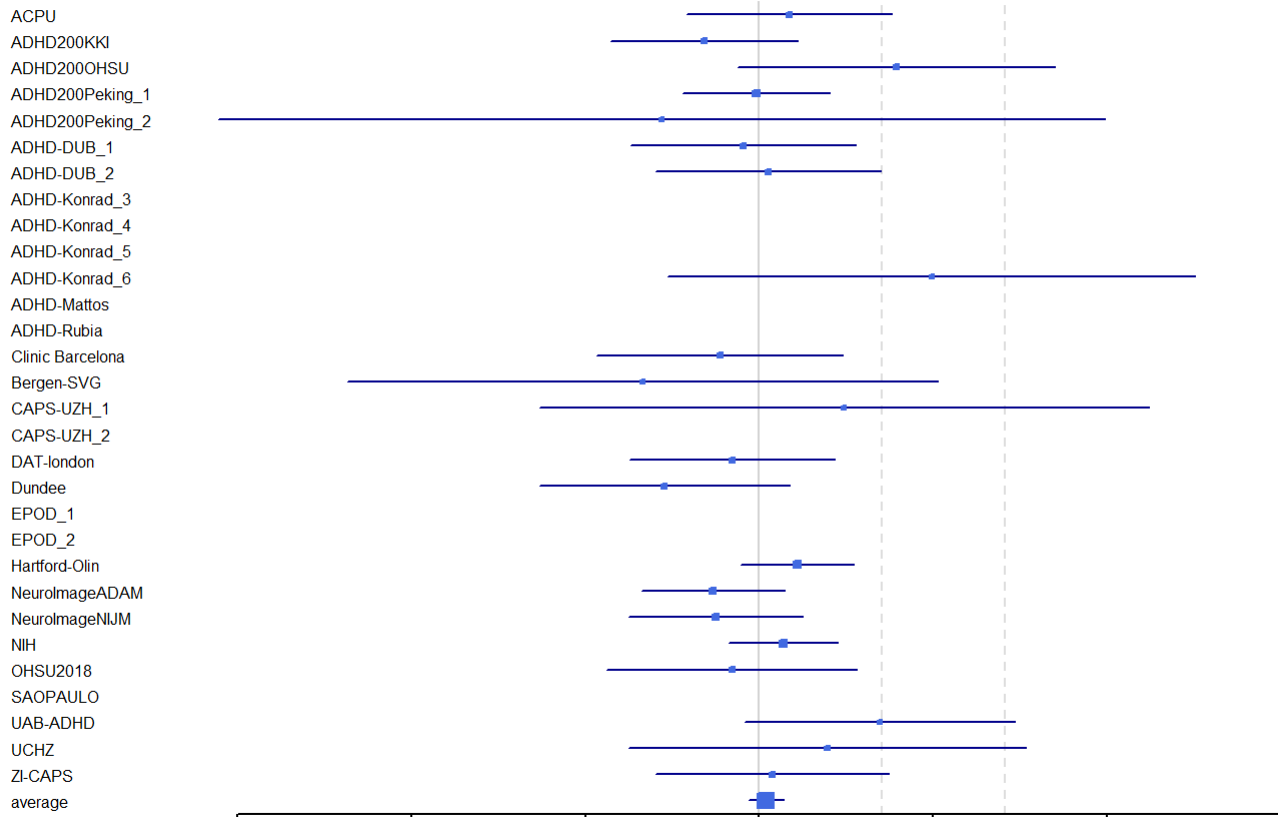

[Adolescents]

### Mean Thickness Poserior Cingulate ASD vs HC. (I2= 89.09 )

NIJMEGEN\_1-1  
NIJMEGEN\_1-2  
NIJMEGEN\_3  
BRC  
PITT  
TORONTO  
FAIR  
ABIDE\_CALTECH  
ABIDE\_KKI  
ABIDE\_LEUVEN\_2  
ABIDE\_MAX\_MUN  
ABIDE\_NYU  
ABIDE\_OHSU  
ABIDE\_OLIN  
ABIDE\_PITT  
ABIDE\_SDSU  
ABIDE\_STANFORD  
ABIDE\_TCD  
ABIDE\_UM\_1  
ABIDE\_UM\_2  
ABIDE\_USM  
ABIDE\_YALE  
UMCU\_1  
UMCU\_2  
TCD  
PHGGM  
ABIDEII-ETH\_1  
ABIDEII-GU\_1  
ABIDEII-IP\_1  
ABIDEII-IU\_1  
ABIDEII-KKI\_1  
ABIDEII-NYU\_1  
ABIDEII-OHSU\_1  
ABIDEII-SDSU\_1  
ABIDEII-TCD\_1  
ABIDEII-UCLA\_1  
ABIDEII-USM\_1  
TORONTO  
SAOPAULO  
PITT  
Barcelona  
average

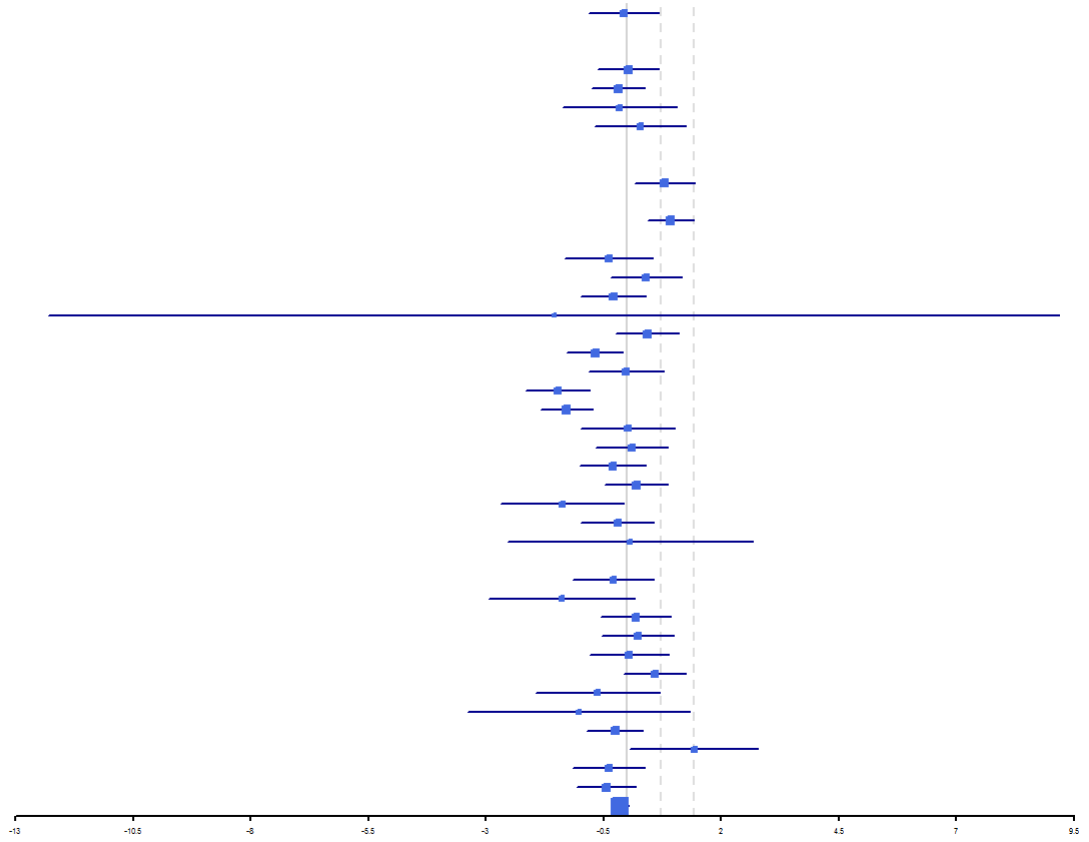

### Mean Cortical Thickness OCD vs HC. (I2= 25.51 )

Arnold  
Buitelaar  
Fitzgerald  
Gruner  
Hirano  
Hoexter  
Huyser  
James  
Lazaro\_1  
Lazaro\_2  
Marsh  
Nurmi  
Reddy  
Soreni  
Stewart  
Walitza  
average

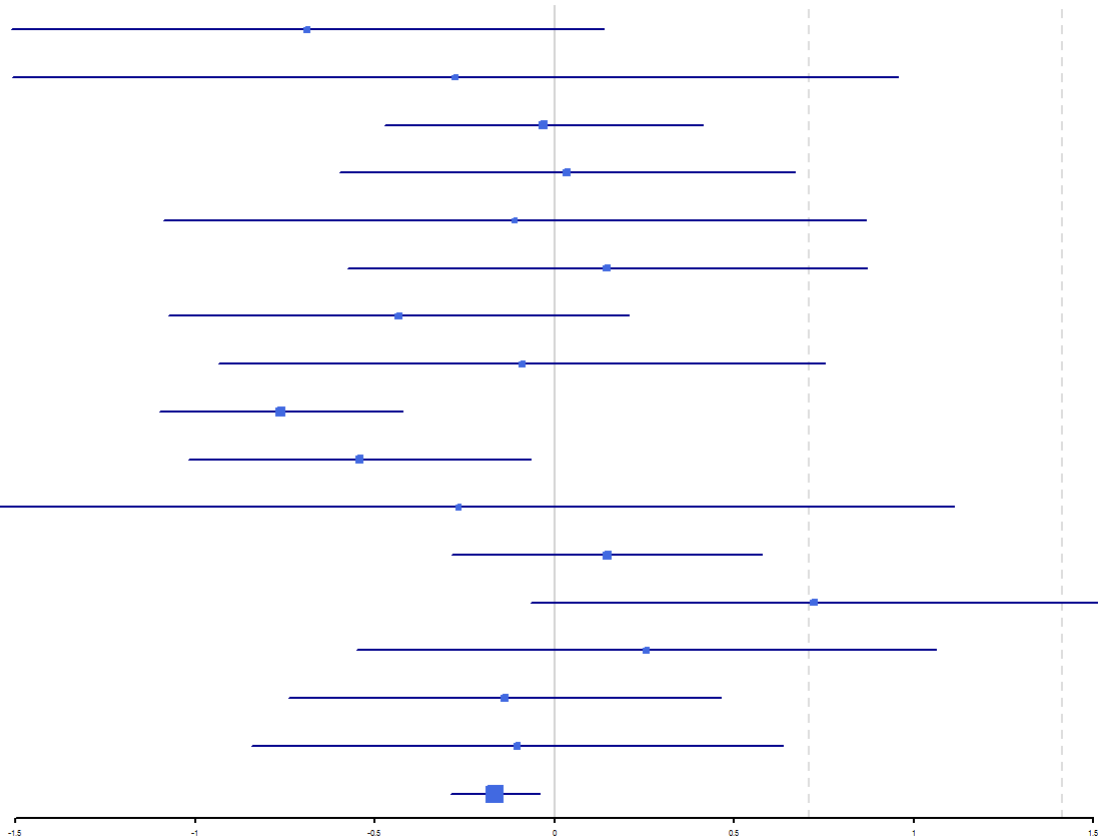

[Adolescents]

### Mean Cortical Thickness ADHD vs HC. (I2= 14.99 )

- ACPU
- ADHD200KKI
- ADHD200OHSU
- ADHD200Peking\_1
- ADHD200Peking\_2
- ADHD-DUB\_1
- ADHD-DUB\_2
- ADHD-Konrad\_3
- ADHD-Konrad\_4
- ADHD-Konrad\_5
- ADHD-Konrad\_6
- ADHD-Mattos
- ADHD-Rubia
- Clinic Barcelona
- Bergen-SVG
- CAPS-UZH\_1
- CAPS-UZH\_2
- DAT-london
- Dundee
- EPOD\_1
- EPOD\_2
- Hartford-Olin
- NeuroImageADAM
- NeuroImageNIJM
- NIH
- OHSU2018
- SAOPAULO
- UAB-ADHD
- UCHZ
- ZI-CAPS
- average

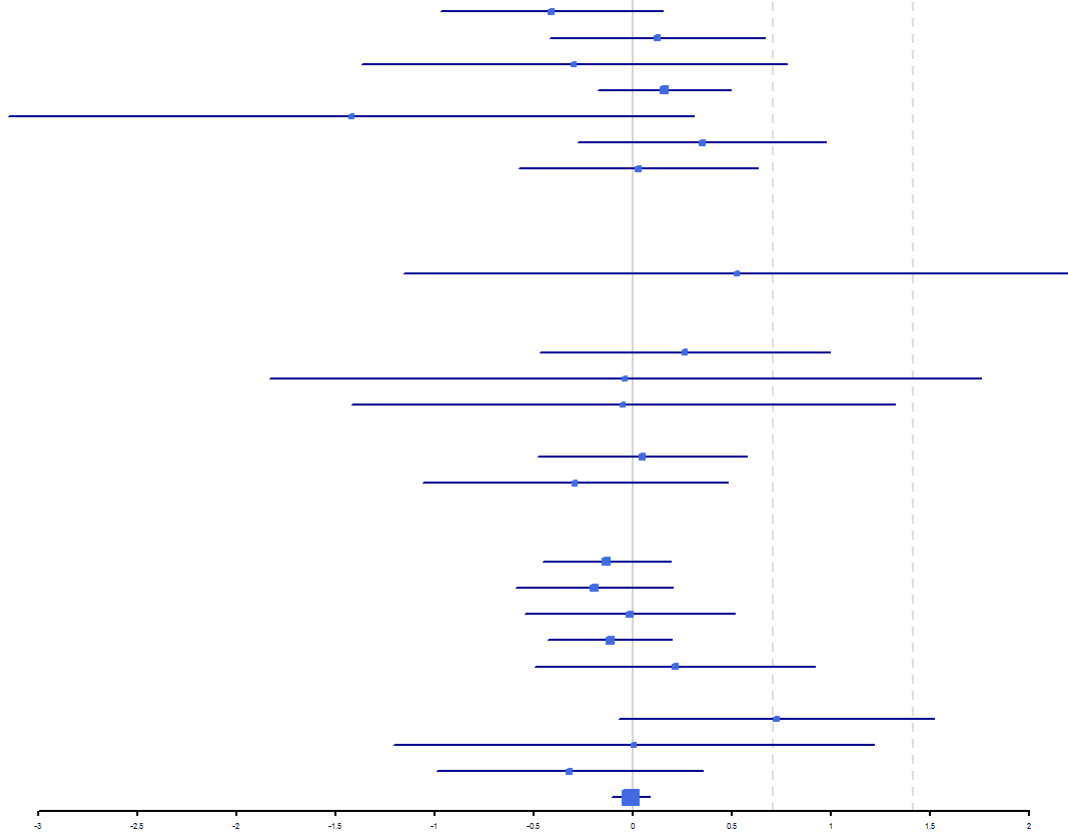

### Mean Cortical Thickness ASD vs HC. (I2= 79.74 )

- NIJMEGEN\_1-1
- NIJMEGEN\_1-2
- NIJMEGEN\_3
- BRC
- PITT
- TORONTO
- FAIR
- ABIDE\_CALTECH
- ABIDE\_KKI
- ABIDE\_LEUVEN\_2
- ABIDE\_MAX\_MUN
- ABIDE\_NYU
- ABIDE\_OHSU
- ABIDE\_OLIN
- ABIDE\_PITT
- ABIDE\_SDSU
- ABIDE\_STANFORD
- ABIDE\_TCD
- ABIDE\_UM\_1
- ABIDE\_UM\_2
- ABIDE\_USM
- ABIDE\_YALE
- UMCU\_1
- UMCU\_2
- TCD
- PHGGM
- ABIDEII-ETH\_1
- ABIDEII-GU\_1
- ABIDEII-IP\_1
- ABIDEII-U\_1
- ABIDEII-KKI\_1
- ABIDEII-NYU\_1
- ABIDEII-OHSU\_1
- ABIDEII-SDSU\_1
- ABIDEII-TCD\_1
- ABIDEII-UCD\_1
- ABIDEII-UCLA\_1
- ABIDEII-USM\_1
- TORONTO
- SAOPAULO
- PITT
- Barcelona
- average

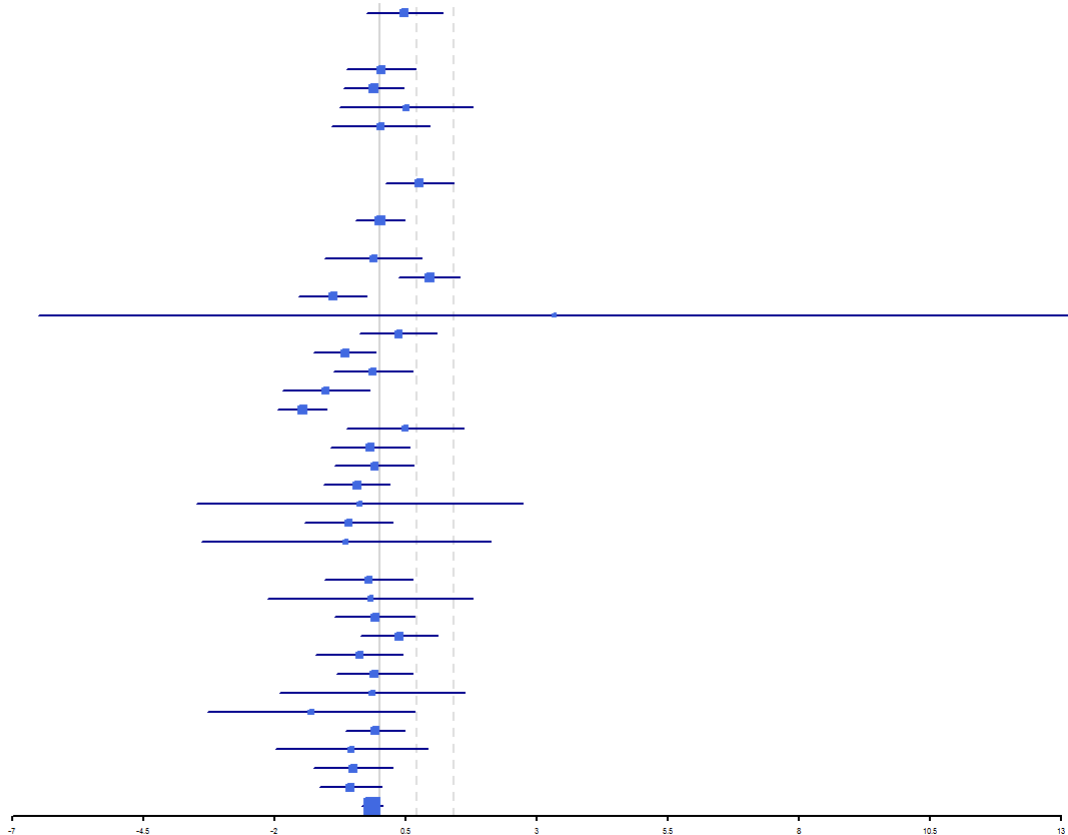

[Adolescents]

### Full Surface Area OCD vs HC. (I2= 23.51 )

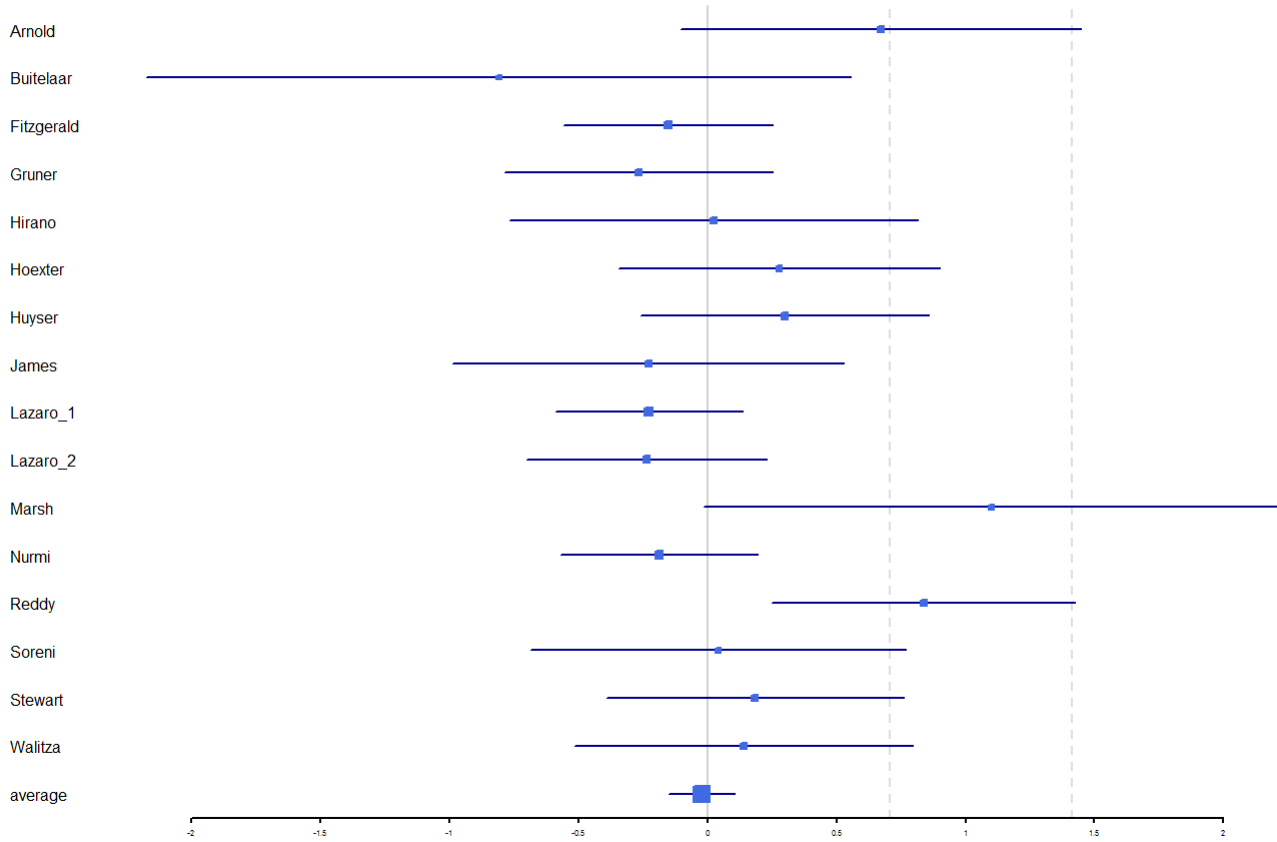

### Full Surface Area ADHD vs HC. (I2= 17.92 )

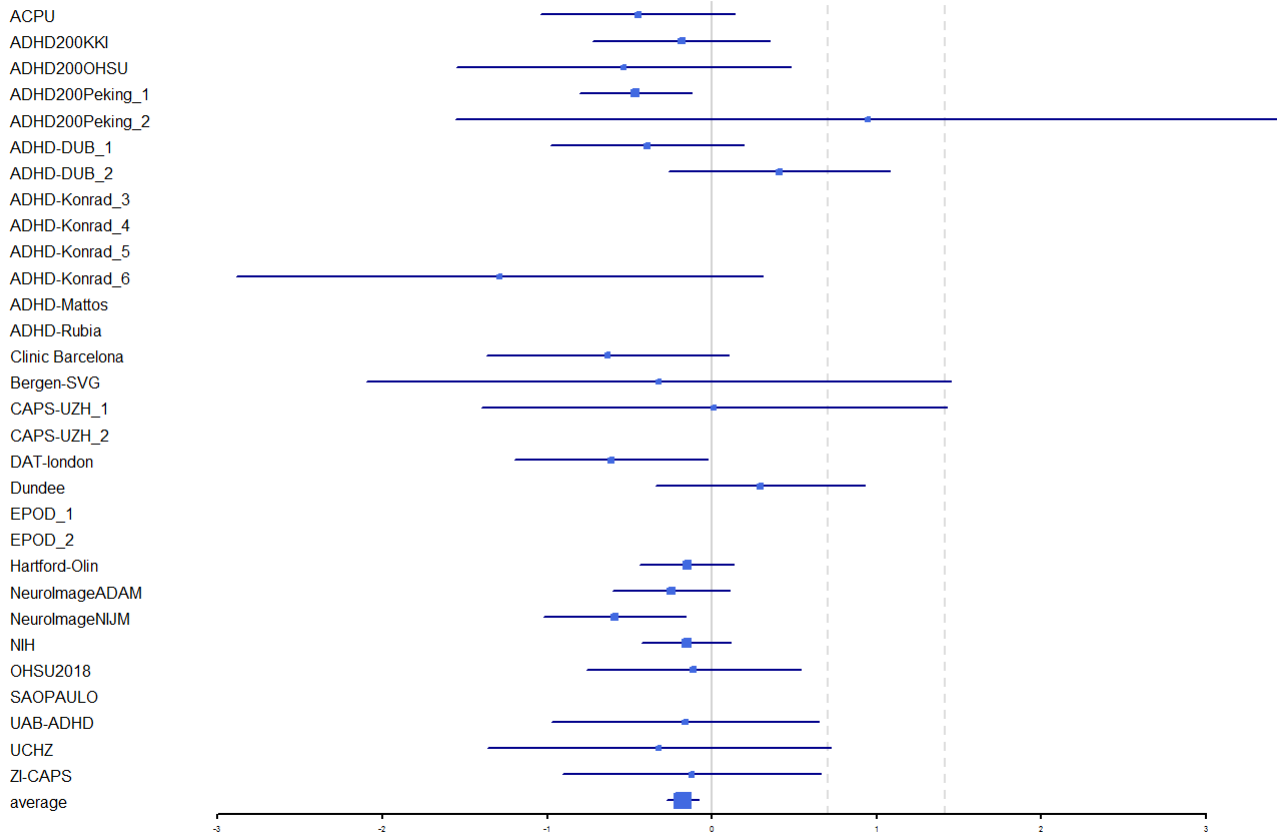

[Adolescents]

### Full Surface Area ASD vs HC. (I2= 73.19 )

NIJMEGEN\_1-1  
NIJMEGEN\_1-2  
NIJMEGEN\_3  
BRC  
PITT  
TORONTO  
FAIR  
ABIDE\_CALTECH  
ABIDE\_KKI  
ABIDE\_LEUVEN\_2  
ABIDE\_MAX\_MUN  
ABIDE\_NYU  
ABIDE\_OHSU  
ABIDE\_OLIN  
ABIDE\_PITT  
ABIDE\_SDSU  
ABIDE\_STANFORD  
ABIDE\_TCD  
ABIDE\_UM\_1  
ABIDE\_UM\_2  
ABIDE\_USM  
ABIDE\_YALE  
UMCU\_1  
UMCU\_2  
TCD  
PHGGM  
ABIDEII-ETH\_1  
ABIDEII-GU\_1  
ABIDEII-IP\_1  
ABIDEII-IU\_1  
ABIDEII-KKI\_1  
ABIDEII-NYU\_1  
ABIDEII-OHSU\_1  
ABIDEII-SDSU\_1  
ABIDEII-TCD\_1  
ABIDEII-UCD\_1  
ABIDEII-UCLA\_1  
ABIDEII-USM\_1  
TORONTO  
SAOPAULO  
PITT  
Barcelona  
average

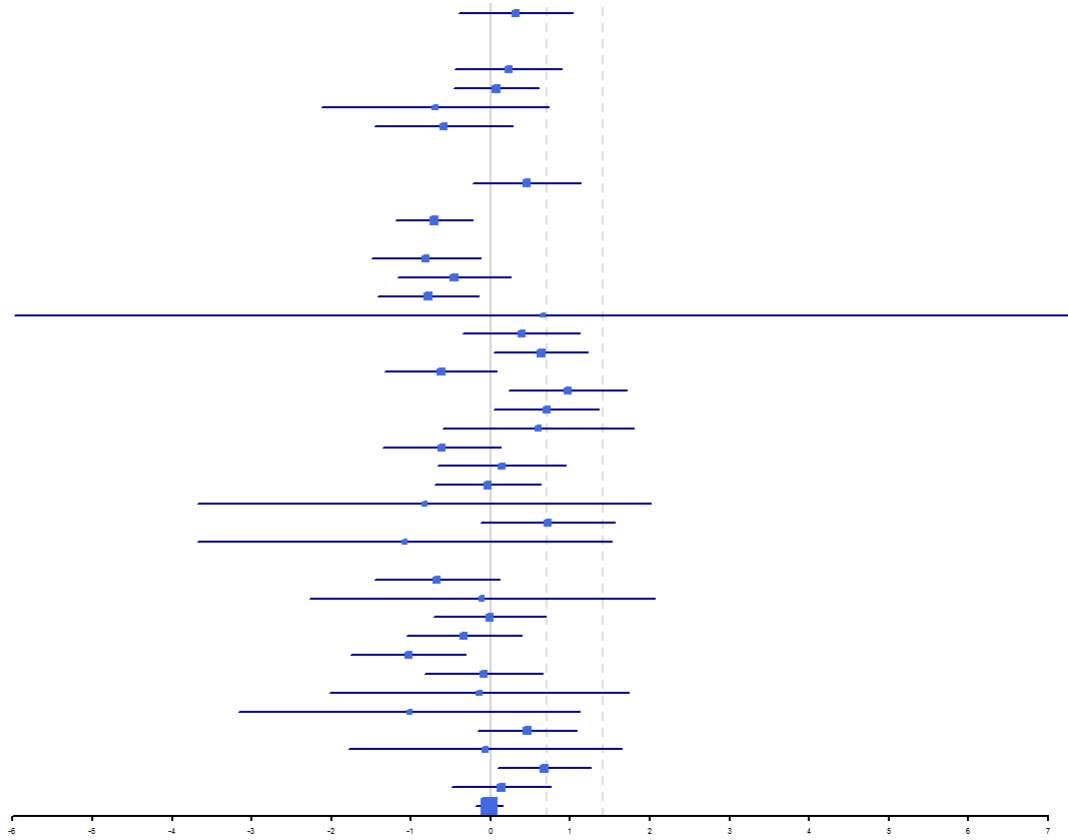

### Intracranial Volume OCD vs HC. (I2= 16.4 )

Arnold  
Buitelaar  
Fitzgerald  
Gruner  
Hirano  
Hoexter  
Huyser  
James  
Lazaro\_1  
Lazaro\_2  
Marsh  
Nurmi  
Reddy  
Soreni  
Stewart  
Walitza  
average

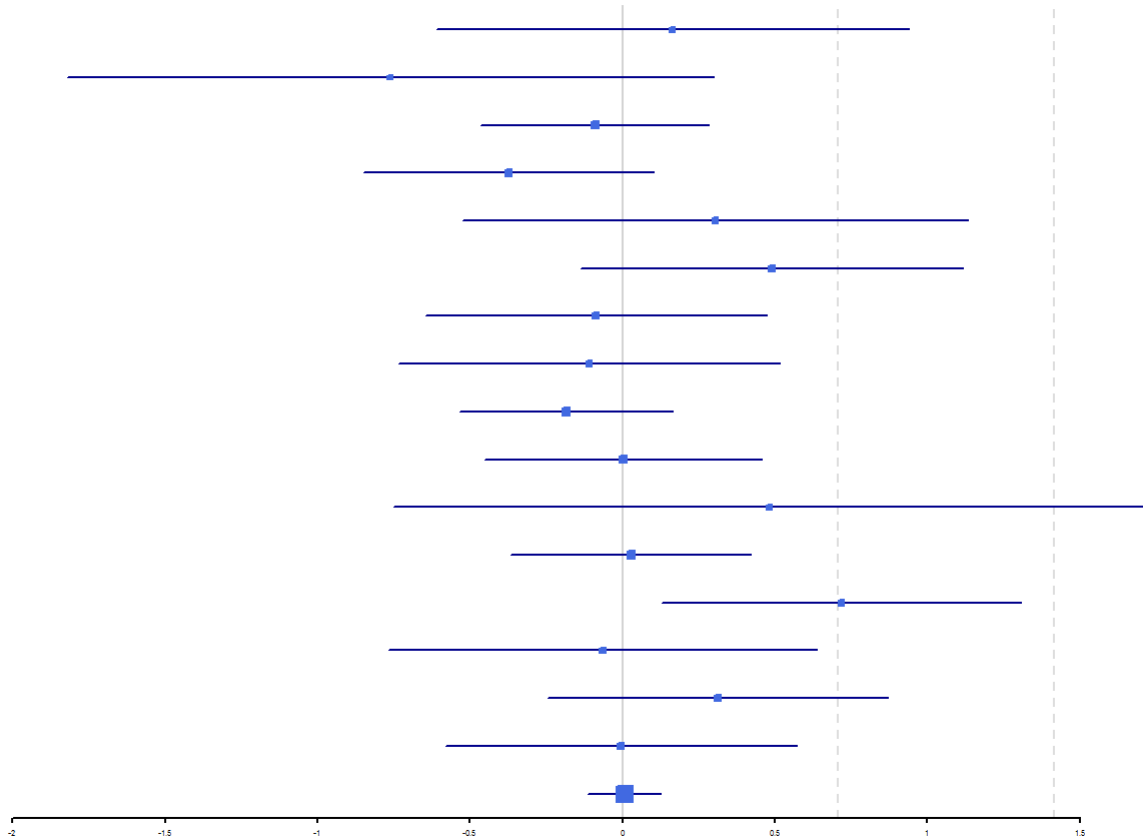

[Adolescents]

### Intracranial Volume ADHD vs HC. (I2= 17.11 )

- ACPU
- ADHD200KKI
- ADHD200OHSU
- ADHD200Peking\_1
- ADHD200Peking\_2
- ADHD-DUB\_1
- ADHD-DUB\_2
- ADHD-Konrad\_3
- ADHD-Konrad\_4
- ADHD-Konrad\_5
- ADHD-Konrad\_6
- ADHD-Mattos
- ADHD-Rubia
- Clinic Barcelona
- Bergen-SVG
- CAPS-UZH\_1
- CAPS-UZH\_2
- DAT-london
- Dundee
- EPOD\_1
- EPOD\_2
- Hartford-Olin
- NeuroImageADAM
- NeuroImageNIJM
- NIH
- OHSU2018
- SAOPAULO
- UAB-ADHD
- UCHZ
- ZI-CAPS
- average

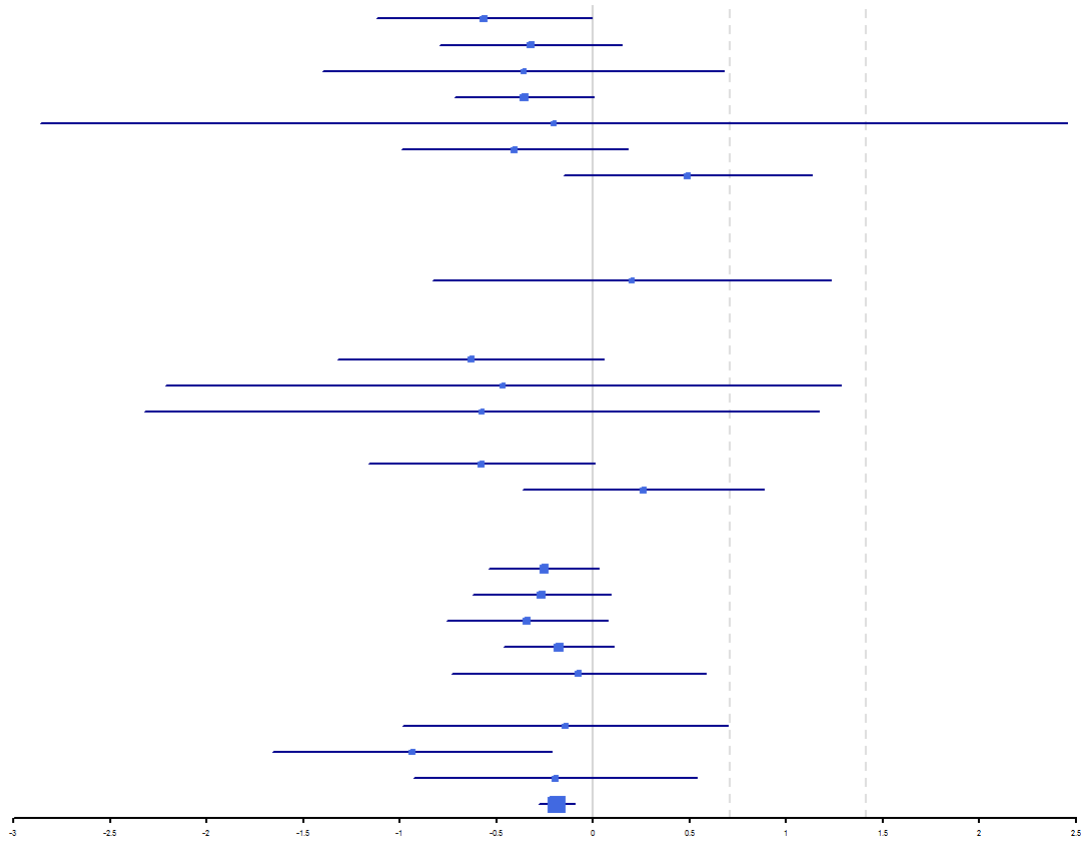

### Intracranial Volume ASD vs HC. (I2= 49.34 )

- NIJMEGEN\_1-1
- NIJMEGEN\_1-2
- NIJMEGEN\_3
- BRC
- PITT
- TORONTO
- FAIR
- ABIDE\_CALTECH
- ABIDE\_KKI
- ABIDE\_LEUVEN\_2
- ABIDE\_MAX\_MUN
- ABIDE\_NYU
- ABIDE\_OHSU
- ABIDE\_OLIN
- ABIDE\_PITT
- ABIDE\_SDSU
- ABIDE\_STANFORD
- ABIDE\_TCD
- ABIDE\_UM\_1
- ABIDE\_UM\_2
- ABIDE\_USM
- ABIDE\_YALE
- UMCU\_1
- UMCU\_2
- TCD
- PHGGM
- ABIDEII-ETH\_1
- ABIDEII-GU\_1
- ABIDEII-IP\_1
- ABIDEII-IU\_1
- ABIDEII-KKI\_1
- ABIDEII-NYU\_1
- ABIDEII-OHSU\_1
- ABIDEII-SDSU\_1
- ABIDEII-TCD\_1
- ABIDEII-UCD\_1
- ABIDEII-UCLA\_1
- ABIDEII-USM\_1
- TORONTO
- SAOPAULO
- PITT
- Barcelona
- average

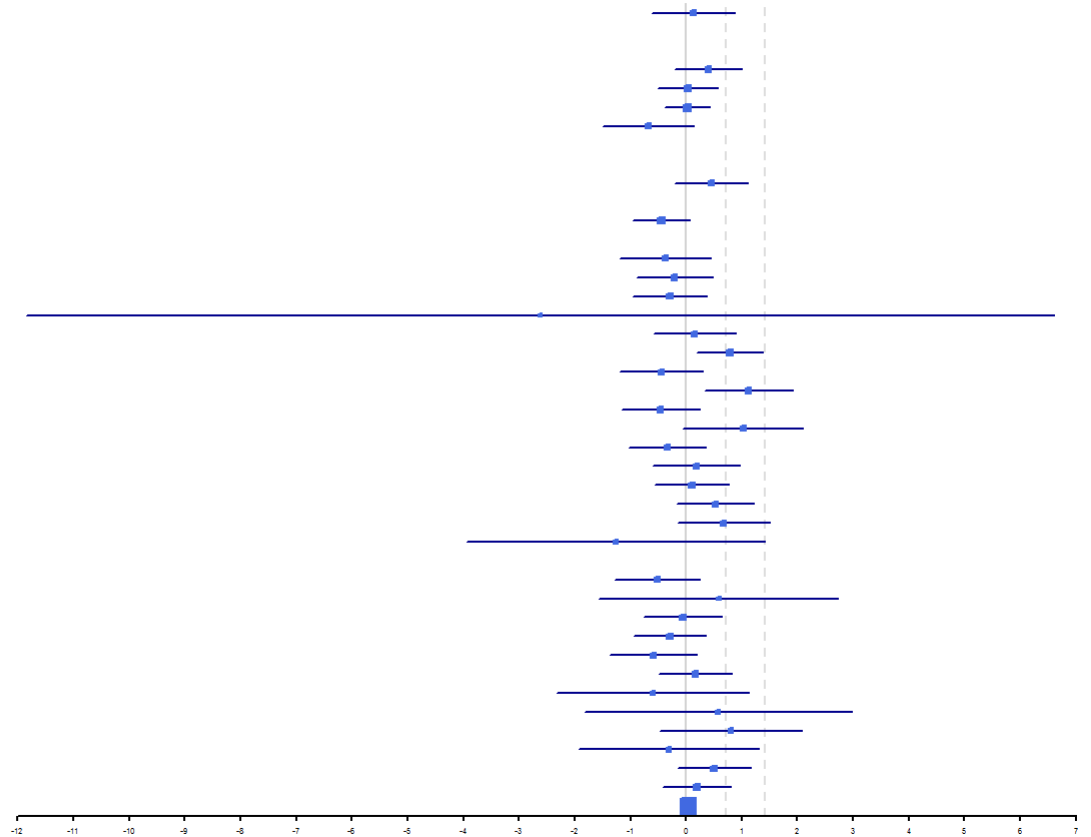



# Crossdisorder: forestplots

## Forest plots Adults

Forest plots are generated by running the standard regression model of each z-scored MRI feature  $x$  ( $y \sim x + \text{Age} + \text{Sex}$ ) again, for each site independently. Output are effect sizes and 95% confidence interval per feature.

[Adults]

### Mean Thalamus OCD vs HC. (I2= 54.16 )

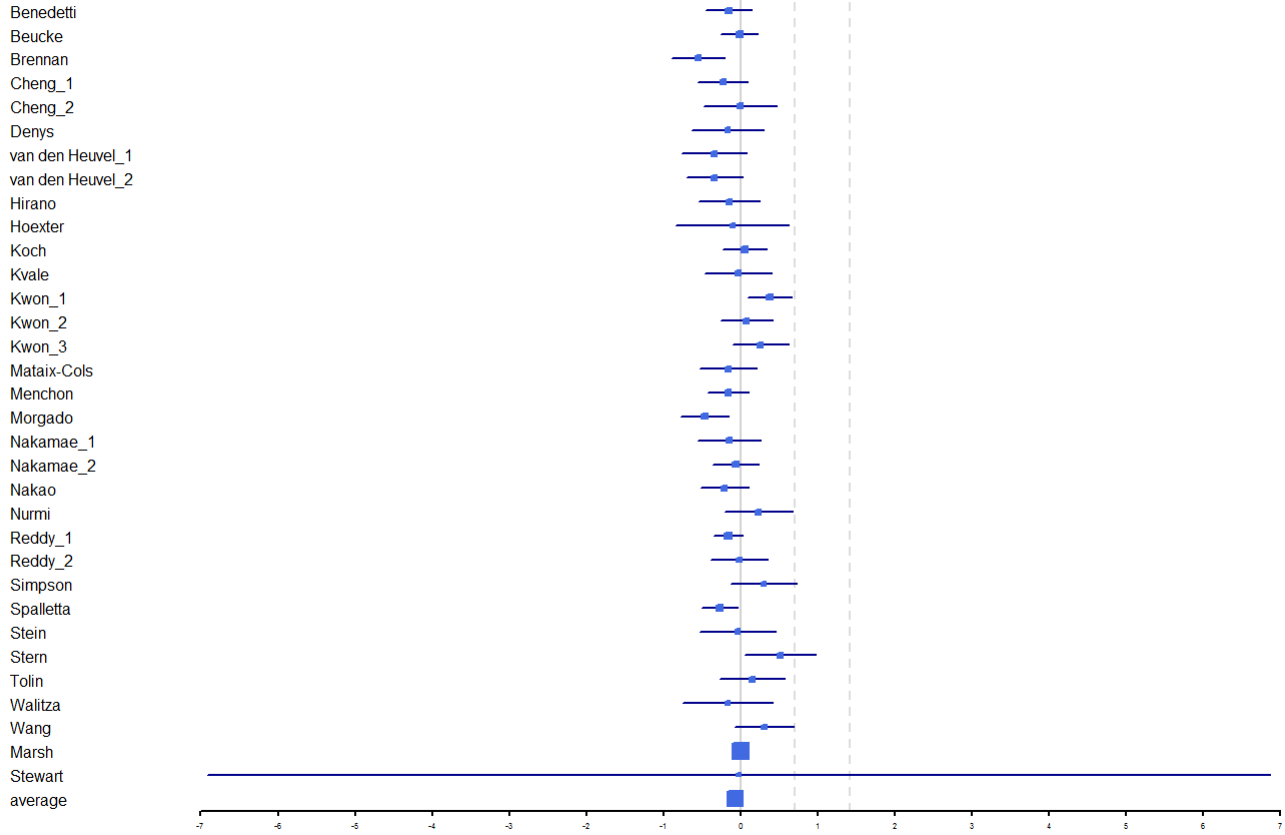

### Mean Thalamus ADHD vs HC. (I2= 21.66 )

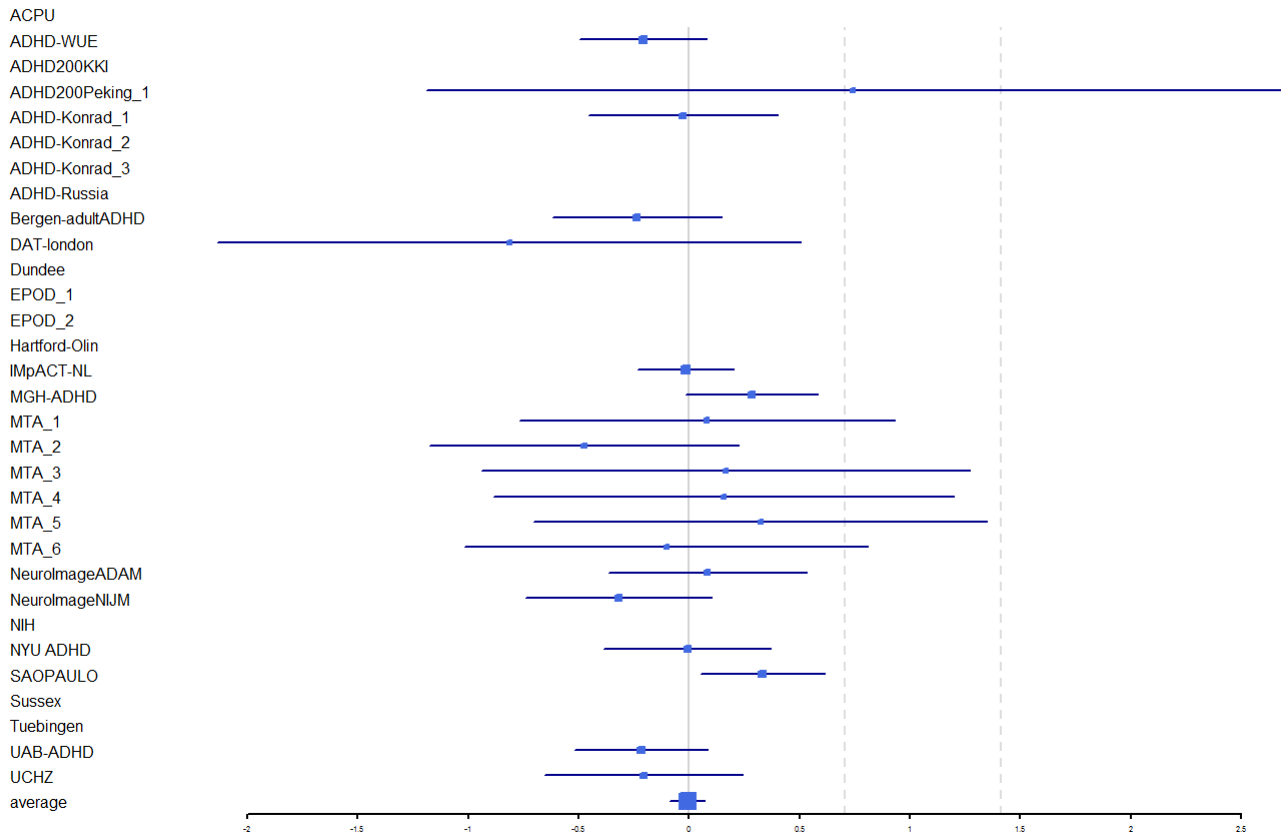

[Adults]

### Mean Thalamus ASD vs HC. (I2= 54.55 )

- NIJMEGEN\_1-1
- NIJMEGEN\_1-2
- NIJMEGEN\_2
- MRC
- BRC
- PITT
- CMU
- TORONTO
- FRANKFURT
- ABIDE\_CALTECH
- ABIDE\_LEUVEN\_1
- ABIDE\_MAX\_MUN
- ABIDE\_NYU
- ABIDE\_OLIN
- ABIDE\_PITT
- ABIDE\_SBL
- ABIDE\_SDSU
- ABIDE\_TCD
- ABIDE\_UM\_1
- ABIDE\_UM\_2
- ABIDE\_USM
- UMCU\_1
- UMCU\_2
- TCD
- PHGGM
- ABIDEII-BNL\_1
- ABIDEII-ETH\_1
- ABIDEII-HP\_1
- ABIDEII-IU\_1
- ABIDEII-KUL
- ABIDEII-NYU\_1
- ABIDEII-OILH\_2
- ABIDEII-SDSU\_1
- ABIDEII-TCD\_1
- ABIDEII-USM\_1
- TORONTO
- SAOPAULO
- PITT
- Dresden
- average

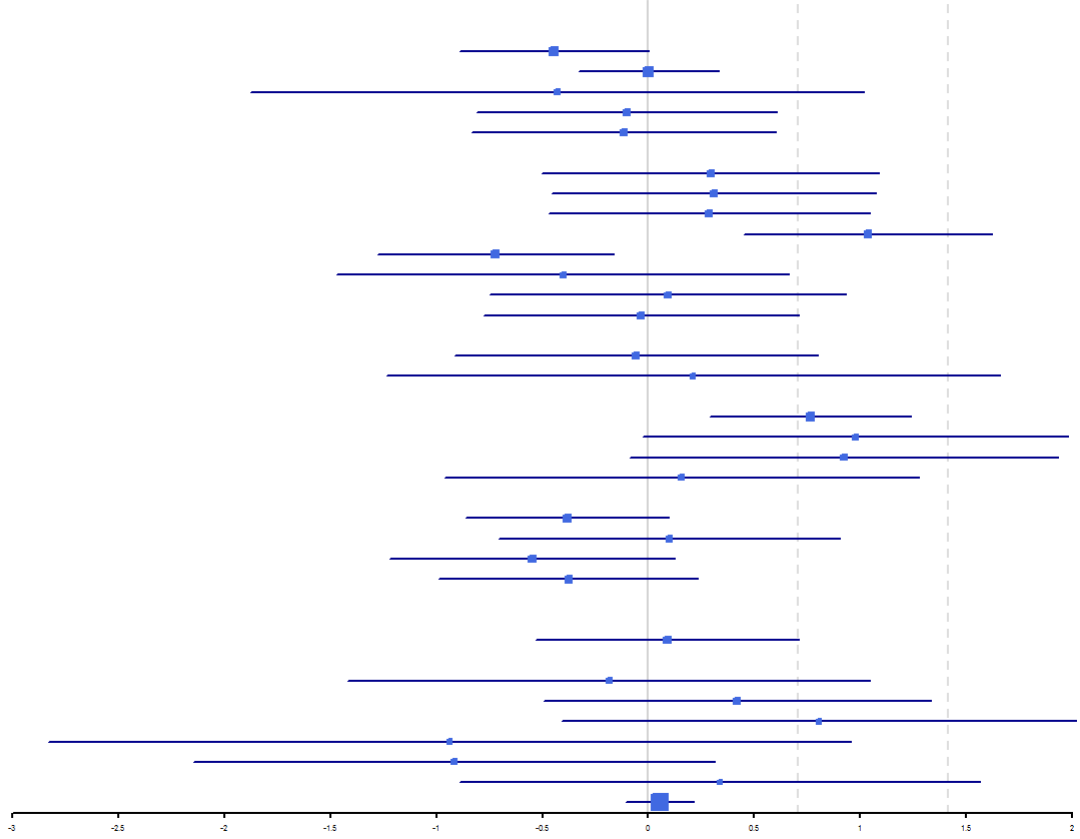

### Mean Putamen OCD vs HC. (I2= 44.12 )

- Benedetti
- Beucke
- Brennan
- Cheng\_1
- Cheng\_2
- Denys
- van den Heuvel\_1
- van den Heuvel\_2
- Hirano
- Hoexter
- Koch
- Kvale
- Kwon\_1
- Kwon\_2
- Kwon\_3
- Mataix-Cols
- Menchon
- Morgado
- Nakamae\_1
- Nakamae\_2
- Nakao
- Nurmi
- Reddy\_1
- Reddy\_2
- Simpson
- Spalletta
- Stein
- Stern
- Tolin
- Walitza
- Wang
- Marsh
- Stewart
- average

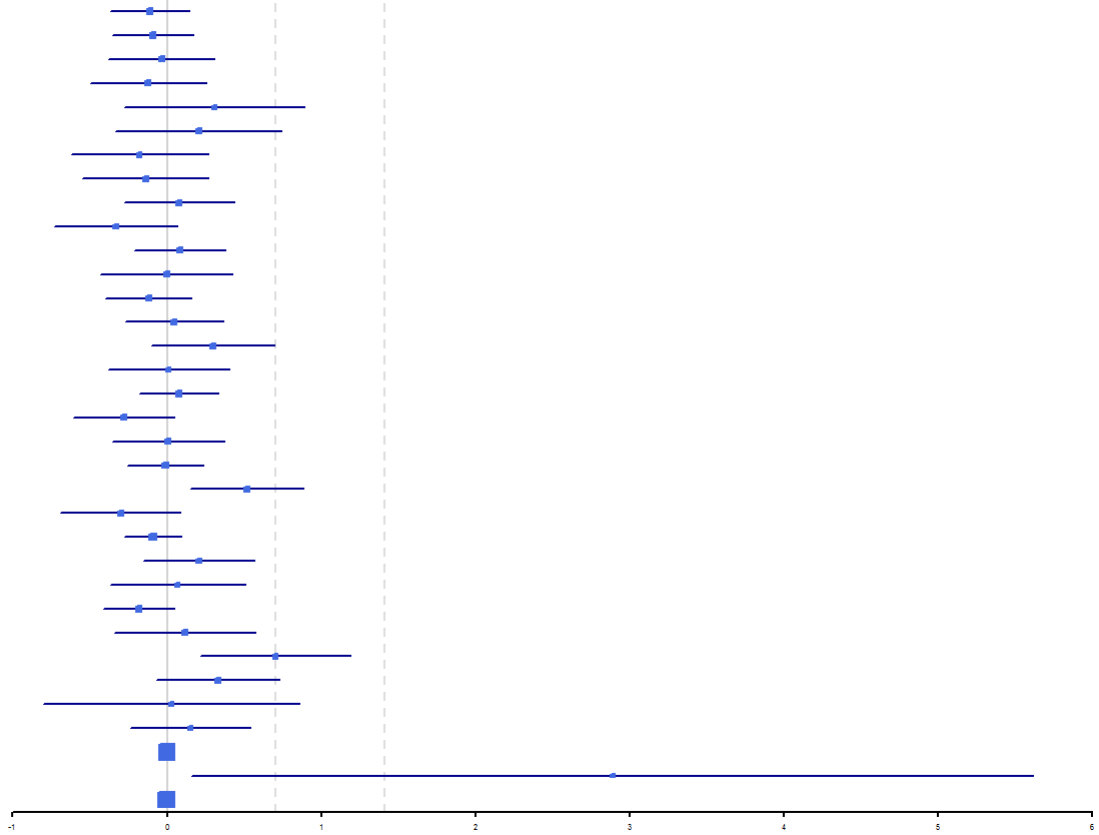

[Adults]

### Mean Putamen ADHD vs HC. (I2= 16.73 )

ACPU  
ADHD-WUE  
ADHD200KKI  
ADHD200Peking\_1  
ADHD-Konrad\_1  
ADHD-Konrad\_2  
ADHD-Konrad\_3  
ADHD-Russia  
Bergen-adultADHD  
DAT-london  
Dundee  
EPOD\_1  
EPOD\_2  
Hartford-Olin  
IMpACT-NL  
MGH-ADHD  
MTA\_1  
MTA\_2  
MTA\_3  
MTA\_4  
MTA\_5  
MTA\_6  
NeuroImageADAM  
NeuroImageNIJM  
NIH  
NYU ADHD  
SAOPAULO  
Sussex  
Tuebingen  
UAB-ADHD  
UCHZ  
average

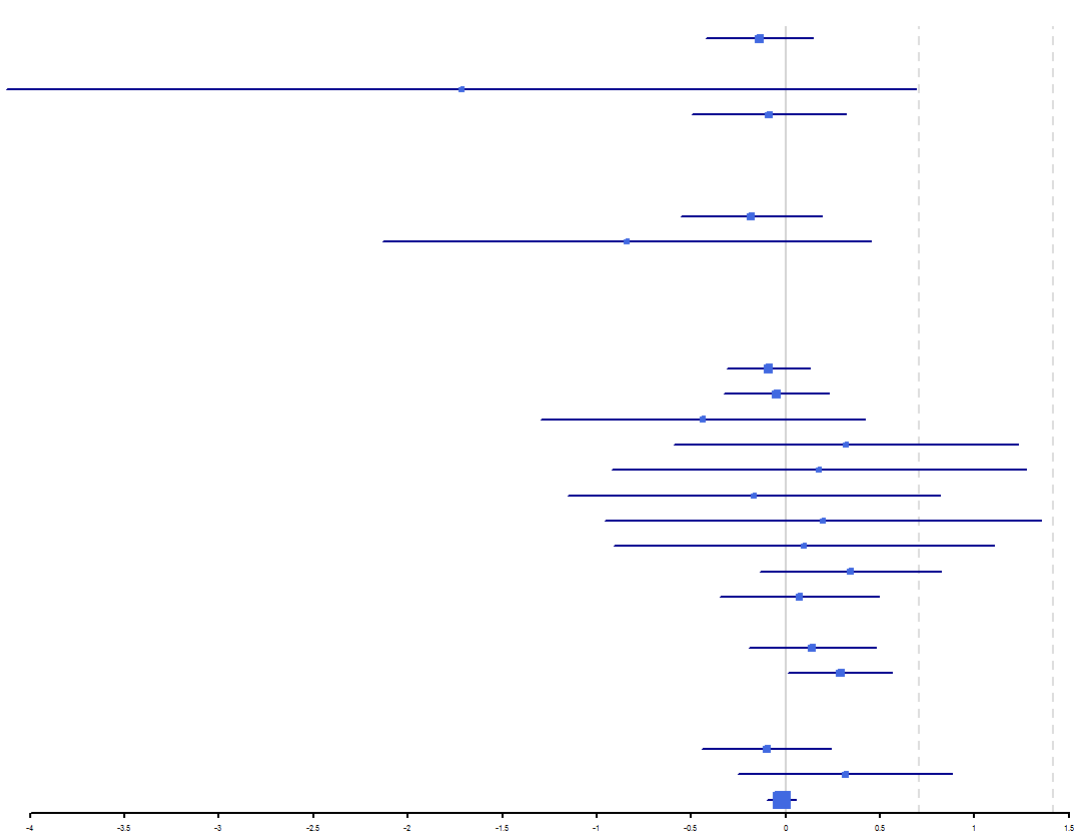

### Mean Putamen ASD vs HC. (I2= 94.14 )

NIJMEGEN\_1-1  
NIJMEGEN\_1-2  
NIJMEGEN\_2  
MRC  
BRC  
PITT  
CMU  
TORONTO  
FRANKFURT  
ABIDE\_CALTECH  
ABIDE\_LEUVEN\_1  
ABIDE\_MAX\_MUN  
ABIDE\_NYU  
ABIDE\_OLIN  
ABIDE\_PITT  
ABIDE\_SBL  
ABIDE\_SDSU  
ABIDE\_TCD  
ABIDE\_UM\_1  
ABIDE\_UM\_2  
ABIDE\_USM  
UMCU\_1  
UMCU\_2  
TCD  
PHGGM  
ABIDEII-BNI\_1  
ABIDEII-ETH\_1  
ABIDEII-IP\_1  
ABIDEII-IU\_1  
ABIDEII-KUL  
ABIDEII-NYU\_1  
ABIDEII-OILH\_2  
ABIDEII-SDSU\_1  
ABIDEII-TCD\_1  
ABIDEII-USM\_1  
TORONTO  
SAOPAULO  
PITT  
Dresden  
average

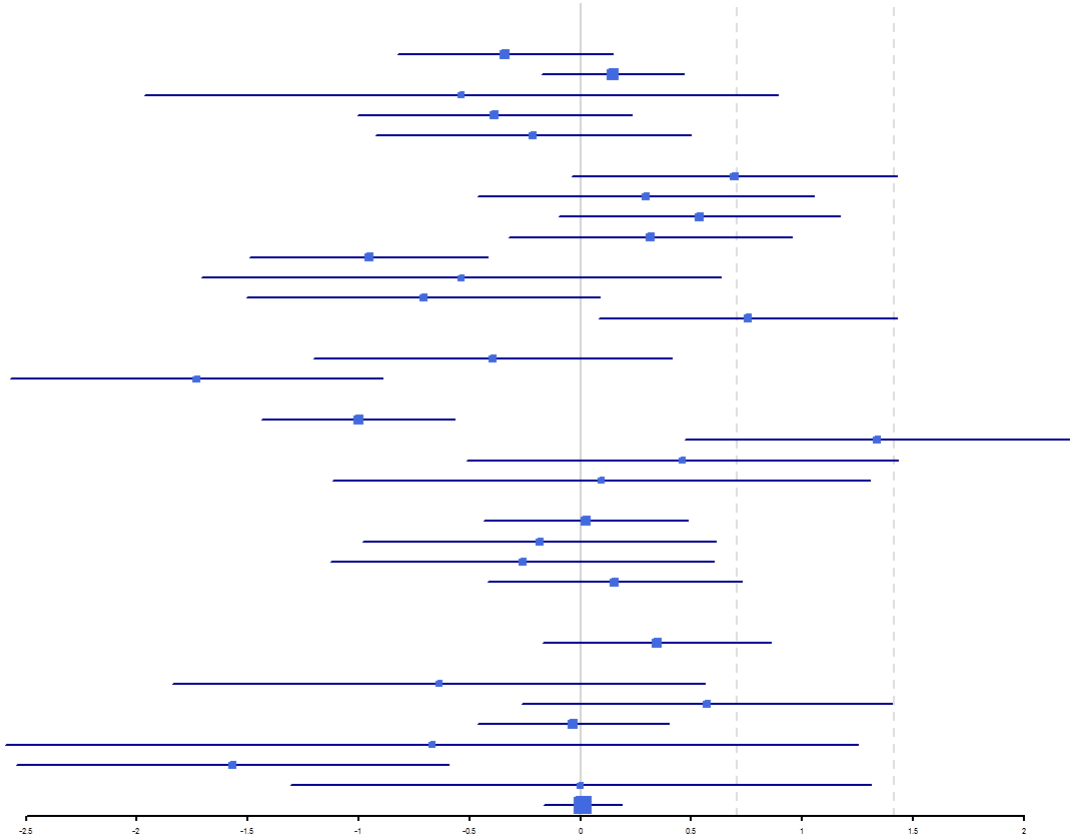

[Adults]

### Mean Hippocampus OCD vs HC. (I2= 49.1 )

Benedetti  
Beucke  
Brennan  
Cheng\_1  
Cheng\_2  
Denys  
van den Heuvel\_1  
van den Heuvel\_2  
Hirano  
Hoexter  
Koch  
Kvale  
Kwon\_1  
Kwon\_2  
Kwon\_3  
Mataix-Cols  
Menchon  
Morgado  
Nakamae\_1  
Nakamae\_2  
Nakao  
Nurmi  
Reddy\_1  
Reddy\_2  
Simpson  
Spalletta  
Stein  
Stern  
Tolin  
Walitza  
Wang  
Marsh  
Stewart  
average

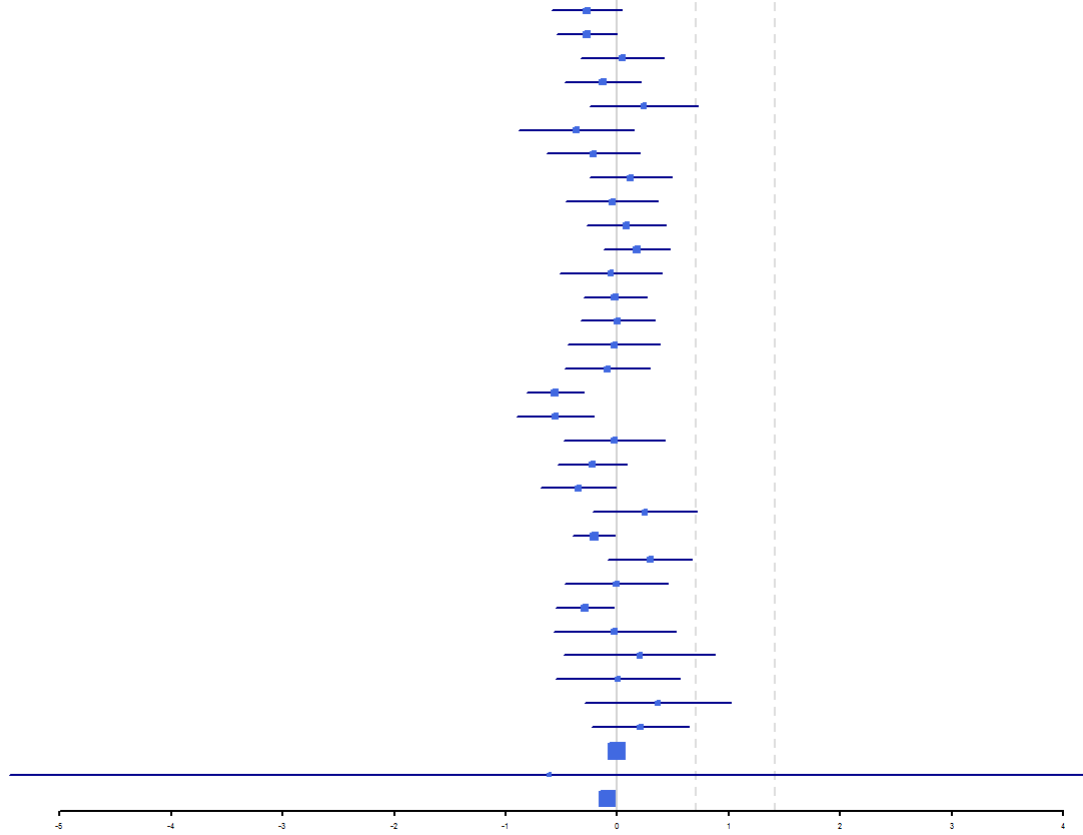

### Mean Hippocampus ADHD vs HC. (I2= 19.22 )

ACPU  
ADHD-WUE  
ADHD200KKI  
ADHD200Peking\_1  
ADHD-Konrad\_1  
ADHD-Konrad\_2  
ADHD-Konrad\_3  
ADHD-Russia  
Bergen-adultADHD  
DAT-london  
Dundee  
EPOD\_1  
EPOD\_2  
Hartford-Olin  
IMpACT-NL  
MGH-ADHD  
MTA\_1  
MTA\_2  
MTA\_3  
MTA\_4  
MTA\_5  
MTA\_6  
NeuroImageADAM  
NeuroImageNIJ  
NIH  
NYU ADHD  
SAOPAULO  
Sussex  
Tuebingen  
UAB-ADHD  
UCHZ  
average

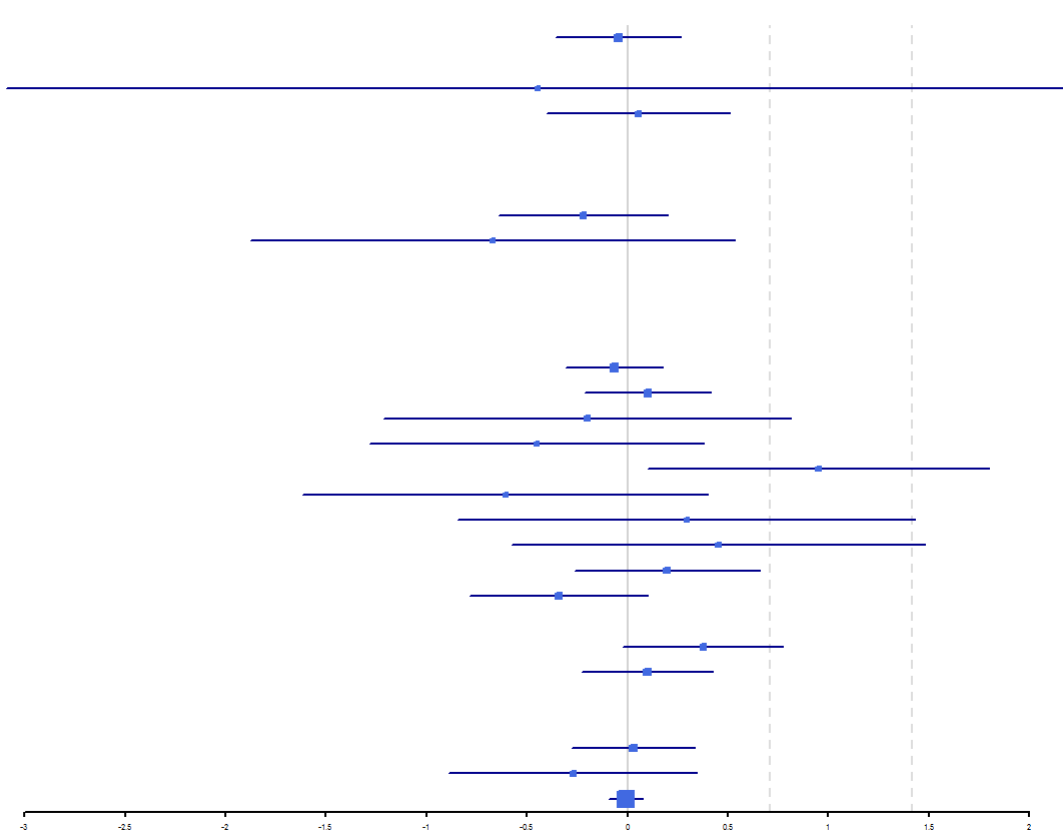

[Adults]

### Mean Hippocampus ASD vs HC. (I2= 44.61 )

NIJMEGEN\_1-1  
NIJMEGEN\_1-2  
NIJMEGEN\_2  
MRC  
BRC  
PITT  
CMU  
TORONTO  
FRANKFURT  
ABIDE\_CALTECH  
ABIDE\_LEUVEN\_1  
ABIDE\_MAX\_MUN  
ABIDE\_NYU  
ABIDE\_OLIN  
ABIDE\_PITT  
ABIDE\_SBL  
ABIDE\_SDSU  
ABIDE\_TCD  
ABIDE\_UM\_1  
ABIDE\_UM\_2  
ABIDE\_USM  
UMCU\_1  
UMCU\_2  
TCD  
PHGGM  
ABIDEII-BNI\_1  
ABIDEII-ETH\_1  
ABIDEII-IP\_1  
ABIDEII-IU\_1  
ABIDEII-KUL  
ABIDEII-NYU\_1  
ABIDEII-OILH\_2  
ABIDEII-SDSU\_1  
ABIDEII-TCD\_1  
ABIDEII-USM\_1  
TORONTO  
SAOPAULO  
PITT  
Dresden  
average

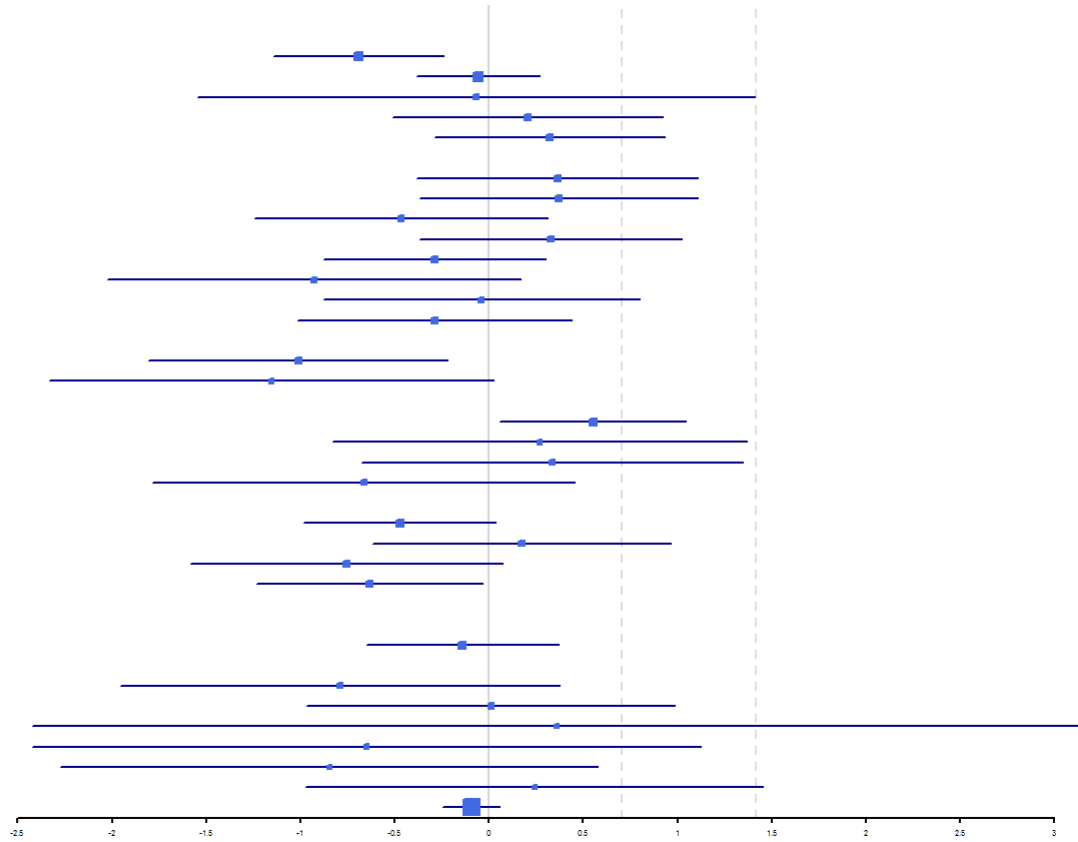

### Mean Amygdala OCD vs HC. (I2= 32.08 )

Benedetti  
Beucke  
Brennan  
Cheng\_1  
Cheng\_2  
Denys  
van den Heuvel\_1  
van den Heuvel\_2  
Hirano  
Hoexter  
Koch  
Kvale  
Kwon\_1  
Kwon\_2  
Kwon\_3  
Mataix-Cols  
Menchon  
Morgado  
Nakamae\_1  
Nakamae\_2  
Nakao  
Nurmi  
Reddy\_1  
Reddy\_2  
Simpson  
Spalletta  
Stein  
Stern  
Tolin  
Walitza  
Wang  
Marsh  
Stewart  
average

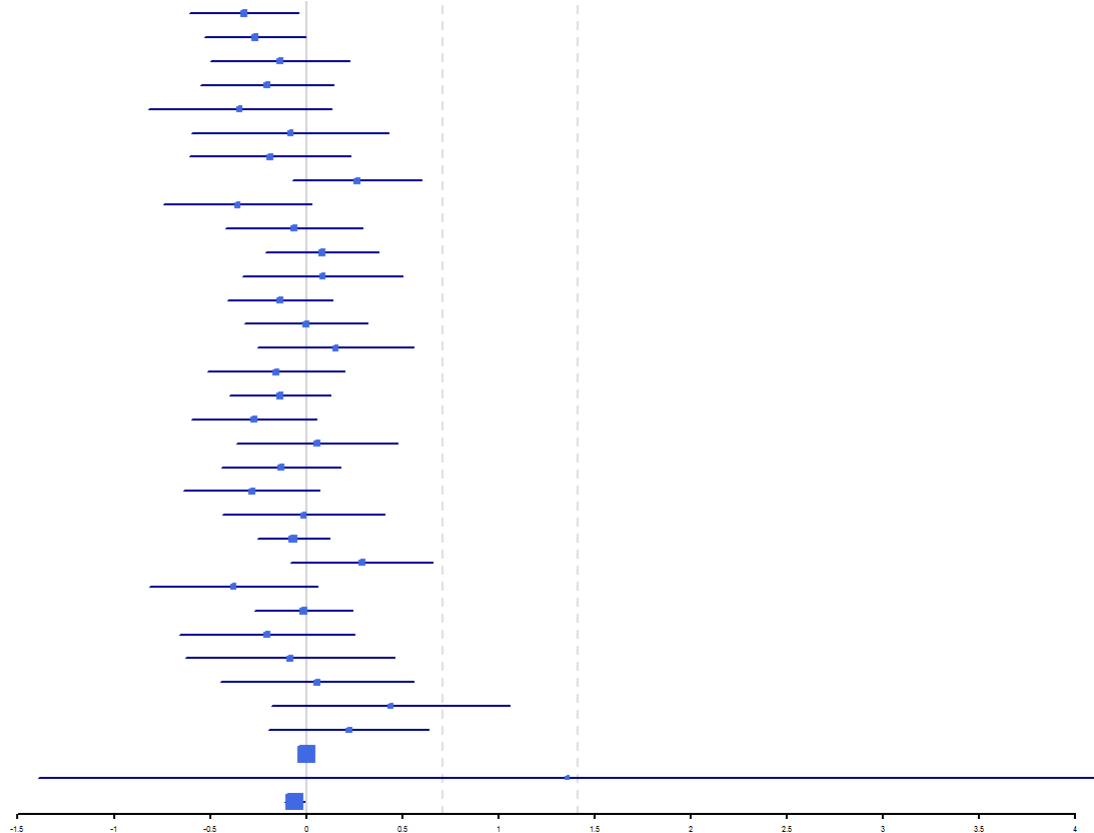

[Adults]

### Mean Amygdala ADHD vs HC. (I2= 19.46 )

ACPU  
ADHD-WUE  
ADHD200KKI  
ADHD200Peking\_1  
ADHD-Konrad\_1  
ADHD-Konrad\_2  
ADHD-Konrad\_3  
ADHD-Russia  
Bergen-adultADHD  
DAT-london  
Dundee  
EPOD\_1  
EPOD\_2  
Hartford-Olin  
IMpACT-NL  
MGH-ADHD  
MTA\_1  
MTA\_2  
MTA\_3  
MTA\_4  
MTA\_5  
MTA\_6  
NeuroImageADAM  
NeuroImageNIJM  
NIH  
NYU ADHD  
SAOPAULO  
Sussex  
Tuebingen  
UAB-ADHD  
UCHZ  
average

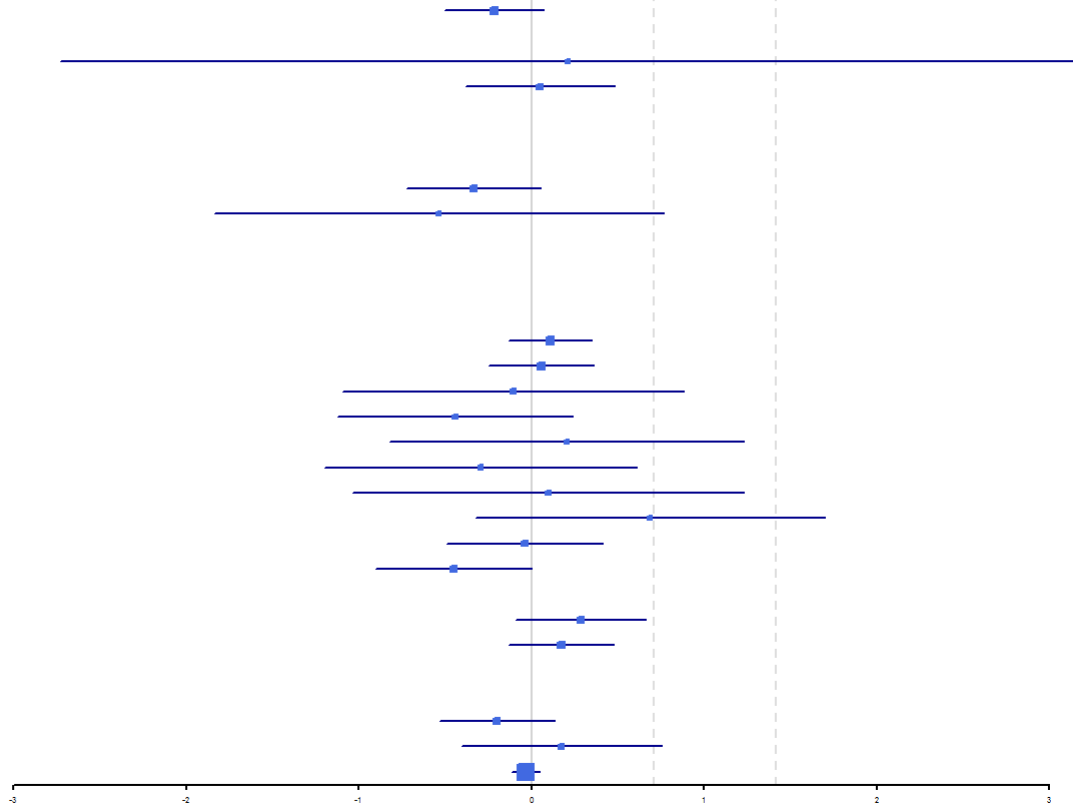

### Mean Amygdala ASD vs HC. (I2= 92.54 )

NIJMEGEN\_1-1  
NIJMEGEN\_1-2  
NIJMEGEN\_2  
MRC  
BRC  
PITT  
CMU  
TORONTO  
FRANKFURT  
ABIDE\_CALTECH  
ABIDE\_LEUVEN\_1  
ABIDE\_MAX\_MUN  
ABIDE\_NYU  
ABIDE\_OLIN  
ABIDE\_PITT  
ABIDE\_SBL  
ABIDE\_SDSU  
ABIDE\_TCD  
ABIDE\_UM\_1  
ABIDE\_UM\_2  
ABIDE\_USM  
UMCU\_1  
UMCU\_2  
TCD  
PHGGM  
ABIDEII-BNI\_1  
ABIDEII-ETH\_1  
ABIDEII-IP\_1  
ABIDEII-IU\_1  
ABIDEII-KUL  
ABIDEII-NYU\_1  
ABIDEII-OILH\_2  
ABIDEII-SDSU\_1  
ABIDEII-TCD\_1  
ABIDEII-USM\_1  
TORONTO  
SAOPAULO  
PITT  
Dresden  
average

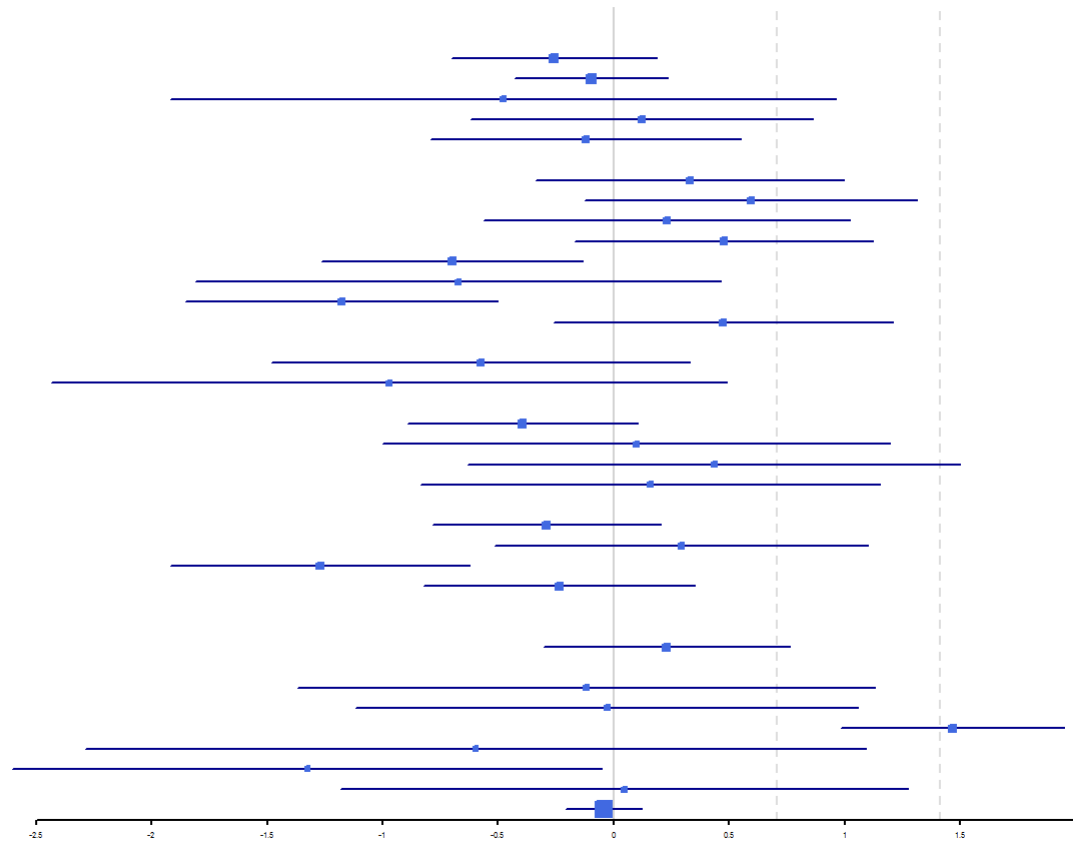

[Adults]

### Mean Thickness Orbitofrontal OCD vs HC. (I2= 32.02 )

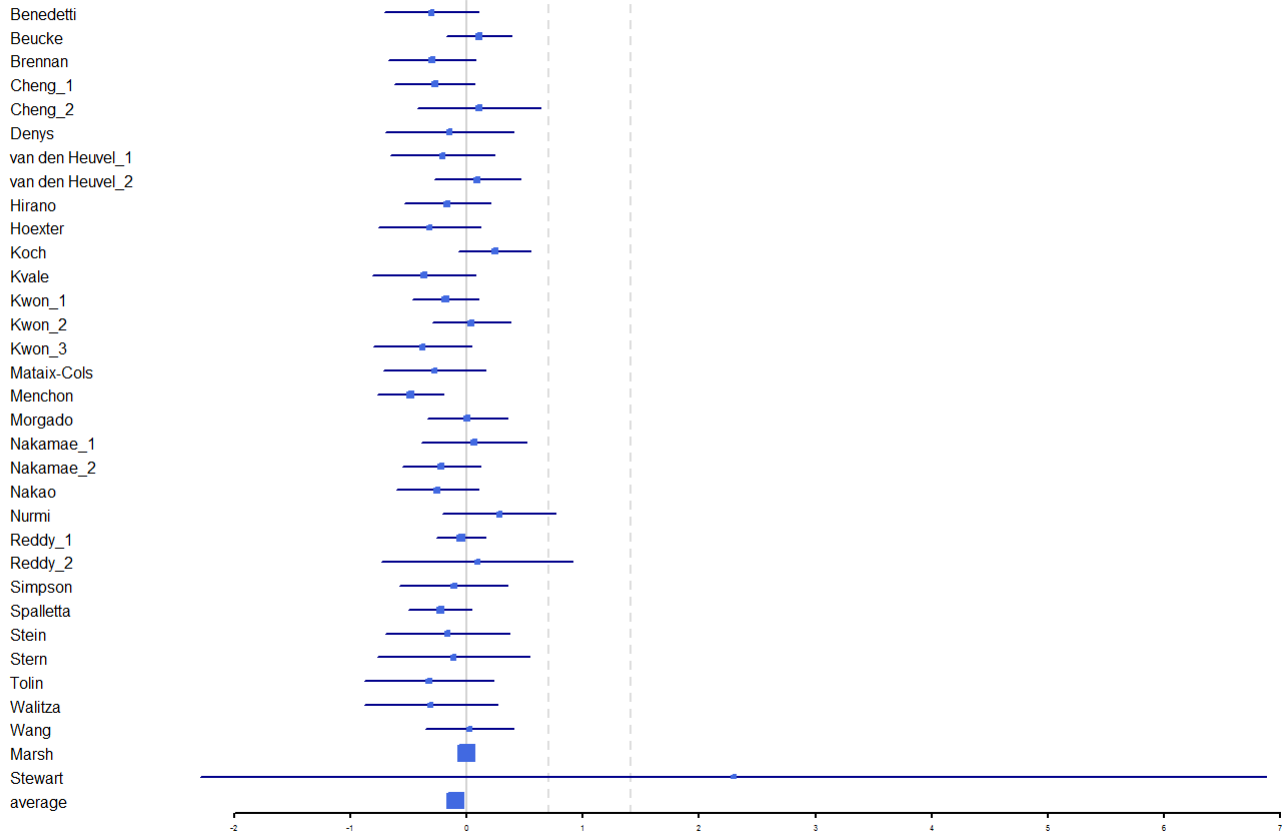

### Mean Thickness Orbitofrontal ADHD vs HC. (I2= 28.59 )

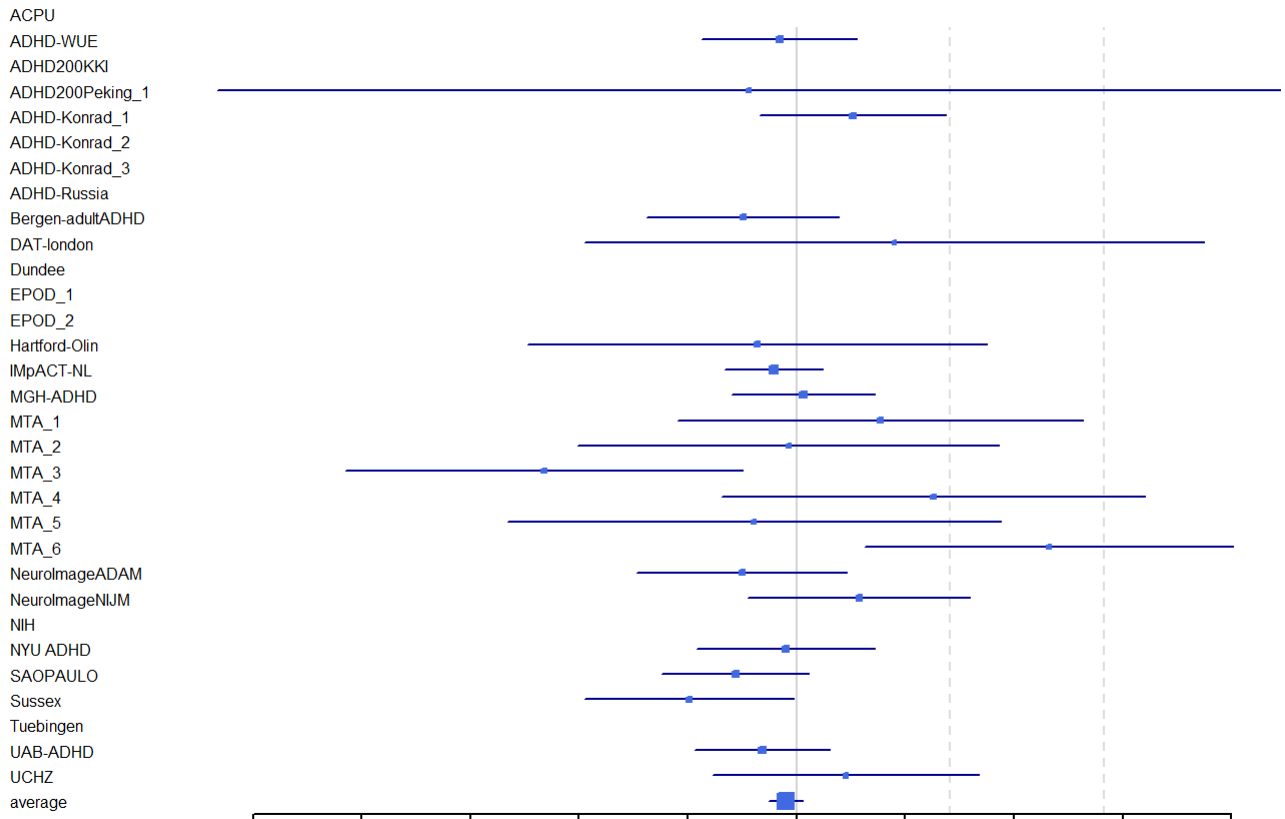



[Adults]

### Mean Thickness Orbitofrontal ASD vs HC. (I2= 48.02 )

NIJMEGEN\_1-1  
NIJMEGEN\_1-2  
NIJMEGEN\_2  
MRC  
BRC  
PITT  
CMU  
TORONTO  
FRANKFURT  
ABIDE\_CALTECH  
ABIDE\_LEUVEN\_1  
ABIDE\_MAX\_MUN  
ABIDE\_NYU  
ABIDE\_OLIN  
ABIDE\_PITT  
ABIDE\_SBL  
ABIDE\_SDSU  
ABIDE\_TCD  
ABIDE\_UM\_1  
ABIDE\_UM\_2  
ABIDE\_USM  
UMCU\_1  
UMCU\_2  
TCD  
PHGGM  
ABIDEII-BNI\_1  
ABIDEII-ETH\_1  
ABIDEII-IP\_1  
ABIDEII-IU\_1  
ABIDEII-KUL  
ABIDEII-NYU\_1  
ABIDEII-OILH\_2  
ABIDEII-SDSU\_1  
ABIDEII-TCD\_1  
ABIDEII-USM\_1  
TORONTO  
SAOPAULO  
PITT  
Dresden  
average

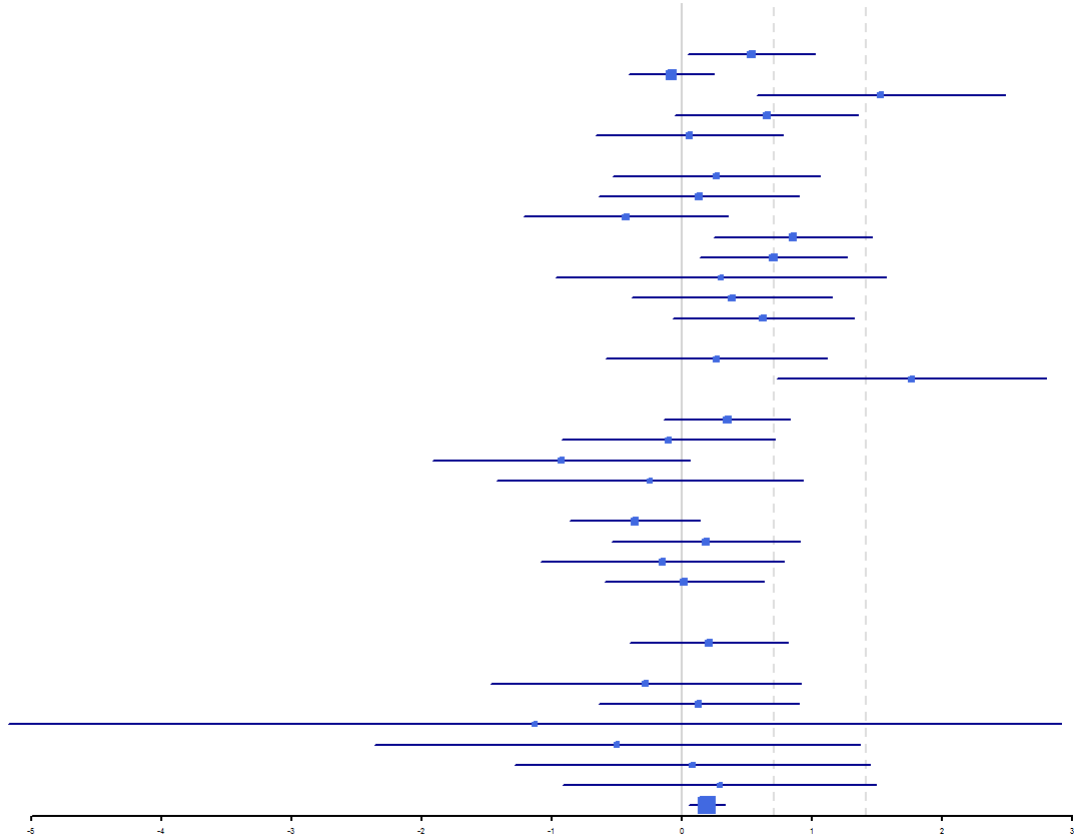

### Mean Thickness Pars Triangularis OCD vs HC. (I2= 65.91 )

Benedetti  
Beucke  
Brennan  
Cheng\_1  
Cheng\_2  
Denys  
van den Heuvel\_1  
van den Heuvel\_2  
Hirano  
Hoexter  
Koch  
Kvale  
Kwon\_1  
Kwon\_2  
Kwon\_3  
Mataix-Cols  
Menchon  
Morgado  
Nakamae\_1  
Nakamae\_2  
Nakao  
Nurmi  
Reddy\_1  
Reddy\_2  
Simpson  
Spalletta  
Stein  
Stern  
Tolin  
Walitza  
Wang  
Marsh  
Stewart  
average

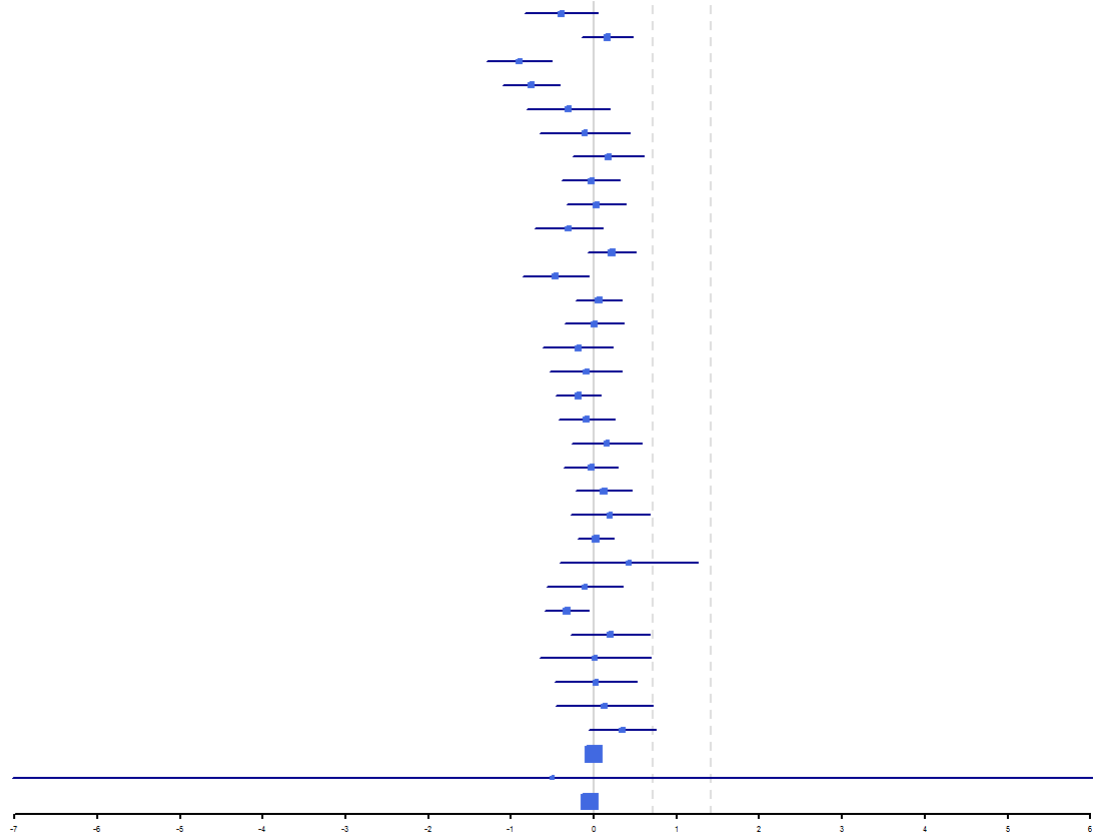

[Adults]

### Mean Thickness Pars Triangularis ADHD vs HC. (I2= 20.63 )

ACPU  
ADHD-WUE  
ADHD200KKI  
ADHD200Peking\_1  
ADHD-Konrad\_1  
ADHD-Konrad\_2  
ADHD-Konrad\_3  
ADHD-Russia  
Bergen-adultADHD  
DAT-london  
Dundee  
EPOD\_1  
EPOD\_2  
Hartford-Olin  
IMpACT-NL  
MGH-ADHD  
MTA\_1  
MTA\_2  
MTA\_3  
MTA\_4  
MTA\_5  
MTA\_6  
NeuroImageADAM  
NeuroImageNIJM  
NIH  
NYU ADHD  
SAOPAULO  
Sussex  
Tuebingen  
UAB-ADHD  
UCHZ  
average

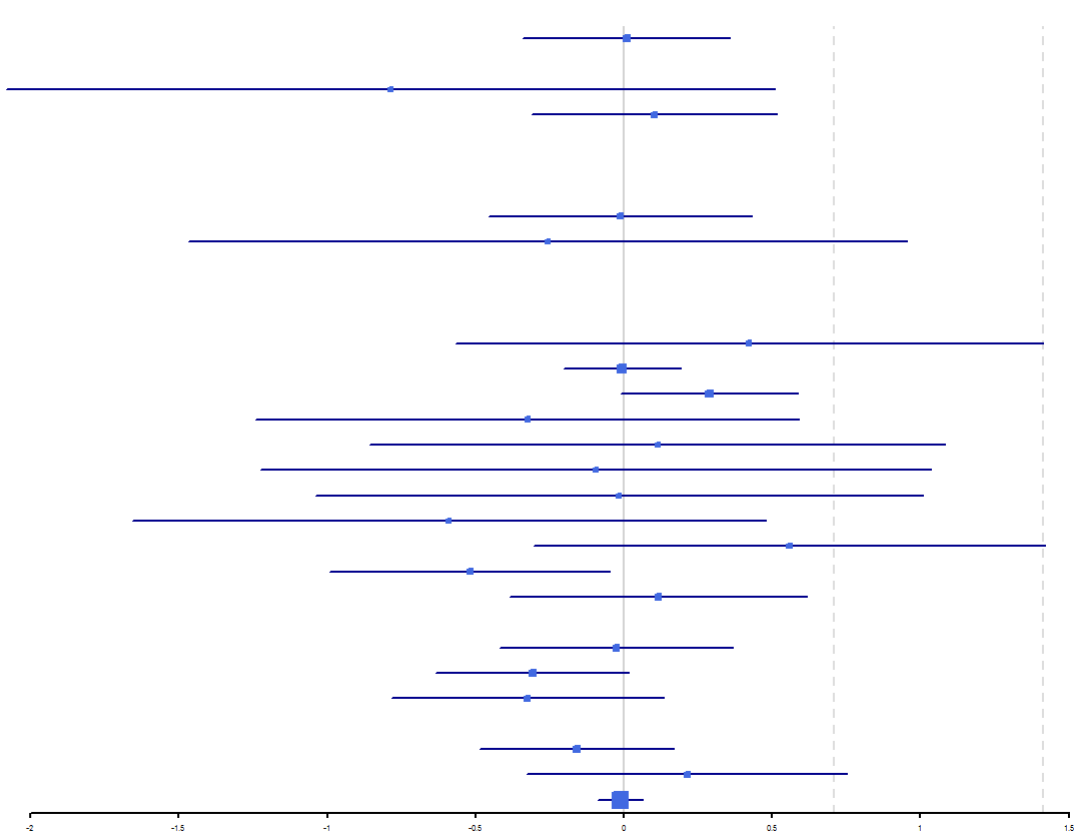

### Mean Thickness Pars Triangularis ASD vs HC. (I2= 31.91 )

NIJMEGEN\_1-1  
NIJMEGEN\_1-2  
NIJMEGEN\_2  
MRC  
BRC  
PITT  
CMU  
TORONTO  
FRANKFURT  
ABIDE\_CALTECH  
ABIDE\_LEUVEN\_1  
ABIDE\_MAX\_MUN  
ABIDE\_NYU  
ABIDE\_OLIN  
ABIDE\_PITT  
ABIDE\_SBL  
ABIDE\_SDSU  
ABIDE\_TCD  
ABIDE\_UM\_1  
ABIDE\_UM\_2  
ABIDE\_USM  
UMCU\_1  
UMCU\_2  
TCD  
PHGGM  
ABIDEII-BNI\_1  
ABIDEII-ETH\_1  
ABIDEII-IP\_1  
ABIDEII-IU\_1  
ABIDEII-KUL  
ABIDEII-NYU\_1  
ABIDEII-OILH\_2  
ABIDEII-SDSU\_1  
ABIDEII-TCD\_1  
ABIDEII-USM\_1  
TORONTO  
SAOPAULO  
PITT  
Dresden  
average

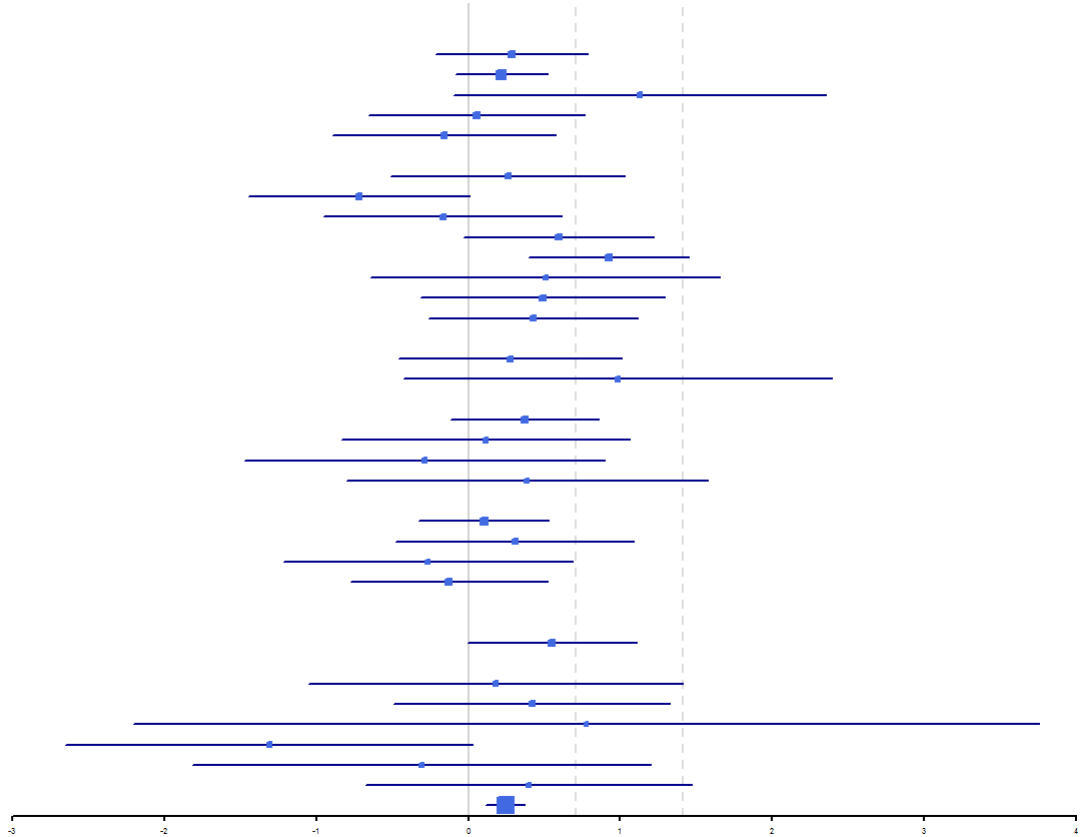

[Adults]

### Mean Thickness Poserior Cingulate OCD vs HC. (I2= 31.62 )

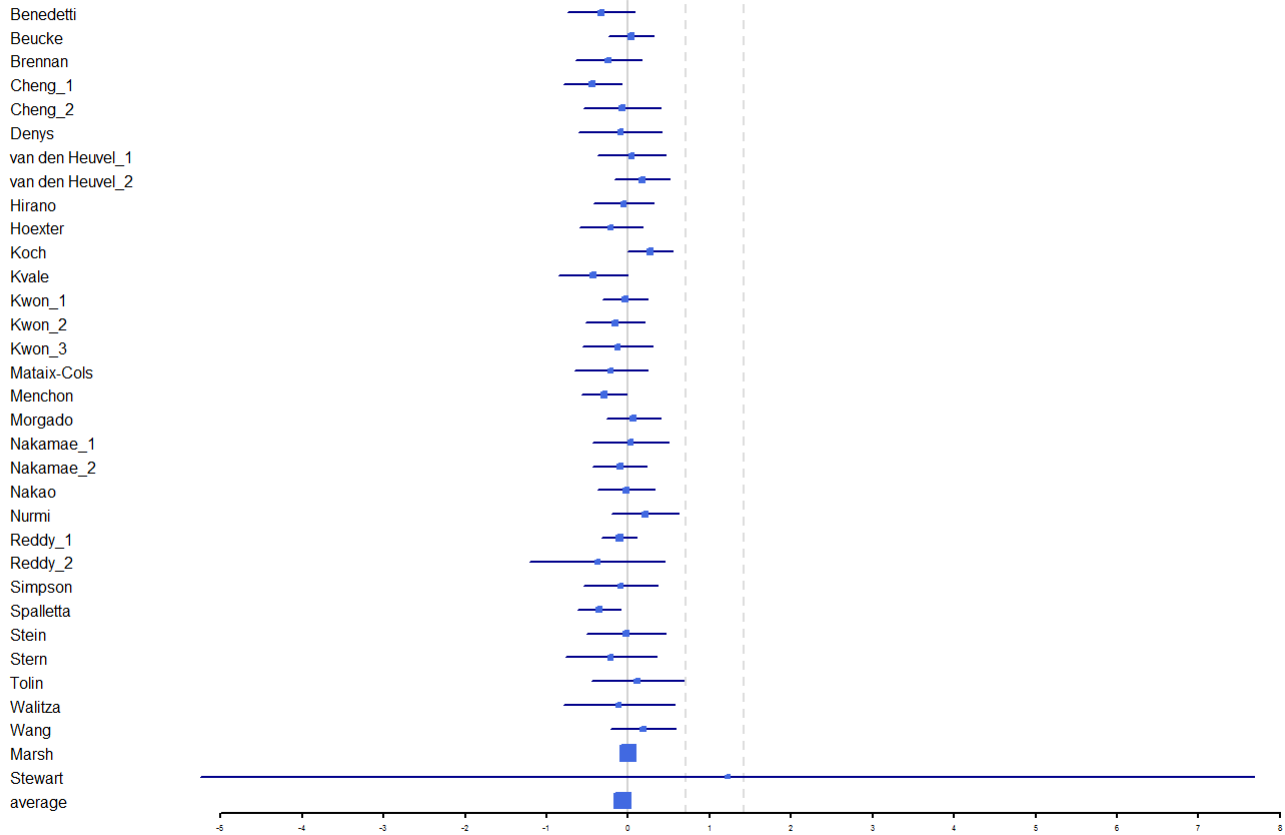

### Mean Thickness Poserior Cingulate ADHD vs HC. (I2= 23.72 )

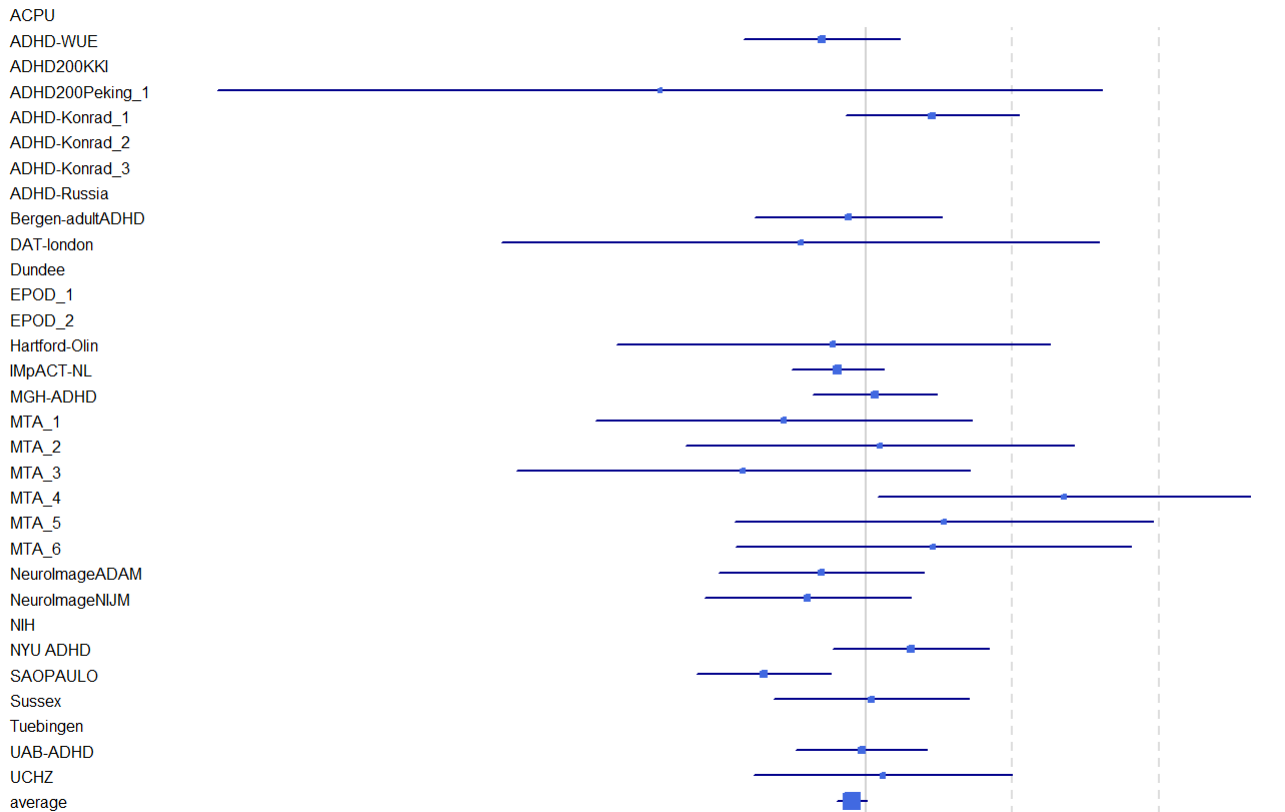

[Adults]

### Mean Thickness Poserior Cingulate ASD vs HC. (I2= 41.47 )

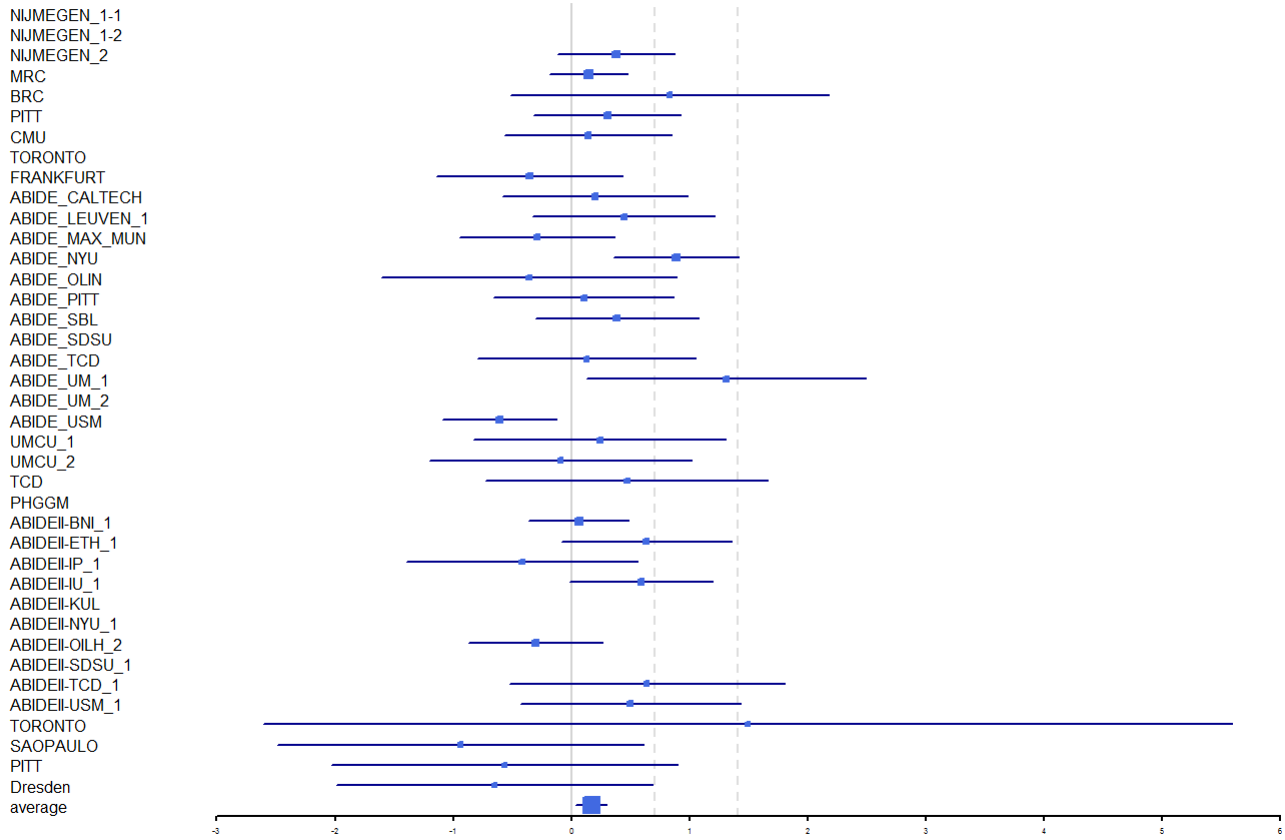

### Mean Cortical Thickness OCD vs HC. (I2= 73.93 )

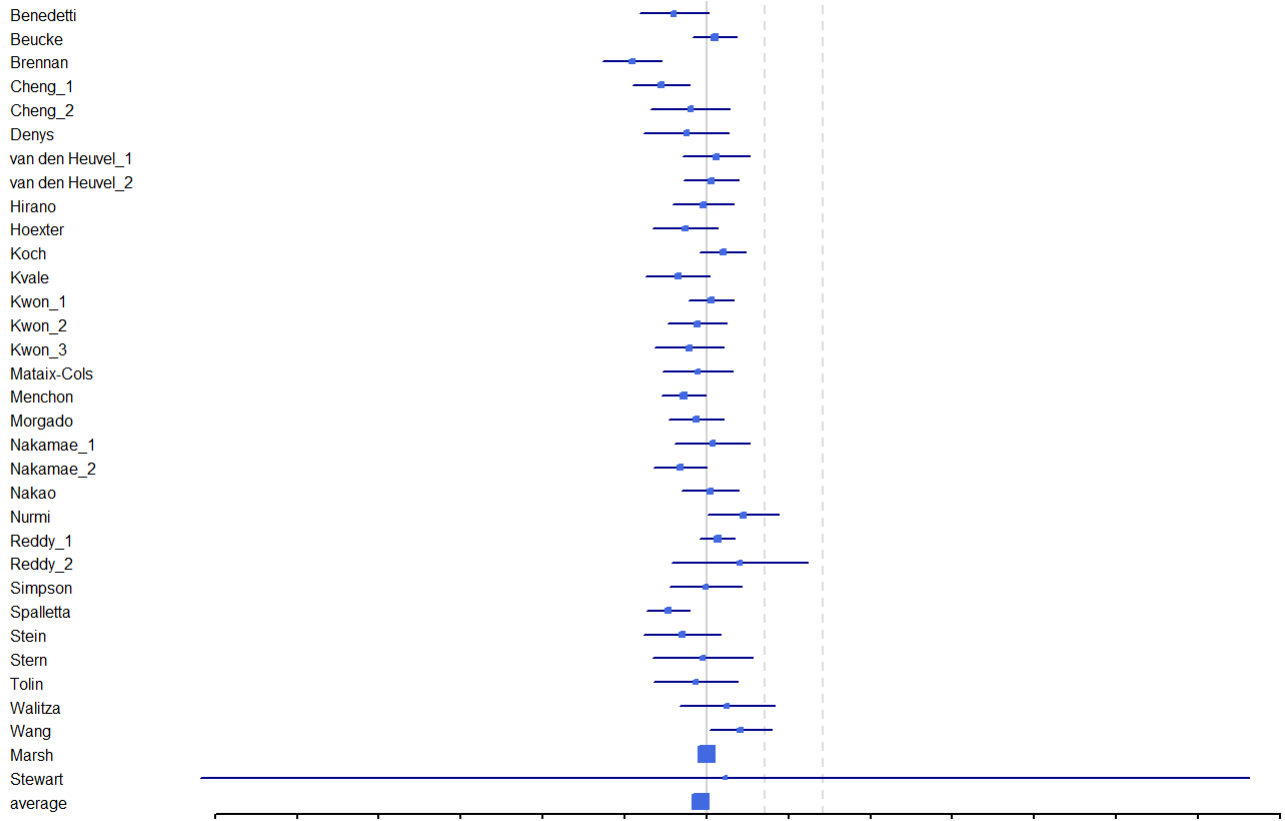

[Adults]

### Mean Cortical Thickness ADHD vs HC. (I2= 22.53 )

- ACPU
- ADHD-WUE
- ADHD200KKI
- ADHD200Peking\_1
- ADHD-Konrad\_1
- ADHD-Konrad\_2
- ADHD-Konrad\_3
- ADHD-Russia
- Bergen-adultADHD
- DAT-london
- Dundee
- EPOD\_1
- EPOD\_2
- Hartford-Olin
- IMpACT-NL
- MGH-ADHD
- MTA\_1
- MTA\_2
- MTA\_3
- MTA\_4
- MTA\_5
- MTA\_6
- NeuroImageADAM
- NeuroImageNIJM
- NIH
- NYU ADHD
- SAOPAULO
- Sussex
- Tuebingen
- UAB-ADHD
- UCHZ
- average

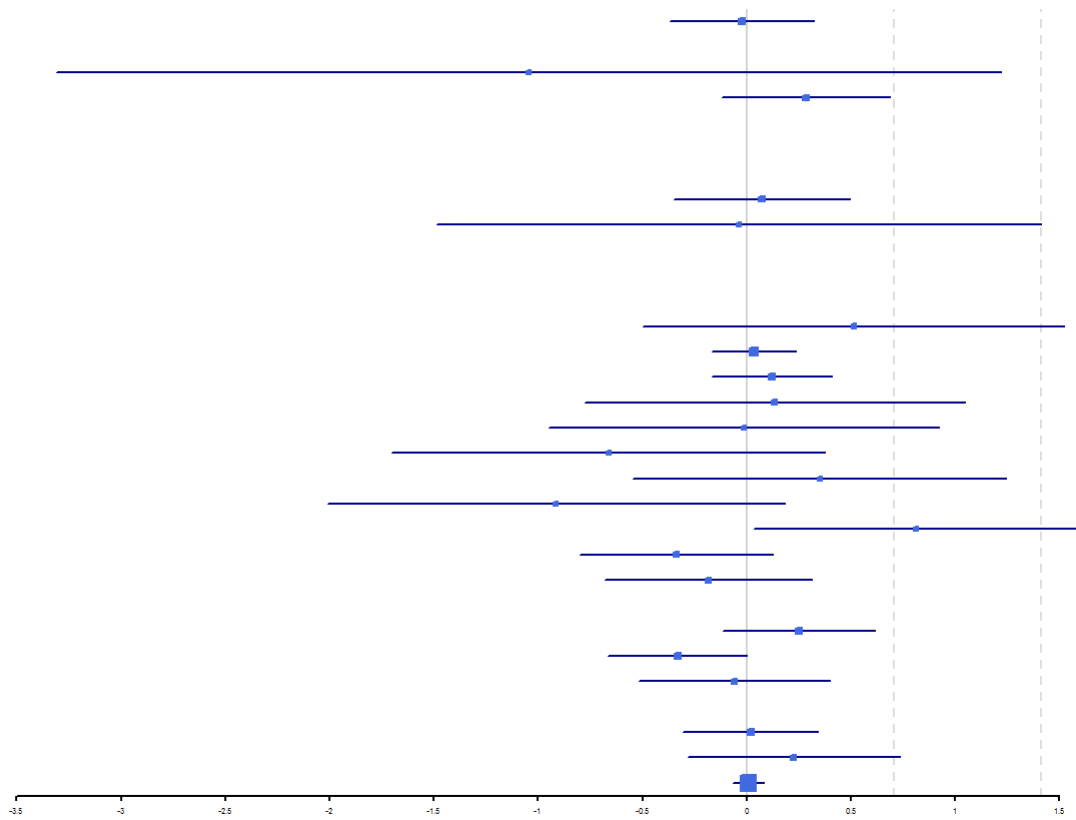

### Mean Cortical Thickness ASD vs HC. (I2= 37.97 )

- NIJMEGEN\_1-1
- NIJMEGEN\_1-2
- NIJMEGEN\_2
- MRC
- BRC
- PITT
- CMU
- TORONTO
- FRANKFURT
- ABIDE\_CALTECH
- ABIDE\_LEUVEN\_1
- ABIDE\_MAX\_MUN
- ABIDE\_NYU
- ABIDE\_OLIN
- ABIDE\_PITT
- ABIDE\_SBL
- ABIDE\_SDSU
- ABIDE\_TCD
- ABIDE\_UM\_1
- ABIDE\_UM\_2
- ABIDE\_USM
- UMCU\_1
- UMCU\_2
- TCD
- PHGGM
- ABIDEII-BNI\_1
- ABIDEII-ETH\_1
- ABIDEII-IP\_1
- ABIDEII-IU\_1
- ABIDEII-KUL
- ABIDEII-NYU\_1
- ABIDEII-OILH\_2
- ABIDEII-SDSU\_1
- ABIDEII-TCD\_1
- ABIDEII-USM\_1
- TORONTO
- SAOPAULO
- PITT
- Dresden
- average

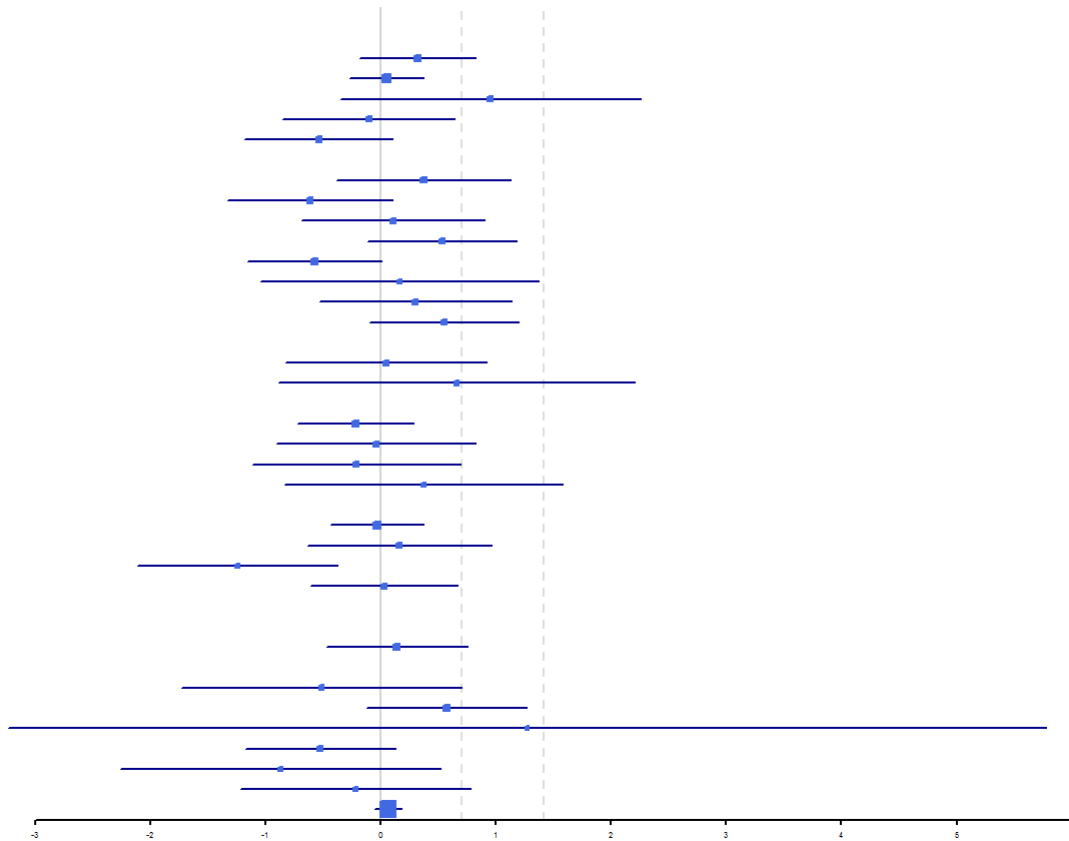

[Adults]

### Full Surface Area OCD vs HC. (I2= 43.12 )

Benedetti  
Beucke  
Brennan  
Cheng\_1  
Cheng\_2  
Denys  
van den Heuvel\_1  
van den Heuvel\_2  
Hirano  
Hoexter  
Koch  
Kvale  
Kwon\_1  
Kwon\_2  
Kwon\_3  
Mataix-Cols  
Menchon  
Morgado  
Nakamae\_1  
Nakamae\_2  
Nakao  
Nurmi  
Reddy\_1  
Reddy\_2  
Simpson  
Spalletta  
Stein  
Stern  
Tolin  
Walitza  
Wang  
Marsh  
Stewart  
average

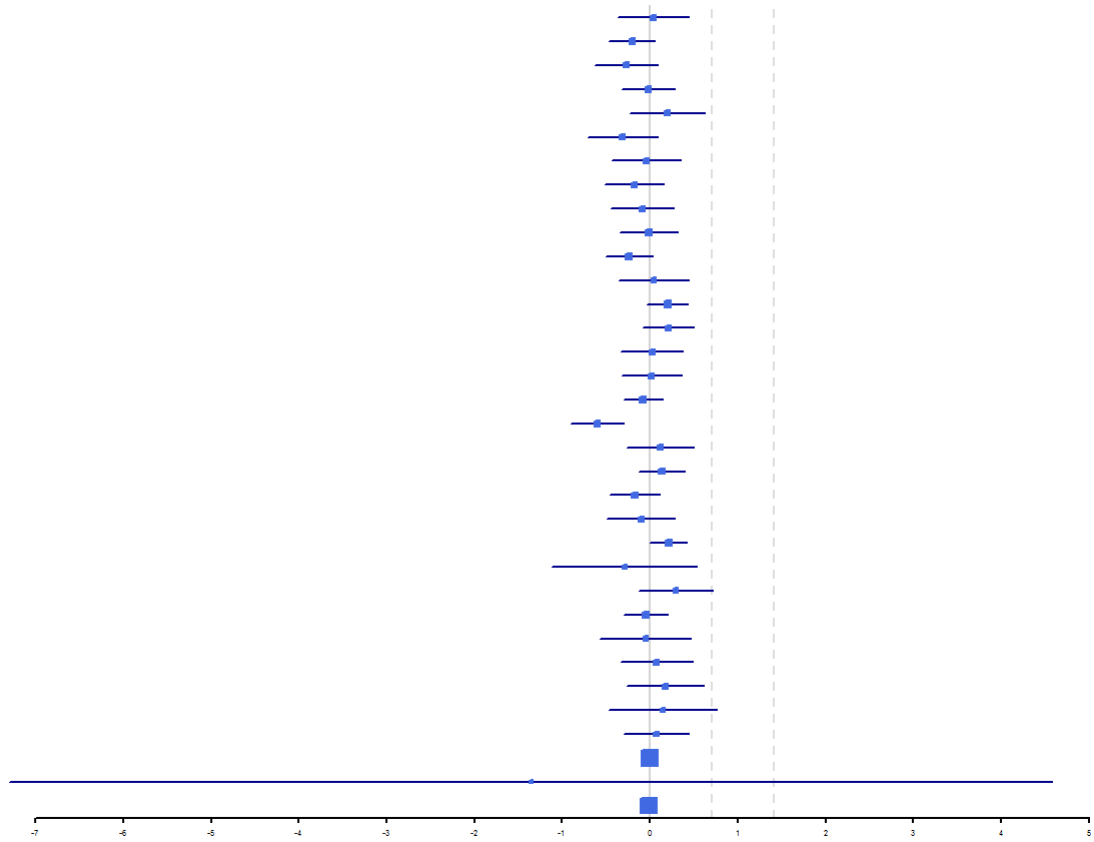

### Full Surface Area ADHD vs HC. (I2= 22.39 )

ACPU  
ADHD-WUE  
ADHD200KKI  
ADHD200Peking\_1  
ADHD-Konrad\_1  
ADHD-Konrad\_2  
ADHD-Konrad\_3  
ADHD-Russia  
Bergen-adultADHD  
DAT-london  
Dundee  
EPOD\_1  
EPOD\_2  
Hartford-Olin  
IMpACT-NL  
MGH-ADHD  
MTA\_1  
MTA\_2  
MTA\_3  
MTA\_4  
MTA\_5  
MTA\_6  
NeuroImageADAM  
NeuroImageNIJM  
NIH  
NYU ADHD  
SAOPAULO  
Sussex  
Tuebingen  
UAB-ADHD  
UCHZ  
average

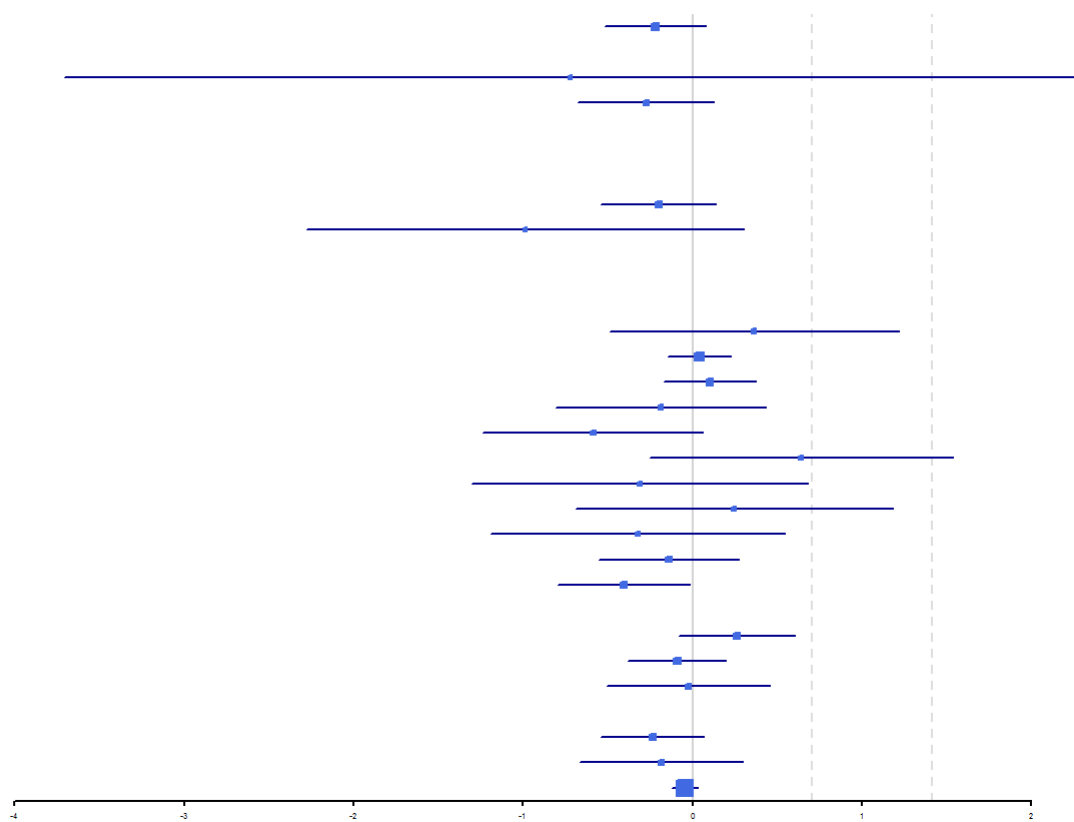

[Adults]

### Full Surface Area ASD vs HC. (I2= 40.08 )

NIJMEGEN\_1-1  
NIJMEGEN\_1-2  
NIJMEGEN\_2  
MRC  
BRC  
PITT  
CMU  
TORONTO  
FRANKFURT  
ABIDE\_CALTECH  
ABIDE\_LEUVEN\_1  
ABIDE\_MAX\_MUN  
ABIDE\_NYU  
ABIDE\_OLIN  
ABIDE\_PITT  
ABIDE\_SBL  
ABIDE\_SDSU  
ABIDE\_TCD  
ABIDE\_UM\_1  
ABIDE\_UM\_2  
ABIDE\_USM  
UMCU\_1  
UMCU\_2  
TCD  
PHGGM  
ABIDEII-BNI\_1  
ABIDEII-ETH\_1  
ABIDEII-IP\_1  
ABIDEII-IU\_1  
ABIDEII-KUL  
ABIDEII-NYU\_1  
ABIDEII-OILH\_2  
ABIDEII-SDSU\_1  
ABIDEII-TCD\_1  
ABIDEII-USM\_1  
TORONTO  
SAOPAULO  
PITT  
Dresden  
average

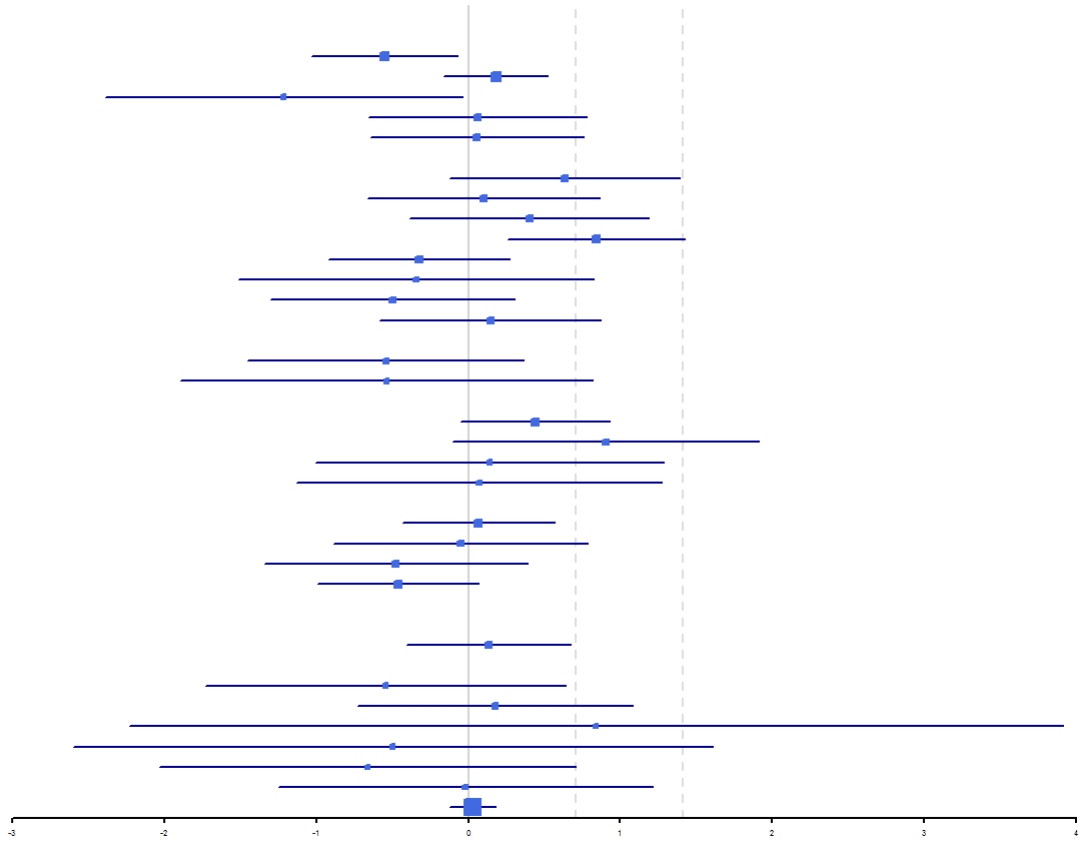

### Intracranial Volume OCD vs HC. (I2= 57.17 )

Benedetti  
Beucke  
Brennan  
Cheng\_1  
Cheng\_2  
Denys  
van den Heuvel\_1  
van den Heuvel\_2  
Hirano  
Hoexter  
Koch  
Kvale  
Kwon\_1  
Kwon\_2  
Kwon\_3  
Mataix-Cols  
Menchon  
Morgado  
Nakamae\_1  
Nakamae\_2  
Nakao  
Nurmi  
Reddy\_1  
Reddy\_2  
Simpson  
Spalletta  
Stein  
Stern  
Tolin  
Walitza  
Wang  
Marsh  
Stewart  
average

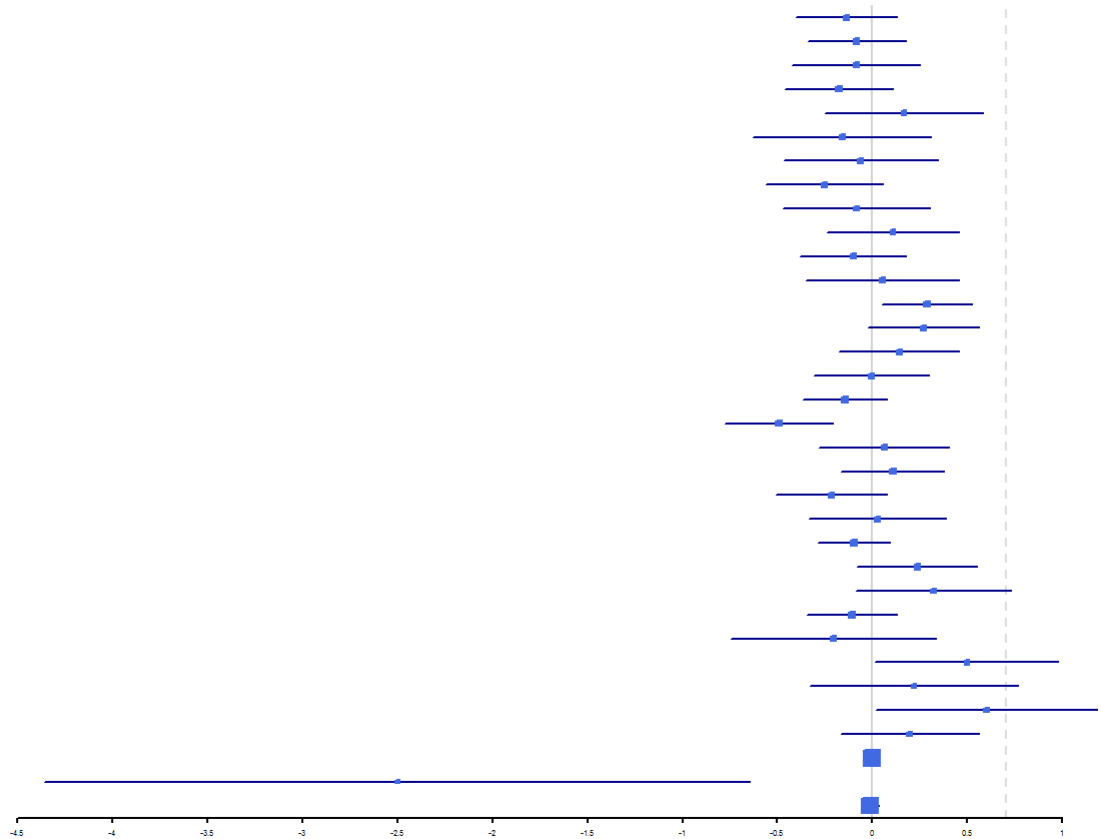

[Adults]

### Intracranial Volume ADHD vs HC. (I2= 21.28 )

ACPU  
ADHD-WUE  
ADHD200KKI  
ADHD200Peking\_1  
ADHD-Konrad\_1  
ADHD-Konrad\_2  
ADHD-Konrad\_3  
ADHD-Russia  
Bergen-adultADHD  
DAT-london  
Dundee  
EPOD\_1  
EPOD\_2  
Hartford-Olin  
IMpACT-NL  
MGH-ADHD  
MTA\_1  
MTA\_2  
MTA\_3  
MTA\_4  
MTA\_5  
MTA\_6  
NeuroImageADAM  
NeuroImageNIJM  
NIH  
NYU ADHD  
SAOPAULO  
Sussex  
Tuebingen  
UAB-ADHD  
UCHZ  
average

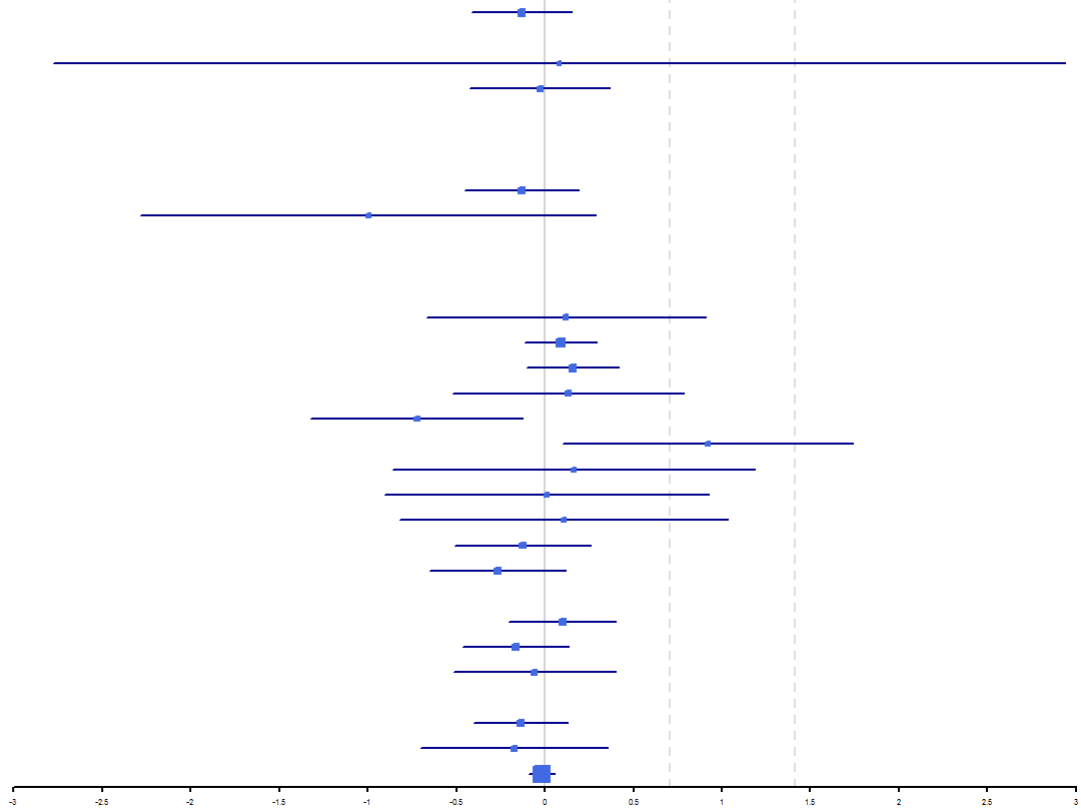

### Intracranial Volume ASD vs HC. (I2= 53.85 )

NIJMEGEN\_1-1  
NIJMEGEN\_1-2  
NIJMEGEN\_2  
MRC  
BRC  
PITT  
CMU  
TORONTO  
FRANKFURT  
ABIDE\_CALTECH  
ABIDE\_LEUVEN\_1  
ABIDE\_MAX\_MUN  
ABIDE\_NYU  
ABIDE\_OLIN  
ABIDE\_PITT  
ABIDE\_SBL  
ABIDE\_SDSU  
ABIDE\_TCD  
ABIDE\_UM\_1  
ABIDE\_UM\_2  
ABIDE\_USM  
UMCU\_1  
UMCU\_2  
TCD  
PHGGM  
ABIDEII-BNI\_1  
ABIDEII-ETH\_1  
ABIDEII-IP\_1  
ABIDEII-IU\_1  
ABIDEII-KUL  
ABIDEII-NYU\_1  
ABIDEII-OILH\_2  
ABIDEII-SDSU\_1  
ABIDEII-TCD\_1  
ABIDEII-USM\_1  
TORONTO  
SAOPAULO  
PITT  
Dresden  
average

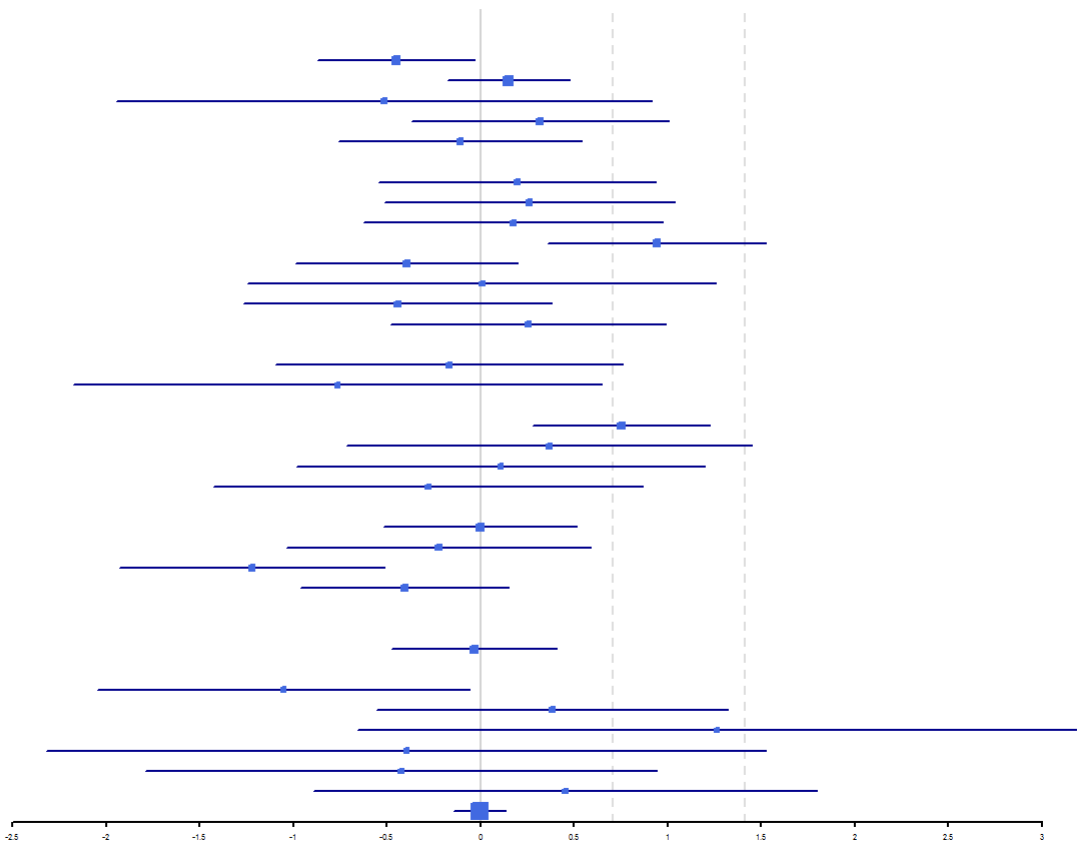

Supplement: appi.ajp.2020.19030331.ds004_SI5-SI7_MRI-MetaAnalyses.pdf [file appi.ajp.2020.19030331.ds004_SI5-SI7_MRI-MetaAnalyses.pdf]
