# Supplementary material for: Subcortical Brain Volume, Regional Cortical Thickness, and Cortical Surface Area Across Disorders: Findings From the ENIGMA ADHD, ASD, and OCD Working Groups
Source: Atypon-hosted journal article supplement (doi:10.1176/appi.ajp.2020.19030331), 2020-06-16
Supplement: ajp_19030331_correction01.pdf [file ajp_19030331_correction01.pdf]

## **Correction to Boedhoe et al.**

When the article “Subcortical Brain Volume, Regional Cortical Thickness, and Cortical Surface Area Across Disorders: Findings From the ENIGMA ADHD, ASD, and OCD Working Groups,” by Premika S.W. Boedhoe, Ph.D., et al. (doi: 10.1176/appi.ajp.2020.19030331), was published online on June 16, 2020, the name of author Kerstin Konrad, Ph.D., was presented incorrectly. The name was corrected and the article was reposted on June 24, 2020.
