# Supplementary material for: Subcortical Brain Volume, Regional Cortical Thickness, and Cortical Surface Area Across Disorders: Findings From the ENIGMA ADHD, ASD, and OCD Working Groups
Source: Atypon-hosted journal article supplement (doi:10.1176/appi.ajp.2020.19030331), 2020-06-16
Supplement: appi.ajp.2020.19030331.ds002_si1-si2_and_disclosures.pdf [file appi.ajp.2020.19030331.ds002_si1-si2_and_disclosures.pdf]

Disclosures and Acknowledgments:

ENIGMA ADHD Working Group

ENIGMA ASD Working Group

ENIGMA OCD Working Group

Supplemental Information 1:

Image Exclusion Criteria, Key-MRI feature selection, Age-distribution plots

Supplemental Information 2:

Trend results

## Disclosures and Acknowledgments

### ENIGMA ADHD Working Group

#### Disclosures

*David Coghill* served in an advisory or consultancy role for Lilly, Medice, Novartis, Oxford outcomes, Shire and Viforpharma. He received conference support or speaker's fee by Janssen McNeil, Lilly, Medice, Novartis, Shire and Sunovian. He is/has been involved in clinical trials conducted by Eli Lilly and Shire. The present work is unrelated to the above grants and relationships. *Jonna Kuntsi* has given talks at educational events sponsored by Medice; all funds are received by King's College London and used for studies of ADHD. *Anders Dale* is a Founder of CorTechs Labs, Inc. He serves on the Scientific Advisory Boards of CorTechs Labs and Human Longevity, Inc., and receives research funding through a Research Agreement with General Electric Healthcare. *Paulo Mattos* was on the speakers' bureau and/or acted as consultant for Janssen-Cilag, Novartis, and Shire in the previous 5 years; he also received travel awards to participate in scientific meetings from those companies. The ADHD outpatient program (Grupo de Estudos do Déficit de Atenção/Institute of Psychiatry) chaired by Dr. Mattos has also received research support from Novartis and Shire. The funding sources had no role in the design and conduct of the study; collection, management, analysis, or interpretation of the data; or preparation, review, or approval of the manuscript. *Tobias Banaschewski* served in an advisory or consultancy role for Lundbeck, Medice, Neurim Pharmaceuticals, Oberberg GmbH, Shire, and Infectopharm. He received conference support or speaker's fee by Lilly, Medice and Shire. He received royalties from Hogrefe, Kohlhammer, CIP Medien, Oxford University Press. The

present work is unrelated to the above grants and relationships. *Katya Rubia* received speaker's fees from Shire, Medice and a grant from Shire pharmaceuticals for another project. *Jan Haavik* has received speaker fees from Eli Lilly, Shire, Medice and Biocodex. *Stephen V. Faraone*, in the past year, received income, potential income, travel expenses continuing education support and/or research support from Tris, Otsuka, Arbor, Ironshore, Shire, Akili Interactive Labs, VAYA, Ironshore, Sunovion, Supernus and Genomind. With his institution, he has US patent US20130217707 A1 for the use of sodium-hydrogen exchange inhibitors in the treatment of ADHD. *Joseph Biederman* is currently receiving research support from the following sources: AACAP, Feinstein Institute for Medical Research, Food and Drug Administration, Genentech, Headspace Inc., Lundbeck AS, Neurocentria Inc., NIDA, Pfizer Pharmaceuticals, Roche TCRC Inc., Shire Pharmaceuticals Inc., Sunovion Pharmaceuticals Inc., and NIH. Dr. Biederman has a financial interest in Avekshan LLC, a company that develops treatments for attention deficit hyperactivity disorder (ADHD). His interests were reviewed and are managed by Massachusetts General Hospital and Partners HealthCare in accordance with their conflict of interest policies. Dr. Biederman's program has received departmental royalties from a copyrighted rating scale used for ADHD diagnoses, paid by Bracket Global, Ingenix, Prophase, Shire, Sunovion, and Theravance; these royalties were paid to the Department of Psychiatry at MGH. In 2019, Dr. Biederman is a consultant for Akili, Jazz Pharma, and Shire. Through MGH corporate licensing, he has a US Patent (#14/027,676) for a non-stimulant treatment for ADHD, and a patent pending (#61/233,686) on a method to prevent stimulant abuse. In 2018, Dr. Biederman was a consultant for Akili and Shire. *Kerstin Konrad* received speaking fees from Medice, Lilly and Shire. *Josep-Antoni Ramos-Quiroga* Josep-Antoni Ramos-Quiroga was on the speakers' bureau and/or acted as consultant for Eli-Lilly, Janssen-Cilag, Novartis, Shire, Lundbeck, Almirall, Braingaze,

Sincrolab, Medice and Rubió in the last 5 years. He also received travel awards (air tickets + hotel) for taking part in psychiatric meetings from Janssen-Cilag, Medice, Rubió, Shire, and Eli-Lilly. The Department of Psychiatry chaired by him received unrestricted educational and research support from the following companies in the last 5 years: Eli-Lilly, Lundbeck, Janssen-Cilag, Actelion, Shire, Ferrer, Oryzon, Roche, Psious, and Rubió. *Klaus-Peter Lesch* served as a speaker for Eli Lilly and received research support from Medice, and travel support from Shire, all outside the submitted work. *Jan Buitelaar* has been in the past 3 years a consultant to / member of advisory board of / and/or speaker for Janssen Cilag BV, Eli Lilly, Medice, Shire, Roche, and Servier. He is not an employee of any of these companies, and not a stock shareholder of any of these companies. He has no other financial or material support, including expert testimony, patents, royalties. *Barbara Franke* has received educational speaking fees from Shire and Medice. *Susanne Walitza* has received lecture honoraria from Eli-Lilly, Opopharma in the last five years. *Daniel Brandeis* serves as an unpaid scientific consultant for an EU-funded neurofeedback trial. *Georgii Karkashadze* received payment for the authorship of the article and speaker fees from Sanofi and from Pikfarma. *Mario Louza* was on the speakers' bureau and/or acted as consultant for Janssen-Cilag and Shire in the previous five years; he also received travel awards to participate in scientific meetings from those companies. The present work is unrelated to the above grants and relationships. *Mark Bellgrove* has received speakers fees and travel expenses from Shire within the last 5 years. He is on the Scientific Advisory Board of Novita Healthcare. He is President of the Australian ADHD Professionals Association (AADPA). All other authors from the ENIGMA ADHD working group have no conflicts of interest related to this study.

## **Grant support**

*ENIGMA*: received funding from the National Institutes of Health (NIH) Consortium grant U54 EB020403, supported by a cross-NIH alliance that funds Big Data to Knowledge Centers of Excellence (BD2K). We also are supported by the European College for Neuropsychopharmacology (ECNP) by a grant for the ECNP Network ADHD across the lifespan. *ADHD-WUE*: Data collection and analysis was supported by the Deutsche Forschungsgemeinschaft (KFO 125, TRR 58/A1 and A5, SFB-TRR 58/B01, B06 and Z02, RE1632/5-1) and the research leading to these results also received funding from the European Union's Seventh Framework Programme for research, technological development and demonstration under grant agreement 602805 (Aggressotype) and the Horizon 2020 research and innovation programme under grant 728018 (Eat2beNICE). *ADHD-DUB1 and DUB2*: The ADHD-DUB1 and DUB2 studies received funding from the Health Research Board Ireland. *ADHD-Mattos*: Ivanei Bramati, Paulo Mattos and Fernanda Tovar-Moll were supported by an IDOR intramural grant. *ADHD200-KKI*: We would like to acknowledge Lindsey Koenig, Michelle Talley, Jessica Foster, Deana Crocetti, Lindsey MacNeil, Andrew Gaddis, Marin Ranta, Anita Barber, Mary Beth Nebel, John Muschelli, Suresh Joel, Brian Caffo, Jim Pekar, Stacy Suskauer. Research was made possible by the following funding sources: The Autism Speaks Foundation and NIH (R01 NS048527, R01MH078160 and R01MH085328), Johns Hopkins General Clinical Research Center (M01 RR00052), National Center for Resource (P41 RR15241), Intellectual and Developmental Disabilities Research Center (HD-24061) *ADHD200-NYU*: We would like to acknowledge Amy Roy, Andrea McLaughlin, Ariel Schvarcz, Camille Chabernaud, Chiara Fontani, Christine Cox, Daniel Margulies, David Anderson, David Gutman, Devika Jutagir, Douglas Slaughter, Dylan Gee, Emily Brady, Jessica Raithel, Jessica Sunshine,

Jonathan Adelstein, Kristin Gotimer, Leila Sadeghi, Lucina Uddin, Maki Koyama, Natan Potler, Nicoletta Adamo, Rebecca Grzadzinski, Rebecca Lange, Samantha Adelsberg, Samuele Cortese, Saroja Bangaru, Xinian Zuo, Zarrar Shehzad and Zoe Hyde. Data collection was made possible thanks to funding from NIMH (R01MH083246), Autism Speaks, The Stavros Niarchos Foundation, The Leon Levy Foundation, and an endowment provided by Phyllis Green and Randolph Cōwen. *ADHD200-Peking*: we would like to acknowledge Jue-jing Ren, De-yi Wang, Su-fang Li, Zu-lai Peng, Peng Wang, Yun-yun Zhu, Zhao Qing. Research was made possible by the following funding sources: The Commonwealth Sciences Foundation, Ministry of Health, China (200802073), The National Foundation, Ministry of Science and Technology, China (2007BAI17B03), The National Natural Sciences Foundation, China (30970802), The Funds for International Cooperation of the National Natural Science Foundation of China (81020108022), The National Natural Science Foundation of China (8100059), Open Research Fund of the State Key Laboratory of Cognitive Neuroscience and Learning. *ADHD200-OHSU*: We would like to acknowledge the Advanced Imaging Research Center, Bill Rooney, Kathryn L. Mills, Taciana G. Costa Dias, Michelle C. Fenesy, Bria L. Thurlow, Corrine A. Stevens, Samuel D. Carpenter, Michael S. Blythe, Colleen F. Schmitt. Research was made possible by the following funding resources: K99/R00 MH091238 (Fair), R01 MH086654 (Nigg), Oregon Clinical and Translational Research Institute (Fair), Medical Research Foundation (Fair), UNCF/Merck (Fair), Ford Foundation (Fair). *ADHD-UKA*: KFO-112 and IRTG1328 was supported by the German Research Foundation (DFG). *DAT-London*: This work was supported in part by UK Medical Research, Council Grant G03001896 to J Kuntsi and NIH grants, R01MH62873 and R01MH081803 to SV Faraone. *IMpACT*: The IMpACT study was supported by a grant from the Brain and Cognition Excellence Program (grant 433-09- 229) and personal Veni and Vici grants

of the Netherlands Organization for Scientific Research (NWO, grants 016-196-115 to Martine Hoogman and 016-130-669 to Barbara Franke) and in part by the Netherlands Brain Foundation (grant 15F07[2]27) and the BBMRI-NL (grant CP2010-33). Funding was also provided by a pilot grant of the Dutch National Research Agenda for the NeuroLabNL project. The research leading to these results also received funding from the European Community's Seventh Framework Programme (FP7/2007–2013) under grant agreements 602805 (Aggressotype), 278948 (TACTICS), and 602450 (IMAGEMEND). In addition, the project received funding from the European Union's Horizon 2020 research and innovation programme under the Marie Skłodowska-Curie grant agreement 643051 (MiND), under grant agreements 667302 (CoCA) and 728018 (Eat2beNICE). *NYU ADHD*: NYU data collection and sharing was supported by NIH grants T32MH67763, R01MH083246, K23MH087770, R01MH094639, and U01MH099059 and a grant from the Stavros S. Niarchos Foundation. *UAB-ADHD*: The study and its contributors received funding from the Ministerio de Economía y Competitividad under research grant SAF2012-32362 and: PI12/01139 from the Department of Health of the Government of Catalonia. Additional funding was obtained from the Generalitat de Catalunya. *ZI-CAPS*: The Neurofeedback study was partly funded by the project D8 of the Deutsche Forschungsgesellschaft collaborative research center 636. *ADHD-Rubia*: The study was funded by the UK Department of Health via the National Institutes of Health Research Centre (BRC) for Mental Health South London and the Maudsley NHS Foundation Trust and the Institute of Psychiatry, King's College London. *CAPS\_UZH*: The data contributed to this study were collected in two projects on ADHD and OCD in children and adolescents, supported by the Swiss National Science Foundation (projects 136249 Sinergia and 320030\_130237) and the Hartmann Müller Foundation (1460). *NeuroIMAGE*: This work was supported by NIH grant

R01MH62873, NWO Large Investment Grant 1750102007010 and grants from Radboud University Medical Center, University Medical Center Groningen and Accare, and VU University Amsterdam. This work was also supported by grants from NWO Brain and Cognition (433-09-242 and 056-13-015) and from ZonMW (60-60600-97-193). Further support was received from the European Union FP7 programmes TACTICS (278948) and IMAGEMEND (602450). *MTA*: Data collection and sharing for this project was funded by the NIDA MTA Neuroimaging Study (National Institute on Drug Abuse grant contract HHSN271200800009C). *NIH*: studies were supported by intramural grants at the National Institute of Mental Health and National Human Genome Research Institute. *OHSU*: The OHSU work was supported by NIMH grants R01MH86654, MH099064, and MH115357. *UCHZ*: This work was supported by the University Research Priority Program “Integrative Human Physiology” at the University of Zurich. *ACPU*: This research was conducted within the Academic Child Psychiatry Unit, University of Melbourne, Royal Children’s Hospital and the Developmental Imaging research group, Murdoch Children’s Research Institute, Melbourne, Victoria. National Health and Medical Research Council of Australia (NHMRC) project grants 384419 and 569533 provided funds for the data collection. It was also supported by the Murdoch Children’s Research Institute, the Royal Children’s Hospital and the Children’s MRI Centre, The Royal Children’s Hospital Foundation, and the RCH Mental Health Service, Department of Paediatrics The University of Melbourne and the Victorian Government’s Operational Infrastructure Support Program. Tim Silk was supported by a NHMRC Career Development Award. *NICAP*: The Neuroimaging of the Children’s Attention Project was funded by the National Medical Health and Research Council of Australia (NHMRC; project grant #1065895). Earlier funding of the Children’s Attention Project was as funded by an NHMRC project grant #1008522 and a grant from the



Collier Foundation. This research was conducted within the Developmental Imaging research group, Murdoch Children's Research Institute and the Children's MRI Centre, The Royal Children's Hospital, Melbourne, Victoria. It was supported by the Murdoch Children's Research Institute, The Royal Children's Hospital, The Royal Children's Hospital Foundation, Department of Paediatrics at The University of Melbourne and the Victorian Government's Operational Infrastructure Support Program. *Tübingen*: The recruitment of the Tübingen sample was funded by the Deutsche Forschungsgemeinschaft (DFG grant: ET 112/5-1). *Dundee*: This work was supported by a grant from TENOVUS SCOTLAND and was conducted in collaboration with the Dundee site of the ADHD Drugs Use Chronic Effects (ADDUCE) study (EU FP7 agreement 260576). *ePOD*: The neuroimaging studies of the ePOD-MPH trial (NTR3103) were supported by faculty resources of the Academic Medical Center, University of Amsterdam, and by grant 11.32050.26 from the European Research Area Network Priority Medicines for Children (Sixth Framework Programme) to Liesbeth Reneman. *Sao Paulo*: The present investigation was supported by a 2010 NARSAD Independent Investigator Award (NARSAD: The Brain and Behavior Research Fund) awarded to Geraldo F. Busatto. Geraldo F. Busatto is also partially funded by CNPq-Brazil. *Sussex*: This study was supported by funding from Brighton and Sussex Medical School and the Dr. Mortimer and Dame Theresa Sackler Foundation. *Clinic Barcelona*: This work has received financial support from two grants, *Fundació la Marató de TV3-2009* (project 091810) and *Fondo de Investigaciones Sanitarias*, of the Spanish Ministry of Health (project PI11/01419). *Maarten Mennes*: supported by a Marie Curie International Incoming Fellowship within the 7th European Community Framework Programme, grant agreement n° 327340. *Jan Haavik*: Stiftelsen Kristian Gerhard Jebsen (SKGJ-MED 02). *Steve Faraone*: K.G.

Jebsen Centre for Research on Neuropsychiatric Disorders, University of Bergen, Bergen, Norway.

## **ENIGMA ASD Working Group**

### **Disclosures**

*Dr. Anagnostou* has served as a consultant or advisory board member for Roche and Takeda; she has received funding from the Alva Foundation, Autism Speaks, Brain Canada, the Canadian Institutes of Health Research, the Department of Defense, the National Centers of Excellence, NIH, the Ontario Brain Institute, the Physicians' Services Incorporated (PSI) Foundation, Sanofi-Aventis, and SynapDx, as well as in-kind research support from AMO Pharma; she receives royalties from American Psychiatric Press and Springer and an editorial honorarium from Wiley.

*Dr. Arango* has served as a consultant for or received honoraria or grants from Acadia, Abbott, Amgen, CIBERSAM, Fundación Alicia Koplowitz, Instituto de Salud Carlos III, Janssen-Cilag, Lundbeck, Merck, Instituto de Salud Carlos III (co-financed by the European Regional Development Fund "A way of making Europe," CIBERSAM, the Madrid Regional Government [S2010/BMD-2422 AGES], the European Union Structural Funds, and the European Union Seventh Framework Programme under grant agreements FP7-HEALTH-2009-2.2.1-2-241909, FP7-HEALTH-2009-2.2.1-3-242114, FP7-HEALTH-2013-2.2.1-2-603196, and FP7-HEALTH-2013-2.2.1-2-602478), Otsuka, Pfizer, Roche, Servier, Shire, Takeda, and Schering-Plough. *Dr. Freitag* has served as a consultant for Desitin regarding issues on ASD. *Dr. De Martino* is a coauthor of the Italian version of the Social Responsiveness Scale, for which she may receive royalties. *Dr. Rubia* has received speaking honoraria from Eli Lilly, Medice, and Shire. *Dr.*

*Buitelaar* has served as a consultant, advisory board member, or speaker for Eli Lilly, Janssen-Cilag, Lundbeck, Medice, Novartis, Servier, Shire, and Roche, and he has received research support from Roche and Vifor. *Dr. Gallagher* received funding from the Meath Foundation and the National Childrens Research Centre in Ireland. The other authors report no financial relationships with commercial interests.

### **Grant support**

ENIGMA received funding from NIH Consortium grant U54 EB020403 to *Dr. Paul Thompson*, supported by a cross-NIH alliance that funds Big Data to Knowledge Centers of Excellence (BD2K). This research was further supported by the European Community's Seventh Framework Programme (FP7/2007–2013) under grant agreement 278948 (TACTICS), and the Innovative Medicines Initiative Joint Undertaking under grant agreement 115300 (EU-AIMS), resources of which are composed of financial contributions from the European Union's Seventh Framework Programme (FP7/2007–2013) and the European Federation of Pharmaceutical Industries and Associations companies' in-kind contribution. The Canadian samples were collected as part of the Province of Ontario Neurodevelopmental Disorders (POND) Network, funded by the Ontario Brain Institute (grant IDS-I1-02 to *Dr. Anagnostou* and *Dr. Lerch*). *Dr Calvo* has received The Marató TV3 Foundation grant 091710, the Carlos III Health Institute (PI091588) co-funded by FEDER funds/European Regional Development Fund (ERDF), "a way to build Europe". *Declan Murphy* has received funding from the Innovative Medicines Initiative 1 and 2 Joint Undertaking under grant agreements 115300 (EU AIMS) and 777394 (AIMS-2-TRIALS), the National Institute for Health Research (NIHR) Biomedical Research Centre at South London and Maudsley NHS Foundation Trust and King's College London, and a Medical Research Council grant G0400061.

## **ENIGMA OCD Working Group**

### **Disclosures**

*Dr. Baker* has received research support from the National Institute of Mental Health (NIMH) and Valera Health. *Dr. Brennan* has received consulting fees from Rugen Therapeutics and Nobilis Therapeutics and research grant support from Eli Lilly, Transcept Pharmaceuticals, and Biohaven Pharmaceuticals. *Dr. Mataix-Cols* receives royalties for contributing articles to UpToDate, Wolters Kluwer Health and fees from Elsevier for editorial tasks (all unrelated to the submitted work). *Dr. Simpson* received research support for multi-site clinical trial from Biohaven, Inc; royalties from UpToDate, Inc and Cambridge University Press. *Dr. Stein* has received research grants and/or consultancy honoraria from AMBRF, Biocodex, Cipla, Lundbeck, National Responsible Gambling Foundation, Novartis, Servier, and Sun in the past 3 years. *Dr. Walitza* has received lecture honoraria Opopharma in the last 3 years. Her work was supported in the last 3 years by the Swiss National Science Foundation (SNF), diverse EU FP7s, HSM Hochspezialisierte Medizin of the Kanton Zurich, Switzerland, Bfarm Germany, Zinep, Hartmann Müller Stiftung, Olga Mayenfisch. All other authors from the ENIGMA OCD working group have no conflicts of interest related to this study.

### **Grant support**

The **ENIGMA Obsessive Compulsive Disorder working group** gratefully acknowledges support from the NIH BD2K award U54 EB020403 (PI: *Dr. Thompson*) and Neuroscience Amsterdam, IPB-grant to *Dr. Schmaal* and *Dr. van den Heuvel*. Supported by the Japan Society for the Promotion of Science (JSPS; KAKENHI grants 18K15523 to *Dr. Abe*, 16K19778 and 18K07608 to *Dr. Nakamae*, 16K04344 to *Dr. Hirano*, and 26461762 to *Dr. Nakagawa*); Ontario Mental Health Foundation Research Training Fellowship to *Dr. Ameis*; the Fundação de Amparo

à Pesquisa do Estado de São Paulo (FAPESP, São Paulo Research Foundation; grant 2011/21357-9; the EU FP7 project TACTICS (grant 278948 to *Dr. Buitelaar*); the National Natural Science Foundation of China (81560233 to *Dr. Cheng*); the International Obsessive-Compulsive Disorder Foundation (IOCDF) Research Award to *Dr. Gruner*; the Dutch Organization for Scientific Research (NWO) (grants 912-02-050, 907-00-012, 940-37-018, and 916.86.038); the Netherlands Society for Scientific Research (NWO-ZonMw VENI grant 916.86.036 to *Dr. van den Heuvel*; NWO-ZonMw AGIKO stipend 920-03-542 to *Dr. de Vries*), a NARSAD Young Investigator Award to *Dr. van den Heuvel*, and the Netherlands Brain Foundation (2010(1)-50 to *Dr. van den Heuvel*); the Federal Ministry of Education and Research of Germany (BMBF-01GW0724 to *Dr. Kathmann*); the Alberta Innovates Translational Health Chair in Child and Youth Mental Health and the Ontario Brain Institute funding *Dr. Arnold*; the Deutsche Forschungsgemeinschaft (DFG; grant KO 3744/7-1 to *Dr. Koch*); the Helse Vest Health Authority (911754, 911880 to *Dr. Kvale*) and the Norwegian Research Council (HELSEFORSK 243675 to *Dr. Kvale*); the Wellcome Trust and a pump priming grant from the South London and Maudsley Trust, London, UK (project grant 064846 to *Dr. Mataix-Cols*); the Generalitat de Catalunya (AGAUR 2017 SGR 1247 to *Dr. Menchón*); the PhD-iHES program (FCT fellowship grant PDE/BDE/113601/2015 to *Dr. Moreira*); the Japanese Ministry of Education, Culture, Sports, Science and Technology (Grant-in-Aid for Scientific Research (C) 22591262, 25461732, 16K10253 to *Dr. Nakao*); the Italian Ministry of Health ( RC13-14-15-16-17-18A to *Dr. Spalletta, Dr. Piras Fabrizio, Dr. Piras Federica*); the National Center for Advancing Translational Sciences (grant UL1TR000067/KL2TR00069) and the NIMH (grant R33MH107589 and R01MH111794) grants to *Dr. Stern*; the SA MRC funding and the National Research Foundation of South Africa *Dr. Stein and Dr. Lochner*; the Canadian Institutes of

Health Research, and British Columbia Provincial Health Services Authority funding *Dr. Stewart*; the Netherlands Organization for Scientific Research (NWO/ZonMW Vidi 917.15.318 to *Dr. van Wingen*); the Wellcome-DBT India Alliance (grant 500236/Z/11/Z to *Dr. Venkatasubramanian*); the National Natural Science Foundation of China (81371340) and the Shanghai Key Laboratory of Psychotic Disorders (13dz2260500) to *Dr. Wang*; the Government of India grants from the Department of Science and Technology (grants SR/S0/HS/0016/2011 to *Prof. Y.C. Janardhan Reddy*, and DST INSPIRE faculty grant -IFA12-LSBM-26 to *Dr. Janardhanan C. Narayanaswamy*) and from the Department of Biotechnology (grants BT/PR13334/Med/30/259/2009 to *Prof. Y.C. Janardhan Reddy* and BT/06/IYBA/2012 to *Dr. Janardhanan C. Narayanaswamy*); the Dana Foundation and NARSAD to *Dr. Fitzgerald*; the NIMH (grants R01MH107419 and K23MH082176 to *Dr. Fitzgerald*; R21MH101441 to *Dr. Marsh*; R21MH093889 to *Drs. Marsh and Simpson*; K23-MH104515 to *Dr. Baker*; R01MH081864 to *Drs. O'Neill, Piacentini*; and R01MH085900 to *Drs. O'Neill and Feusner*); the NIMH and the David Judah Fund at the Massachusetts General Hospital (grant K23-MH092397 to *Dr. Brennan*); the Marató TV3 Foundation (grants 01/2010 and 091710 to *Dr. Lazaro*); the Carlos III Health Institute (PI040829 to *Dr. Lazaro*, grant CPII16/00048 and project grants PI13/01958 and PI16/00889 to *Dr. Soriano-Mas*), co-funded by FEDER funds/European Regional Development Fund (ERDF), a way to build Europe; the AGAUR (2017 SGR 881 to *Dr. Lazaro*); the Michael Smith Foundation for Health Research funding *Dr. Jaspers-Fayer* and *Dr. Stewart*; the Carlos III Health Institute (PI14/00419 to *Dr. Alonso*, grant FI17/00294 to Ignacio Martínez-Zalacaín, project grant PI16/00950 to *Dr. Menchón*); and the Japan Agency for Medical Research and Development (AMED grant JP18dm0307002 to *Dr. Hirano*).

# Supplemental Information

---

## Supplemental Information SI1

### Image Exclusion Criteria:

Prior to data processing scans were visually inspected at each site locally and scans with gross brain pathology, artifacts or poor image quality hampering image segmentation were excluded. A neuroimaging researcher at each site individually examined each segmentation by three major steps following standardized ENIGMA protocols to harmonize quality control procedures across multiple sites.

First, outliers were determined by calculating the interquartile range for each of the volumes per cohort and per group (patients and healthy controls). For each subject that was marked as a statistical outlier, a re-inspection of the subject's segmentation was conducted in 3D to evaluate whether it was segmented properly, and excluded if necessary. Second, cortical segmentations were overlaid directly on a subject's T1-weighted scan and snapshots from internal slices of the brain were presented on a webpage for easy checking. Third, webpages were created with external views of the segmentations from different angles of each subject. For these latter two steps, we instructed the sites to perform extensive quality checking according to a standardized manual (available on <http://enigma.ini.usc.edu/protocols/imaging-protocols/>) encompassing the most common segmentation errors by FreeSurfer based on our own experience of several samples across different sites and scanners.

Further, we collected study-wide statistics (means and standard deviations) as well as histogram plots in order to identify non-normally distributed data and major outliers. Lastly, the coordinating PI site per disease working group checked the histograms and summary statistics of every site for possible irregularities that would indicate incorrect segmentations. Where needed, sites were asked to re-inspect suspicious irregularities.

### Key-MRI feature selection:

Several sensitivity analyses were performed to provide better insight into the main group effects presented in the main manuscript. However, given the large number of MRI features listed in the main analyses, we have opted to only display analyses on a subset of key MRI features. Specifically, a set of 10 cortical and subcortical MRI features was selected which demonstrate the strongest effect sizes, both between individual diagnostic groups and controls as well as between the different diagnoses. Therefore, these regions serve to best illustrate the size, direction and variance of our main group effects. These features are: Amygdala, Thalamus, Putamen, Hippocampus, ICV, total mean cortical thickness and full surface area, mean Orbitofrontal thickness, Mean Pars Triangularis thickness and Mean Posterior Cingulate thickness

### Age-distribution plots:

Presented below are the kernel density plots by age for each diagnostic group, and additionally broken down by gender. These plots indicate that the ASD, ADHD and Control groups have a relatively similar distribution pattern, with the mean age centered around adolescence, and increasingly less coverage with increasing age. The OCD cohort is distributed differently, with a mostly adult population. Age distributions for males and females are almost identical.

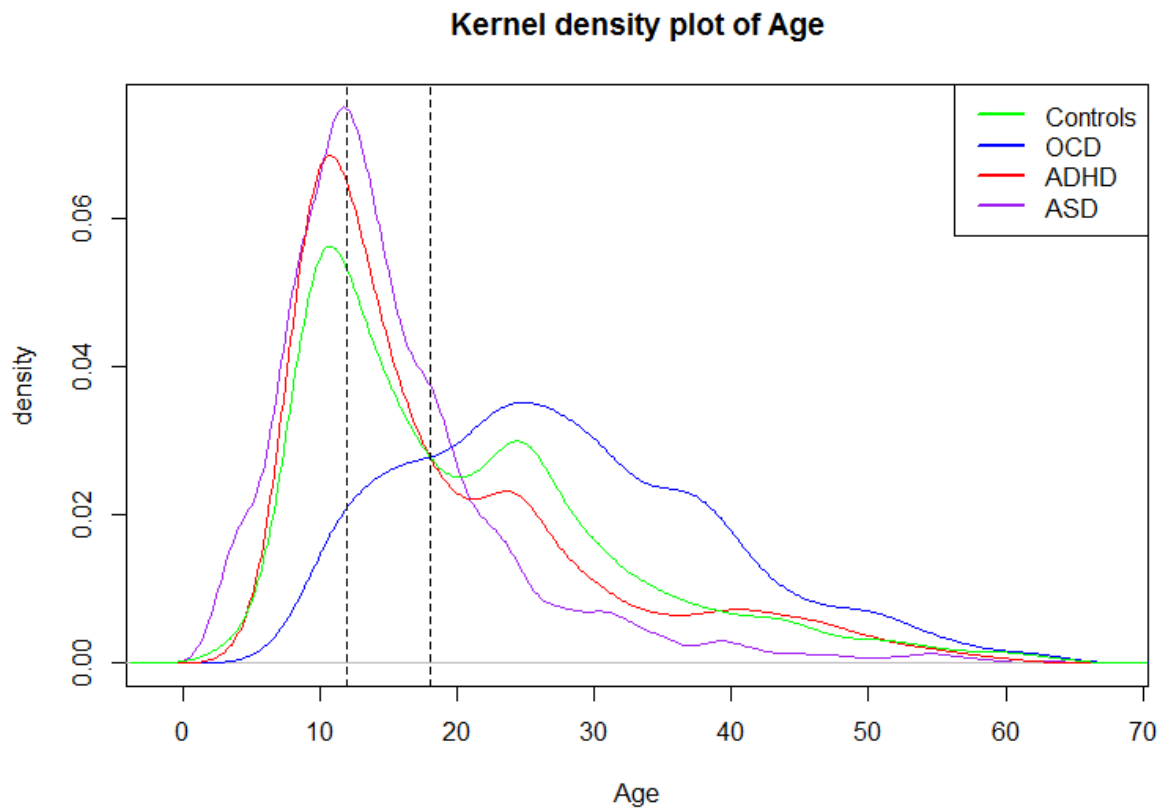

SI Figure 1. Kernel density plot for the entire cohort, broken down by diagnostic group.

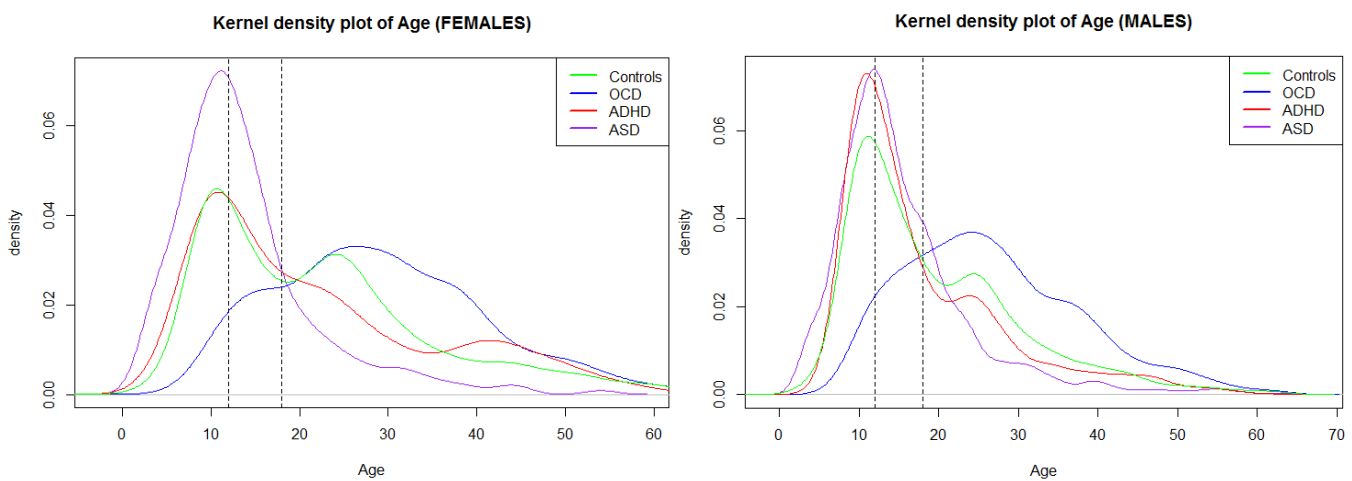

SI Figure 2. Kernel density plot for males and females separately, broken down by diagnostic group.



## Supplemental Information S12

### Trend results

#### Common subcortical and cortical alterations across clinical groups compared to healthy controls

Children with ADHD and those with ASD showed smaller amygdala volumes compared to control children (significant in children with ADHD *effect size*=-0.10; did not survive FDR-correction in children with ASD *effect size*=-0.09; Supplementary Table S5). *Cortical thickness* analysis revealed that both groups also had thinner cortices of the precentral gyrus (significant in children with ADHD *effect size*=-0.16, but did not survive FDR-correction in children with ASD *effect size*=-0.19), temporal pole (significant in children with ASD *effect size*=-0.24, but did not survive FDR-correction in children with ADHD *effect size*=-0.10) and fusiform gyrus (did not survive FDR-correction in both ADHD *effect size*=-0.14 and ASD *effect size*=-0.23) compared to control children (Supplementary Table S6). *Surface area* analysis in children with ADHD and those with ASD revealed smaller surface area of the caudal middle frontal gyrus (did not survive FDR-correction in both ADHD *effect size*=-0.10 and ASD *effect size*=-0.14; Supplementary Table S13). Adolescents with ADHD (*effect size*=-0.12) and those with ASD (*effect size*=-0.11) had a thinner cortex of the parahippocampal gyrus, however this finding did not hold in both groups after FDR-correction. Adults with OCD and those with ASD had smaller hippocampal volumes compared to adult controls (significant in patients with OCD *effect size*=-0.09, but this finding did not survive FDR-correction in patients with ASD *effect size*=-0.11; Supplementary Table S10).

#### Disease-specific subcortical and cortical alterations

Children: Smaller hippocampal volumes were observed in children with ASD compared to those with OCD (*effect size*=-0.19), but did not survive FDR-correction. We also observed smaller putamen in children with ADHD compared to those with OCD (*effect size*=-0.23), however this also did not survive FDR-correction (Supplementary Table S14). The following *cortical thickness* results did not survive the FDR-correction, thinner temporal pole (*effect size*=-0.25) and entorhinal cortex (*effect size*=-0.29) in children with ASD compared to those with OCD, thinner entorhinal (*effect size*=-0.19), middle temporal (*effect size*=-0.22), transverse temporal cortices (*effect size*=-0.23), and thicker pericalcarine cortex in children with ASD compared to those with ADHD. The following *cortical surface area* results did not survive the FDR-correction, lower surface area of the banks of the superior temporal sulcus (*effect size*=-0.25) and larger surface area of the paracentral lobule (*effect size*=0.22) in children with ASD compared to those with OCD, larger surface area of the entorhinal cortex (*effect size*=0.15), isthmus of the cingulate cortex (*effect size*=0.18), paracentral lobule (*effect size*=0.18), and lower surface area of the banks of the superior temporal sulcus (*effect size*=-0.13) in children with ASD compared to those with ADHD.

Adolescents: Larger thalamus volume in adolescents with OCD compared to those with ASD (*effect size*=0.16) did not survive multiple comparison correction (Supplementary Table S17). The following *cortical* results did not survive FDR-correction, thinner lateral occipital (*effect size*=-0.21), thinner posterior cingulate (*effect size*=-0.20), thinner superior frontal cortices (*effect size*=-0.17), a lower

surface area of the paracentral lobule (effect size=-0.18) in adolescents with OCD compared to those with ADHD (Supplementary Table S18-S19), and a lower surface area in adolescents with OCD (effect size=-0.16) compared to adolescents with ASD (Supplementary Table S19).

Adults: The following cortical thickness results did not survive FDR correction: a thinner inferior parietal (effect size=-0.17) and lateral occipital cortex (effect size=-0.17) in adults with OCD compared to adults with ADHD and thicker cortices of the pars opercularis (effect size=0.14), pars orbitalis (effect size=0.16), rostral anterior cingulate (effect size=0.16), superior frontal gyrus (effect size=0.21), and frontal pole (effect size=0.15) in adults with ASD compared to those with ADHD (Supplementary Table S21). The following *surface area* results did not survive FDR-correction: lower surface area of the parahippocampal gyrus (effect size=-0.13) in adults with ADHD compared to those with OCD, lower surface area of the transverse temporal cortex (effect size=-0.17) in adults with OCD compared to those with ASD, and larger surface area of the pars triangularis in adults with ASD compared to those with OCD (effect size=0.14) and ADHD (effect size=0.16).
