# Supplementary material for: Subcortical Brain Volume, Regional Cortical Thickness, and Cortical Surface Area Across Disorders: Findings From the ENIGMA ADHD, ASD, and OCD Working Groups
Source: Atypon-hosted journal article supplement (doi:10.1176/appi.ajp.2020.19030331), 2020-06-16
Supplement: appi.ajp.2020.19030331.ds005_tables_s1-s84.pdf [file appi.ajp.2020.19030331.ds005_tables_s1-s84.pdf]

# Supplementary Tables

---

|                                 |                                                                                                                                                                                     |            |
|---------------------------------|-------------------------------------------------------------------------------------------------------------------------------------------------------------------------------------|------------|
| <b>Supplementary Table S1:</b>  | imaging acquisition details ADHD working group                                                                                                                                      | Page 8-9   |
| <b>Supplementary Table S2:</b>  | imaging acquisition details ASD working group                                                                                                                                       | Page 10-11 |
| <b>Supplementary Table S3:</b>  | imaging acquisition details OCD working group                                                                                                                                       | Page 12-13 |
| <b>Supplementary Table S4:</b>  | demographics, clinical characteristics, age, sex, and numbers breakdown separately for patient groups and control subjects for the full sample                                      | Page 14    |
| <b>Supplementary Table S5:</b>  | mega-analytic results for each subcortical structure comparing pediatric ADHD, ASD and OCD patients to healthy control subjects, controlling for age, sex, ICV, and scan site.      | Page 15-16 |
| <b>Supplementary Table S6:</b>  | mega-analytic results for cortical thickness of each structure comparing pediatric ADHD, ASD and OCD patients to healthy control subjects, controlling for age, sex and scan site.  | Page 17-20 |
| <b>Supplementary Table S7:</b>  | mega-analytic results for each subcortical structure comparing adolescent ADHD, ASD and OCD patients to healthy control subjects, controlling for age, sex, ICV, and scan site.     | Page 21-22 |
| <b>Supplementary Table S8:</b>  | mega-analytic results for surface area of each structure comparing adolescent ADHD, ASD and OCD patients to healthy control subjects, controlling for age, sex, ICV, and scan site. | Page 23-25 |
| <b>Supplementary Table S9:</b>  | mega-analytic results for cortical thickness of each structure comparing adolescent ADHD, ASD and OCD patients to healthy control subjects, controlling for age, sex and scan site. | Page 26-30 |
| <b>Supplementary Table S10:</b> | mega-analytic results for each subcortical structure comparing adult ADHD, ASD and OCD patients to healthy control subjects, controlling for age, sex, ICV, and scan site.          | Page 31-32 |
| <b>Supplementary Table S11:</b> | mega-analytic results for cortical thickness of each structure comparing adult ADHD, ASD and OCD patients to healthy control subjects, controlling for age, sex and scan site.      | Page 33-36 |
| <b>Supplementary Table S12:</b> | mega-analytic results for surface area of each structure comparing adult ADHD, ASD, and OCD patients to healthy control subjects, controlling for age, sex, ICV, and scan site.     | Page 37-40 |

|                                 |                                                                                                                                                                                    |            |
|---------------------------------|------------------------------------------------------------------------------------------------------------------------------------------------------------------------------------|------------|
| <b>Supplementary Table S13:</b> | mega-analytic results for surface area of each structure comparing pediatric ADHD, ASD and OCD patients to healthy control subjects, controlling for age, sex, ICV, and scan site. | Page 41-44 |
| <b>Supplementary Table S14:</b> | mega-analytic results for each subcortical structure comparing pediatric ADHD, ASD and OCD patients, controlling for age, sex, ICV, and scan site.                                 | Page 45    |
| <b>Supplementary Table S15:</b> | mega-analytic results for cortical thickness of each structure comparing pediatric ADHD, ASD and OCD patients, controlling for age, sex and scan site.                             | Page 46-47 |
| <b>Supplementary Table S16:</b> | mega-analytic results for surface area of each structure comparing pediatric ADHD, ASD and OCD patients, controlling for age, sex, ICV, and scan site.                             | Page 48-49 |
| <b>Supplementary Table S17:</b> | mega-analytic results for each subcortical structure comparing adolescent ADHD, ASD and OCD patients, controlling for age, sex, ICV, and scan site.                                | Page 50    |
| <b>Supplementary Table S18:</b> | mega-analytic results for cortical thickness of each structure, comparing adolescent ADHD, ASD and OCD patients, controlling for age, sex and scan site.                           | Page 51-52 |
| <b>Supplementary Table S19:</b> | mega-analytic results for surface area of each structure comparing adolescent ADHD, ASD and OCD patients, controlling for age, sex, ICV, and scan site.                            | Page 53-54 |
| <b>Supplementary Table S20:</b> | mega-analytic results for each subcortical structure comparing adult ADHD, ASD and OCD patients, controlling for age, sex, ICV, and scan site.                                     | Page 55    |
| <b>Supplementary Table S21:</b> | mega-analytic results for cortical thickness of each structure comparing adult ADHD, ASD and OCD patients, controlling for age, sex and scan site.                                 | Page 56-57 |
| <b>Supplementary Table S22:</b> | mega-analytic results for surface area of each structure comparing adult ADHD, ASD and OCD patients, controlling for age, sex, ICV, and scan site.                                 | Page 58-59 |
| <b>Supplementary Table S23:</b> | mega-analytic results for each subcortical structure comparing unmedicated pediatric ADHD, ASD and OCD patients, controlling for age, sex, ICV, and scan site.                     | Page 60    |
| <b>Supplementary Table S24:</b> | mega-analytic results for each subcortical structure comparing medicated pediatric ADHD, ASD and OCD patients, controlling for age, sex, ICV, and scan site.                       | Page 61    |
| <b>Supplementary Table S25:</b> | mega-analytic results for cortical thickness of each structure comparing unmedicated pediatric ADHD, ASD and OCD patients, controlling for age, sex and scan site.                 | Page 62-63 |
| <b>Supplementary Table S26:</b> | mega-analytic results for surface area of each structure comparing unmedicated pediatric ADHD, ASD and OCD patients, controlling for age, sex, ICV, and scan site.                 | Page 64-65 |
| <b>Supplementary Table S27:</b> | mega-analytic results for cortical thickness of each structure comparing medicated pediatric ADHD, ASD and OCD patients, controlling for age, sex and scan site.                   | Page 66-67 |
| <b>Supplementary Table S28:</b> | mega-analytic results for surface area of each structure comparing medicated                                                                                                       |            |

|                                 |                                                                                                                                                                           |            |
|---------------------------------|---------------------------------------------------------------------------------------------------------------------------------------------------------------------------|------------|
| <b>Supplementary Table S29:</b> | pediatric ADHD, ASD and OCD patients, controlling for age, sex, ICV, and scan site.<br>mega-analytic results for surface area of each structure comparing unmedicated     | Page 68-69 |
| <b>Supplementary Table S30:</b> | adult ADHD, ASD and OCD patients, controlling for age, sex, ICV, and scan site<br>mega-analytic results for each subcortical structure comparing unmedicated              | Page 70-71 |
| <b>Supplementary Table S31:</b> | adult ADHD, ASD and OCD patients, controlling for age, sex, ICV, and scan site.<br>mega-analytic results for cortical thickness of each structure comparing               | Page 72    |
| <b>Supplementary Table S32:</b> | unmedicated adult ADHD, ASD and OCD patients, controlling for age, sex and<br>scan site.                                                                                  | Page 73-74 |
| <b>Supplementary Table S33:</b> | mega-analytic results for each subcortical structure comparing unmedicated<br>adolescent ADHD, ASD and OCD patients, controlling for age, sex, ICV, and<br>scan site.     | Page 75    |
| <b>Supplementary Table S34:</b> | mega-analytic results for cortical thickness of each structure comparing<br>unmedicated adolescent ADHD, ASD and OCD patients, controlling for age, sex<br>and scan site. | Page 76-77 |
| <b>Supplementary Table S35:</b> | mega-analytic results for surface area of each structure comparing unmedicated<br>adolescent ADHD, ASD and OCD patients, controlling for age, sex, ICV,<br>and scan site. | Page 78-79 |
| <b>Supplementary Table S36:</b> | mega-analytic results for each subcortical structure comparing medicated<br>adult ADHD, ASD and OCD patients, controlling for age, sex, ICV, and scan site.               | Page 80    |
| <b>Supplementary Table S37:</b> | mega-analytic results for cortical thickness of each structure comparing<br>medicated adult ADHD, ASD and OCD patients, controlling for age, sex and<br>scan site.        | Page 81-82 |
| <b>Supplementary Table S38:</b> | mega-analytic results for surface area of each structure comparing medicated<br>adult ADHD, ASD and OCD patients, controlling for age, sex, ICV, and scan site.           | Page 83-84 |
| <b>Supplementary Table S39:</b> | mega-analytic results for each subcortical structure comparing medicated<br>adolescent ADHD, ASD and OCD patients, controlling for age, sex, ICV, and<br>scan site.       | Page 85    |
| <b>Supplementary Table S40:</b> | mega-analytic results for cortical thickness of each structure comparing<br>medicated adolescent ADHD, ASD and OCD patients, controlling for age, sex<br>and scan site.   | Page 86-87 |
| <b>Supplementary Table S40:</b> | mega-analytic results for surface area of each structure comparing medicated<br>adolescent ADHD, ASD and OCD patients, controlling for age, sex, ICV, and<br>scan site.   | Page 88-89 |

|                                 |                                                                                                                                                                                                |              |
|---------------------------------|------------------------------------------------------------------------------------------------------------------------------------------------------------------------------------------------|--------------|
| <b>Supplementary Table S41:</b> | mega-analytic results for each subcortical structure comparing medicated pediatric ADHD, ASD and OCD patients to healthy control subjects, controlling for age, sex, ICV, and scan site        | Page 90      |
| <b>Supplementary Table S42:</b> | mega-analytic results for cortical thickness of each structure comparing medicated pediatric ADHD, ASD and OCD patients to healthy control subjects, controlling for age, sex and scan site.   | Page 91-92   |
| <b>Supplementary Table S43:</b> | mega-analytic results for surface area of each structure comparing medicated pediatric ADHD, ASD and OCD patients to healthy control subjects, controlling for age, sex, ICV, and scan site.   | Page 93-94   |
| <b>Supplementary Table S44:</b> | mega-analytic results for each subcortical structure comparing medicated adolescent ADHD, ASD and OCD patients to healthy control subjects, controlling for age, sex, ICV, and scan site.      | Page 95      |
| <b>Supplementary Table S45:</b> | mega-analytic results for cortical thickness of each structure comparing medicated adolescent ADHD, ASD and OCD patients to healthy control subjects, controlling for age, sex and scan site.  | Page 96-97   |
| <b>Supplementary Table S46:</b> | mega-analytic results for surface area of each structure comparing medicated adolescent ADHD, ASD and OCD patients to healthy control subjects, controlling for age, sex, ICV, and scan site.  | Page 98-99   |
| <b>Supplementary Table S47:</b> | mega-analytic results for each subcortical structure comparing medicated adult ADHD, ASD and OCD patients to healthy control subjects, controlling for age, sex, ICV, and scan site.           | Page 100     |
| <b>Supplementary Table S48:</b> | mega-analytic results for cortical thickness of each structure comparing medicated adult ADHD, ASD and OCD patients to healthy control subjects, controlling for age, sex and scan site.       | Page 101-102 |
| <b>Supplementary Table S49:</b> | mega-analytic results for surface area of each structure comparing medicated adult ADHD, ASD and OCD patients to healthy control subjects, controlling for age, sex, ICV, and scan site.       | Page 103-104 |
| <b>Supplementary Table S50:</b> | mega-analytic results for each subcortical structure comparing unmedicated pediatric ADHD, ASD and OCD patients to healthy control subjects, controlling for age, sex, ICV, and scan site.     | Page 105     |
| <b>Supplementary Table S51:</b> | mega-analytic results for cortical thickness of each structure comparing unmedicated pediatric ADHD, ASD and OCD patients to healthy control subjects, controlling for age, sex and scan site. | Page 106-107 |

|                                 |                                                                                                                                                                                                 |              |
|---------------------------------|-------------------------------------------------------------------------------------------------------------------------------------------------------------------------------------------------|--------------|
| <b>Supplementary Table S52:</b> | mega-analytic results for surface area of each structure comparing unmedicated pediatric ADHD, ASD and OCD patients to healthy control subjects, controlling for age, sex, ICV, and scan site.  | Page 108-109 |
| <b>Supplementary Table S53:</b> | mega-analytic results for each subcortical structure comparing unmedicated adolescent ADHD, ASD and OCD patients to healthy control subjects, controlling for age, sex, ICV, and scan site.     | Page 110     |
| <b>Supplementary Table S54:</b> | mega-analytic results for cortical thickness of each structure comparing unmedicated adolescent ADHD, ASD and OCD patients to healthy control subjects, controlling for age, sex and scan site. | Page 111-112 |
| <b>Supplementary Table S55:</b> | mega-analytic results for surface area of each structure comparing unmedicated adolescent ADHD, ASD and OCD patients to healthy control subjects, controlling for age, sex, ICV, and scan site. | Page 113-114 |
| <b>Supplementary Table S56:</b> | mega-analytic results for each subcortical structure comparing unmedicated adult ADHD, ASD and OCD patients to healthy control subjects, controlling for age, sex, ICV, and scan site.          | Page 115     |
| <b>Supplementary Table S57:</b> | mega-analytic results for cortical thickness of each structure comparing unmedicated adult ADHD, ASD and OCD patients to healthy control subjects, controlling for age, sex, and scan site.     | Page 116-117 |
| <b>Supplementary Table S58:</b> | mega-analytic results for surface area of each structure comparing unmedicated adult ADHD, ASD and OCD patients to healthy control subjects, controlling for age, sex, ICV, and scan site.      | Page 118-119 |
| <b>Supplementary Table S59:</b> | mega-analytic results for each subcortical structure comparing pediatric ADHD, ASD and OCD patients, controlling for age, sex, ICV, scan site, and IQ.                                          | Page 120     |
| <b>Supplementary Table S60:</b> | mega-analytic results for cortical thickness of each structure comparing pediatric ADHD, ASD and OCD patients, controlling for age, sex, scan site, and IQ.                                     | Page 121-122 |
| <b>Supplementary Table S61:</b> | mega-analytic results for surface area of each structure comparing pediatric ADHD, ASD and OCD patients, controlling for age, sex, ICV, scan site, and IQ.                                      | Page 123-124 |
| <b>Supplementary Table S62:</b> | mega-analytic results for each subcortical structure comparing adolescent ADHD, ASD and OCD patients, controlling for age, sex, ICV, scan site, and IQ.                                         | Page 125     |
| <b>Supplementary Table S63:</b> | mega-analytic results for cortical thickness of each structure comparing adolescent ADHD, ASD and OCD patients, controlling for age, sex, scan site, and IQ.                                    | Page 126-127 |
| <b>Supplementary Table S64:</b> | mega-analytic results for surface area of each structure comparing adolescent ADHD, ASD and OCD patients, controlling for age, sex, ICV, scan site, and IQ.                                     | Page 128-129 |

|                                 |                                                                                                                                                                                                 |              |
|---------------------------------|-------------------------------------------------------------------------------------------------------------------------------------------------------------------------------------------------|--------------|
| <b>Supplementary Table S65:</b> | mega-analytic results for each subcortical structure comparing adult ASD and ADHD to each other and to healthy control subjects, controlling for age, sex, ICV, scan site, and IQ.              | Page 130     |
| <b>Supplementary Table S66:</b> | mega-analytic results for surface area of each structure comparing adult ADHD and ASD to each other and to healthy control subjects, controlling for age, sex, ICV, scan site, and IQ.          | Page 131-132 |
| <b>Supplementary Table S67:</b> | mega-analytic results for cortical thickness of each structure comparing adult ADHD and ASD to each other and to healthy control subjects, controlling for age, sex, scan site, and IQ.         | Page 133-134 |
| <b>Supplementary Table S68:</b> | mega-analytic results for each subcortical structure comparing pediatric ADHD, ASD and OCD patients to healthy control subjects, controlling for age, sex, ICV, scan site and IQ.               | Page 135     |
| <b>Supplementary Table S69:</b> | mega-analytic results for cortical thickness of each structure comparing pediatric ADHD, ASD and OCD patients to healthy control subjects, controlling for age, sex and scan site and IQ.       | Page 136-137 |
| <b>Supplementary Table S70:</b> | mega-analytic results for surface area of each structure comparing pediatric ADHD, ASD and OCD patients to healthy control subjects, controlling for age, sex, ICV, and scan site and IQ.       | Page 138-139 |
| <b>Supplementary Table S71:</b> | mega-analytic results for each subcortical structure comparing adolescent ADHD, ASD and OCD patients to healthy control subjects, controlling for age, sex, ICV, scan site and IQ.              | Page 140     |
| <b>Supplementary Table S72:</b> | mega-analytic results for cortical thickness of each structure comparing adolescent ADHD, ASD and OCD patients to healthy control subjects, controlling for age, sex and scan site and IQ.      | Page 141-142 |
| <b>Supplementary Table S73:</b> | mega-analytic results for surface area of each structure comparing adolescent ADHD, ASD and OCD patients to healthy control subjects, controlling for age, sex, ICV, and scan site and IQ.      | Page 143-144 |
| <b>Supplementary Table S74:</b> | Correlations of the overall effect sizes of the mega-analytic results comparing pediatric ADHD, ASD and OCD patients to healthy control subjects, controlling for age, sex, ICV, and scan site. | Page 145     |
| <b>Supplementary Table S75:</b> | distribution of group sizes for all diagnostic groups in all age bins, comparing the number of samples scanned with 1.5 Tesla vs 3 Tesla field strength scanners.                               | Page 146     |

|                                 |                                                                                                                                                                                           |              |
|---------------------------------|-------------------------------------------------------------------------------------------------------------------------------------------------------------------------------------------|--------------|
| <b>Supplementary Table S76:</b> | mega-analytic results for each subcortical structure comparing pediatric ADHD, ASD and OCD patients to healthy control subjects, split by samples using a 1.5 Tesla and 3 Tesla scanner.  | Page 147     |
| <b>Supplementary Table S77:</b> | mega-analytic results for cortical thickness comparing pediatric ADHD, ASD and OCD patients to healthy control subjects, split by samples using a 1.5 Tesla and 3 Tesla scanner.          | Page 148-149 |
| <b>Supplementary Table S78:</b> | mega-analytic results for cortical surface area comparing pediatric ADHD, ASD and OCD patients to healthy control subjects, split by samples using a 1.5 Tesla and 3 Tesla scanner.       | Page 150-151 |
| <b>Supplementary Table S79:</b> | mega-analytic results for each subcortical structure comparing adolescent ADHD, ASD and OCD patients to healthy control subjects, split by samples using a 1.5 Tesla and 3 Tesla scanner. | Page 152     |
| <b>Supplementary Table S80:</b> | mega-analytic results for cortical thickness comparing adolescent ADHD, ASD and OCD patients to healthy control subjects, split by samples using a 1.5 Tesla and 3 Tesla scanner.         | Page 153-154 |
| <b>Supplementary Table S81:</b> | mega-analytic results for cortical surface area comparing adolescent ADHD, ASD and OCD patients to healthy control subjects, split by samples using a 1.5 Tesla and 3 Tesla scanner.      | Page 155-156 |
| <b>Supplementary Table S82:</b> | mega-analytic results for each subcortical structure comparing adult ADHD, ASD and OCD patients to healthy control subjects, split by samples using a 1.5 Tesla and 3 Tesla scanner.      | Page 157     |
| <b>Supplementary Table S83:</b> | mega-analytic results for cortical thickness comparing adult ADHD, ASD and OCD patients to healthy control subjects, split by samples using a 1.5 Tesla and 3 Tesla scanner.              | Page 158-159 |
| <b>Supplementary Table S84:</b> | mega-analytic results for cortical surface area comparing adult ADHD, ASD and OCD patients to healthy control subjects, split by samples using a 1.5 Tesla and 3 Tesla scanner.           | Page 160-161 |

**Supplementary Table S1: imaging acquisition details ADHD working group**

| <b>Name sample</b> | <b>Site/Country/Cohort</b> | <b>Scanner vendor and type</b> | <b>Matrix size</b> | <b>N slices</b> | <b>Voxel Size (mm)</b> |
|--------------------|----------------------------|--------------------------------|--------------------|-----------------|------------------------|
| ACPU               | Victoria, AUS              | 3T Siemens TrioTim             | 208x230            | 192             | 0.9x0.9x0.9            |
| ADHD-WUE           | Würzburg, DEU              | 3T Siemens Avanto              | 256x256            | 160             | 1 × 1 × 1              |
| ADHD200KKI         | Baltimore, USA             | 1.5T Philips Gyroscan NT       | 256x200            | 200             | 1x1x1                  |
| ADHD200NYU         | New York, USA              | 3T Magnetom Allegra            | 256x256            | 128             | 1.3x1.0x1.3            |
| ADHD200OHSU        | Oregon, USA                | 3T Siemens TrioTim             | 256x240            | 160             | 1.0 × 1.0 × 1.1        |
| ADHD200Peking      | Peking, CHN, I             | 3T Siemens TrioTim             | 256x256            | 128             | 1.3x1.0x1.3            |
|                    | Peking, CHN, II            | 3T Siemens TrioTim             | 256x256            | 176             | 1x1x1                  |
| ADHD-DUB           | Dublin, IRL, I             | 3T Philips Achieva             | 256x240            | na              | 1x1x1                  |
|                    | Dublin, IRL, II            | 1.5T Siemens Vision            | 512x512            | 126             | 0.45x0.45x1.5          |
| ADHD-Konrad        | Aachen, DEU, I             | 1.5T Siemens Sonata            | 256x256            | 160             | 1x1x1                  |
|                    | Aachen, DEU, II            | 1.5T Siemens Sonata            | 180x256            | 160             | 1x1x1                  |
|                    | Aachen, DEU, III           | 3T Siemens Trio                | 256x256            | 160             | 1x1x1                  |
|                    | Aachen, DEU, IV            | 3T Siemens Trio                | 256x256            | 176             | 0.98x0.98x1            |
|                    | Aachen, DEU, V             | 3T Siemens Trio                | 256x256            | 176             | 1x1x1                  |
|                    | Aachen, DEU, VI            | 3T Siemens Trio                | 240x240            | 170             | 1x1x1                  |
| ADHD-Mattos        | Rio de Janeiro, BRA        | 3T Philips Achieva             | 256x256            | 166             | 1.0156x1.0156x1.2      |
| ADHD-Rubia         | London, GBR                | 3T GE Signa                    | 320x320            | 172             | 1x1x1.2                |
| ADHD-Russia        | Moskou, RUS                | 3T GE medical systems Signa    | 256x256            | 240             | 0.9375x0.9375x1        |
| Clinic Barcelona   | Barcelona, ESP             | 3T Siemens Trio                | 256x256            | 180             | 1x1x1                  |
| Bergen-adultADHD   | Bergen, NOR                | 3T GE medical systems          | 256x256            | 180             | 1x1x1                  |
| Bergen-SVG         | Bergen, NOR                | 3T GE medical systems          | 240x240            | 160             | 1x1x1.1                |
| CAPS-UZH           | Zurich, CHE, I             | 3T Philips Achieva XT          | 270x254            | 176             | 1x1x1.1                |
|                    | Zurich, CHE, II            | 3T Philips Achieva XT          | 256x256            | 196             | 1.1x1.1x1.1            |
| DAT-london         | London, GBR                | 3T GE Medical systems Signa    | 256x256            | 176             | 0.8x0.8x1              |
| Dundee             | Dundee, GBR                | 3T Siemens Trio                | 256x256            | 120             | 0.875x0.875x1.2        |
| EPOD               | Amsterdam, NLD, I          | 3T Philips Intera              | 256x256            | 120             | 0.875x0.875x1.2        |
|                    | Amsterdam, NLD, II         | 3T Philips Achieva             | 208x256            | 176             | 1x1x1                  |
| Hartford-Olin      | Hartford,USA               | 3T Siemens Allegra             | 256x256            | 176             | 1x1x1                  |

|                |                  |                                     |         |     |                   |
|----------------|------------------|-------------------------------------|---------|-----|-------------------|
| IMpACT-NL      | Nijmegen, NLD    | 1.5T Siemens Avanto                 | 256x256 | 158 | 1x1x1.5           |
| MGH-ADHD       | New York, USA    | 1.5T Siemens Avanto                 | na      | 166 | 1x1x1.2           |
| MTA            | Irvine, USA, I   | 3T GE Medical systems Signa         | na      | 166 | 1x1x1.2           |
|                | Irvine, USA, II  | 3T GE Medical systems Discovery 750 | na      | 160 | 1x1x1.2           |
|                | Irvine, USA, III | 3T Siemens Trio                     | na      | 160 | 1x1x1.2           |
|                | Irvine, USA, IV  | 3T Siemens Trio                     | na      | 160 | 1x1x1.2           |
|                | Irvine, USA, V   | 3T Siemens Trio                     | na      | 160 | 1x1x1.2           |
|                | Irvine, USA, VI  | 3T Siemens Trio                     | 256x256 | 176 | 1x1x1             |
| NeuroImageADAM | Amsterdam, NLD   | 1.5T, Siemens Sonata                | 256x256 | 176 | 1x1x1             |
| NeuroImageNIJM | Nijmegen, NLD    | 1.5T Siemens Avanto                 | 256x232 | 176 | 0.9x0.9x0.9       |
| NICAP          | Victoria, AUS    | 3T Siemens Timtrio                  | 256x192 | 124 | 0.9375x0.9375x1.5 |
| NIH            | Bethesda, USA    | 1.5T GE Medical systems Signa       | 256x256 | 128 | 1x1x1.3           |
| NYU ADHD       | New York, USA    | 3T Siemens Allegra                  | 256x256 | 160 | 1x1x1.1           |
| OHSU2018       | Oregon, USA      | 3T Siemens TrioTim                  | 192x192 | 160 | 1.36x1.36x1.2     |
| SAOPAULO       | Sao Paulo, BRA   | 1.5T Siemens Espree                 | 256x240 | 192 | 1x1x1             |
| Sussex         | Sussex, GBR      | 1.5T Siemens Avanto                 | 256x256 | 176 | 1x1x1             |
| Tuebingen      | Tübingen, DEU    | 3T Siemens Prisma                   | 256x256 | 180 | 0.94x0.94x1       |
| UAB-ADHD       | Barcelona, ESP   | 3T Phillips Achieva                 | 256x256 | 96  | 0.86x0.86x1.6     |
| UCHZ           | Zurich, CHE      | 3T GE Medical Systems Signa         | 192x256 | 172 | 1x1x1             |
| ZI-CAPS        | Mannheim, DEU    | 3T Siemens TrioTim                  | 256x256 | 192 | 1x1x1             |

**Supplementary Table S2: imaging acquisition details ASD working group**

| <b>Name sample</b> | <b>Site/Country/Cohort</b> | <b>Scanner vendor and type</b> | <b>Matrix size</b> | <b>N slices</b> | <b>Voxel Size</b> |
|--------------------|----------------------------|--------------------------------|--------------------|-----------------|-------------------|
| ABIDE_CALTECH      | Pasadena, USA              | 3T Siemens Trio                | 256x256            | 176             | 1x1x1             |
| ABIDE_KKI          | Baltimore, USA             | 3T Philips Achieva             | 256x256            | 200             | 1x1x1             |
| ABIDE_LEUVEN_1     | Leuven, BEL, 1             | 3T Philips Interna             | 256x256            | 182             | 1x1x1             |
| ABIDE_LEUVEN_2     | Leuven, BEL, 2             | 3T Philips Interna             | 256x256            | 182             | 1x1x1             |
| ABIDE_MAX_MUN      | Munster, DEU               | 3T Siemens Verio               | 256x256            | 160             | 1x1x1             |
| ABIDE_NYU          | New-York, USA, 1           | 3T Siemens Allegra             | 256x256            | 128             | 1.3x1x1.3         |
| ABIDE_OLIN         | Hartford, USA, 1           | 3T Siemens Allegra             | 256x256            | 176             | 1x1x1             |
| ABIDE_PITT         | Pittsburgh, USA            | 3T Siemens Allegra             | 269x269            | 176             | 1x1x1             |
| ABIDE_SBL          | Groningen, NLD             | 3T Philips Interna             | 256x231            | 170             | 1x1x1             |
| ABIDE_SDSU         | San Diego, USA             | 3T GE MR750                    | 256x256            | 180             | 1x1x1             |
| ABIDE_STANFORD     | Stanford, USA              | 3T GR Signa                    | 256x256            | 132             | 0.859x1.5x0.859   |
| ABIDE_TCD          | Dublin, IRL                | 3T Philips Achieva             | 256x256            | 160             | 1x1x1             |
| ABIDE_UM_1         | Michigan, USA, 1           | 3T GE Signa                    | 256x256            | 128             | 1x1x1             |
| ABIDE_UM_2         | Michigan, USA, 2           | 3T GE Signa                    | 256x256            | 128             | 1x1x1             |
| ABIDE_USM          | Salt Lake City, USA        | 3T Siemens Trio                | 256x240            | 192             | 1x1x1.2           |
| ABIDE_YALE         | New Haven, USA             | 3T Siemens Trio                | 256x256            | 160             | 1x1x1             |
| ABIDEII-BNI_1      | Phoenix, USA               | 3T Philips Ingenia             | 244x227            | 170             | 1.11x1.11x1.2     |
| ABIDEII-EMC_1      | Rotterdam, NLD             | 3T GE MR750                    | 256x256            | 186             | 0.9x0.9x0.9       |
| ABIDEII-ETH_1      | Zurich, CHE                | 3T Philips Achieva             | 256x256            | 162             | 0.89x0.89x0.89    |
| ABIDEII-GU_1       | Georgetown, WA, USA        | 3T Siemens TrioTim             | 256x256            | 176             | 1x1x1             |
| ABIDEII-IP_1       | Paris, FRA                 | 3T Siemens TrioTim             | 256x256            | 170             | 1x1x1             |
| ABIDEII-IU_1       | Bloomington, USA           | 3T Philips Achieva             | 256x256            | 180             | 0.7x0.7x0.7       |
| ABIDEII-KKI_1      | Baltimore, USA             | 3T Philips Achieva             | 256x200            | 200             | 1x1x1             |
| ABIDEII-KUL        | Leuven, BEL, 3             | 3T Philips Achieva             | 256x256            | 182             | 1.2x1.2x1.2       |
| ABIDEII-NYU_1      | New-York, USA, 2           | 3T Siemens Allegra             | 256x256            | 128             | 1.3x1x1.3         |
| ABIDEII-NYU_2      | New-York, USA, 3           | 3T Siemens Allegra             | 256x256            | 128             | 1.3x1x1.3         |
| ABIDEII-OILH_2     | Hartford, USA, 2           | 3T Siemens Trio                | 256x256            | 208             | 0.8x0.8x0.8       |
| ABIDEII-SDSU_1     | San Diego, USA             | 3T GE MR750                    | 256x192            | 176             | 1x1x1             |

|                |                  |                       |         |     |                |
|----------------|------------------|-----------------------|---------|-----|----------------|
| ABIDEII-UCD_1  | Davis, CA, USA   | 3T Siemens TrioTim    | 256x256 | 192 | 1x1x1          |
| ABIDEII-UCLA_1 | Los Angeles, USA | 3T Siemens TrioTim    | 256x240 | 160 | 1x1x1.2        |
| ABIDEII-USM_1  | Miami, USA       | 3T Siemens TrioTim    | 256x256 | 220 | 1x1x1          |
| Barcelona      | Barcelona, ESP   | 3T Siemens Trio       | NA      | NA  | NA             |
| BRC            | London, GBR      | 3T GE Signa HDx       | 256x256 | 166 | 1x1x1          |
| CMU            | Pittsburg, USA   | 3T Siemens Trio       | 256x256 | NA  | 1x1x1          |
| FAIR           | Portland, USA    | 3T Siemens Trio       | 256x256 | 160 | 1x1x1.1        |
| FRANKFURT      | Frankfurt, DEU   | 1.5 T Siemens Sonata  | 256x240 | 160 | 1x1x1          |
| FSM            | Pisa, ITA        | 1.5T GE Signa         | NA      | NA  | 1x1x1          |
| MRC            | London, GBR      | 3T GE Signa HDx       | 256x256 | 176 | 1x1x1          |
| MYAD           | Marseille, FRA   | 1.5T Siemens Symphony | 256x256 | 160 | 1x1x1          |
| NIJMEGEN       | Nijmegen, NLD, 1 | 1.5T Siemens Avanto   | 256x256 | 160 | 1x1x1          |
|                | Nijmegen, NLD, 2 | 1.5T Siemens Avanto   | 256x256 | 176 | 1x1x1          |
|                | Nijmegen, NLD, 3 | 1.5T Siemens Avanto   | 256x256 | 176 | 1x1x1          |
| PHGGM          | Madrid, ESP      | 1.5T Philips Intera   | 256x256 | 176 | 1x1x1          |
| PITT           | Pittsburgh, USA  | 3T Siemens Allegra    | 256x256 | 176 | 1.05x1.05x1.05 |
| SAOPAULO       | Sao Paulo, BRA   | 3T Philips Achieva    | 192x192 | 160 | 1.36x1.36x1.2  |
| TCD            | Dublin, IRL      | 3T Philips Achieva    | 256x256 | 160 | 1x1x1          |
| TORONTO        | Toronto, CAN     | 3T Siemens Allegra    | 256x208 | 208 | 0.82x0.82x0.82 |
| UMCU           | Utrecht, NLD, 1  | 1.5T Philips Intera   | 256x256 | 130 | 1x1x1.5        |
|                | Utrecht, NLD, 2  | 1.5T Philips Intera   | 256x256 | 160 | 1x1x1.2        |

**Supplementary Table S3: imaging acquisition details OCD working group**

| PI/name sample | Site/Country/Cohort | Scanner vendor and type         | Matrix size | N slices | Voxel Size      |
|----------------|---------------------|---------------------------------|-------------|----------|-----------------|
| Arnold         | Ontario, CAN        | 3T Siemens Trio VB17            | 192x240     | 256      | 1x1x1           |
| Benedetti      | Milan, ITA          | 3T Philips Gyroscan Intera      | 256x256     | 220      | 1x1x1           |
| Beucke         | Berlin, GER         | 1.5T Siemens Sonata             | 256x224     | 176      | 1x1x1           |
| Brennan        | Massachusetts, USA  | 3T Siemens TrioTim syngo MR B17 | 256x256     | 128      | 1.3x1.0x1.3     |
| Buitelaar      | Nijmegen, NLD       | 3T Siemens PrismaFit            | 256x256     | 192      | 1x1x1           |
| Cheng          | Kunming, CHN I      | 1.5T GE Signa Excite            | 256x256     | 172      | 0.93x0.93x0.9   |
|                | Kunming, CHN II     | 3T Philips Achieva              | 228x228     | 230      | 1.1x1.1x0.6     |
| Denys          | Amsterdam, NLD      | 3T Philips Intera               | 256x256     | 182/180  | 1x0.5x0.5       |
| Fitzgerald     | Michigan, USA       | 3T GE Signa                     | 256x256     | 124      | 1.02x1.02x1.2   |
| Gruner         | Connecticut, USA    | 3T GE Signa                     | 256x256     | 216      | 0.976x0.976x1.0 |
| van den Heuvel | Amsterdam, NLD I    | 1.5T Siemens Sonata             | 256x160     | 160      | 1x1x1.5         |
|                | Amsterdam, NLD II   | 3T GE Healthcare Signa HDxt     | 256x256     | 172      | 1x0.977x0.977   |
| Hirano         | Chiba, JPN I        | 3T GE Discovery MR750           | 256x256     | 178      | 1x1x1           |
|                | Chiba, JPN II       | 3T GE Discovery MR750           | 256x256     | 178      | 1x1x1           |
| Hoexter        | Sao Paulo, BRA I    | 1.5T GE Signa                   | 256x192     | 248      | 0.94x0.94x0.80  |
|                | Sao Paulo, BRA II   | 3T Philips Achieva              | 256x256     | 208      | 1x0.977x0.977   |
| Huysen         | Amsterdam, NLD      | 3T Philips Intera MR            | 256x256     | 182      | 1x1x1.2         |
| James          | Oxford, GBR         | 1.5T Siemens Sonata             | 256x256     | 208      | 1x1x1           |
| Koch           | Munche, GER         | 3T Philips Ingenia              | 240x240     | 170      | 1x1x1           |
| Kvale          | Bergen, NOR         | 3T GE Discovery MR750           | 256x256     | 192      | 1x1x1           |
| Kwon           | Seoul, KOR I        | 1.5T GE Signa                   | 256x256     | 124      | 0.82x0.82x1.5   |
|                | Seoul, KOR II       | 1.5T Siemens Avanto             | 416x512     | 160-208  | 0.45x0.45x0.9   |
|                | Seoul, KOR III      | 3T Siemens Trio                 | 256x256     | 208      | 1x0.977x0.977   |
| Lazaro         | Barcelona, ESP I    | 1.5T GE Signa LX                | 256x256     | 128      | 1x1x1           |
|                | Barcelona, ESP II   | 3T Siemens TrioTim              | 256x256     | 240      | 1x1x1           |

|               |                       |                              |         |     |                 |
|---------------|-----------------------|------------------------------|---------|-----|-----------------|
| Mataix-Cols   | Stockholm, SWE        | 1.5T GE Signa/HDx            | 256x256 | 124 | 0.94x0.94x1.5   |
| Menchon       | Barcelona, ESP        | 1.5T GE Signa Excite         | 256x256 | 130 | 1.2x1.2x1.2     |
| Morgado       | Braga, PRT            | 1.5T Siemens Avanto          | 256x256 | 176 | 1x1x1           |
| Nakamae       | Kyoto, JPN I          | 1.5T Philips Gyroscan Intera | 256x256 | 130 | 0.98x0.98x1.5   |
|               | Kyoto, JPN II         | 3T Philips Gyroscan Intera   | 256x256 | 170 | 1x1x1           |
| Nakao         | Fukuoka, JPN          | 3T Philips Achieva TX        | 240x240 | 190 | 1.8x1.8x1.8     |
| Nurmi         | California, USA I     | 3T Siemens Trio              | 256x256 | 176 | 1x1x1           |
|               | California, USA II    | 3T Siemens Trio              | 256x256 | 176 | 1x1x1           |
| Reddy         | Bangalore, IND I      | 1.5T Siemens Vision          | 256x160 | 160 | 0.98x0.98x1     |
|               | Bangalore, IND II     | 3T Siemens Skyra             | 256x256 | 192 | 1x1x1           |
|               | Bangalore, IND III    | 3T Philips Achieva           | 256x256 | 165 | 1x1x1           |
| Simpson/Marsh | New York, USA         | 3T GE Signa                  | 256x256 | 164 | 0.976x0.976x1.0 |
|               | New York, USA         | 3T GE Signa                  | 512x512 | na  | na              |
| Soreni        | Ontario, CAN          | 3T GE Excite                 | 512x512 | 148 | 0.468x0.469x1   |
| Spalletta     | Rome, ITA             | 3T Siemens Allegra           | 256x256 | 176 | 1x1x1           |
| Stein         | Cape Town, ZAF        | 3T Siemens Allegra           | 256x256 | 160 | 1.3x1.0x1.0     |
| Stern         | New York, USA         | 3T Siemens Allegra           | 256x256 | 208 | 0.82x0.82x0.82  |
| Stewart       | British Columbia, CAN | 3T GE Discovery 750          | 256x256 | 164 | 1x1x1           |
| Tolin         | Connecticut, USA      | 3T Siemens Allegra           | 64x64   | 29  | 1x1x1           |
| Walitza       | Zurich, CHE I         | 3T Philips Achieva           | 240x240 | 160 | 1x1x1           |
|               | Zurich, CHE II        | 3T Philips Achieva           | 240x240 | 160 | 1x1x1           |
| Wang          | Shanghai, CHN         | 3T Siemens Verio             | 256x256 | 192 | 1x1x1           |

**Supplementary Table S4:** demographics, clinical characteristics, age, sex, and numbers breakdown separately for patient groups and control subjects for the full sample

| ALL        |      | OCD (N total patients=2323)   |        |       | ADHD (N total patients=2271)  |        |       | ASD (N total patients=1777)   |        |       | controls (N total controls= 5827) |        |       |
|------------|------|-------------------------------|--------|-------|-------------------------------|--------|-------|-------------------------------|--------|-------|-----------------------------------|--------|-------|
|            |      | number of sites included (47) |        |       | number of sites included (46) |        |       | number of sites included (55) |        |       | number of sites included (139)    |        |       |
|            |      | data available for N patients | mean   | sd    | data available for N patients | mean   | sd    | data available for N patients | mean   | sd    | data available for N subjects     | mean   | sd    |
| age        |      | 2323                          | 27.80  | 11.40 | 2271                          | 19.04  | 11.29 | 1777                          | 15.26  | 8.70  | 5827                              | 20.57  | 11.59 |
| IQ         |      | 614                           | 106.47 | 13.88 | 2021                          | 105.29 | 14.89 | 1432                          | 103.74 | 19.24 | 3836                              | 111.27 | 13.95 |
|            |      | numbers with available data   | N      | %     | numbers with available data   | N      | %     | numbers with available data   | N      | %     | numbers with available data       | N      | %     |
| male       |      | 2323                          | 1194   | 51.40 | 2271                          | 1666   | 73.36 | 1777                          | 1512   | 85.09 | 5827                              | 3568   | 61.23 |
| medication |      | 2300                          | 1039   | 45.17 | 1575                          | 457    | 29.02 | 866                           | 217    | 25.06 | NA                                |        |       |
| comorbid   | OCD  | -                             | -      | -     | 1647                          | 3      | 0.18  | 257                           | 3      | 1.17  |                                   |        |       |
|            | ADHD | 1582                          | 92     | 5.82  | -                             | -      | -     | 257                           | 24     | 9.34  |                                   |        |       |
|            | ASD  | 1504                          | 14     | 0.93  | 930                           | 7      | 0.75  | -                             | -      | -     |                                   |        |       |
|            | TD   | 1615                          | 51     | 3.16  | 901                           | 6      | 0.67  | 257                           | 1      | 0.39  |                                   |        |       |
|            | Anx  | 1936                          | 426    | 22.00 | 1628                          | 42     | 2.58  | 257                           | 7      | 2.72  |                                   |        |       |
|            | Dep  | 1959                          | 224    | 11.43 | 1587                          | 12     | 0.76  | 257                           | 9      | 3.50  |                                   |        |       |

Abbreviations: sd= standard deviation; TD = Tourette's Disorder; Anx = Anxiety Disorder; Dep= Major Depressive Disorder

**Supplementary Table S5:** mega-analytic results for each subcortical structure comparing pediatric ADHD, ASD and OCD patients to healthy control subjects, controlling for age, sex, ICV, and scan site.

| ROI         | OCD vs HC    |              |              |               |   | Leave-site out crossvalidation |             |       | ADHD vs HC  |              |              |              |               | Leave-site out crossvalidation |               |       |       |       |
|-------------|--------------|--------------|--------------|---------------|---|--------------------------------|-------------|-------|-------------|--------------|--------------|--------------|---------------|--------------------------------|---------------|-------|-------|-------|
|             | Effect size  | P-value      | FDR P-value  | 95% CI        |   | p-mean                         | p-min       | p-max | Effect size | P-value      | FDR P-value  | 95% CI       |               | p-mean                         | p-min         | p-max |       |       |
| thalamus    | 0.08         | 0.280        | 0.393        | -0.064        | - | 0.222                          | 0.05        | 0.02  | 0.25        | 0.05         | 0.170        | 0.170        | -0.022        | -                              | 0.125         | 0.162 | 0.145 | 0.185 |
| caudate     | -0.10        | 0.292        | 0.393        | -0.293        | - | 0.088                          | 0.29        | 0.04  | 0.14        | <b>-0.09</b> | <b>0.048</b> | <b>0.064</b> | <b>-0.181</b> | -                              | <b>-0.001</b> | 0.046 | 0.026 | 0.090 |
| putamen     | 0.10         | 0.264        | 0.393        | -0.077        | - | 0.280                          | 0.28        | 0.18  | 0.56        | <b>-0.13</b> | <b>0.002</b> | <b>0.008</b> | <b>-0.212</b> | -                              | <b>-0.045</b> | 0.003 | 0.001 | 0.009 |
| pallidum    | -0.06        | 0.543        | 0.621        | -0.247        | - | 0.130                          | 0.55        | 0.12  | 0.55        | -0.07        | 0.104        | 0.119        | -0.155        | -                              | 0.014         | 0.103 | 0.056 | 0.184 |
| hippocampus | 0.14         | 0.064        | 0.256        | -0.008        | - | 0.296                          | 0.07        | 0.19  | 0.92        | <b>-0.08</b> | <b>0.036</b> | <b>0.058</b> | <b>-0.150</b> | -                              | <b>-0.005</b> | 0.036 | 0.014 | 0.075 |
| amygdala    | 0.14         | 0.295        | 0.393        | -0.120        | - | 0.396                          | 0.05        | 0.02  | 0.16        | <b>-0.10</b> | <b>0.011</b> | <b>0.022</b> | <b>-0.174</b> | -                              | <b>-0.022</b> | 0.013 | 0.005 | 0.089 |
| accumbens   | 0.02         | 0.788        | 0.788        | -0.156        | - | 0.206                          | 0.80        | 0.02  | 0.56        | <b>-0.13</b> | <b>0.003</b> | <b>0.008</b> | <b>-0.215</b> | -                              | <b>-0.044</b> | 0.003 | 0.001 | 0.006 |
| ICV         | 0.15         | 0.053        | 0.256        | -0.002        | - | 0.303                          | <b>0.06</b> | 0.60  | 0.90        | <b>-0.13</b> | <b>0.001</b> | <b>0.008</b> | <b>-0.199</b> | -                              | <b>-0.055</b> | 0.056 | 0.017 | 0.255 |
| ROI         | ASD vs HC    |              |              |               |   | Leave-site out crossvalidation |             |       |             |              |              |              |               |                                |               |       |       |       |
|             | Effect size  | P-value      | FDR P-value  | 95% CI        |   | p-mean                         | p-min       | p-max |             |              |              |              |               |                                |               |       |       |       |
| thalamus    | -0.01        | 0.842        | 0.842        | -0.109        | - | 0.089                          | 0.323       | 0.287 | 0.349       |              |              |              |               |                                |               |       |       |       |
| caudate     | -0.03        | 0.498        | 0.752        | -0.118        | - | 0.057                          | 0.511       | 0.484 | 0.567       |              |              |              |               |                                |               |       |       |       |
| putamen     | -0.03        | 0.564        | 0.752        | -0.148        | - | 0.081                          | 0.487       | 0.466 | 0.533       |              |              |              |               |                                |               |       |       |       |
| pallidum    | -0.02        | 0.691        | 0.790        | -0.100        | - | 0.066                          | 0.596       | 0.568 | 0.635       |              |              |              |               |                                |               |       |       |       |
| hippocampus | -0.05        | 0.215        | 0.430        | -0.116        | - | 0.026                          | 0.264       | 0.245 | 0.280       |              |              |              |               |                                |               |       |       |       |
| amygdala    | <b>-0.09</b> | <b>0.022</b> | <b>0.176</b> | <b>-0.161</b> | - | <b>-0.012</b>                  | 0.053       | 0.050 | 0.055       |              |              |              |               |                                |               |       |       |       |
| accumbens   | -0.09        | 0.153        | 0.408        | -0.218        | - | 0.034                          | 0.120       | 0.111 | 0.131       |              |              |              |               |                                |               |       |       |       |
| ICV         | 0.10         | 0.122        | 0.408        | -0.027        | - | 0.231                          | 0.133       | 0.125 | 0.153       |              |              |              |               |                                |               |       |       |       |

Significant results, corrected for multiple comparisons (FDR P-value  $\leq 0.05$ ), are color-coded red; trend significant results (nominal P-value  $< 0.05$ ) are color-coded orange.

A negative Effect size indicates a smaller volume of region x in patient group y versus healthy controls; a positive Effect size indicates a larger volume of region x in patient group y versus healthy controls.

Leave-site-out crossvalidation shows the resulting p-value distribution after a crossvalidation loop has been run over all sites, consisting of the mean, min and max p-values obtained.

**Supplementary Table S6:** mega-analytic results for cortical thickness of each structure comparing pediatric ADHD, ASD and OCD patients to healthy control subjects, controlling for age, sex and scan site.

| ROI                              | OCD vs HC    |              |              |               |   | Leave-site out crossvalidation |       |       | ADHD vs HC  |              |              |              |               | Leave-site out crossvalidation |               |       |       |       |
|----------------------------------|--------------|--------------|--------------|---------------|---|--------------------------------|-------|-------|-------------|--------------|--------------|--------------|---------------|--------------------------------|---------------|-------|-------|-------|
|                                  | Effect size  | P-value      | FDR P-value  | 95% CI        |   | p-mean                         | p-min | p-max | Effect size | P-value      | FDR P-value  | 95% CI       |               | p-mean                         | p-min         | p-max |       |       |
| banks superior temporal sulcus   | -0.10        | 0.358        | 0.609        | -0.321        | - | 0.116                          | 0.367 | 0.131 | 0.716       | -0.03        | 0.566        | 0.861        | -0.133        | -                              | 0.073         | 0.565 | 0.425 | 0.684 |
| caudal anterior cingulate cortex | 0.05         | 0.664        | 0.801        | -0.159        | - | 0.250                          | 0.673 | 0.480 | 0.997       | -0.02        | 0.749        | 0.903        | -0.111        | -                              | 0.080         | 0.741 | 0.391 | 0.997 |
| caudal middle frontal gyrus      | -0.18        | 0.075        | 0.565        | -0.375        | - | 0.018                          | 0.082 | 0.027 | 0.265       | -0.05        | 0.330        | 0.679        | -0.139        | -                              | 0.047         | 0.334 | 0.216 | 0.658 |
| cuneus cortex                    | -0.05        | 0.615        | 0.769        | -0.243        | - | 0.144                          | 0.629 | 0.334 | 0.956       | -0.04        | 0.454        | 0.768        | -0.127        | -                              | 0.057         | 0.471 | 0.249 | 0.684 |
| entorhinal cortex                | 0.06         | 0.529        | 0.686        | -0.134        | - | 0.262                          | 0.528 | 0.328 | 0.965       | -0.04        | 0.371        | 0.721        | -0.127        | -                              | 0.047         | 0.383 | 0.294 | 0.495 |
| fusiform gyrus                   | -0.01        | 0.894        | 0.920        | -0.209        | - | 0.183                          | 0.891 | 0.571 | 0.999       | <b>-0.14</b> | <b>0.003</b> | <b>0.053</b> | <b>-0.227</b> | -                              | <b>-0.045</b> | 0.003 | 0.002 | 0.005 |
| inferior parietal cortex         | <b>-0.23</b> | <b>0.028</b> | <b>0.565</b> | <b>-0.435</b> | - | <b>-0.024</b>                  | 0.030 | 0.013 | 0.064       | -0.06        | 0.241        | 0.562        | -0.150        | -                              | 0.038         | 0.243 | 0.206 | 0.351 |
| inferior temporal gyrus          | -0.01        | 0.893        | 0.920        | -0.204        | - | 0.178                          | 0.883 | 0.645 | 0.982       | -0.05        | 0.278        | 0.608        | -0.138        | -                              | 0.040         | 0.278 | 0.179 | 0.394 |
| isthmus cingulate cortex         | 0.14         | 0.198        | 0.565        | -0.071        | - | 0.343                          | 0.198 | 0.109 | 0.548       | 0.01         | 0.934        | 0.961        | -0.146        | -                              | 0.159         | 0.726 | 0.402 | 1.000 |
| lateral occipital cortex         | -0.07        | 0.490        | 0.660        | -0.263        | - | 0.126                          | 0.496 | 0.300 | 0.869       | <b>-0.10</b> | <b>0.034</b> | <b>0.298</b> | <b>-0.188</b> | -                              | <b>-0.008</b> | 0.037 | 0.023 | 0.064 |
| lateral orbitofrontal cortex     | -0.07        | 0.449        | 0.655        | -0.250        | - | 0.110                          | 0.454 | 0.212 | 0.729       | 0.00         | 0.979        | 0.979        | -0.086        | -                              | 0.083         | 0.963 | 0.725 | 0.994 |
| lingual gyrus                    | 0.08         | 0.414        | 0.630        | -0.105        | - | 0.255                          | 0.413 | 0.227 | 0.686       | -0.08        | 0.070        | 0.363        | -0.164        | -                              | 0.006         | 0.070 | 0.042 | 0.097 |
| medial orbitofrontal cortex      | -0.10        | 0.256        | 0.609        | -0.283        | - | 0.076                          | 0.263 | 0.142 | 0.608       | 0.03         | 0.523        | 0.832        | -0.057        | -                              | 0.111         | 0.533 | 0.288 | 0.930 |
| middle temporal gyrus            | -0.14        | 0.185        | 0.565        | -0.340        | - | 0.066                          | 0.187 | 0.040 | 0.402       | -0.01        | 0.824        | 0.915        | -0.106        | -                              | 0.085         | 0.820 | 0.672 | 0.891 |
| parahippocampal gyrus            | 0.02         | 0.813        | 0.918        | -0.180        | - | 0.229                          | 0.810 | 0.563 | 0.975       | -0.09        | 0.070        | 0.363        | -0.183        | -                              | 0.007         | 0.072 | 0.056 | 0.116 |
| paracentral lobule               | -0.11        | 0.296        | 0.609        | -0.307        | - | 0.094                          | 0.304 | 0.137 | 0.831       | -0.07        | 0.170        | 0.541        | -0.161        | -                              | 0.028         | 0.175 | 0.099 | 0.300 |
| pars opercularis                 | -0.09        | 0.383        | 0.609        | -0.297        | - | 0.114                          | 0.389 | 0.132 | 0.657       | -0.09        | 0.083        | 0.363        | -0.182        | -                              | 0.011         | 0.085 | 0.064 | 0.154 |
| pars orbitalis                   | -0.10        | 0.348        | 0.609        | -0.294        | - | 0.103                          | 0.366 | 0.217 | 0.533       | 0.01         | 0.774        | 0.903        | -0.080        | -                              | 0.108         | 0.784 | 0.618 | 0.935 |
| pars triangularis                | -0.14        | 0.150        | 0.565        | -0.340        | - | 0.052                          | 0.159 | 0.088 | 0.379       | -0.02        | 0.664        | 0.903        | -0.113        | -                              | 0.072         | 0.656 | 0.454 | 0.774 |
| pericalcarine cortex             | 0.03         | 0.748        | 0.873        | -0.160        | - | 0.223                          | 0.758 | 0.455 | 0.973       | -0.06        | 0.220        | 0.555        | -0.147        | -                              | 0.034         | 0.213 | 0.114 | 0.344 |
| postcentral gyrus                | -0.01        | 0.945        | 0.945        | -0.215        | - | 0.200                          | 0.911 | 0.482 | 0.988       | -0.07        | 0.154        | 0.539        | -0.167        | -                              | 0.026         | 0.163 | 0.127 | 0.276 |
| posterior cingulate cortex       | 0.14         | 0.175        | 0.565        | -0.063        | - | 0.345                          | 0.188 | 0.102 | 0.487       | 0.02         | 0.727        | 0.903        | -0.078        | -                              | 0.112         | 0.732 | 0.586 | 0.926 |
| precentral gyrus                 | -0.08        | 0.479        | 0.660        | -0.283        | - | 0.133                          | 0.486 | 0.225 | 0.898       | <b>-0.16</b> | <b>0.001</b> | <b>0.035</b> | <b>-0.255</b> | -                              | <b>-0.061</b> | 0.002 | 0.001 | 0.005 |

|                                   |              |              |              |               |   |                                |       |       |       |              |              |              |               |   |               |       |       |       |  |
|-----------------------------------|--------------|--------------|--------------|---------------|---|--------------------------------|-------|-------|-------|--------------|--------------|--------------|---------------|---|---------------|-------|-------|-------|--|
| precuneus cortex                  | -0.17        | 0.091        | 0.565        | -0.369        | - | 0.027                          | 0.099 | 0.041 | 0.267 | -0.08        | 0.078        | 0.363        | -0.179        | - | 0.010         | 0.082 | 0.062 | 0.125 |  |
| rostral anterior cingulate cortex | -0.14        | 0.146        | 0.565        | -0.326        | - | 0.048                          | 0.155 | 0.080 | 0.572 | 0.06         | 0.452        | 0.768        | -0.095        | - | 0.213         | 0.245 | 0.141 | 0.633 |  |
| rostral middle frontal gyrus      | -0.10        | 0.283        | 0.609        | -0.273        | - | 0.080                          | 0.295 | 0.175 | 0.486 | -0.02        | 0.594        | 0.866        | -0.106        | - | 0.060         | 0.589 | 0.350 | 0.728 |  |
| superior frontal gyrus            | -0.14        | 0.152        | 0.565        | -0.325        | - | 0.051                          | 0.160 | 0.069 | 0.434 | 0.01         | 0.837        | 0.915        | -0.078        | - | 0.097         | 0.841 | 0.648 | 1.000 |  |
| superior parietal cortex          | -0.18        | 0.069        | 0.565        | -0.380        | - | 0.014                          | 0.073 | 0.015 | 0.200 | -0.06        | 0.211        | 0.555        | -0.151        | - | 0.033         | 0.217 | 0.164 | 0.312 |  |
| superior temporal gyrus           | -0.10        | 0.324        | 0.609        | -0.296        | - | 0.098                          | 0.324 | 0.167 | 0.536 | -0.02        | 0.718        | 0.903        | -0.108        | - | 0.075         | 0.718 | 0.570 | 0.896 |  |
| supramarginal gyrus               | -0.17        | 0.106        | 0.565        | -0.371        | - | 0.036                          | 0.112 | 0.045 | 0.278 | -0.06        | 0.222        | 0.555        | -0.151        | - | 0.035         | 0.224 | 0.135 | 0.306 |  |
| frontal pole                      | 0.11         | 0.289        | 0.609        | -0.090        | - | 0.301                          | 0.291 | 0.145 | 0.455 | -0.01        | 0.909        | 0.961        | -0.098        | - | 0.087         | 0.895 | 0.556 | 0.990 |  |
| temporal pole                     | 0.02         | 0.868        | 0.920        | -0.177        | - | 0.210                          | 0.878 | 0.686 | 0.974 | <b>-0.10</b> | <b>0.028</b> | <b>0.298</b> | <b>-0.193</b> | - | <b>-0.011</b> | 0.028 | 0.014 | 0.051 |  |
| transverse temporal cortex        | -0.09        | 0.370        | 0.609        | -0.288        | - | 0.107                          | 0.373 | 0.251 | 0.900 | 0.04         | 0.461        | 0.768        | -0.058        | - | 0.129         | 0.473 | 0.342 | 0.778 |  |
| insula                            | -0.12        | 0.210        | 0.565        | -0.313        | - | 0.069                          | 0.216 | 0.091 | 0.547 | -0.02        | 0.679        | 0.903        | -0.107        | - | 0.070         | 0.674 | 0.487 | 0.953 |  |
| average thickness                 | -0.13        | 0.179        | 0.565        | -0.324        | - | 0.060                          | 0.182 | 0.076 | 0.362 | -0.07        | 0.117        | 0.455        | -0.164        | - | 0.018         | 0.119 | 0.073 | 0.182 |  |
| ROI                               | ASD vs HC    |              |              |               |   | Leave-site out crossvalidation |       |       |       |              |              |              |               |   |               |       |       |       |  |
|                                   | Effect size  | P-value      | FDR P-value  | 95% CI        |   | p-mean                         | p-min | p-max |       |              |              |              |               |   |               |       |       |       |  |
| banks superior temporal sulcus    | -0.13        | 0.087        | 0.160        | -0.285        | - | 0.019                          | 0.116 | 0.101 | 0.121 |              |              |              |               |   |               |       |       |       |  |
| caudal anterior cingulate cortex  | -0.11        | 0.192        | 0.269        | -0.285        | - | 0.057                          | 0.172 | 0.159 | 0.183 |              |              |              |               |   |               |       |       |       |  |
| caudal middle frontal gyrus       | -0.14        | 0.138        | 0.210        | -0.316        | - | 0.044                          | 0.167 | 0.147 | 0.178 |              |              |              |               |   |               |       |       |       |  |
| cuneus cortex                     | 0.00         | 0.994        | 0.994        | -0.171        | - | 0.170                          | 0.655 | 0.614 | 0.692 |              |              |              |               |   |               |       |       |       |  |
| entorhinal cortex                 | <b>-0.23</b> | <b>0.003</b> | <b>0.053</b> | <b>-0.380</b> | - | <b>-0.081</b>                  | 0.009 | 0.007 | 0.009 |              |              |              |               |   |               |       |       |       |  |
| fusiform gyrus                    | <b>-0.23</b> | <b>0.005</b> | <b>0.058</b> | <b>-0.390</b> | - | <b>-0.068</b>                  | 0.009 | 0.009 | 0.010 |              |              |              |               |   |               |       |       |       |  |
| inferior parietal cortex          | -0.14        | 0.137        | 0.210        | -0.331        | - | 0.045                          | 0.162 | 0.155 | 0.167 |              |              |              |               |   |               |       |       |       |  |
| inferior temporal gyrus           | <b>-0.19</b> | <b>0.036</b> | <b>0.118</b> | <b>-0.369</b> | - | <b>-0.013</b>                  | 0.053 | 0.051 | 0.058 |              |              |              |               |   |               |       |       |       |  |
| isthmus cingulate cortex          | 0.05         | 0.348        | 0.420        | -0.051        | - | 0.144                          | 0.593 | 0.574 | 0.617 |              |              |              |               |   |               |       |       |       |  |
| lateral occipital cortex          | -0.17        | 0.066        | 0.142        | -0.347        | - | 0.011                          | 0.175 | 0.154 | 0.210 |              |              |              |               |   |               |       |       |       |  |
| lateral orbitofrontal cortex      | -0.12        | 0.120        | 0.200        | -0.271        | - | 0.031                          | 0.129 | 0.126 | 0.132 |              |              |              |               |   |               |       |       |       |  |
| lingual gyrus                     | -0.07        | 0.404        | 0.456        | -0.221        | - | 0.089                          | 0.407 | 0.384 | 0.425 |              |              |              |               |   |               |       |       |       |  |

|                                   |              |              |              |               |   |               |       |       |       |
|-----------------------------------|--------------|--------------|--------------|---------------|---|---------------|-------|-------|-------|
| medial orbitofrontal cortex       | -0.06        | 0.504        | 0.535        | -0.252        | - | 0.124         | 0.515 | 0.504 | 0.526 |
| middle temporal gyrus             | <b>-0.23</b> | <b>0.009</b> | <b>0.063</b> | <b>-0.405</b> | - | <b>-0.056</b> | 0.014 | 0.013 | 0.015 |
| parahippocampal gyrus             | <b>-0.18</b> | <b>0.012</b> | <b>0.070</b> | <b>-0.315</b> | - | <b>-0.039</b> | 0.020 | 0.019 | 0.021 |
| paracentral lobule                | -0.14        | 0.065        | 0.142        | -0.280        | - | 0.008         | 0.086 | 0.084 | 0.088 |
| pars opercularis                  | <b>-0.19</b> | <b>0.033</b> | <b>0.118</b> | <b>-0.362</b> | - | <b>-0.015</b> | 0.043 | 0.041 | 0.044 |
| pars orbitalis                    | -0.10        | 0.258        | 0.334        | -0.264        | - | 0.071         | 0.279 | 0.241 | 0.305 |
| pars triangularis                 | -0.18        | 0.081        | 0.158        | -0.376        | - | 0.022         | 0.102 | 0.093 | 0.111 |
| pericalcarine cortex              | <b>0.11</b>  | <b>0.017</b> | <b>0.085</b> | <b>0.020</b>  | - | <b>0.199</b>  | 0.175 | 0.172 | 0.184 |
| postcentral gyrus                 | <b>-0.11</b> | <b>0.025</b> | <b>0.109</b> | <b>-0.205</b> | - | <b>-0.013</b> | 0.079 | 0.076 | 0.081 |
| posterior cingulate cortex        | -0.07        | 0.421        | 0.460        | -0.242        | - | 0.101         | 0.367 | 0.342 | 0.383 |
| precentral gyrus                  | <b>-0.19</b> | <b>0.008</b> | <b>0.063</b> | <b>-0.333</b> | - | <b>-0.051</b> | 0.016 | 0.015 | 0.017 |
| precuneus cortex                  | -0.12        | 0.214        | 0.288        | -0.304        | - | 0.068         | 0.352 | 0.343 | 0.357 |
| rostral anterior cingulate cortex | -0.07        | 0.333        | 0.416        | -0.219        | - | 0.074         | 0.354 | 0.337 | 0.360 |
| rostral middle frontal gyrus      | -0.09        | 0.378        | 0.441        | -0.285        | - | 0.108         | 0.420 | 0.383 | 0.457 |
| superior frontal gyrus            | -0.13        | 0.144        | 0.210        | -0.300        | - | 0.044         | 0.157 | 0.145 | 0.167 |
| superior parietal cortex          | <b>-0.17</b> | <b>0.037</b> | <b>0.118</b> | <b>-0.331</b> | - | <b>-0.010</b> | 0.049 | 0.048 | 0.051 |
| superior temporal gyrus           | -0.16        | 0.097        | 0.170        | -0.354        | - | 0.029         | 0.081 | 0.078 | 0.083 |
| supramarginal gyrus               | -0.18        | 0.062        | 0.142        | -0.377        | - | 0.009         | 0.074 | 0.067 | 0.077 |
| frontal pole                      | -0.05        | 0.537        | 0.553        | -0.215        | - | 0.112         | 0.530 | 0.469 | 0.573 |
| temporal pole                     | <b>-0.24</b> | <b>0.001</b> | <b>0.035</b> | <b>-0.371</b> | - | <b>-0.099</b> | 0.000 | 0.000 | 0.000 |
| transverse temporal cortex        | -0.19        | 0.054        | 0.142        | -0.392        | - | 0.004         | 0.037 | 0.035 | 0.039 |
| insula                            | -0.13        | 0.069        | 0.142        | -0.276        | - | 0.011         | 0.073 | 0.068 | 0.077 |
| average thickness                 | -0.20        | 0.056        | 0.142        | -0.400        | - | 0.005         | 0.071 | 0.069 | 0.072 |

Significant results, corrected for multiple comparisons (FDR P-value  $\leq 0.05$ ), are color-coded red; trend significant results (nominal P-value  $< 0.05$ ) are color-coded orange.

A negative Effect size indicates a thinner cortex of region x in patient group y versus healthy controls; a positive Effect size indicates a thicker cortex of region x in patient group y versus healthy controls.  
Leave-site-out crossvalidation shows the resulting p-value distribution after a crossvalidation loop has been run over all sites, consisting of the mean, min and max p-values obtained.

**Supplementary Table S7:** mega-analytic results for each subcortical structure comparing adolescent ADHD, ASD and OCD patients to healthy control subjects, controlling for age, sex, ICV, and scan site.

| ROI         | OCD vs HC   |         |             |                | Leave-site out crossvalidation |        |       | ADHD vs HC  |         |             |                 | Leave-site out crossvalidation |       |       |  |  |
|-------------|-------------|---------|-------------|----------------|--------------------------------|--------|-------|-------------|---------|-------------|-----------------|--------------------------------|-------|-------|--|--|
|             | Effect size | P-value | FDR P-value | 95% CI         | p-mean                         | p-min  | p-max | Effect size | P-value | FDR P-value | 95% CI          | p-mean                         | p-min | p-max |  |  |
| thalamus    | 0.11        | 0.030   | 0.240       | 0.011 - 0.211  | 0.034                          | 0.027  | 0.141 | 0.04        | 0.428   | 0.608       | -0.056 - 0.133  | 0.524                          | 0.456 | 0.859 |  |  |
| caudate     | 0.05        | 0.414   | 0.915       | -0.071 - 0.173 | 0.393                          | 0.176  | 0.560 | -0.05       | 0.402   | 0.608       | -0.158 - 0.063  | 0.461                          | 0.265 | 0.690 |  |  |
| putamen     | -0.01       | 0.91    | 0.915       | -0.126 - 0.112 | 0.956                          | 0.9120 | 0.975 | -0.05       | 0.334   | 0.608       | -0.156 - 0.053  | 0.300                          | 0.291 | 0.398 |  |  |
| pallidum    | -0.01       | 0.826   | 0.915       | -0.135 - 0.108 | 0.547                          | 0.188  | 0.920 | -0.07       | 0.186   | 0.608       | -0.173 - 0.034  | 0.103                          | 0.056 | 0.184 |  |  |
| hippocampus | 0.04        | 0.511   | 0.915       | -0.073 - 0.147 | 0.567                          | 0.522  | 0.663 | -0.01       | 0.873   | 0.873       | -0.106 - 0.090  | 0.844                          | 0.789 | 0.899 |  |  |
| amygdala    | 0.02        | 0.701   | 0.915       | -0.094 - 0.139 | 0.753                          | 0.620  | 0.959 | -0.03       | 0.558   | 0.638       | -0.132 - 0.071  | 0.521                          | 0.512 | 0.577 |  |  |
| accumbens   | -0.05       | 0.393   | 0.915       | -0.169 - 0.066 | 0.399                          | 0.312  | 0.496 | -0.04       | 0.456   | 0.608       | -0.145 - 0.065  | 0.451                          | 0.388 | 0.501 |  |  |
| ICV         | 0.01        | 0.915   | 0.915       | -0.114 - 0.127 | 0.916                          | 0.908  | 0.951 | -0.19       | 0.000   | 0.000       | -0.280 - -0.093 | 0.001                          | 0.000 | 0.002 |  |  |
| ROI         | ASD vs HC   |         |             |                | Leave-site out crossvalidation |        |       |             |         |             |                 |                                |       |       |  |  |
|             | Effect size | P-value | FDR P-value | 95% CI         | p-mean                         | p-min  | p-max |             |         |             |                 |                                |       |       |  |  |
| thalamus    | -0.05       | 0.238   | 0.476       | -0.124 - 0.031 | 0.323                          | 0.217  | 0.349 |             |         |             |                 |                                |       |       |  |  |
| caudate     | -0.08       | 0.114   | 0.304       | -0.172 - 0.018 | 0.111                          | 0.104  | 0.267 |             |         |             |                 |                                |       |       |  |  |
| putamen     | -0.12       | 0.08    | 0.304       | -0.259 - 0.014 | 0.048                          | 0.046  | 0.093 |             |         |             |                 |                                |       |       |  |  |
| pallidum    | -0.12       | 0.06    | 0.304       | -0.242 - 0.005 | 0.059                          | 0.056  | 0.063 |             |         |             |                 |                                |       |       |  |  |
| hippocampus | 0.01        | 0.801   | 0.842       | -0.095 - 0.123 | 0.841                          | 0.755  | 0.952 |             |         |             |                 |                                |       |       |  |  |
| amygdala    | -0.01       | 0.842   | 0.842       | -0.146 - 0.119 | 0.053                          | 0.050  | 0.055 |             |         |             |                 |                                |       |       |  |  |
| accumbens   | -0.07       | 0.463   | 0.617       | -0.257 - 0.117 | 0.444                          | 0.421  | 0.489 |             |         |             |                 |                                |       |       |  |  |
| ICV         | 0.04        | 0.433   | 0.617       | -0.057 - 0.134 | 0.388                          | 0.380  | 0.510 |             |         |             |                 |                                |       |       |  |  |

Significant results, corrected for multiple comparisons (FDR P-value  $\leq$  0.05), are color-coded red; trend significant results (nominal P-value < 0.05) are color-coded orange.

A negative Effect size indicates a smaller volume of region x in patient group y versus healthy controls; a positive Effect size indicates a larger volume of region x in patient group y versus healthy controls.

Leave-site-out crossvalidation shows the resulting p-value distribution after a crossvalidation loop has been run over all sites, consisting of the mean, min and max p-values obtained.

**Supplementary Table S8:** mega-analytic results for surface area of each structure comparing adolescent ADHD, ASD and OCD patients to healthy control subjects, controlling for age, sex, ICV, and scan site.

| ROI                              | OCD vs HC    |              |              |               |   | Leave-site out crossvalidation |       |       | ADHD vs HC  |              |              |              |               | Leave-site out crossvalidation |               |       |       |       |
|----------------------------------|--------------|--------------|--------------|---------------|---|--------------------------------|-------|-------|-------------|--------------|--------------|--------------|---------------|--------------------------------|---------------|-------|-------|-------|
|                                  | Effect size  | P-value      | FDR P-value  | 95% CI        |   | p-mean                         | p-min | p-max | Effect size | P-value      | FDR P-value  | 95% CI       |               | p-mean                         | p-min         | p-max |       |       |
| banks superior temporal sulcus   | -0.01        | 0.909        | 0.982        | -0.133        | - | 0.118                          | 0.925 | 0.539 | 0.981       | -0.01        | 0.828        | 0.856        | -0.105        | -                              | 0.084         | 0.541 | 0.457 | 0.965 |
| caudal anterior cingulate cortex | -0.07        | 0.263        | 0.837        | -0.195        | - | 0.053                          | 0.265 | 0.128 | 0.481       | -0.03        | 0.498        | 0.772        | -0.127        | -                              | 0.062         | 0.507 | 0.323 | 0.885 |
| caudal middle frontal gyrus      | -0.02        | 0.803        | 0.969        | -0.136        | - | 0.105                          | 0.797 | 0.544 | 0.954       | -0.08        | 0.081        | 0.627        | -0.175        | -                              | 0.010         | 0.084 | 0.052 | 0.194 |
| cuneus cortex                    | -0.06        | 0.297        | 0.866        | -0.187        | - | 0.057                          | 0.305 | 0.189 | 0.602       | -0.07        | 0.140        | 0.627        | -0.165        | -                              | 0.023         | 0.143 | 0.078 | 0.362 |
| entorhinal cortex                | 0.03         | 0.670        | 0.969        | -0.109        | - | 0.169                          | 0.635 | 0.425 | 0.932       | 0.03         | 0.533        | 0.772        | -0.069        | -                              | 0.134         | 0.547 | 0.191 | 0.989 |
| fusiform gyrus                   | -0.03        | 0.555        | 0.950        | -0.142        | - | 0.076                          | 0.563 | 0.271 | 0.978       | -0.04        | 0.407        | 0.772        | -0.119        | -                              | 0.048         | 0.415 | 0.328 | 0.872 |
| inferior parietal cortex         | -0.07        | 0.201        | 0.812        | -0.188        | - | 0.039                          | 0.205 | 0.112 | 0.434       | -0.02        | 0.578        | 0.772        | -0.109        | -                              | 0.061         | 0.584 | 0.494 | 0.955 |
| inferior temporal gyrus          | 0.03         | 0.652        | 0.969        | -0.104        | - | 0.165                          | 0.702 | 0.254 | 0.982       | <b>-0.12</b> | <b>0.022</b> | <b>0.627</b> | <b>-0.224</b> | -                              | <b>-0.017</b> | 0.082 | 0.018 | 0.385 |
| isthmus cingulate cortex         | 0.08         | 0.175        | 0.812        | -0.036        | - | 0.199                          | 0.163 | 0.050 | 0.339       | -0.06        | 0.214        | 0.681        | -0.149        | -                              | 0.033         | 0.212 | 0.123 | 0.356 |
| lateral occipital cortex         | 0.00         | 0.954        | 0.982        | -0.112        | - | 0.106                          | 0.942 | 0.586 | 0.994       | -0.06        | 0.179        | 0.627        | -0.142        | -                              | 0.026         | 0.184 | 0.115 | 0.357 |
| lateral orbitofrontal cortex     | -0.09        | 0.097        | 0.566        | -0.195        | - | 0.016                          | 0.107 | 0.029 | 0.352       | 0.02         | 0.557        | 0.772        | -0.057        | -                              | 0.106         | 0.564 | 0.436 | 0.872 |
| lingual gyrus                    | 0.02         | 0.781        | 0.969        | -0.108        | - | 0.144                          | 0.783 | 0.519 | 0.972       | -0.02        | 0.619        | 0.772        | -0.122        | -                              | 0.073         | 0.605 | 0.325 | 0.842 |
| medial orbitofrontal cortex      | <b>-0.20</b> | <b>0.000</b> | <b>0.000</b> | <b>-0.307</b> | - | <b>-0.094</b>                  | 0.000 | 0.000 | 0.011       | 0.02         | 0.657        | 0.772        | -0.063        | -                              | 0.100         | 0.655 | 0.332 | 0.982 |
| middle temporal gyrus            | -0.03        | 0.570        | 0.950        | -0.134        | - | 0.074                          | 0.584 | 0.432 | 0.977       | -0.01        | 0.798        | 0.856        | -0.090        | -                              | 0.069         | 0.782 | 0.414 | 0.974 |
| parahippocampal gyrus            | -0.01        | 0.910        | 0.982        | -0.133        | - | 0.119                          | 0.892 | 0.571 | 0.996       | 0.02         | 0.662        | 0.772        | -0.075        | -                              | 0.119         | 0.670 | 0.272 | 0.964 |
| paracentral lobule               | <b>-0.16</b> | <b>0.010</b> | <b>0.117</b> | <b>-0.283</b> | - | <b>-0.038</b>                  | 0.014 | 0.004 | 0.099       | 0.02         | 0.652        | 0.772        | -0.073        | -                              | 0.117         | 0.630 | 0.449 | 0.775 |
| pars opercularis                 | -0.01        | 0.850        | 0.982        | -0.136        | - | 0.112                          | 0.887 | 0.634 | 0.984       | -0.09        | 0.148        | 0.627        | -0.221        | -                              | 0.033         | 0.113 | 0.010 | 0.242 |
| pars orbitalis                   | -0.07        | 0.232        | 0.812        | -0.185        | - | 0.045                          | 0.245 | 0.081 | 0.652       | 0.04         | 0.418        | 0.772        | -0.052        | -                              | 0.126         | 0.418 | 0.257 | 0.636 |
| pars triangularis                | -0.06        | 0.335        | 0.902        | -0.182        | - | 0.062                          | 0.374 | 0.202 | 0.819       | -0.06        | 0.177        | 0.627        | -0.159        | -                              | 0.029         | 0.175 | 0.098 | 0.503 |
| pericalcarine cortex             | 0.00         | 0.988        | 0.988        | -0.130        | - | 0.128                          | 0.969 | 0.631 | 0.999       | -0.10        | 0.057        | 0.627        | -0.197        | -                              | 0.003         | 0.055 | 0.011 | 0.132 |
| postcentral gyrus                | -0.04        | 0.483        | 0.939        | -0.148        | - | 0.070                          | 0.494 | 0.246 | 0.899       | 0.02         | 0.583        | 0.772        | -0.060        | -                              | 0.106         | 0.578 | 0.430 | 0.908 |
| posterior cingulate cortex       | <b>-0.20</b> | <b>0.001</b> | <b>0.018</b> | <b>-0.312</b> | - | <b>-0.083</b>                  | 0.001 | 0.000 | 0.020       | -0.07        | 0.111        | 0.627        | -0.160        | -                              | 0.017         | 0.112 | 0.046 | 0.227 |
| precentral gyrus                 | 0.02         | 0.672        | 0.969        | -0.084        | - | 0.130                          | 0.641 | 0.448 | 0.956       | -0.01        | 0.879        | 0.879        | -0.088        | -                              | 0.076         | 0.867 | 0.499 | 1.000 |

|                                   |       |       |       |                |       |       |       |              |              |              |                        |       |       |       |
|-----------------------------------|-------|-------|-------|----------------|-------|-------|-------|--------------|--------------|--------------|------------------------|-------|-------|-------|
| precuneus cortex                  | 0.02  | 0.749 | 0.969 | -0.090 - 0.125 | 0.740 | 0.311 | 0.994 | -0.03        | 0.533        | 0.772        | -0.109 - 0.056         | 0.546 | 0.153 | 0.955 |
| rostral anterior cingulate cortex | -0.05 | 0.371 | 0.928 | -0.166 - 0.062 | 0.389 | 0.216 | 0.721 | -0.03        | 0.430        | 0.772        | -0.122 - 0.052         | 0.433 | 0.232 | 0.768 |
| rostral middle frontal gyrus      | -0.10 | 0.052 | 0.455 | -0.211 - 0.001 | 0.057 | 0.017 | 0.237 | -0.02        | 0.580        | 0.772        | -0.105 - 0.059         | 0.579 | 0.332 | 0.978 |
| superior frontal gyrus            | -0.09 | 0.096 | 0.566 | -0.189 - 0.015 | 0.108 | 0.039 | 0.340 | -0.06        | 0.148        | 0.627        | -0.135 - 0.020         | 0.151 | 0.094 | 0.272 |
| superior parietal cortex          | -0.02 | 0.770 | 0.969 | -0.130 - 0.097 | 0.789 | 0.365 | 0.950 | <b>-0.09</b> | <b>0.047</b> | <b>0.627</b> | <b>-0.176 - -0.001</b> | 0.051 | 0.024 | 0.130 |
| superior temporal gyrus           | 0.00  | 0.936 | 0.982 | -0.112 - 0.103 | 0.924 | 0.548 | 0.996 | 0.01         | 0.832        | 0.856        | -0.073 - 0.091         | 0.833 | 0.310 | 0.962 |
| supramarginal gyrus               | 0.04  | 0.452 | 0.939 | -0.070 - 0.158 | 0.454 | 0.189 | 0.831 | -0.03        | 0.468        | 0.772        | -0.116 - 0.053         | 0.477 | 0.363 | 0.665 |
| frontal pole                      | 0.06  | 0.403 | 0.939 | -0.074 - 0.184 | 0.406 | 0.192 | 0.999 | -0.04        | 0.384        | 0.772        | -0.145 - 0.056         | 0.398 | 0.085 | 0.587 |
| temporal pole                     | 0.02  | 0.726 | 0.969 | -0.107 - 0.153 | 0.756 | 0.497 | 0.994 | 0.01         | 0.814        | 0.856        | -0.089 - 0.113         | 0.810 | 0.616 | 0.981 |
| transverse temporal cortex        | 0.05  | 0.474 | 0.939 | -0.079 - 0.171 | 0.466 | 0.220 | 0.798 | 0.03         | 0.521        | 0.772        | -0.066 - 0.129         | 0.544 | 0.351 | 0.696 |
| insula                            | -0.07 | 0.212 | 0.812 | -0.175 - 0.039 | 0.220 | 0.102 | 0.576 | 0.03         | 0.460        | 0.772        | -0.050 - 0.111         | 0.465 | 0.365 | 0.665 |
| average thickness                 | -0.03 | 0.547 | 0.950 | -0.110 - 0.058 | 0.560 | 0.308 | 0.951 | -0.03        | 0.371        | 0.772        | -0.095 - 0.036         | 0.377 | 0.239 | 0.616 |

| ROI                              | ASD vs HC   |         |             |                | Leave-site out crossvalidation |       |       |
|----------------------------------|-------------|---------|-------------|----------------|--------------------------------|-------|-------|
|                                  | Effect size | P-value | FDR P-value | 95% CI         | p-mean                         | p-min | p-max |
| banks superior temporal sulcus   | -0.07       | 0.255   | 0.743       | -0.178 - 0.047 | 0.294                          | 0.257 | 0.240 |
| caudal anterior cingulate cortex | -0.05       | 0.371   | 0.743       | -0.145 - 0.054 | 0.425                          | 0.390 | 0.463 |
| caudal middle frontal gyrus      | -0.06       | 0.190   | 0.743       | -0.162 - 0.032 | 0.251                          | 0.228 | 0.278 |
| cuneus cortex                    | -0.03       | 0.705   | 0.886       | -0.162 - 0.110 | 0.701                          | 0.653 | 0.750 |
| entorhinal cortex                | 0.04        | 0.450   | 0.743       | -0.065 - 0.146 | 0.495                          | 0.434 | 0.556 |
| fusiform gyrus                   | -0.06       | 0.309   | 0.743       | -0.188 - 0.146 | 0.321                          | 0.293 | 0.342 |
| inferior parietal cortex         | -0.02       | 0.788   | 0.890       | -0.135 - 0.103 | 0.798                          | 0.757 | 0.850 |
| inferior temporal gyrus          | -0.04       | 0.651   | 0.876       | -0.202 - 0.126 | 0.369                          | 0.332 | 0.392 |
| isthmus cingulate cortex         | -0.02       | 0.712   | 0.886       | -0.113 - 0.077 | 0.974                          | 0.922 | 0.998 |
| lateral occipital cortex         | -0.01       | 0.881   | 0.934       | -0.143 - 0.123 | 0.924                          | 0.881 | 0.990 |
| lateral orbitofrontal cortex     | -0.07       | 0.364   | 0.743       | -0.210 - 0.077 | 0.336                          | 0.307 | 0.372 |
| lingual gyrus                    | -0.05       | 0.358   | 0.743       | -0.150 - 0.054 | 0.319                          | 0.273 | 0.340 |

|                                   |              |              |              |               |          |               |       |       |       |
|-----------------------------------|--------------|--------------|--------------|---------------|----------|---------------|-------|-------|-------|
| medial orbitofrontal cortex       | -0.09        | 0.128        | 0.743        | -0.206        | -        | 0.026         | 0.143 | 0.131 | 0.158 |
| middle temporal gyrus             | -0.05        | 0.382        | 0.743        | -0.162        | -        | 0.062         | 0.388 | 0.350 | 0.426 |
| parahippocampal gyrus             | 0.07         | 0.150        | 0.743        | -0.027        | -        | 0.176         | 0.381 | 0.352 | 0.406 |
| paracentral lobule                | 0.00         | 0.996        | 0.996        | -0.100        | -        | 0.099         | 0.989 | 0.910 | 1.000 |
| pars opercularis                  | -0.04        | 0.467        | 0.743        | -0.137        | -        | 0.063         | 0.433 | 0.402 | 0.463 |
| pars orbitalis                    | 0.02         | 0.638        | 0.876        | -0.071        | -        | 0.115         | 0.628 | 0.579 | 0.671 |
| pars triangularis                 | -0.07        | 0.178        | 0.743        | -0.167        | -        | 0.031         | 0.241 | 0.206 | 0.276 |
| pericalcarine cortex              | <b>-0.11</b> | <b>0.043</b> | <b>0.743</b> | <b>-0.212</b> | <b>-</b> | <b>-0.003</b> | 0.058 | 0.037 | 0.067 |
| postcentral gyrus                 | -0.07        | 0.270        | 0.743        | -0.198        | -        | 0.055         | 0.335 | 0.307 | 0.368 |
| posterior cingulate cortex        | -0.08        | 0.083        | 0.743        | -0.175        | -        | 0.011         | 0.168 | 0.145 | 0.185 |
| precentral gyrus                  | 0.00         | 0.951        | 0.979        | -0.083        | -        | 0.088         | 0.899 | 0.841 | 0.946 |
| precuneus cortex                  | -0.02        | 0.764        | 0.890        | -0.150        | -        | 0.110         | 0.821 | 0.770 | 0.857 |
| rostral anterior cingulate cortex | -0.05        | 0.453        | 0.743        | -0.176        | -        | 0.078         | 0.454 | 0.421 | 0.497 |
| rostral middle frontal gyrus      | -0.03        | 0.530        | 0.773        | -0.113        | -        | 0.058         | 0.555 | 0.522 | 0.597 |
| superior frontal gyrus            | -0.04        | 0.455        | 0.743        | -0.147        | -        | 0.066         | 0.471 | 0.439 | 0.510 |
| superior parietal cortex          | -0.04        | 0.420        | 0.743        | -0.129        | -        | 0.054         | 0.589 | 0.527 | 0.633 |
| superior temporal gyrus           | -0.03        | 0.506        | 0.770        | -0.112        | -        | 0.055         | 0.571 | 0.547 | 0.628 |
| supramarginal gyrus               | <b>-0.10</b> | <b>0.036</b> | <b>0.743</b> | <b>-0.184</b> | <b>-</b> | <b>-0.006</b> | 0.102 | 0.035 | 0.110 |
| frontal pole                      | 0.08         | 0.237        | 0.743        | -0.054        | -        | 0.217         | 0.244 | 0.212 | 0.301 |
| temporal pole                     | -0.04        | 0.423        | 0.743        | -0.148        | -        | 0.062         | 0.417 | 0.385 | 0.450 |
| transverse temporal cortex        | -0.02        | 0.734        | 0.886        | -0.149        | -        | 0.105         | 0.696 | 0.653 | 0.763 |
| insula                            | -0.01        | 0.853        | 0.933        | -0.132        | -        | 0.109         | 0.848 | 0.827 | 0.888 |
| average thickness                 | -0.06        | 0.328        | 0.743        | -0.168        | -        | 0.056         | 0.353 | 0.322 | 0.380 |

Significant results, corrected for multiple comparisons (FDR P-value  $\leq 0.05$ ), are color-coded red; trend significant results (nominal P-value  $< 0.05$ ) are color-coded orange.

A negative Effect size indicates a smaller surface area of region x in patient group y versus healthy controls; a positive Effect size indicates a larger surface area of region x in patient group y versus healthy controls.

Leave-site-out crossvalidation shows the resulting p-value distribution after a crossvalidation loop has been run over all sites, consisting of the mean, min and max p-values obtained.

**Supplementary Table S9:** mega-analytic results for cortical cortical thickness of each structure comparing adolescent ADHD, ASD and OCD patients to healthy control subjects, controlling for age, sex and scan site.

| ROI                              | OCD vs HC    |              |              |               |   | Leave-site out crossvalidation |       |       | ADHD vs HC  |              |              |              |               | Leave-site out crossvalidation |               |       |       |       |
|----------------------------------|--------------|--------------|--------------|---------------|---|--------------------------------|-------|-------|-------------|--------------|--------------|--------------|---------------|--------------------------------|---------------|-------|-------|-------|
|                                  | Effect size  | P-value      | FDR P-value  | 95% CI        |   | p-mean                         | p-min | p-max | Effect size | P-value      | FDR P-value  | 95% CI       |               | p-mean                         | p-min         | p-max |       |       |
| banks superior temporal sulcus   | -0.06        | 0.389        | 0.469        | -0.196        | - | 0.076                          | 0.382 | 0.235 | 0.880       | 0.06         | 0.224        | 0.738        | -0.039        | -                              | 0.166         | 0.220 | 0.072 | 0.455 |
| caudal anterior cingulate cortex | 0.06         | 0.333        | 0.469        | -0.066        | - | 0.196                          | 0.353 | 0.151 | 0.701       | 0.02         | 0.723        | 0.910        | -0.082        | -                              | 0.118         | 0.734 | 0.401 | 0.979 |
| caudal middle frontal gyrus      | -0.10        | 0.294        | 0.469        | -0.294        | - | 0.089                          | 0.095 | 0.025 | 0.609       | -0.06        | 0.251        | 0.738        | -0.157        | -                              | 0.041         | 0.239 | 0.110 | 0.388 |
| cuneus cortex                    | -0.09        | 0.179        | 0.392        | -0.223        | - | 0.042                          | 0.186 | 0.078 | 0.757       | 0.02         | 0.674        | 0.910        | -0.080        | -                              | 0.124         | 0.678 | 0.416 | 0.926 |
| entorhinal cortex                | -0.07        | 0.347        | 0.469        | -0.201        | - | 0.070                          | 0.358 | 0.207 | 0.985       | -0.07        | 0.164        | 0.738        | -0.168        | -                              | 0.028         | 0.174 | 0.055 | 0.575 |
| fusiform gyrus                   | -0.09        | 0.134        | 0.361        | -0.213        | - | 0.028                          | 0.139 | 0.062 | 0.348       | <b>-0.10</b> | <b>0.029</b> | <b>0.338</b> | <b>-0.196</b> | -                              | <b>-0.011</b> | 0.032 | 0.016 | 0.197 |
| inferior parietal cortex         | -0.14        | 0.163        | 0.380        | -0.341        | - | 0.058                          | 0.006 | 0.000 | 0.257       | 0.04         | 0.406        | 0.840        | -0.054        | -                              | 0.135         | 0.414 | 0.152 | 0.628 |
| inferior temporal gyrus          | <b>-0.14</b> | <b>0.027</b> | <b>0.236</b> | <b>-0.262</b> | - | <b>-0.016</b>                  | 0.030 | 0.015 | 0.163       | 0.00         | 0.987        | 0.987        | -0.094        | -                              | 0.096         | 0.969 | 0.221 | 1.000 |
| isthmus cingulate cortex         | -0.07        | 0.269        | 0.469        | -0.204        | - | 0.057                          | 0.269 | 0.128 | 0.498       | 0.01         | 0.798        | 0.910        | -0.087        | -                              | 0.114         | 0.791 | 0.425 | 0.983 |
| lateral occipital cortex         | <b>-0.17</b> | <b>0.007</b> | <b>0.158</b> | <b>-0.286</b> | - | <b>-0.045</b>                  | 0.010 | 0.002 | 0.171       | 0.05         | 0.341        | 0.796        | -0.048        | -                              | 0.138         | 0.349 | 0.147 | 0.622 |
| lateral orbitofrontal cortex     | -0.04        | 0.538        | 0.628        | -0.167        | - | 0.087                          | 0.549 | 0.328 | 0.818       | -0.07        | 0.150        | 0.738        | -0.171        | -                              | 0.026         | 0.152 | 0.086 | 0.277 |
| lingual gyrus                    | -0.07        | 0.264        | 0.469        | -0.197        | - | 0.054                          | 0.270 | 0.133 | 0.524       | -0.06        | 0.255        | 0.738        | -0.153        | -                              | 0.041         | 0.261 | 0.052 | 0.480 |
| medial orbitofrontal cortex      | -0.01        | 0.831        | 0.856        | -0.147        | - | 0.118                          | 0.825 | 0.504 | 0.997       | 0.06         | 0.215        | 0.738        | -0.037        | -                              | 0.166         | 0.220 | 0.126 | 0.327 |
| middle temporal gyrus            | -0.10        | 0.146        | 0.365        | -0.225        | - | 0.033                          | 0.154 | 0.049 | 0.616       | -0.03        | 0.616        | 0.910        | -0.124        | -                              | 0.073         | 0.616 | 0.400 | 0.959 |
| parahippocampal gyrus            | -0.03        | 0.695        | 0.760        | -0.165        | - | 0.110                          | 0.689 | 0.330 | 0.961       | <b>-0.12</b> | <b>0.023</b> | <b>0.338</b> | <b>-0.229</b> | -                              | <b>-0.017</b> | 0.024 | 0.012 | 0.053 |
| paracentral lobule               | -0.08        | 0.376        | 0.469        | -0.257        | - | 0.097                          | 0.203 | 0.031 | 0.666       | -0.06        | 0.247        | 0.738        | -0.156        | -                              | 0.040         | 0.255 | 0.144 | 0.708 |
| pars opercularis                 | -0.13        | 0.063        | 0.276        | -0.260        | - | 0.007                          | 0.067 | 0.025 | 0.215       | -0.02        | 0.643        | 0.910        | -0.126        | -                              | 0.078         | 0.648 | 0.514 | 0.970 |
| pars orbitalis                   | -0.11        | 0.125        | 0.361        | -0.244        | - | 0.030                          | 0.135 | 0.054 | 0.355       | 0.00         | 0.974        | 0.987        | -0.104        | -                              | 0.107         | 0.968 | 0.777 | 0.999 |
| pars triangularis                | -0.10        | 0.116        | 0.361        | -0.231        | - | 0.025                          | 0.122 | 0.059 | 0.281       | 0.02         | 0.704        | 0.910        | -0.080        | -                              | 0.118         | 0.710 | 0.542 | 0.858 |
| pericalcarine cortex             | -0.08        | 0.212        | 0.436        | -0.214        | - | 0.047                          | 0.221 | 0.088 | 0.623       | -0.07        | 0.146        | 0.738        | -0.176        | -                              | 0.026         | 0.156 | 0.097 | 0.353 |
| postcentral gyrus                | <b>-0.14</b> | <b>0.045</b> | <b>0.276</b> | <b>-0.267</b> | - | <b>-0.003</b>                  | 0.049 | 0.030 | 0.151       | -0.03        | 0.557        | 0.910        | -0.131        | -                              | 0.070         | 0.557 | 0.328 | 0.814 |
| posterior cingulate cortex       | <b>-0.16</b> | <b>0.018</b> | <b>0.210</b> | <b>-0.286</b> | - | <b>-0.027</b>                  | 0.020 | 0.005 | 0.177       | 0.04         | 0.421        | 0.840        | -0.059        | -                              | 0.141         | 0.428 | 0.247 | 0.775 |
| precentral gyrus                 | -0.13        | 0.061        | 0.276        | -0.259        | - | 0.006                          | 0.066 | 0.028 | 0.216       | -0.10        | 0.057        | 0.499        | -0.200        | -                              | 0.003         | 0.061 | 0.032 | 0.301 |

|                                   |              |              |              |               |   |               |       |       |       |              |              |              |               |   |               |       |       |       |
|-----------------------------------|--------------|--------------|--------------|---------------|---|---------------|-------|-------|-------|--------------|--------------|--------------|---------------|---|---------------|-------|-------|-------|
| precuneus cortex                  | -0.08        | 0.389        | 0.469        | -0.264        | - | 0.103         | 0.090 | 0.019 | 0.709 | -0.02        | 0.712        | 0.910        | -0.115        | - | 0.078         | 0.715 | 0.345 | 0.999 |
| rostral anterior cingulate cortex | 0.01         | 0.832        | 0.856        | -0.115        | - | 0.143         | 0.834 | 0.559 | 0.997 | 0.01         | 0.780        | 0.910        | -0.084        | - | 0.112         | 0.785 | 0.343 | 0.956 |
| rostral middle frontal gyrus      | -0.11        | 0.090        | 0.315        | -0.235        | - | 0.017         | 0.098 | 0.043 | 0.205 | 0.01         | 0.904        | 0.982        | -0.091        | - | 0.103         | 0.914 | 0.706 | 0.980 |
| superior frontal gyrus            | -0.12        | 0.079        | 0.307        | -0.249        | - | 0.013         | 0.085 | 0.037 | 0.265 | 0.06         | 0.278        | 0.738        | -0.044        | - | 0.155         | 0.300 | 0.139 | 0.438 |
| superior parietal cortex          | -0.17        | 0.057        | 0.276        | -0.344        | - | 0.005         | 0.003 | 0.000 | 0.114 | 0.00         | 0.926        | 0.982        | -0.091        | - | 0.100         | 0.918 | 0.472 | 1.000 |
| superior temporal gyrus           | -0.07        | 0.267        | 0.469        | -0.207        | - | 0.057         | 0.267 | 0.174 | 0.615 | 0.02         | 0.667        | 0.910        | -0.079        | - | 0.123         | 0.661 | 0.276 | 0.796 |
| supramarginal gyrus               | -0.09        | 0.309        | 0.469        | -0.269        | - | 0.085         | 0.109 | 0.033 | 0.560 | 0.01         | 0.792        | 0.910        | -0.084        | - | 0.110         | 0.801 | 0.496 | 0.988 |
| frontal pole                      | -0.06        | 0.386        | 0.469        | -0.197        | - | 0.076         | 0.394 | 0.167 | 0.847 | -0.04        | 0.432        | 0.840        | -0.148        | - | 0.063         | 0.436 | 0.170 | 0.693 |
| temporal pole                     | -0.03        | 0.613        | 0.692        | -0.168        | - | 0.099         | 0.623 | 0.458 | 0.851 | <b>-0.14</b> | <b>0.007</b> | <b>0.245</b> | <b>-0.246</b> | - | <b>-0.040</b> | 0.008 | 0.003 | 0.077 |
| transverse temporal cortex        | -0.07        | 0.302        | 0.469        | -0.195        | - | 0.061         | 0.307 | 0.095 | 0.747 | -0.01        | 0.792        | 0.910        | -0.113        | - | 0.086         | 0.783 | 0.526 | 0.979 |
| insula                            | -0.01        | 0.927        | 0.927        | -0.129        | - | 0.117         | 0.909 | 0.503 | 0.959 | -0.05        | 0.295        | 0.738        | -0.142        | - | 0.043         | 0.298 | 0.199 | 0.749 |
| average thickness                 | <b>-0.17</b> | <b>0.009</b> | <b>0.158</b> | <b>-0.290</b> | - | <b>-0.042</b> | 0.011 | 0.003 | 0.131 | -0.01        | 0.806        | 0.910        | -0.108        | - | 0.084         | 0.801 | 0.653 | 0.998 |

| ROI                              | ASD vs HC    |              |              |               |   | Leave-site out crossvalidation |       |       |       |
|----------------------------------|--------------|--------------|--------------|---------------|---|--------------------------------|-------|-------|-------|
|                                  | Effect size  | P-value      | FDR P-value  | 95% CI        |   | p-mean                         | p-min | p-max |       |
| banks superior temporal sulcus   | -0.13        | 0.161        | 0.365        | -0.308        | - | 0.051                          | 0.135 | 0.126 | 0.141 |
| caudal anterior cingulate cortex | -0.09        | 0.285        | 0.453        | -0.249        | - | 0.073                          | 0.177 | 0.154 | 0.213 |
| caudal middle frontal gyrus      | -0.12        | 0.203        | 0.365        | -0.303        | - | 0.064                          | 0.160 | 0.118 | 0.188 |
| cuneus cortex                    | -0.06        | 0.551        | 0.622        | -0.245        | - | 0.131                          | 0.573 | 0.543 | 0.610 |
| entorhinal cortex                | <b>-0.18</b> | <b>0.020</b> | <b>0.365</b> | <b>-0.327</b> | - | <b>-0.028</b>                  | 0.037 | 0.030 | 0.042 |
| fusiform gyrus                   | -0.14        | 0.086        | 0.365        | -0.304        | - | 0.020                          | 0.101 | 0.093 | 0.106 |
| inferior parietal cortex         | -0.03        | 0.736        | 0.736        | -0.219        | - | 0.154                          | 0.723 | 0.684 | 0.779 |
| inferior temporal gyrus          | -0.08        | 0.345        | 0.464        | -0.243        | - | 0.085                          | 0.332 | 0.309 | 0.349 |
| isthmus cingulate cortex         | -0.04        | 0.678        | 0.719        | -0.230        | - | 0.150                          | 0.559 | 0.525 | 0.606 |
| lateral occipital cortex         | -0.05        | 0.585        | 0.640        | -0.242        | - | 0.137                          | 0.585 | 0.554 | 0.623 |
| lateral orbitofrontal cortex     | -0.12        | 0.164        | 0.365        | -0.292        | - | 0.050                          | 0.223 | 0.203 | 0.249 |
| lingual gyrus                    | -0.07        | 0.492        | 0.574        | -0.286        | - | 0.137                          | 0.484 | 0.469 | 0.506 |

|                                   |              |              |              |               |          |               |       |       |       |
|-----------------------------------|--------------|--------------|--------------|---------------|----------|---------------|-------|-------|-------|
| medial orbitofrontal cortex       | -0.04        | 0.699        | 0.720        | -0.214        | -        | 0.144         | 0.748 | 0.700 | 0.818 |
| middle temporal gyrus             | -0.11        | 0.153        | 0.365        | -0.268        | -        | 0.042         | 0.179 | 0.169 | 0.190 |
| parahippocampal gyrus             | <b>-0.11</b> | <b>0.048</b> | <b>0.365</b> | <b>-0.220</b> | <b>-</b> | <b>-0.001</b> | 0.045 | 0.036 | 0.053 |
| paracentral lobule                | -0.15        | 0.059        | 0.365        | -0.306        | -        | 0.005         | 0.062 | 0.056 | 0.069 |
| pars opercularis                  | -0.15        | 0.059        | 0.365        | -0.311        | -        | 0.006         | 0.068 | 0.064 | 0.076 |
| pars orbitalis                    | -0.08        | 0.365        | 0.464        | -0.240        | -        | 0.088         | 0.380 | 0.354 | 0.401 |
| pars triangularis                 | -0.11        | 0.219        | 0.365        | -0.296        | -        | 0.068         | 0.234 | 0.221 | 0.255 |
| pericalcarine cortex              | -0.08        | 0.340        | 0.464        | -0.251        | -        | 0.086         | 0.529 | 0.487 | 0.579 |
| postcentral gyrus                 | -0.09        | 0.219        | 0.365        | -0.245        | -        | 0.056         | 0.257 | 0.233 | 0.277 |
| posterior cingulate cortex        | -0.12        | 0.200        | 0.365        | -0.292        | -        | 0.061         | 0.111 | 0.099 | 0.128 |
| precentral gyrus                  | -0.13        | 0.108        | 0.365        | -0.281        | -        | 0.028         | 0.117 | 0.109 | 0.125 |
| precuneus cortex                  | -0.10        | 0.216        | 0.365        | -0.263        | -        | 0.059         | 0.229 | 0.214 | 0.253 |
| rostral anterior cingulate cortex | -0.10        | 0.148        | 0.365        | -0.237        | -        | 0.036         | 0.132 | 0.114 | 0.153 |
| rostral middle frontal gyrus      | -0.10        | 0.358        | 0.464        | -0.313        | -        | 0.113         | 0.385 | 0.352 | 0.421 |
| superior frontal gyrus            | -0.14        | 0.150        | 0.365        | -0.322        | -        | 0.049         | 0.094 | 0.076 | 0.113 |
| superior parietal cortex          | -0.06        | 0.472        | 0.570        | -0.225        | -        | 0.104         | 0.505 | 0.455 | 0.582 |
| superior temporal gyrus           | -0.11        | 0.211        | 0.365        | -0.271        | -        | 0.060         | 0.176 | 0.172 | 0.180 |
| supramarginal gyrus               | -0.14        | 0.126        | 0.365        | -0.319        | -        | 0.040         | 0.146 | 0.131 | 0.159 |
| frontal pole                      | -0.14        | 0.139        | 0.365        | -0.317        | -        | 0.044         | 0.149 | 0.135 | 0.164 |
| temporal pole                     | -0.07        | 0.353        | 0.464        | -0.225        | -        | 0.080         | 0.377 | 0.331 | 0.406 |
| transverse temporal cortex        | -0.10        | 0.371        | 0.464        | -0.305        | -        | 0.114         | 0.311 | 0.301 | 0.321 |
| insula                            | -0.11        | 0.147        | 0.365        | -0.259        | -        | 0.039         | 0.120 | 0.107 | 0.137 |
| average thickness                 | -0.14        | 0.136        | 0.365        | -0.334        | -        | 0.046         | 0.152 | 0.142 | 0.161 |

Trend significant results (nominal P-value < 0.05) are color-coded orange.

A negative Effect size indicates a thinner cortex of region x in patient group y versus healthy controls; a positive Effect size indicates a thicker cortex of region x in patient group y versus healthy controls.

Leave-site-out crossvalidation shows the resulting p-value distribution after a crossvalidation loop has been run over all sites, consisting of the mean, min and max p-values obtained.

**Supplementary Table S10:** mega-analytic results for each subcortical structure comparing adult ADHD, ASD and OCD patients to healthy control subjects, controlling for age, sex, ICV, and scan site.

| ROI         | OCD vs HC    |              |              |               |   | Leave-site out crossvalidation |       |       | ADHD vs HC  |              |              |              |               | Leave-site out crossvalidation |               |       |       |       |
|-------------|--------------|--------------|--------------|---------------|---|--------------------------------|-------|-------|-------------|--------------|--------------|--------------|---------------|--------------------------------|---------------|-------|-------|-------|
|             | Effect size  | P-value      | FDR P-value  | 95% CI        |   | p-mean                         | p-min | p-max | Effect size | P-value      | FDR P-value  | 95% CI       |               | p-mean                         | p-min         | p-max |       |       |
| thalamus    | -0.05        | 0.053        | 0.106        | -0.109        | - | 0.001                          | 0.013 | 0.001 | 0.067       | -0.05        | 0.053        | 0.106        | -0.109        | -                              | 0.001         | 0.855 | 0.340 | 0.983 |
| caudate     | 0.01         | 0.806        | 0.902        | -0.045        | - | 0.057                          | 0.798 | 0.582 | 0.997       | 0.01         | 0.806        | 0.902        | -0.045        | -                              | 0.057         | 0.731 | 0.370 | 0.994 |
| putamen     | 0.00         | 0.902        | 0.902        | -0.043        | - | 0.049                          | 0.884 | 0.543 | 0.994       | 0.00         | 0.902        | 0.902        | -0.043        | -                              | 0.049         | 0.823 | 0.227 | 0.983 |
| pallidum    | <b>0.09</b>  | <b>0.007</b> | <b>0.028</b> | <b>0.025</b>  | - | <b>0.154</b>                   | 0.000 | 0.000 | 0.005       | <b>0.09</b>  | <b>0.007</b> | <b>0.028</b> | <b>0.025</b>  | -                              | <b>0.154</b>  | 0.265 | 0.146 | 0.481 |
| hippocampus | <b>-0.09</b> | <b>0.001</b> | <b>0.008</b> | <b>-0.135</b> | - | <b>-0.037</b>                  | 0.001 | 0.000 | 0.007       | <b>-0.09</b> | <b>0.001</b> | <b>0.008</b> | <b>-0.135</b> | -                              | <b>-0.037</b> | 0.864 | 0.477 | 0.981 |
| amygdala    | <b>-0.06</b> | <b>0.022</b> | <b>0.059</b> | <b>-0.106</b> | - | <b>-0.008</b>                  | 0.024 | 0.008 | 0.056       | <b>-0.06</b> | <b>0.022</b> | <b>0.059</b> | <b>-0.106</b> | -                              | <b>-0.008</b> | 0.638 | 0.299 | 0.888 |
| accumbens   | -0.03        | 0.254        | 0.406        | -0.073        | - | 0.019                          | 0.261 | 0.142 | 0.663       | -0.03        | 0.254        | 0.406        | -0.073        | -                              | 0.019         | 0.197 | 0.068 | 0.470 |
| ICV         | -0.01        | 0.594        | 0.792        | -0.061        | - | 0.035                          | 0.598 | 0.293 | 0.965       | -0.01        | 0.594        | 0.792        | -0.061        | -                              | 0.035         | 0.673 | 0.394 | 0.948 |
| ROI         | ASD vs HC    |              |              |               |   | Leave-site out crossvalidation |       |       |             |              |              |              |               |                                |               |       |       |       |
|             | Effect size  | P-value      | FDR P-value  | 95% CI        |   | p-mean                         | p-min | p-max |             |              |              |              |               |                                |               |       |       |       |
| thalamus    | 0.05         | 0.367        | 0.603        | -0.061        | - | 0.166                          | 0.500 | 0.385 | 0.548       |              |              |              |               |                                |               |       |       |       |
| caudate     | 0.01         | 0.914        | 0.914        | -0.089        | - | 0.099                          | 0.741 | 0.642 | 0.810       |              |              |              |               |                                |               |       |       |       |
| putamen     | -0.10        | 0.293        | 0.603        | -0.275        | - | 0.083                          | 0.738 | 0.687 | 0.879       |              |              |              |               |                                |               |       |       |       |
| pallidum    | 0.03         | 0.666        | 0.888        | -0.124        | - | 0.194                          | 0.680 | 0.532 | 0.702       |              |              |              |               |                                |               |       |       |       |
| hippocampus | <b>-0.11</b> | <b>0.023</b> | <b>0.184</b> | <b>-0.197</b> | - | <b>-0.014</b>                  | 0.119 | 0.059 | 0.212       |              |              |              |               |                                |               |       |       |       |
| amygdala    | -0.08        | 0.274        | 0.603        | -0.222        | - | 0.063                          | 0.329 | 0.311 | 0.483       |              |              |              |               |                                |               |       |       |       |
| accumbens   | -0.07        | 0.377        | 0.603        | -0.241        | - | 0.091                          | 0.621 | 0.480 | 0.730       |              |              |              |               |                                |               |       |       |       |
| ICV         | -0.01        | 0.910        | 0.914        | -0.147        | - | 0.131                          | 0.939 | 0.815 | 0.978       |              |              |              |               |                                |               |       |       |       |

Significant results, corrected for multiple comparisons (FDR P-value  $\leq 0.05$ ), are color-coded red; trend significant results (nominal P-value  $< 0.05$ ) are color-coded orange.

A negative Effect size indicates a smaller volume of region x in patient group y versus healthy controls; a positive Effect size indicates a larger volume of region x in patient group y versus healthy controls.

Leave-site-out crossvalidation shows the resulting p-value distribution after a crossvalidation loop has been run over all sites, consisting of the mean, min and max p-values obtained.

**Supplementary Table S11:** mega-analytic results for cortical thickness of each structure comparing adult ADHD, ASD and OCD patients to healthy control subjects, controlling for age, sex and scan site.

| ROI                              | OCD vs HC    |              |              |               |   | Leave-site out crossvalidation |       |       | ADHD vs HC  |              |              |              |               | Leave-site out crossvalidation |              |       |       |       |
|----------------------------------|--------------|--------------|--------------|---------------|---|--------------------------------|-------|-------|-------------|--------------|--------------|--------------|---------------|--------------------------------|--------------|-------|-------|-------|
|                                  | Effect size  | P-value      | FDR P-value  | 95% CI        |   | p-mean                         | p-min | p-max | Effect size | P-value      | FDR P-value  | 95% CI       |               | p-mean                         | p-min        | p-max |       |       |
| banks superior temporal sulcus   | -0.05        | 0.204        | 0.397        | -0.129        | - | 0.028                          | 0.167 | 0.046 | 0.438       | 0.04         | 0.303        | 0.758        | -0.037        | -                              | 0.121        | 0.308 | 0.179 | 0.592 |
| caudal anterior cingulate cortex | 0.01         | 0.763        | 0.861        | -0.046        | - | 0.063                          | 0.764 | 0.433 | 0.923       | <b>-0.08</b> | <b>0.049</b> | <b>0.574</b> | <b>-0.161</b> | -                              | <b>0.000</b> | 0.053 | 0.028 | 0.230 |
| caudal middle frontal gyrus      | -0.08        | 0.099        | 0.289        | -0.171        | - | 0.015                          | 0.014 | 0.000 | 0.105       | -0.03        | 0.487        | 0.821        | -0.100        | -                              | 0.048        | 0.496 | 0.293 | 0.927 |
| cuneus cortex                    | 0.01         | 0.845        | 0.924        | -0.063        | - | 0.077                          | 0.719 | 0.177 | 0.913       | 0.05         | 0.222        | 0.758        | -0.030        | -                              | 0.129        | 0.218 | 0.130 | 0.313 |
| entorhinal cortex                | -0.02        | 0.585        | 0.758        | -0.077        | - | 0.043                          | 0.582 | 0.289 | 0.881       | -0.08        | 0.082        | 0.574        | -0.165        | -                              | 0.010        | 0.087 | 0.021 | 0.309 |
| fusiform gyrus                   | -0.08        | 0.058        | 0.226        | -0.161        | - | 0.003                          | 0.017 | 0.001 | 0.098       | -0.03        | 0.464        | 0.821        | -0.102        | -                              | 0.047        | 0.479 | 0.321 | 0.846 |
| inferior parietal cortex         | <b>-0.11</b> | <b>0.018</b> | <b>0.189</b> | <b>-0.205</b> | - | <b>-0.019</b>                  | 0.000 | 0.000 | 0.005       | 0.05         | 0.159        | 0.696        | -0.021        | -                              | 0.128        | 0.163 | 0.047 | 0.310 |
| inferior temporal gyrus          | <b>-0.10</b> | <b>0.014</b> | <b>0.189</b> | <b>-0.178</b> | - | <b>-0.020</b>                  | 0.006 | 0.002 | 0.030       | 0.00         | 0.921        | 0.921        | -0.077        | -                              | 0.085        | 0.899 | 0.663 | 0.996 |
| isthmus cingulate cortex         | -0.04        | 0.302        | 0.503        | -0.125        | - | 0.039                          | 0.079 | 0.023 | 0.344       | 0.03         | 0.519        | 0.821        | -0.056        | -                              | 0.111        | 0.525 | 0.273 | 0.941 |
| lateral occipital cortex         | -0.07        | 0.077        | 0.270        | -0.142        | - | 0.007                          | 0.022 | 0.007 | 0.136       | <b>0.10</b>  | <b>0.013</b> | <b>0.455</b> | <b>0.021</b>  | -                              | <b>0.178</b> | 0.013 | 0.004 | 0.052 |
| lateral orbitofrontal cortex     | -0.07        | 0.056        | 0.226        | -0.146        | - | 0.002                          | 0.044 | 0.002 | 0.219       | -0.02        | 0.671        | 0.905        | -0.090        | -                              | 0.058        | 0.688 | 0.401 | 0.942 |
| lingual gyrus                    | -0.02        | 0.538        | 0.724        | -0.092        | - | 0.048                          | 0.390 | 0.108 | 0.801       | 0.05         | 0.268        | 0.758        | -0.035        | -                              | 0.128        | 0.261 | 0.156 | 0.371 |
| medial orbitofrontal cortex      | <b>-0.10</b> | <b>0.000</b> | <b>0.000</b> | <b>-0.148</b> | - | <b>-0.043</b>                  | 0.000 | 0.000 | 0.004       | -0.05        | 0.227        | 0.758        | -0.126        | -                              | 0.030        | 0.233 | 0.138 | 0.468 |
| middle temporal gyrus            | <b>-0.10</b> | <b>0.027</b> | <b>0.189</b> | <b>-0.182</b> | - | <b>-0.011</b>                  | 0.006 | 0.000 | 0.049       | 0.01         | 0.803        | 0.921        | -0.069        | -                              | 0.089        | 0.794 | 0.482 | 0.995 |
| parahippocampal gyrus            | -0.03        | 0.277        | 0.503        | -0.088        | - | 0.025                          | 0.282 | 0.117 | 0.501       | 0.05         | 0.266        | 0.758        | -0.037        | -                              | 0.136        | 0.271 | 0.140 | 0.528 |
| paracentral lobule               | -0.01        | 0.711        | 0.858        | -0.085        | - | 0.058                          | 0.584 | 0.350 | 0.996       | -0.01        | 0.699        | 0.906        | -0.090        | -                              | 0.060        | 0.712 | 0.391 | 0.975 |
| pars opercularis                 | -0.06        | 0.140        | 0.335        | -0.149        | - | 0.021                          | 0.077 | 0.003 | 0.341       | -0.03        | 0.494        | 0.821        | -0.099        | -                              | 0.048        | 0.494 | 0.386 | 0.744 |
| pars orbitalis                   | -0.06        | 0.127        | 0.335        | -0.133        | - | 0.017                          | 0.147 | 0.014 | 0.395       | 0.00         | 0.913        | 0.921        | -0.087        | -                              | 0.078        | 0.906 | 0.596 | 1.000 |
| pars triangularis                | -0.06        | 0.153        | 0.335        | -0.143        | - | 0.022                          | 0.066 | 0.010 | 0.295       | -0.01        | 0.762        | 0.921        | -0.087        | -                              | 0.064        | 0.754 | 0.396 | 0.999 |
| pericalcarine cortex             | 0.02         | 0.390        | 0.593        | -0.027        | - | 0.070                          | 0.390 | 0.074 | 0.624       | 0.02         | 0.672        | 0.905        | -0.057        | -                              | 0.088        | 0.662 | 0.514 | 0.849 |
| postcentral gyrus                | 0.00         | 0.949        | 0.954        | -0.076        | - | 0.081                          | 0.735 | 0.441 | 0.969       | 0.03         | 0.377        | 0.821        | -0.041        | -                              | 0.109        | 0.386 | 0.072 | 0.652 |
| posterior cingulate cortex       | <b>-0.07</b> | <b>0.025</b> | <b>0.189</b> | <b>-0.139</b> | - | <b>-0.009</b>                  | 0.006 | 0.001 | 0.043       | -0.07        | 0.068        | 0.574        | -0.143        | -                              | 0.005        | 0.074 | 0.024 | 0.346 |
| precentral gyrus                 | -0.04        | 0.430        | 0.627        | -0.126        | - | 0.053                          | 0.322 | 0.056 | 0.963       | -0.03        | 0.338        | 0.789        | -0.105        | -                              | 0.036        | 0.352 | 0.137 | 0.573 |

|                                   |              |              |              |               |   |               |                                |       |       |       |       |       |        |   |       |       |       |       |
|-----------------------------------|--------------|--------------|--------------|---------------|---|---------------|--------------------------------|-------|-------|-------|-------|-------|--------|---|-------|-------|-------|-------|
| precuneus cortex                  | -0.10        | 0.051        | 0.226        | -0.198        | - | 0.000         | 0.001                          | 0.000 | 0.024 | 0.03  | 0.522 | 0.821 | -0.052 | - | 0.102 | 0.513 | 0.267 | 0.807 |
| rostral anterior cingulate cortex | 0.00         | 0.954        | 0.954        | -0.050        | - | 0.053         | 0.932                          | 0.509 | 0.999 | -0.06 | 0.101 | 0.589 | -0.140 | - | 0.012 | 0.104 | 0.040 | 0.435 |
| rostral middle frontal gyrus      | <b>-0.08</b> | <b>0.041</b> | <b>0.226</b> | <b>-0.152</b> | - | <b>-0.003</b> | 0.007                          | 0.001 | 0.047 | 0.01  | 0.851 | 0.921 | -0.067 | - | 0.081 | 0.840 | 0.360 | 0.954 |
| superior frontal gyrus            | -0.05        | 0.301        | 0.503        | -0.148        | - | 0.046         | 0.139                          | 0.014 | 0.488 | -0.02 | 0.563 | 0.821 | -0.098 | - | 0.053 | 0.580 | 0.284 | 0.951 |
| superior parietal cortex          | -0.04        | 0.349        | 0.555        | -0.127        | - | 0.045         | 0.084                          | 0.023 | 0.535 | 0.07  | 0.082 | 0.574 | -0.008 | - | 0.141 | 0.086 | 0.012 | 0.286 |
| superior temporal gyrus           | -0.02        | 0.524        | 0.724        | -0.073        | - | 0.037         | 0.531                          | 0.268 | 0.972 | 0.01  | 0.856 | 0.921 | -0.073 | - | 0.088 | 0.861 | 0.478 | 0.975 |
| supramarginal gyrus               | -0.08        | 0.144        | 0.335        | -0.183        | - | 0.027         | 0.009                          | 0.002 | 0.060 | 0.02  | 0.560 | 0.821 | -0.053 | - | 0.098 | 0.574 | 0.199 | 0.910 |
| frontal pole                      | 0.00         | 0.953        | 0.954        | -0.059        | - | 0.056         | 0.929                          | 0.432 | 0.994 | 0.05  | 0.282 | 0.758 | -0.038 | - | 0.132 | 0.268 | 0.095 | 0.722 |
| temporal pole                     | 0.01         | 0.762        | 0.861        | -0.049        | - | 0.066         | 0.773                          | 0.439 | 0.981 | -0.07 | 0.134 | 0.670 | -0.155 | - | 0.021 | 0.138 | 0.070 | 0.416 |
| transverse temporal cortex        | -0.01        | 0.666        | 0.833        | -0.067        | - | 0.043         | 0.674                          | 0.387 | 0.989 | 0.00  | 0.915 | 0.921 | -0.090 | - | 0.080 | 0.891 | 0.379 | 0.991 |
| insula                            | -0.05        | 0.198        | 0.397        | -0.124        | - | 0.026         | 0.289                          | 0.043 | 0.618 | -0.03 | 0.455 | 0.821 | -0.107 | - | 0.048 | 0.470 | 0.357 | 0.803 |
| average thickness                 | -0.08        | 0.087        | 0.277        | -0.171        | - | 0.012         | 0.007                          | 0.000 | 0.077 | 0.01  | 0.824 | 0.921 | -0.064 | - | 0.080 | 0.810 | 0.405 | 0.996 |
| ROI                               | ASD vs HC    |              |              |               |   |               | Leave-site out crossvalidation |       |       |       |       |       |        |   |       |       |       |       |
|                                   | Effect size  | P-value      | FDR P-value  | 95% CI        |   | p-mean        | p-min                          | p-max |       |       |       |       |        |   |       |       |       |       |
| banks superior temporal sulcus    | 0.01         | 0.857        | 0.876        | -0.087        | - | 0.105         | 0.864                          | 0.789 | 0.955 |       |       |       |        |   |       |       |       |       |
| caudal anterior cingulate cortex  | 0.08         | 0.296        | 0.609        | -0.067        | - | 0.221         | 0.314                          | 0.231 | 0.359 |       |       |       |        |   |       |       |       |       |
| caudal middle frontal gyrus       | 0.06         | 0.452        | 0.715        | -0.095        | - | 0.213         | 0.415                          | 0.348 | 0.517 |       |       |       |        |   |       |       |       |       |
| cuneus cortex                     | 0.15         | 0.172        | 0.411        | -0.064        | - | 0.357         | 0.035                          | 0.024 | 0.042 |       |       |       |        |   |       |       |       |       |
| entorhinal cortex                 | -0.12        | 0.282        | 0.609        | -0.341        | - | 0.099         | 0.207                          | 0.161 | 0.283 |       |       |       |        |   |       |       |       |       |
| fusiform gyrus                    | -0.12        | 0.176        | 0.411        | -0.288        | - | 0.053         | 0.218                          | 0.178 | 0.260 |       |       |       |        |   |       |       |       |       |
| inferior parietal cortex          | -0.01        | 0.850        | 0.876        | -0.144        | - | 0.119         | 0.985                          | 0.890 | 1.000 |       |       |       |        |   |       |       |       |       |
| inferior temporal gyrus           | -0.14        | 0.123        | 0.411        | -0.312        | - | 0.037         | 0.137                          | 0.119 | 0.166 |       |       |       |        |   |       |       |       |       |
| isthmus cingulate cortex          | 0.08         | 0.155        | 0.411        | -0.028        | - | 0.179         | 0.206                          | 0.169 | 0.264 |       |       |       |        |   |       |       |       |       |
| lateral occipital cortex          | -0.02        | 0.814        | 0.876        | -0.187        | - | 0.147         | 0.395                          | 0.334 | 0.495 |       |       |       |        |   |       |       |       |       |
| lateral orbitofrontal cortex      | 0.12         | 0.069        | 0.268        | -0.010        | - | 0.259         | 0.070                          | 0.037 | 0.091 |       |       |       |        |   |       |       |       |       |
| lingual gyrus                     | 0.07         | 0.470        | 0.715        | -0.121        | - | 0.263         | 0.061                          | 0.044 | 0.075 |       |       |       |        |   |       |       |       |       |

|                                   |             |              |              |              |   |              |       |       |       |
|-----------------------------------|-------------|--------------|--------------|--------------|---|--------------|-------|-------|-------|
| medial orbitofrontal cortex       | <b>0.21</b> | <b>0.003</b> | <b>0.035</b> | <b>0.071</b> | - | <b>0.341</b> | 0.011 | 0.009 | 0.018 |
| middle temporal gyrus             | -0.06       | 0.527        | 0.769        | -0.228       | - | 0.117        | 0.592 | 0.522 | 0.618 |
| parahippocampal gyrus             | -0.08       | 0.382        | 0.704        | -0.270       | - | 0.103        | 0.445 | 0.393 | 0.552 |
| paracentral lobule                | 0.06        | 0.458        | 0.715        | -0.097       | - | 0.215        | 0.274 | 0.212 | 0.345 |
| pars opercularis                  | <b>0.11</b> | <b>0.017</b> | <b>0.099</b> | <b>0.020</b> | - | <b>0.201</b> | 0.121 | 0.071 | 0.165 |
| pars orbitalis                    | <b>0.16</b> | <b>0.022</b> | <b>0.110</b> | <b>0.023</b> | - | <b>0.296</b> | 0.027 | 0.012 | 0.037 |
| pars triangularis                 | <b>0.24</b> | <b>0.000</b> | <b>0.000</b> | <b>0.150</b> | - | <b>0.337</b> | 0.001 | 0.001 | 0.002 |
| pericalcarine cortex              | 0.05        | 0.586        | 0.820        | -0.127       | - | 0.225        | 0.186 | 0.121 | 0.208 |
| postcentral gyrus                 | -0.01       | 0.854        | 0.876        | -0.160       | - | 0.133        | 0.987 | 0.883 | 1.000 |
| posterior cingulate cortex        | <b>0.17</b> | <b>0.011</b> | <b>0.077</b> | <b>0.040</b> | - | <b>0.299</b> | 0.017 | 0.011 | 0.023 |
| precentral gyrus                  | -0.05       | 0.446        | 0.715        | -0.187       | - | 0.082        | 0.561 | 0.416 | 0.701 |
| precuneus cortex                  | 0.01        | 0.842        | 0.876        | -0.085       | - | 0.105        | 0.532 | 0.416 | 0.577 |
| rostral anterior cingulate cortex | 0.10        | 0.172        | 0.411        | -0.043       | - | 0.240        | 0.287 | 0.178 | 0.383 |
| rostral middle frontal gyrus      | 0.16        | 0.055        | 0.241        | -0.004       | - | 0.331        | 0.040 | 0.033 | 0.060 |
| superior frontal gyrus            | <b>0.19</b> | <b>0.005</b> | <b>0.044</b> | <b>0.056</b> | - | <b>0.320</b> | 0.016 | 0.013 | 0.021 |
| superior parietal cortex          | 0.02        | 0.835        | 0.876        | -0.143       | - | 0.177        | 0.450 | 0.364 | 0.522 |
| superior temporal gyrus           | -0.03       | 0.787        | 0.876        | -0.239       | - | 0.181        | 0.976 | 0.901 | 0.999 |
| supramarginal gyrus               | 0.02        | 0.723        | 0.876        | -0.077       | - | 0.111        | 0.883 | 0.775 | 0.988 |
| frontal pole                      | <b>0.19</b> | <b>0.000</b> | <b>0.000</b> | <b>0.090</b> | - | <b>0.300</b> | 0.002 | 0.000 | 0.003 |
| temporal pole                     | -0.15       | 0.172        | 0.411        | -0.372       | - | 0.066        | 0.132 | 0.107 | 0.169 |
| transverse temporal cortex        | -0.02       | 0.819        | 0.876        | -0.200       | - | 0.158        | 0.908 | 0.809 | 0.981 |
| insula                            | -0.01       | 0.876        | 0.876        | -0.150       | - | 0.128        | 0.975 | 0.898 | 0.998 |
| average thickness                 | 0.04        | 0.325        | 0.632        | -0.044       | - | 0.134        | 0.300 | 0.232 | 0.383 |

Significant results, corrected for multiple comparisons (FDR P-value  $\leq 0.05$ ), are color-coded red; trend significant results (nominal P-value  $< 0.05$ ) are color-coded orange.

A negative Effect size indicates a thinner cortex of region x in patient group y versus healthy controls; a positive Effect size indicates a thicker cortex of region x in patient group y versus healthy controls.

Leave-site-out crossvalidation shows the resulting p-value distribution after a crossvalidation loop has been run over all sites, consisting of the mean, min and max p-values obtained.

**Supplementary Table S12:** mega-analytic results for surface area of each structure comparing adult ADHD, ASD and OCD patients to healthy control subjects, controlling for age, sex, ICV, and scan site.

| ROI                              | OCD vs HC   |         |             |        |   | Leave-site out crossvalidation |       |       | ADHD vs HC  |              |              |              |               | Leave-site out crossvalidation |               |       |       |       |
|----------------------------------|-------------|---------|-------------|--------|---|--------------------------------|-------|-------|-------------|--------------|--------------|--------------|---------------|--------------------------------|---------------|-------|-------|-------|
|                                  | Effect size | P-value | FDR P-value | 95% CI |   | p-mean                         | p-min | p-max | Effect size | P-value      | FDR P-value  | 95% CI       |               | p-mean                         | p-min         | p-max |       |       |
| banks superior temporal sulcus   | 0.01        | 0.698   | 0.865       | -0.046 | - | 0.069                          | 0.649 | 0.384 | 0.923       | 0.01         | 0.840        | 0.961        | -0.072        | -                              | 0.088         | 0.963 | 0.695 | 0.999 |
| caudal anterior cingulate cortex | -0.02       | 0.601   | 0.865       | -0.073 | - | 0.042                          | 0.606 | 0.271 | 0.817       | -0.05        | 0.216        | 0.814        | -0.135        | -                              | 0.030         | 0.220 | 0.112 | 0.474 |
| caudal middle frontal gyrus      | -0.01       | 0.735   | 0.865       | -0.083 | - | 0.058                          | 0.902 | 0.183 | 0.999       | -0.03        | 0.477        | 0.831        | -0.108        | -                              | 0.050         | 0.487 | 0.238 | 0.756 |
| cuneus cortex                    | -0.02       | 0.667   | 0.865       | -0.089 | - | 0.057                          | 0.940 | 0.170 | 0.999       | 0.01         | 0.776        | 0.961        | -0.070        | -                              | 0.094         | 0.784 | 0.544 | 0.983 |
| entorhinal cortex                | 0.00        | 0.925   | 0.925       | -0.068 | - | 0.061                          | 0.925 | 0.485 | 0.995       | 0.01         | 0.826        | 0.961        | -0.081        | -                              | 0.101         | 0.880 | 0.544 | 0.987 |
| fusiform gyrus                   | -0.01       | 0.642   | 0.865       | -0.077 | - | 0.048                          | 0.878 | 0.294 | 1.000       | -0.03        | 0.386        | 0.828        | -0.111        | -                              | 0.043         | 0.386 | 0.147 | 0.616 |
| inferior parietal cortex         | 0.02        | 0.393   | 0.865       | -0.030 | - | 0.075                          | 0.392 | 0.188 | 0.860       | -0.03        | 0.425        | 0.828        | -0.105        | -                              | 0.044         | 0.428 | 0.143 | 0.782 |
| inferior temporal gyrus          | 0.01        | 0.649   | 0.865       | -0.039 | - | 0.063                          | 0.639 | 0.385 | 0.880       | -0.02        | 0.575        | 0.839        | -0.099        | -                              | 0.055         | 0.577 | 0.411 | 0.813 |
| isthmus cingulate cortex         | -0.01       | 0.583   | 0.865       | -0.067 | - | 0.038                          | 0.598 | 0.157 | 0.874       | -0.02        | 0.680        | 0.904        | -0.093        | -                              | 0.061         | 0.691 | 0.341 | 0.894 |
| lateral occipital cortex         | -0.03       | 0.457   | 0.865       | -0.101 | - | 0.045                          | 0.807 | 0.126 | 0.959       | -0.01        | 0.853        | 0.961        | -0.082        | -                              | 0.068         | 0.869 | 0.637 | 0.991 |
| lateral orbitofrontal cortex     | 0.00        | 0.885   | 0.911       | -0.062 | - | 0.054                          | 0.705 | 0.340 | 0.858       | -0.02        | 0.546        | 0.831        | -0.093        | -                              | 0.049         | 0.553 | 0.206 | 0.970 |
| lingual gyrus                    | -0.03       | 0.487   | 0.865       | -0.096 | - | 0.046                          | 0.829 | 0.105 | 0.984       | 0.01         | 0.879        | 0.961        | -0.078        | -                              | 0.092         | 0.873 | 0.636 | 0.992 |
| medial orbitofrontal cortex      | 0.01        | 0.634   | 0.865       | -0.037 | - | 0.061                          | 0.613 | 0.387 | 0.818       | -0.03        | 0.426        | 0.828        | -0.102        | -                              | 0.043         | 0.428 | 0.259 | 0.751 |
| middle temporal gyrus            | 0.02        | 0.437   | 0.865       | -0.031 | - | 0.071                          | 0.428 | 0.217 | 0.681       | -0.01        | 0.697        | 0.904        | -0.090        | -                              | 0.060         | 0.697 | 0.482 | 0.996 |
| parahippocampal gyrus            | 0.04        | 0.155   | 0.865       | -0.015 | - | 0.097                          | 0.161 | 0.078 | 0.461       | <b>-0.09</b> | <b>0.046</b> | <b>0.537</b> | <b>-0.169</b> | -                              | <b>-0.002</b> | 0.047 | 0.016 | 0.145 |
| paracentral lobule               | 0.02        | 0.523   | 0.865       | -0.037 | - | 0.072                          | 0.500 | 0.309 | 0.970       | 0.03         | 0.524        | 0.831        | -0.054        | -                              | 0.105         | 0.505 | 0.348 | 0.705 |
| pars opercularis                 | -0.05       | 0.064   | 0.621       | -0.109 | - | 0.003                          | 0.065 | 0.006 | 0.130       | 0.00         | 0.994        | 0.997        | -0.081        | -                              | 0.080         | 0.960 | 0.617 | 0.999 |
| pars orbitalis                   | -0.01       | 0.689   | 0.865       | -0.063 | - | 0.041                          | 0.701 | 0.180 | 0.929       | -0.05        | 0.190        | 0.814        | -0.127        | -                              | 0.025         | 0.194 | 0.058 | 0.502 |
| pars triangularis                | -0.07       | 0.055   | 0.621       | -0.139 | - | 0.001                          | 0.035 | 0.002 | 0.116       | <b>-0.09</b> | <b>0.033</b> | <b>0.537</b> | <b>-0.167</b> | -                              | <b>-0.007</b> | 0.039 | 0.007 | 0.239 |
| pericalcarine cortex             | -0.01       | 0.832   | 0.904       | -0.078 | - | 0.063                          | 0.775 | 0.275 | 0.972       | -0.05        | 0.269        | 0.814        | -0.133        | -                              | 0.037         | 0.264 | 0.150 | 0.566 |
| postcentral gyrus                | -0.03       | 0.454   | 0.865       | -0.091 | - | 0.040                          | 0.675 | 0.095 | 0.988       | -0.04        | 0.342        | 0.814        | -0.112        | -                              | 0.039         | 0.353 | 0.171 | 0.556 |
| posterior cingulate cortex       | -0.04       | 0.264   | 0.865       | -0.120 | - | 0.033                          | 0.276 | 0.044 | 0.507       | -0.05        | 0.186        | 0.814        | -0.130        | -                              | 0.025         | 0.203 | 0.036 | 0.652 |
| precentral gyrus                 | -0.01       | 0.707   | 0.865       | -0.059 | - | 0.040                          | 0.708 | 0.265 | 0.977       | 0.00         | 0.997        | 0.997        | -0.072        | -                              | 0.072         | 0.978 | 0.836 | 1.000 |

|                                   |              |              |              |               |   |               |       |       |       |              |              |              |               |   |               |       |       |       |
|-----------------------------------|--------------|--------------|--------------|---------------|---|---------------|-------|-------|-------|--------------|--------------|--------------|---------------|---|---------------|-------|-------|-------|
| precuneus cortex                  | -0.01        | 0.652        | 0.865        | -0.061        | - | 0.038         | 0.669 | 0.167 | 0.909 | -0.04        | 0.240        | 0.814        | -0.117        | - | 0.029         | 0.249 | 0.149 | 0.506 |
| rostral anterior cingulate cortex | 0.01         | 0.852        | 0.904        | -0.049        | - | 0.059         | 0.832 | 0.374 | 1.000 | 0.00         | 0.951        | 0.997        | -0.081        | - | 0.076         | 0.930 | 0.513 | 0.999 |
| rostral middle frontal gyrus      | -0.01        | 0.847        | 0.904        | -0.066        | - | 0.054         | 0.608 | 0.360 | 0.880 | -0.05        | 0.138        | 0.814        | -0.124        | - | 0.017         | 0.138 | 0.063 | 0.257 |
| superior frontal gyrus            | -0.03        | 0.355        | 0.865        | -0.091        | - | 0.033         | 0.766 | 0.040 | 0.995 | -0.03        | 0.321        | 0.814        | -0.102        | - | 0.034         | 0.331 | 0.198 | 0.625 |
| superior parietal cortex          | -0.05        | 0.108        | 0.756        | -0.121        | - | 0.012         | 0.205 | 0.007 | 0.350 | -0.04        | 0.261        | 0.814        | -0.120        | - | 0.033         | 0.268 | 0.166 | 0.418 |
| superior temporal gyrus           | -0.05        | 0.071        | 0.621        | -0.101        | - | 0.004         | 0.073 | 0.003 | 0.227 | -0.02        | 0.523        | 0.831        | -0.100        | - | 0.051         | 0.525 | 0.356 | 0.772 |
| supramarginal gyrus               | -0.02        | 0.402        | 0.865        | -0.078        | - | 0.031         | 0.396 | 0.044 | 0.644 | 0.02         | 0.546        | 0.831        | -0.052        | - | 0.098         | 0.560 | 0.395 | 0.882 |
| frontal pole                      | -0.01        | 0.691        | 0.865        | -0.070        | - | 0.047         | 0.699 | 0.232 | 0.888 | -0.02        | 0.616        | 0.862        | -0.108        | - | 0.064         | 0.624 | 0.363 | 0.864 |
| temporal pole                     | 0.01         | 0.664        | 0.865        | -0.047        | - | 0.073         | 0.628 | 0.348 | 0.854 | -0.04        | 0.349        | 0.814        | -0.130        | - | 0.046         | 0.344 | 0.230 | 0.868 |
| transverse temporal cortex        | <b>-0.12</b> | <b>0.001</b> | <b>0.035</b> | <b>-0.187</b> | - | <b>-0.051</b> | 0.001 | 0.000 | 0.002 | -0.05        | 0.217        | 0.814        | -0.141        | - | 0.032         | 0.226 | 0.121 | 0.359 |
| insula                            | -0.01        | 0.741        | 0.865        | -0.056        | - | 0.040         | 0.751 | 0.159 | 0.958 | <b>-0.08</b> | <b>0.022</b> | <b>0.537</b> | <b>-0.153</b> | - | <b>-0.012</b> | 0.023 | 0.012 | 0.068 |
| average thickness                 | -0.03        | 0.370        | 0.865        | -0.082        | - | 0.030         | 0.845 | 0.032 | 0.970 | -0.03        | 0.286        | 0.814        | -0.096        | - | 0.028         | 0.296 | 0.158 | 0.473 |

| ROI                              | ASD vs HC   |         |             |                | Leave-site out crossvalidation |       |       |
|----------------------------------|-------------|---------|-------------|----------------|--------------------------------|-------|-------|
|                                  | Effect size | P-value | FDR P-value | 95% CI         | p-mean                         | p-min | p-max |
| banks superior temporal sulcus   | -0.09       | 0.161   | 0.691       | -0.215 - 0.036 | 0.380                          | 0.263 | 0.473 |
| caudal anterior cingulate cortex | -0.05       | 0.471   | 0.749       | -0.193 - 0.089 | 0.456                          | 0.390 | 0.550 |
| caudal middle frontal gyrus      | 0.03        | 0.615   | 0.791       | -0.073 - 0.124 | 0.826                          | 0.611 | 0.990 |
| cuneus cortex                    | -0.09       | 0.103   | 0.691       | -0.187 - 0.017 | 0.186                          | 0.102 | 0.324 |
| entorhinal cortex                | -0.07       | 0.207   | 0.691       | -0.178 - 0.039 | 0.286                          | 0.189 | 0.416 |
| fusiform gyrus                   | -0.05       | 0.252   | 0.691       | -0.146 - 0.038 | 0.324                          | 0.238 | 0.566 |
| inferior parietal cortex         | -0.04       | 0.444   | 0.749       | -0.129 - 0.057 | 0.645                          | 0.468 | 0.789 |
| inferior temporal gyrus          | -0.06       | 0.203   | 0.691       | -0.153 - 0.032 | 0.205                          | 0.146 | 0.310 |
| isthmus cingulate cortex         | 0.05        | 0.330   | 0.710       | -0.048 - 0.143 | 0.209                          | 0.153 | 0.323 |
| lateral occipital cortex         | 0.05        | 0.292   | 0.691       | -0.043 - 0.144 | 0.132                          | 0.100 | 0.202 |
| lateral orbitofrontal cortex     | -0.01       | 0.831   | 0.855       | -0.099 - 0.079 | 0.761                          | 0.555 | 0.894 |
| lingual gyrus                    | -0.05       | 0.345   | 0.710       | -0.153 - 0.053 | 0.450                          | 0.311 | 0.542 |

|                                          |       |       |       |        |   |       |       |       |       |
|------------------------------------------|-------|-------|-------|--------|---|-------|-------|-------|-------|
| <b>medial orbitofrontal cortex</b>       | 0.02  | 0.703 | 0.791 | -0.073 | - | 0.108 | 0.507 | 0.426 | 0.648 |
| <b>middle temporal gyrus</b>             | -0.10 | 0.140 | 0.691 | -0.228 | - | 0.032 | 0.219 | 0.157 | 0.290 |
| <b>parahippocampal gyrus</b>             | 0.03  | 0.551 | 0.791 | -0.070 | - | 0.132 | 0.674 | 0.463 | 0.905 |
| <b>paracentral lobule</b>                | 0.07  | 0.158 | 0.691 | -0.028 | - | 0.170 | 0.029 | 0.010 | 0.101 |
| <b>pars opercularis</b>                  | 0.04  | 0.444 | 0.749 | -0.061 | - | 0.140 | 0.657 | 0.562 | 0.854 |
| <b>pars orbitalis</b>                    | 0.03  | 0.604 | 0.791 | -0.070 | - | 0.120 | 0.513 | 0.296 | 0.605 |
| <b>pars triangularis</b>                 | 0.07  | 0.153 | 0.691 | -0.027 | - | 0.173 | 0.100 | 0.083 | 0.150 |
| <b>pericalcarine cortex</b>              | -0.02 | 0.676 | 0.791 | -0.128 | - | 0.083 | 0.703 | 0.554 | 0.817 |
| <b>postcentral gyrus</b>                 | 0.05  | 0.280 | 0.691 | -0.042 | - | 0.144 | 0.385 | 0.280 | 0.443 |
| <b>posterior cingulate cortex</b>        | -0.06 | 0.198 | 0.691 | -0.160 | - | 0.033 | 0.588 | 0.369 | 0.783 |
| <b>precentral gyrus</b>                  | 0.10  | 0.135 | 0.691 | -0.031 | - | 0.230 | 0.191 | 0.153 | 0.266 |
| <b>precuneus cortex</b>                  | -0.04 | 0.417 | 0.749 | -0.129 | - | 0.054 | 0.959 | 0.865 | 0.992 |
| <b>rostral anterior cingulate cortex</b> | -0.02 | 0.717 | 0.791 | -0.115 | - | 0.079 | 0.823 | 0.655 | 0.930 |
| <b>rostral middle frontal gyrus</b>      | 0.03  | 0.466 | 0.749 | -0.055 | - | 0.120 | 0.315 | 0.231 | 0.452 |
| <b>superior frontal gyrus</b>            | 0.00  | 0.909 | 0.909 | -0.080 | - | 0.090 | 0.703 | 0.501 | 0.884 |
| <b>superior parietal cortex</b>          | 0.03  | 0.606 | 0.791 | -0.070 | - | 0.120 | 0.738 | 0.590 | 0.870 |
| <b>superior temporal gyrus</b>           | 0.02  | 0.813 | 0.855 | -0.116 | - | 0.148 | 0.908 | 0.868 | 0.997 |
| <b>supramarginal gyrus</b>               | 0.02  | 0.677 | 0.791 | -0.073 | - | 0.113 | 0.938 | 0.878 | 0.950 |
| <b>frontal pole</b>                      | -0.02 | 0.675 | 0.791 | -0.130 | - | 0.084 | 0.937 | 0.470 | 0.975 |
| <b>temporal pole</b>                     | -0.06 | 0.289 | 0.691 | -0.164 | - | 0.049 | 0.389 | 0.267 | 0.717 |
| <b>transverse temporal cortex</b>        | 0.06  | 0.296 | 0.691 | -0.049 | - | 0.160 | 0.383 | 0.198 | 0.544 |
| <b>insula</b>                            | 0.07  | 0.265 | 0.691 | -0.057 | - | 0.206 | 0.300 | 0.174 | 0.373 |
| <b>average thickness</b>                 | 0.01  | 0.723 | 0.791 | -0.063 | - | 0.091 | 0.628 | 0.468 | 0.736 |

Significant results, corrected for multiple comparisons (FDR P-value  $\leq 0.05$ ), are color-coded red; trend significant results (nominal P-value  $< 0.05$ ) are color-coded orange.

A negative Effect size indicates a smaller surface area of region x in patient group y versus healthy controls; a positive Effect size indicates a larger surface area of region x in patient group y versus healthy controls.  
Leave-site-out crossvalidation shows the resulting p-value distribution after a crossvalidation loop has been run over all sites, consisting of the mean, min and max p-values obtained.

**Supplementary Table S13:** mega-analytic results for surface area of each structure comparing pediatric ADHD, ASD and OCD patients to healthy control subjects, controlling for age, sex, ICV, and scan site.

| ROI                              | OCD vs HC   |         |             |        |   | Leave-site out crossvalidation |       |       | ADHD vs HC  |              |              |              |               | Leave-site out crossvalidation |               |       |       |       |
|----------------------------------|-------------|---------|-------------|--------|---|--------------------------------|-------|-------|-------------|--------------|--------------|--------------|---------------|--------------------------------|---------------|-------|-------|-------|
|                                  | Effect size | P-value | FDR P-value | 95% CI |   | p-mean                         | p-min | p-max | Effect size | P-value      | FDR P-value  | 95% CI       |               | p-mean                         | p-min         | p-max |       |       |
| banks superior temporal sulcus   | 0.12        | 0.220   | 0.642       | -0.069 | - | 0.301                          | 0.062 | 0.019 | 0.338       | 0.00         | 0.944        | 0.944        | -0.090        | -                              | 0.084         | 0.147 | 0.100 | 0.229 |
| caudal anterior cingulate cortex | 0.07        | 0.474   | 0.867       | -0.114 | - | 0.246                          | 0.470 | 0.259 | 0.941       | -0.07        | 0.102        | 0.170        | -0.156        | -                              | 0.014         | 0.102 | 0.036 | 0.164 |
| caudal middle frontal gyrus      | -0.06       | 0.520   | 0.867       | -0.241 | - | 0.122                          | 0.538 | 0.228 | 0.890       | <b>-0.10</b> | <b>0.029</b> | <b>0.073</b> | <b>-0.183</b> | -                              | <b>-0.010</b> | 0.030 | 0.024 | 0.054 |
| cuneus cortex                    | -0.15       | 0.102   | 0.642       | -0.338 | - | 0.030                          | 0.108 | 0.047 | 0.268       | 0.02         | 0.728        | 0.772        | -0.073        | -                              | 0.104         | 0.731 | 0.582 | 0.987 |
| entorhinal cortex                | -0.05       | 0.653   | 0.914       | -0.254 | - | 0.159                          | 0.655 | 0.491 | 0.978       | <b>-0.10</b> | <b>0.038</b> | <b>0.083</b> | <b>-0.192</b> | -                              | <b>-0.005</b> | 0.039 | 0.019 | 0.070 |
| fusiform gyrus                   | -0.02       | 0.856   | 0.963       | -0.180 | - | 0.149                          | 0.851 | 0.596 | 0.972       | <b>-0.09</b> | <b>0.018</b> | <b>0.057</b> | <b>-0.169</b> | -                              | <b>-0.016</b> | 0.018 | 0.008 | 0.041 |
| inferior parietal cortex         | -0.08       | 0.342   | 0.798       | -0.248 | - | 0.086                          | 0.342 | 0.173 | 0.798       | <b>-0.08</b> | <b>0.044</b> | <b>0.091</b> | <b>-0.155</b> | -                              | <b>-0.002</b> | 0.045 | 0.021 | 0.080 |
| inferior temporal gyrus          | 0.12        | 0.404   | 0.867       | -0.164 | - | 0.407                          | 0.375 | 0.124 | 0.731       | <b>-0.14</b> | <b>0.003</b> | <b>0.026</b> | <b>-0.236</b> | -                              | <b>-0.049</b> | 0.144 | 0.114 | 0.233 |
| isthmus cingulate cortex         | -0.02       | 0.798   | 0.963       | -0.209 | - | 0.160                          | 0.786 | 0.437 | 0.953       | <b>-0.11</b> | <b>0.014</b> | <b>0.053</b> | <b>-0.197</b> | -                              | <b>-0.022</b> | 0.013 | 0.005 | 0.024 |
| lateral occipital cortex         | 0.00        | 0.954   | 0.982       | -0.174 | - | 0.164                          | 0.919 | 0.331 | 0.998       | -0.06        | 0.151        | 0.220        | -0.138        | -                              | 0.021         | 0.150 | 0.087 | 0.205 |
| lateral orbitofrontal cortex     | -0.10       | 0.199   | 0.642       | -0.258 | - | 0.054                          | 0.215 | 0.024 | 0.494       | <b>-0.14</b> | <b>0.000</b> | <b>0.000</b> | <b>-0.212</b> | -                              | <b>-0.065</b> | 0.000 | 0.000 | 0.001 |
| lingual gyrus                    | 0.07        | 0.462   | 0.867       | -0.114 | - | 0.250                          | 0.474 | 0.260 | 0.861       | -0.04        | 0.402        | 0.469        | -0.125        | -                              | 0.050         | 0.403 | 0.268 | 0.620 |
| medial orbitofrontal cortex      | -0.13       | 0.099   | 0.642       | -0.290 | - | 0.025                          | 0.110 | 0.054 | 0.342       | <b>-0.10</b> | <b>0.006</b> | <b>0.030</b> | <b>-0.179</b> | -                              | <b>-0.031</b> | 0.006 | 0.002 | 0.023 |
| middle temporal gyrus            | 0.00        | 0.999   | 0.999       | -0.157 | - | 0.157                          | 0.951 | 0.500 | 0.998       | -0.04        | 0.250        | 0.324        | -0.117        | -                              | 0.030         | 0.249 | 0.201 | 0.324 |
| parahippocampal gyrus            | 0.13        | 0.204   | 0.642       | -0.068 | - | 0.321                          | 0.215 | 0.105 | 0.381       | -0.05        | 0.315        | 0.380        | -0.138        | -                              | 0.045         | 0.315 | 0.187 | 0.516 |
| paracentral lobule               | -0.16       | 0.086   | 0.642       | -0.337 | - | 0.022                          | 0.092 | 0.006 | 0.199       | <b>-0.12</b> | <b>0.007</b> | <b>0.031</b> | <b>-0.207</b> | -                              | <b>-0.033</b> | 0.006 | 0.002 | 0.013 |
| pars opercularis                 | -0.17       | 0.075   | 0.642       | -0.349 | - | 0.017                          | 0.081 | 0.032 | 0.206       | -0.03        | 0.449        | 0.507        | -0.123        | -                              | 0.054         | 0.447 | 0.324 | 0.610 |
| pars orbitalis                   | -0.13       | 0.130   | 0.642       | -0.300 | - | 0.038                          | 0.147 | 0.038 | 0.356       | -0.08        | 0.058        | 0.107        | -0.159        | -                              | 0.003         | 0.060 | 0.028 | 0.095 |
| pars triangularis                | -0.05       | 0.603   | 0.891       | -0.234 | - | 0.136                          | 0.606 | 0.350 | 0.829       | -0.05        | 0.248        | 0.324        | -0.143        | -                              | 0.037         | 0.247 | 0.148 | 0.313 |
| pericalcarine cortex             | -0.12       | 0.220   | 0.642       | -0.314 | - | 0.072                          | 0.233 | 0.139 | 0.370       | 0.01         | 0.875        | 0.901        | -0.085        | -                              | 0.100         | 0.865 | 0.758 | 0.994 |
| postcentral gyrus                | -0.11       | 0.196   | 0.642       | -0.285 | - | 0.058                          | 0.201 | 0.130 | 0.342       | -0.06        | 0.124        | 0.197        | -0.144        | -                              | 0.017         | 0.124 | 0.083 | 0.212 |
| posterior cingulate cortex       | -0.01       | 0.925   | 0.981       | -0.186 | - | 0.169                          | 0.908 | 0.445 | 0.996       | <b>-0.13</b> | <b>0.002</b> | <b>0.023</b> | <b>-0.213</b> | -                              | <b>-0.046</b> | 0.002 | 0.001 | 0.004 |
| precentral gyrus                 | -0.11       | 0.201   | 0.642       | -0.267 | - | 0.056                          | 0.209 | 0.087 | 0.500       | -0.06        | 0.151        | 0.220        | -0.132        | -                              | 0.020         | 0.160 | 0.050 | 0.322 |

|                                   |              |              |              |               |   |               |                                |       |       |              |              |              |               |   |               |       |       |       |
|-----------------------------------|--------------|--------------|--------------|---------------|---|---------------|--------------------------------|-------|-------|--------------|--------------|--------------|---------------|---|---------------|-------|-------|-------|
| precuneus cortex                  | -0.05        | 0.519        | 0.867        | -0.219        | - | 0.110         | 0.530                          | 0.235 | 0.982 | -0.07        | 0.102        | 0.170        | -0.144        | - | 0.013         | 0.096 | 0.026 | 0.122 |
| rostral anterior cingulate cortex | 0.02         | 0.808        | 0.963        | -0.141        | - | 0.181         | 0.751                          | 0.319 | 0.976 | <b>-0.11</b> | <b>0.004</b> | <b>0.028</b> | <b>-0.187</b> | - | <b>-0.036</b> | 0.004 | 0.002 | 0.012 |
| rostral middle frontal gyrus      | -0.05        | 0.487        | 0.867        | -0.209        | - | 0.099         | 0.497                          | 0.200 | 0.880 | <b>-0.07</b> | <b>0.047</b> | <b>0.091</b> | <b>-0.147</b> | - | <b>-0.001</b> | 0.048 | 0.032 | 0.077 |
| superior frontal gyrus            | -0.12        | 0.112        | 0.642        | -0.266        | - | 0.028         | 0.123                          | 0.022 | 0.344 | <b>-0.10</b> | <b>0.006</b> | <b>0.030</b> | <b>-0.165</b> | - | <b>-0.028</b> | 0.006 | 0.003 | 0.016 |
| superior parietal cortex          | -0.09        | 0.334        | 0.798        | -0.260        | - | 0.088         | 0.346                          | 0.048 | 0.968 | -0.04        | 0.295        | 0.369        | -0.126        | - | 0.038         | 0.305 | 0.248 | 0.517 |
| superior temporal gyrus           | -0.01        | 0.880        | 0.963        | -0.173        | - | 0.148         | 0.878                          | 0.562 | 0.986 | <b>-0.08</b> | <b>0.036</b> | <b>0.083</b> | <b>-0.156</b> | - | <b>-0.005</b> | 0.036 | 0.019 | 0.049 |
| supramarginal gyrus               | -0.02        | 0.776        | 0.963        | -0.197        | - | 0.147         | 0.734                          | 0.536 | 0.866 | <b>-0.10</b> | <b>0.015</b> | <b>0.053</b> | <b>-0.178</b> | - | <b>-0.019</b> | 0.015 | 0.007 | 0.037 |
| frontal pole                      | 0.02         | 0.852        | 0.963        | -0.171        | - | 0.208         | 0.823                          | 0.365 | 0.996 | 0.02         | 0.701        | 0.767        | -0.074        | - | 0.110         | 0.684 | 0.394 | 0.980 |
| temporal pole                     | 0.04         | 0.711        | 0.957        | -0.156        | - | 0.229         | 0.709                          | 0.341 | 0.922 | <b>-0.11</b> | <b>0.023</b> | <b>0.062</b> | <b>-0.200</b> | - | <b>-0.015</b> | 0.025 | 0.013 | 0.069 |
| transverse temporal cortex        | -0.05        | 0.611        | 0.891        | -0.236        | - | 0.139         | 0.616                          | 0.381 | 0.985 | -0.06        | 0.206        | 0.288        | -0.151        | - | 0.032         | 0.207 | 0.097 | 0.300 |
| insula                            | -0.04        | 0.584        | 0.891        | -0.199        | - | 0.112         | 0.597                          | 0.230 | 0.961 | <b>-0.08</b> | <b>0.022</b> | <b>0.062</b> | <b>-0.156</b> | - | <b>-0.012</b> | 0.023 | 0.006 | 0.038 |
| average thickness                 | -0.06        | 0.330        | 0.798        | -0.187        | - | 0.063         | 0.340                          | 0.132 | 0.644 | <b>-0.09</b> | <b>0.002</b> | <b>0.023</b> | <b>-0.152</b> | - | <b>-0.034</b> | 0.002 | 0.001 | 0.004 |
| ROI                               | ASD vs HC    |              |              |               |   |               | Leave-site out crossvalidation |       |       |              |              |              |               |   |               |       |       |       |
|                                   | Effect size  | P-value      | FDR P-value  | 95% CI        |   | p-mean        | p-min                          | p-max |       |              |              |              |               |   |               |       |       |       |
| banks superior temporal sulcus    | <b>-0.13</b> | <b>0.003</b> | <b>0.053</b> | <b>-0.220</b> | - | <b>-0.045</b> | 0.147                          | 0.123 | 0.166 |              |              |              |               |   |               |       |       |       |
| caudal anterior cingulate cortex  | -0.03        | 0.474        | 0.691        | -0.119        | - | 0.055         | 0.480                          | 0.455 | 0.522 |              |              |              |               |   |               |       |       |       |
| caudal middle frontal gyrus       | <b>-0.14</b> | <b>0.003</b> | <b>0.053</b> | <b>-0.224</b> | - | <b>-0.046</b> | 0.003                          | 0.002 | 0.003 |              |              |              |               |   |               |       |       |       |
| cuneus cortex                     | -0.03        | 0.467        | 0.691        | -0.125        | - | 0.057         | 0.451                          | 0.420 | 0.485 |              |              |              |               |   |               |       |       |       |
| entorhinal cortex                 | 0.06         | 0.258        | 0.602        | -0.040        | - | 0.151         | 0.308                          | 0.257 | 0.338 |              |              |              |               |   |               |       |       |       |
| fusiform gyrus                    | -0.06        | 0.294        | 0.605        | -0.161        | - | 0.049         | 0.280                          | 0.261 | 0.305 |              |              |              |               |   |               |       |       |       |
| inferior parietal cortex          | -0.10        | 0.094        | 0.411        | -0.218        | - | 0.017         | 0.061                          | 0.054 | 0.072 |              |              |              |               |   |               |       |       |       |
| inferior temporal gyrus           | 0.01         | 0.910        | 0.950        | -0.157        | - | 0.176         | 0.362                          | 0.337 | 0.396 |              |              |              |               |   |               |       |       |       |
| isthmus cingulate cortex          | 0.07         | 0.110        | 0.428        | -0.017        | - | 0.163         | 0.554                          | 0.470 | 0.619 |              |              |              |               |   |               |       |       |       |
| lateral occipital cortex          | 0.03         | 0.537        | 0.723        | -0.056        | - | 0.107         | 0.731                          | 0.655 | 0.760 |              |              |              |               |   |               |       |       |       |
| lateral orbitofrontal cortex      | -0.08        | 0.182        | 0.528        | -0.185        | - | 0.035         | 0.174                          | 0.160 | 0.193 |              |              |              |               |   |               |       |       |       |
| lingual gyrus                     | -0.02        | 0.594        | 0.770        | -0.115        | - | 0.066         | 0.382                          | 0.340 | 0.475 |              |              |              |               |   |               |       |       |       |

|                                   |              |              |              |               |   |               |       |       |       |
|-----------------------------------|--------------|--------------|--------------|---------------|---|---------------|-------|-------|-------|
| medial orbitofrontal cortex       | -0.06        | 0.348        | 0.662        | -0.181        | - | 0.064         | 0.322 | 0.293 | 0.357 |
| middle temporal gyrus             | <b>-0.14</b> | <b>0.009</b> | <b>0.079</b> | <b>-0.244</b> | - | <b>-0.034</b> | 0.016 | 0.013 | 0.019 |
| parahippocampal gyrus             | -0.01        | 0.914        | 0.950        | -0.099        | - | 0.089         | 0.774 | 0.735 | 0.832 |
| paracentral lobule                | 0.06         | 0.201        | 0.528        | -0.031        | - | 0.147         | 0.408 | 0.357 | 0.449 |
| pars opercularis                  | <b>-0.09</b> | <b>0.045</b> | <b>0.263</b> | <b>-0.184</b> | - | <b>-0.002</b> | 0.060 | 0.054 | 0.065 |
| pars orbitalis                    | -0.06        | 0.154        | 0.490        | -0.144        | - | 0.023         | 0.279 | 0.255 | 0.306 |
| pars triangularis                 | <b>-0.13</b> | <b>0.007</b> | <b>0.079</b> | <b>-0.219</b> | - | <b>-0.035</b> | 0.015 | 0.014 | 0.018 |
| pericalcarine cortex              | -0.06        | 0.211        | 0.528        | -0.156        | - | 0.034         | 0.217 | 0.184 | 0.247 |
| postcentral gyrus                 | -0.01        | 0.923        | 0.950        | -0.124        | - | 0.113         | 0.939 | 0.924 | 0.981 |
| posterior cingulate cortex        | 0.01         | 0.813        | 0.949        | -0.075        | - | 0.096         | 0.953 | 0.901 | 0.997 |
| precentral gyrus                  | 0.02         | 0.656        | 0.792        | -0.060        | - | 0.096         | 0.621 | 0.567 | 0.650 |
| precuneus cortex                  | 0.03         | 0.525        | 0.723        | -0.054        | - | 0.107         | 0.878 | 0.813 | 0.932 |
| rostral anterior cingulate cortex | -0.07        | 0.065        | 0.325        | -0.149        | - | 0.005         | 0.342 | 0.311 | 0.378 |
| rostral middle frontal gyrus      | -0.04        | 0.438        | 0.691        | -0.143        | - | 0.062         | 0.430 | 0.401 | 0.482 |
| superior frontal gyrus            | -0.05        | 0.376        | 0.662        | -0.145        | - | 0.055         | 0.398 | 0.370 | 0.434 |
| superior parietal cortex          | 0.01         | 0.874        | 0.950        | -0.077        | - | 0.091         | 0.849 | 0.758 | 0.907 |
| superior temporal gyrus           | -0.08        | 0.149        | 0.490        | -0.185        | - | 0.028         | 0.170 | 0.157 | 0.188 |
| supramarginal gyrus               | 0.00         | 0.990        | 0.990        | -0.082        | - | 0.080         | 0.771 | 0.735 | 0.896 |
| frontal pole                      | <b>0.11</b>  | <b>0.027</b> | <b>0.189</b> | <b>0.012</b>  | - | <b>0.201</b>  | 0.068 | 0.063 | 0.075 |
| temporal pole                     | -0.02        | 0.623        | 0.779        | -0.119        | - | 0.071         | 0.569 | 0.544 | 0.605 |
| transverse temporal cortex        | 0.05         | 0.283        | 0.605        | -0.043        | - | 0.145         | 0.351 | 0.309 | 0.390 |
| insula                            | -0.03        | 0.428        | 0.691        | -0.103        | - | 0.044         | 0.521 | 0.494 | 0.543 |
| average thickness                 | -0.05        | 0.378        | 0.662        | -0.149        | - | 0.057         | 0.325 | 0.300 | 0.371 |

Significant results, corrected for multiple comparisons (FDR P-value  $\leq 0.05$ ), are color-coded red; trend significant results (nominal P-value  $< 0.05$ ) are color-coded orange.

A negative Effect size indicates a smaller surface area of region x in patient group y versus healthy controls; a positive Effect size indicates a larger surface area of region x in patient group y versus healthy controls.

Leave-site-out crossvalidation shows the resulting p-value distribution after a crossvalidation loop has been run over all sites, consisting of the mean, min and max p-values obtained.

**Supplementary Table S14:** mega-analytic results for each subcortical structure comparing pediatric ADHD, ASD and OCD patients, controlling for age, sex, ICV, and scan site.

| ROI         | ADHD vs OCD  |              |              |               |   |               | ASD vs OCD   |              |              |               |   |               | ASD vs ADHD |              |              |              |   |              |
|-------------|--------------|--------------|--------------|---------------|---|---------------|--------------|--------------|--------------|---------------|---|---------------|-------------|--------------|--------------|--------------|---|--------------|
|             | Effect size  | P-value      | FDR P-value  | 95% CI        |   |               | Effect size  | P-value      | FDR P-value  | 95% CI        |   |               | Effect size | P-value      | FDR P-value  | 95% CI       |   |              |
| thalamus    | -0,03        | 0,736        | 0,914        | -0,187        | - | 0,132         | -0,09        | 0,312        | 0,499        | -0,261        | - | 0,083         | -0,06       | 0,322        | 0,594        | -0,183       | - | 0,060        |
| caudate     | 0,01         | 0,914        | 0,914        | -0,198        | - | 0,221         | 0,07         | 0,495        | 0,660        | -0,135        | - | 0,280         | 0,06        | 0,335        | 0,594        | -0,063       | - | 0,184        |
| putamen     | <b>-0,23</b> | <b>0,021</b> | <b>0,056</b> | <b>-0,427</b> | - | <b>-0,034</b> | -0,14        | 0,208        | 0,499        | -0,346        | - | 0,075         | 0,10        | 0,183        | 0,594        | -0,045       | - | 0,235        |
| pallidum    | -0,01        | 0,91         | 0,914        | -0,217        | - | 0,194         | 0,04         | 0,69         | 0,690        | -0,163        | - | 0,246         | 0,05        | 0,371        | 0,594        | -0,064       | - | 0,170        |
| hippocampus | <b>-0,22</b> | <b>0,009</b> | <b>0,036</b> | <b>-0,389</b> | - | <b>-0,054</b> | <b>-0,19</b> | <b>0,026</b> | <b>0,208</b> | <b>-0,356</b> | - | <b>-0,023</b> | 0,03        | 0,525        | 0,700        | -0,068       | - | 0,133        |
| amygdala    | -0,24        | 0,085        | 0,170        | -0,504        | - | 0,032         | -0,22        | 0,099        | 0,396        | -0,493        | - | 0,043         | 0,01        | 0,836        | 0,836        | -0,094       | - | 0,116        |
| accumbens   | -0,15        | 0,13         | 0,208        | -0,354        | - | 0,046         | -0,12        | 0,296        | 0,499        | -0,336        | - | 0,102         | 0,04        | 0,631        | 0,721        | -0,114       | - | 0,189        |
| ICV         | <b>-0,28</b> | <b>0,001</b> | <b>0,008</b> | <b>-0,446</b> | - | <b>-0,110</b> | -0,05        | 0,629        | 0,690        | -0,247        | - | 0,149         | <b>0,23</b> | <b>0,002</b> | <b>0,016</b> | <b>0,082</b> | - | <b>0,375</b> |

Significant results, corrected for multiple comparisons (FDR P-value  $\leq 0.05$ ), are color-coded red; trend significant results (nominal P-value  $< 0.05$ ) are color-coded orange.

A negative Effect size indicates a smaller volume of region x in patient group y versus patient group z; a positive Effect size indicates a larger volume of region x in patient group y versus patient group z.

**Supplementary Table S15:** mega-analytic results for cortical thickness of each structure comparing pediatric ADHD, ASD and OCD patients, controlling for age, sex and scan site.

| ROI                              | ADHD vs OCD |         |             |                | ASD vs OCD   |              |              |                        | ASD vs ADHD  |              |              |                        |
|----------------------------------|-------------|---------|-------------|----------------|--------------|--------------|--------------|------------------------|--------------|--------------|--------------|------------------------|
|                                  | Effect size | P-value | FDR P-value | 95% CI         | Effect size  | P-value      | FDR P-value  | 95% CI                 | Effect size  | P-value      | FDR P-value  | 95% CI                 |
| banks superior temporal sulcus   | 0,07        | 0,554   | 0,693       | -0,167 - 0,312 | -0,03        | 0,820        | 0,978        | -0,294 - 0,233         | -0,10        | 0,265        | 0,532        | -0,284 - 0,078         |
| caudal anterior cingulate cortex | -0,06       | 0,594   | 0,693       | -0,285 - 0,163 | -0,16        | 0,237        | 0,933        | -0,424 - 0,105         | -0,10        | 0,319        | 0,532        | -0,292 - 0,095         |
| caudal middle frontal gyrus      | 0,13        | 0,229   | 0,606       | -0,083 - 0,348 | 0,04         | 0,753        | 0,978        | -0,222 - 0,307         | -0,09        | 0,378        | 0,554        | -0,291 - 0,110         |
| cuneus cortex                    | 0,01        | 0,894   | 0,920       | -0,197 - 0,226 | 0,05         | 0,706        | 0,978        | -0,206 - 0,303         | 0,03         | 0,724        | 0,768        | -0,157 - 0,226         |
| entorhinal cortex                | -0,10       | 0,346   | 0,606       | -0,318 - 0,112 | <b>-0,29</b> | <b>0,019</b> | <b>0,630</b> | <b>-0,540 - -0,048</b> | <b>-0,19</b> | <b>0,029</b> | <b>0,333</b> | <b>-0,362 - -0,019</b> |
| fusiform gyrus                   | -0,12       | 0,264   | 0,606       | -0,337 - 0,092 | -0,22        | 0,093        | 0,819        | -0,467 - 0,036         | -0,09        | 0,317        | 0,532        | -0,276 - 0,090         |
| inferior parietal cortex         | 0,17        | 0,129   | 0,606       | -0,051 - 0,397 | 0,09         | 0,538        | 0,978        | -0,189 - 0,363         | -0,09        | 0,414        | 0,572        | -0,295 - 0,122         |
| inferior temporal gyrus          | -0,04       | 0,735   | 0,804       | -0,246 - 0,174 | -0,18        | 0,179        | 0,933        | -0,438 - 0,081         | -0,14        | 0,159        | 0,532        | -0,339 - 0,056         |
| isthmus cingulate cortex         | -0,13       | 0,319   | 0,606       | -0,384 - 0,125 | -0,09        | 0,439        | 0,978        | -0,316 - 0,137         | 0,04         | 0,659        | 0,744        | -0,138 - 0,218         |
| lateral occipital cortex         | -0,03       | 0,788   | 0,836       | -0,242 - 0,184 | -0,10        | 0,459        | 0,978        | -0,362 - 0,163         | -0,07        | 0,490        | 0,635        | -0,269 - 0,129         |
| lateral orbitofrontal cortex     | 0,07        | 0,497   | 0,669       | -0,129 - 0,266 | -0,05        | 0,672        | 0,978        | -0,284 - 0,183         | -0,12        | 0,175        | 0,532        | -0,290 - 0,053         |
| lingual gyrus                    | -0,15       | 0,127   | 0,606       | -0,352 - 0,044 | -0,14        | 0,240        | 0,933        | -0,376 - 0,094         | 0,01         | 0,884        | 0,884        | -0,162 - 0,188         |
| medial orbitofrontal cortex      | 0,13        | 0,191   | 0,606       | -0,066 - 0,328 | 0,04         | 0,762        | 0,978        | -0,218 - 0,298         | -0,09        | 0,380        | 0,554        | -0,296 - 0,113         |
| middle temporal gyrus            | 0,13        | 0,266   | 0,606       | -0,096 - 0,348 | -0,09        | 0,488        | 0,978        | -0,359 - 0,171         | <b>-0,22</b> | <b>0,028</b> | <b>0,333</b> | <b>-0,417 - -0,023</b> |
| parahippocampal gyrus            | -0,11       | 0,323   | 0,606       | -0,336 - 0,111 | -0,20        | 0,105        | 0,819        | -0,445 - 0,042         | -0,09        | 0,289        | 0,532        | -0,254 - 0,076         |
| paracentral lobule               | 0,04        | 0,717   | 0,804       | -0,179 - 0,261 | -0,03        | 0,818        | 0,978        | -0,273 - 0,216         | -0,07        | 0,425        | 0,572        | -0,240 - 0,101         |
| pars opercularis                 | 0,01        | 0,959   | 0,959       | -0,219 - 0,231 | -0,10        | 0,475        | 0,978        | -0,364 - 0,169         | -0,10        | 0,304        | 0,532        | -0,300 - 0,094         |
| pars orbitalis                   | 0,11        | 0,327   | 0,606       | -0,109 - 0,327 | 0,00         | 0,990        | 0,990        | -0,259 - 0,255         | -0,11        | 0,254        | 0,532        | -0,300 - 0,079         |
| pars triangularis                | 0,12        | 0,261   | 0,606       | -0,092 - 0,338 | -0,03        | 0,815        | 0,978        | -0,310 - 0,244         | -0,16        | 0,159        | 0,532        | -0,374 - 0,061         |
| pericalcarine cortex             | -0,09       | 0,413   | 0,662       | -0,298 - 0,123 | 0,08         | 0,467        | 0,978        | -0,132 - 0,288         | <b>0,17</b>  | <b>0,009</b> | <b>0,315</b> | <b>0,041 - 0,291</b>   |
| postcentral gyrus                | -0,06       | 0,587   | 0,693       | -0,290 - 0,164 | -0,10        | 0,377        | 0,978        | -0,328 - 0,124         | -0,04        | 0,568        | 0,686        | -0,173 - 0,095         |
| posterior cingulate cortex       | -0,12       | 0,275   | 0,606       | -0,348 - 0,099 | -0,21        | 0,117        | 0,819        | -0,476 - 0,053         | -0,09        | 0,378        | 0,554        | -0,282 - 0,107         |
| precentral gyrus                 | -0,08       | 0,473   | 0,662       | -0,311 - 0,144 | -0,12        | 0,358        | 0,978        | -0,365 - 0,132         | -0,03        | 0,697        | 0,762        | -0,202 - 0,135         |

|                                          |       |       |       |        |   |       |              |              |              |               |   |               |              |              |              |               |   |               |
|------------------------------------------|-------|-------|-------|--------|---|-------|--------------|--------------|--------------|---------------|---|---------------|--------------|--------------|--------------|---------------|---|---------------|
| <b>precuneus cortex</b>                  | 0,09  | 0,436 | 0,662 | -0,131 | - | 0,303 | 0,05         | 0,699        | 0,978        | -0,216        | - | 0,322         | -0,03        | 0,751        | 0,773        | -0,239        | - | 0,173         |
| <b>rostral anterior cingulate cortex</b> | 0,20  | 0,107 | 0,606 | -0,043 | - | 0,438 | 0,07         | 0,581        | 0,978        | -0,170        | - | 0,303         | -0,13        | 0,221        | 0,532        | -0,342        | - | 0,079         |
| <b>rostral middle frontal gyrus</b>      | 0,07  | 0,454 | 0,662 | -0,120 | - | 0,268 | 0,01         | 0,950        | 0,978        | -0,254        | - | 0,271         | -0,07        | 0,543        | 0,679        | -0,278        | - | 0,146         |
| <b>superior frontal gyrus</b>            | 0,15  | 0,163 | 0,606 | -0,059 | - | 0,352 | 0,01         | 0,942        | 0,978        | -0,243        | - | 0,262         | -0,14        | 0,159        | 0,532        | -0,328        | - | 0,054         |
| <b>superior parietal cortex</b>          | 0,12  | 0,261 | 0,606 | -0,092 | - | 0,340 | 0,01         | 0,921        | 0,978        | -0,239        | - | 0,265         | -0,11        | 0,233        | 0,532        | -0,294        | - | 0,072         |
| <b>superior temporal gyrus</b>           | 0,08  | 0,455 | 0,662 | -0,134 | - | 0,298 | -0,06        | 0,649        | 0,978        | -0,336        | - | 0,209         | -0,15        | 0,176        | 0,532        | -0,356        | - | 0,065         |
| <b>supramarginal gyrus</b>               | 0,11  | 0,335 | 0,606 | -0,113 | - | 0,332 | -0,02        | 0,909        | 0,978        | -0,294        | - | 0,262         | -0,13        | 0,246        | 0,532        | -0,338        | - | 0,087         |
| <b>frontal pole</b>                      | -0,11 | 0,309 | 0,606 | -0,325 | - | 0,103 | -0,16        | 0,221        | 0,933        | -0,409        | - | 0,095         | -0,05        | 0,626        | 0,730        | -0,232        | - | 0,139         |
| <b>temporal pole</b>                     | -0,12 | 0,275 | 0,606 | -0,331 | - | 0,094 | <b>-0,25</b> | <b>0,036</b> | <b>0,630</b> | <b>-0,486</b> | - | <b>-0,017</b> | -0,13        | 0,106        | 0,532        | -0,295        | - | 0,028         |
| <b>transverse temporal cortex</b>        | 0,13  | 0,256 | 0,606 | -0,091 | - | 0,343 | -0,10        | 0,464        | 0,978        | -0,381        | - | 0,174         | <b>-0,23</b> | <b>0,038</b> | <b>0,333</b> | <b>-0,447</b> | - | <b>-0,013</b> |
| <b>insula</b>                            | 0,10  | 0,334 | 0,606 | -0,106 | - | 0,313 | -0,01        | 0,930        | 0,978        | -0,248        | - | 0,227         | -0,11        | 0,181        | 0,532        | -0,281        | - | 0,053         |
| <b>average thickness</b>                 | 0,06  | 0,584 | 0,693 | -0,152 | - | 0,270 | -0,07        | 0,641        | 0,978        | -0,343        | - | 0,211         | -0,12        | 0,267        | 0,532        | -0,345        | - | 0,096         |

Trend significant results (nominal P-value < 0.05) are color-coded orange.

A negative Effect size indicates a thinner cortex of region x in patient group y versus patient group z; a positive Effect size indicates a thicker cortex of region x in patient group y versus patient group z.

**Supplementary Table S16:** mega-analytic results for surface area of each structure comparing pediatric ADHD, ASD and OCD patients, controlling for age, sex, ICV, and scan site.

| ROI                                     | ADHD vs OCD |         |             |        |         | ASD vs OCD   |              |              |               |                 | ASD vs ADHD  |              |              |               |                 |
|-----------------------------------------|-------------|---------|-------------|--------|---------|--------------|--------------|--------------|---------------|-----------------|--------------|--------------|--------------|---------------|-----------------|
|                                         | Effect size | P-value | FDR P-value | 95% CI |         | Effect size  | P-value      | FDR P-value  | 95% CI        |                 | Effect size  | P-value      | FDR P-value  | 95% CI        |                 |
| <b>banks superior temporal sulcus</b>   | -0,12       | 0,250   | 0,875       | -0,321 | - 0,084 | <b>-0,25</b> | <b>0,016</b> | <b>0,560</b> | <b>-0,451</b> | <b>- -0,046</b> | <b>-0,13</b> | <b>0,036</b> | <b>0,252</b> | <b>-0,251</b> | <b>- -0,008</b> |
| <b>caudal anterior cingulate cortex</b> | -0,14       | 0,173   | 0,875       | -0,334 | - 0,060 | -0,10        | 0,332        | 0,732        | -0,295        | - 0,100         | 0,04         | 0,520        | 0,638        | -0,080        | - 0,158         |
| <b>caudal middle frontal gyrus</b>      | -0,04       | 0,717   | 0,929       | -0,235 | - 0,162 | -0,08        | 0,456        | 0,732        | -0,274        | - 0,123         | -0,04        | 0,529        | 0,638        | -0,160        | - 0,082         |
| <b>cuneus cortex</b>                    | 0,17        | 0,099   | 0,875       | -0,032 | - 0,371 | 0,12         | 0,245        | 0,732        | -0,082        | - 0,322         | -0,05        | 0,431        | 0,636        | -0,173        | - 0,074         |
| <b>entorhinal cortex</b>                | -0,05       | 0,652   | 0,929       | -0,275 | - 0,172 | 0,10         | 0,369        | 0,732        | -0,121        | - 0,326         | <b>0,15</b>  | <b>0,020</b> | <b>0,175</b> | <b>0,024</b>  | <b>- 0,284</b>  |
| <b>fusiform gyrus</b>                   | -0,08       | 0,399   | 0,929       | -0,258 | - 0,103 | -0,04        | 0,678        | 0,879        | -0,234        | - 0,152         | 0,04         | 0,574        | 0,670        | -0,091        | - 0,165         |
| <b>inferior parietal cortex</b>         | 0,00        | 0,979   | 1,000       | -0,180 | - 0,185 | -0,02        | 0,849        | 0,880        | -0,222        | - 0,183         | -0,02        | 0,756        | 0,805        | -0,161        | - 0,117         |
| <b>inferior temporal gyrus</b>          | -0,26       | 0,083   | 0,875       | -0,562 | - 0,034 | -0,11        | 0,502        | 0,732        | -0,439        | - 0,215         | 0,15         | 0,113        | 0,439        | -0,036        | - 0,340         |
| <b>isthmus cingulate cortex</b>         | -0,09       | 0,406   | 0,929       | -0,288 | - 0,117 | 0,10         | 0,347        | 0,732        | -0,105        | - 0,300         | <b>0,18</b>  | <b>0,003</b> | <b>0,070</b> | <b>0,060</b>  | <b>- 0,305</b>  |
| <b>lateral occipital cortex</b>         | -0,05       | 0,574   | 0,929       | -0,238 | - 0,132 | 0,03         | 0,746        | 0,880        | -0,155        | - 0,216         | 0,08         | 0,142        | 0,452        | -0,028        | - 0,196         |
| <b>lateral orbitofrontal cortex</b>     | -0,04       | 0,676   | 0,929       | -0,208 | - 0,135 | 0,03         | 0,779        | 0,880        | -0,162        | - 0,216         | 0,06         | 0,342        | 0,636        | -0,068        | - 0,195         |
| <b>lingual gyrus</b>                    | -0,11       | 0,299   | 0,929       | -0,305 | - 0,094 | -0,09        | 0,363        | 0,732        | -0,293        | - 0,107         | 0,01         | 0,837        | 0,862        | -0,110        | - 0,135         |
| <b>medial orbitofrontal cortex</b>      | 0,03        | 0,753   | 0,941       | -0,145 | - 0,201 | 0,07         | 0,463        | 0,732        | -0,124        | - 0,272         | 0,05         | 0,523        | 0,638        | -0,096        | - 0,188         |
| <b>middle temporal gyrus</b>            | -0,04       | 0,623   | 0,929       | -0,215 | - 0,129 | -0,14        | 0,146        | 0,732        | -0,325        | - 0,048         | -0,10        | 0,139        | 0,452        | -0,222        | - 0,031         |
| <b>parahippocampal gyrus</b>            | -0,17       | 0,110   | 0,875       | -0,386 | - 0,039 | -0,13        | 0,226        | 0,732        | -0,344        | - 0,081         | 0,04         | 0,522        | 0,638        | -0,086        | - 0,170         |
| <b>paracentral lobule</b>               | 0,04        | 0,710   | 0,929       | -0,159 | - 0,234 | <b>0,22</b>  | <b>0,032</b> | <b>0,560</b> | <b>0,019</b>  | <b>- 0,413</b>  | <b>0,18</b>  | <b>0,004</b> | <b>0,070</b> | <b>0,057</b>  | <b>- 0,299</b>  |
| <b>pars opercularis</b>                 | 0,13        | 0,197   | 0,875       | -0,068 | - 0,332 | 0,07         | 0,476        | 0,732        | -0,128        | - 0,274         | -0,06        | 0,347        | 0,636        | -0,182        | - 0,064         |
| <b>pars orbitalis</b>                   | 0,05        | 0,580   | 0,929       | -0,133 | - 0,238 | 0,07         | 0,459        | 0,732        | -0,116        | - 0,256         | 0,02         | 0,759        | 0,805        | -0,095        | - 0,131         |
| <b>pars triangularis</b>                | 0,00        | 0,970   | 1,000       | -0,207 | - 0,199 | -0,08        | 0,452        | 0,732        | -0,281        | - 0,125         | -0,07        | 0,246        | 0,574        | -0,199        | - 0,051         |
| <b>pericalcarine cortex</b>             | 0,13        | 0,234   | 0,875       | -0,083 | - 0,340 | 0,06         | 0,579        | 0,779        | -0,152        | - 0,272         | -0,07        | 0,299        | 0,616        | -0,197        | - 0,061         |
| <b>postcentral gyrus</b>                | 0,05        | 0,603   | 0,929       | -0,138 | - 0,238 | 0,11         | 0,308        | 0,732        | -0,099        | - 0,313         | 0,06         | 0,426        | 0,636        | -0,084        | - 0,198         |
| <b>posterior cingulate cortex</b>       | -0,12       | 0,222   | 0,875       | -0,315 | - 0,073 | 0,02         | 0,850        | 0,880        | -0,176        | - 0,213         | <b>0,14</b>  | <b>0,019</b> | <b>0,175</b> | <b>0,023</b>  | <b>- 0,257</b>  |
| <b>precentral gyrus</b>                 | 0,05        | 0,583   | 0,929       | -0,127 | - 0,226 | 0,12         | 0,173        | 0,732        | -0,054        | - 0,300         | 0,07         | 0,178        | 0,479        | -0,033        | - 0,180         |

|                                          |       |       |       |        |   |       |       |       |       |        |   |       |      |       |       |        |   |       |
|------------------------------------------|-------|-------|-------|--------|---|-------|-------|-------|-------|--------|---|-------|------|-------|-------|--------|---|-------|
| <b>precuneus cortex</b>                  | -0,01 | 0,903 | 1,000 | -0,192 | - | 0,169 | 0,08  | 0,384 | 0,732 | -0,101 | - | 0,261 | 0,09 | 0,103 | 0,439 | -0,019 | - | 0,202 |
| <b>rostral anterior cingulate cortex</b> | -0,13 | 0,144 | 0,875 | -0,307 | - | 0,045 | -0,09 | 0,305 | 0,732 | -0,268 | - | 0,084 | 0,04 | 0,469 | 0,638 | -0,067 | - | 0,145 |
| <b>rostral middle frontal gyrus</b>      | -0,02 | 0,823 | 0,960 | -0,189 | - | 0,150 | 0,01  | 0,880 | 0,880 | -0,169 | - | 0,197 | 0,03 | 0,598 | 0,675 | -0,091 | - | 0,158 |
| <b>superior frontal gyrus</b>            | 0,02  | 0,782 | 0,944 | -0,138 | - | 0,184 | 0,07  | 0,408 | 0,732 | -0,102 | - | 0,250 | 0,05 | 0,398 | 0,636 | -0,068 | - | 0,171 |
| <b>superior parietal cortex</b>          | 0,04  | 0,667 | 0,929 | -0,149 | - | 0,233 | 0,09  | 0,342 | 0,732 | -0,098 | - | 0,284 | 0,05 | 0,389 | 0,636 | -0,065 | - | 0,166 |
| <b>superior temporal gyrus</b>           | -0,07 | 0,449 | 0,929 | -0,244 | - | 0,108 | -0,07 | 0,497 | 0,732 | -0,257 | - | 0,125 | 0,00 | 0,978 | 0,978 | -0,127 | - | 0,131 |
| <b>supramarginal gyrus</b>               | -0,07 | 0,445 | 0,929 | -0,262 | - | 0,115 | 0,02  | 0,800 | 0,880 | -0,164 | - | 0,213 | 0,10 | 0,085 | 0,430 | -0,014 | - | 0,210 |
| <b>frontal pole</b>                      | 0,00  | 1,000 | 1,000 | -0,207 | - | 0,207 | 0,09  | 0,402 | 0,732 | -0,119 | - | 0,296 | 0,09 | 0,172 | 0,479 | -0,039 | - | 0,216 |
| <b>temporal pole</b>                     | -0,14 | 0,181 | 0,875 | -0,354 | - | 0,067 | -0,06 | 0,576 | 0,779 | -0,271 | - | 0,151 | 0,08 | 0,203 | 0,508 | -0,045 | - | 0,212 |
| <b>transverse temporal cortex</b>        | -0,01 | 0,919 | 1,000 | -0,215 | - | 0,194 | 0,10  | 0,339 | 0,732 | -0,105 | - | 0,305 | 0,11 | 0,086 | 0,430 | -0,016 | - | 0,237 |
| <b>insula</b>                            | -0,04 | 0,643 | 0,929 | -0,211 | - | 0,130 | 0,01  | 0,875 | 0,880 | -0,157 | - | 0,184 | 0,05 | 0,297 | 0,616 | -0,047 | - | 0,155 |
| <b>full surface area</b>                 | -0,03 | 0,657 | 0,929 | -0,168 | - | 0,106 | 0,02  | 0,848 | 0,880 | -0,145 | - | 0,176 | 0,05 | 0,436 | 0,636 | -0,071 | - | 0,164 |

Trend significant results (nominal P-value < 0.05) are color-coded orange.

A negative Effect size indicates a smaller surface area of region x in patient group y versus patient group z; a positive Effect size indicates a larger surface area of region x in patient group y versus patient group z.

**Supplementary Table S17:** mega-analytic results for each subcortical structure comparing adolescent ADHD, ASD and OCD patients, controlling for age, sex, ICV, and scan site.

| ROI                | ADHD vs OCD  |              |              |               |   | ASD vs OCD    |              |              |              |               | ASD vs ADHD |               |             |              |              |              |   |              |
|--------------------|--------------|--------------|--------------|---------------|---|---------------|--------------|--------------|--------------|---------------|-------------|---------------|-------------|--------------|--------------|--------------|---|--------------|
|                    | Effect size  | P-value      | FDR P-value  | 95% CI        |   | Effect size   | P-value      | FDR P-value  | 95% CI       |               | Effect size | P-value       | FDR P-value | 95% CI       |              |              |   |              |
| <b>thalamus</b>    | -0,07        | 0,297        | 0,662        | -0,208        | - | 0,064         | <b>-0,16</b> | <b>0,013</b> | <b>0,104</b> | <b>-0,282</b> | -           | <b>-0,033</b> | -0,08       | 0,165        | 0,660        | -0,204       | - | 0,035        |
| <b>caudate</b>     | -0,10        | 0,237        | 0,662        | -0,261        | - | 0,064         | -0,13        | 0,101        | 0,404        | -0,279        | -           | 0,025         | -0,03       | 0,688        | 0,840        | -0,172       | - | 0,113        |
| <b>putamen</b>     | -0,04        | 0,579        | 0,662        | -0,202        | - | 0,113         | -0,12        | 0,209        | 0,462        | -0,296        | -           | 0,065         | -0,07       | 0,413        | 0,840        | -0,241       | - | 0,099        |
| <b>pallidum</b>    | -0,06        | 0,488        | 0,662        | -0,214        | - | 0,102         | -0,11        | 0,231        | 0,462        | -0,277        | -           | 0,067         | -0,05       | 0,546        | 0,840        | -0,208       | - | 0,110        |
| <b>hippocampus</b> | -0,05        | 0,546        | 0,662        | -0,191        | - | 0,101         | -0,02        | 0,769        | 0,866        | -0,177        | -           | 0,131         | 0,02        | 0,765        | 0,840        | -0,123       | - | 0,167        |
| <b>amygdala</b>    | -0,05        | 0,497        | 0,662        | -0,207        | - | 0,100         | -0,04        | 0,684        | 0,866        | -0,211        | -           | 0,139         | 0,02        | 0,840        | 0,840        | -0,148       | - | 0,182        |
| <b>accumbens</b>   | 0,01         | 0,889        | 0,889        | -0,145        | - | 0,168         | -0,02        | 0,866        | 0,866        | -0,239        | -           | 0,201         | -0,03       | 0,782        | 0,840        | -0,243       | - | 0,183        |
| <b>ICV</b>         | <b>-0,19</b> | <b>0,012</b> | <b>0,096</b> | <b>-0,344</b> | - | <b>-0,042</b> | 0,03         | 0,684        | 0,866        | -0,121        | -           | 0,184         | <b>0,22</b> | <b>0,001</b> | <b>0,008</b> | <b>0,093</b> | - | <b>0,356</b> |

Significant results, corrected for multiple comparisons (FDR P-value  $\leq 0.05$ ), are color-coded red; trend significant results (nominal P-value  $< 0.05$ ) are color-coded orange.

A negative Effect size indicates a smaller volume of region x in patient group y versus patient group z; a positive Effect size indicates a larger volume of region x in patient group y versus patient group z.

**Supplementary Table S18:** mega-analytic results for cortical thickness of each structure, comparing adolescent ADHD, ASD and OCD patients, controlling for age, sex and scan site.

| ROI                              | ADHD vs OCD |              |              |                      | ASD vs OCD  |         |             |                | ASD vs ADHD |         |             |                |
|----------------------------------|-------------|--------------|--------------|----------------------|-------------|---------|-------------|----------------|-------------|---------|-------------|----------------|
|                                  | Effect size | P-value      | FDR P-value  | 95% CI               | Effect size | P-value | FDR P-value | 95% CI         | Effect size | P-value | FDR P-value | 95% CI         |
| banks superior temporal sulcus   | 0,12        | 0,152        | 0,528        | -0,045 - 0,292       | -0,07       | 0,547   | 0,999       | -0,292 - 0,155 | -0,19       | 0,066   | 0,647       | -0,396 - 0,012 |
| caudal anterior cingulate cortex | -0,05       | 0,573        | 0,806        | -0,210 - 0,116       | -0,15       | 0,145   | 0,999       | -0,359 - 0,053 | -0,11       | 0,266   | 0,647       | -0,293 - 0,081 |
| caudal middle frontal gyrus      | 0,04        | 0,684        | 0,894        | -0,170 - 0,259       | -0,02       | 0,900   | 0,999       | -0,280 - 0,246 | -0,06       | 0,561   | 0,701       | -0,267 - 0,145 |
| cuneus cortex                    | 0,11        | 0,181        | 0,528        | -0,052 - 0,277       | 0,03        | 0,773   | 0,999       | -0,194 - 0,261 | -0,08       | 0,462   | 0,647       | -0,290 - 0,132 |
| entorhinal cortex                | 0,00        | 0,954        | 0,982        | -0,171 - 0,161       | -0,11       | 0,271   | 0,999       | -0,312 - 0,088 | -0,11       | 0,234   | 0,647       | -0,284 - 0,069 |
| fusiform gyrus                   | -0,01       | 0,890        | 0,973        | -0,162 - 0,141       | -0,05       | 0,629   | 0,999       | -0,250 - 0,151 | -0,04       | 0,682   | 0,770       | -0,223 - 0,146 |
| inferior parietal cortex         | 0,18        | 0,105        | 0,525        | -0,038 - 0,401       | 0,11        | 0,429   | 0,999       | -0,162 - 0,381 | -0,07       | 0,495   | 0,647       | -0,279 - 0,135 |
| inferior temporal gyrus          | 0,14        | 0,076        | 0,496        | -0,015 - 0,295       | 0,06        | 0,563   | 0,999       | -0,143 - 0,264 | -0,08       | 0,405   | 0,647       | -0,267 - 0,108 |
| isthmus cingulate cortex         | 0,09        | 0,297        | 0,564        | -0,076 - 0,250       | 0,03        | 0,774   | 0,999       | -0,195 - 0,262 | -0,05       | 0,622   | 0,727       | -0,266 - 0,159 |
| lateral occipital cortex         | <b>0,21</b> | <b>0,006</b> | <b>0,210</b> | <b>0,059 - 0,362</b> | 0,11        | 0,322   | 0,999       | -0,110 - 0,336 | -0,10       | 0,359   | 0,647       | -0,307 - 0,111 |
| lateral orbitofrontal cortex     | -0,03       | 0,690        | 0,894        | -0,192 - 0,127       | -0,08       | 0,450   | 0,999       | -0,293 - 0,130 | -0,05       | 0,623   | 0,727       | -0,244 - 0,146 |
| lingual gyrus                    | 0,02        | 0,848        | 0,957        | -0,141 - 0,172       | 0,00        | 0,983   | 0,999       | -0,247 - 0,241 | -0,02       | 0,878   | 0,904       | -0,248 - 0,212 |
| medial orbitofrontal cortex      | 0,08        | 0,351        | 0,614        | -0,087 - 0,245       | -0,02       | 0,853   | 0,999       | -0,242 - 0,200 | -0,10       | 0,337   | 0,647       | -0,303 - 0,104 |
| middle temporal gyrus            | 0,07        | 0,392        | 0,653        | -0,091 - 0,232       | -0,02       | 0,866   | 0,999       | -0,218 - 0,183 | -0,09       | 0,344   | 0,647       | -0,270 - 0,094 |
| parahippocampal gyrus            | -0,10       | 0,275        | 0,564        | -0,267 - 0,076       | -0,08       | 0,348   | 0,999       | -0,255 - 0,090 | 0,01        | 0,865   | 0,904       | -0,135 - 0,161 |
| paracentral lobule               | 0,02        | 0,830        | 0,957        | -0,179 - 0,223       | -0,07       | 0,557   | 0,999       | -0,304 - 0,164 | -0,09       | 0,320   | 0,647       | -0,274 - 0,089 |
| pars opercularis                 | 0,10        | 0,227        | 0,530        | -0,064 - 0,268       | -0,03       | 0,804   | 0,999       | -0,231 - 0,179 | -0,13       | 0,175   | 0,647       | -0,314 - 0,057 |
| pars orbitalis                   | 0,11        | 0,211        | 0,528        | -0,062 - 0,279       | 0,03        | 0,771   | 0,999       | -0,179 - 0,242 | -0,08       | 0,427   | 0,647       | -0,269 - 0,114 |
| pars triangularis                | 0,12        | 0,135        | 0,528        | -0,038 - 0,283       | -0,01       | 0,922   | 0,999       | -0,232 - 0,210 | -0,13       | 0,202   | 0,647       | -0,338 - 0,071 |
| pericalcarine cortex             | 0,01        | 0,920        | 0,976        | -0,155 - 0,172       | 0,00        | 0,990   | 0,999       | -0,210 - 0,213 | -0,01       | 0,943   | 0,943       | -0,201 - 0,187 |
| postcentral gyrus                | 0,11        | 0,210        | 0,528        | -0,059 - 0,270       | 0,04        | 0,686   | 0,999       | -0,157 - 0,239 | -0,06       | 0,480   | 0,647       | -0,243 - 0,114 |
| posterior cingulate cortex       | <b>0,20</b> | <b>0,017</b> | <b>0,298</b> | <b>0,035 - 0,359</b> | 0,04        | 0,712   | 0,999       | -0,176 - 0,258 | -0,16       | 0,126   | 0,647       | -0,357 - 0,044 |
| precentral gyrus                 | 0,03        | 0,739        | 0,924        | -0,137 - 0,194       | 0,00        | 0,999   | 0,999       | -0,202 - 0,202 | -0,03       | 0,761   | 0,832       | -0,211 - 0,154 |

|                                          |             |              |              |              |   |              |       |       |       |        |   |       |       |       |       |        |   |       |
|------------------------------------------|-------------|--------------|--------------|--------------|---|--------------|-------|-------|-------|--------|---|-------|-------|-------|-------|--------|---|-------|
| <b>precuneus cortex</b>                  | 0,06        | 0,553        | 0,806        | -0,144       | - | 0,269        | -0,02 | 0,865 | 0,999 | -0,263 | - | 0,221 | -0,08 | 0,378 | 0,647 | -0,269 | - | 0,102 |
| <b>rostral anterior cingulate cortex</b> | 0,00        | 1,000        | 1,000        | -0,161       | - | 0,161        | -0,11 | 0,227 | 0,999 | -0,301 | - | 0,071 | -0,11 | 0,175 | 0,647 | -0,281 | - | 0,051 |
| <b>rostral middle frontal gyrus</b>      | 0,12        | 0,153        | 0,528        | -0,043       | - | 0,273        | 0,01  | 0,943 | 0,999 | -0,237 | - | 0,255 | -0,11 | 0,371 | 0,647 | -0,338 | - | 0,126 |
| <b>superior frontal gyrus</b>            | <b>0,17</b> | <b>0,038</b> | <b>0,443</b> | <b>0,010</b> | - | <b>0,336</b> | -0,02 | 0,872 | 0,999 | -0,244 | - | 0,206 | -0,19 | 0,071 | 0,647 | -0,399 | - | 0,017 |
| <b>superior parietal cortex</b>          | 0,17        | 0,085        | 0,496        | -0,024       | - | 0,372        | 0,11  | 0,369 | 0,999 | -0,129 | - | 0,347 | -0,07 | 0,499 | 0,647 | -0,253 | - | 0,123 |
| <b>superior temporal gyrus</b>           | 0,10        | 0,249        | 0,545        | -0,068       | - | 0,261        | -0,03 | 0,772 | 0,999 | -0,241 | - | 0,179 | -0,13 | 0,191 | 0,647 | -0,319 | - | 0,064 |
| <b>supramarginal gyrus</b>               | 0,10        | 0,306        | 0,564        | -0,096       | - | 0,305        | -0,05 | 0,706 | 0,999 | -0,298 | - | 0,202 | -0,15 | 0,138 | 0,647 | -0,355 | - | 0,049 |
| <b>frontal pole</b>                      | 0,02        | 0,835        | 0,957        | -0,152       | - | 0,188        | -0,08 | 0,504 | 0,999 | -0,300 | - | 0,147 | -0,09 | 0,369 | 0,647 | -0,300 | - | 0,112 |
| <b>temporal pole</b>                     | -0,11       | 0,202        | 0,528        | -0,276       | - | 0,058        | -0,04 | 0,710 | 0,999 | -0,239 | - | 0,162 | 0,07  | 0,446 | 0,647 | -0,111 | - | 0,252 |
| <b>transverse temporal cortex</b>        | 0,05        | 0,509        | 0,806        | -0,106       | - | 0,214        | -0,03 | 0,820 | 0,999 | -0,272 | - | 0,215 | -0,08 | 0,483 | 0,647 | -0,312 | - | 0,147 |
| <b>insula</b>                            | -0,04       | 0,576        | 0,806        | -0,197       | - | 0,109        | -0,10 | 0,286 | 0,999 | -0,297 | - | 0,088 | -0,06 | 0,493 | 0,647 | -0,235 | - | 0,113 |
| <b>average thickness</b>                 | 0,15        | 0,053        | 0,464        | -0,002       | - | 0,310        | 0,02  | 0,848 | 0,999 | -0,203 | - | 0,247 | -0,13 | 0,219 | 0,647 | -0,343 | - | 0,079 |

Trend significant results (nominal P-value < 0.05) are color-coded orange.

A negative Effect size indicates a thinner cortex of region x in patient group y versus patient group z; a positive Effect size indicates a thicker cortex of region x in patient group y versus patient group z.

**Supplementary Table S19:** mega-analytic results for surface area of each structure comparing adolescent ADHD, ASD and OCD patients, controlling for age, sex, ICV, and scan site.

| ROI                              | ADHD vs OCD |              |              |                      | ASD vs OCD  |              |              |                      | ASD vs ADHD |         |             |                |
|----------------------------------|-------------|--------------|--------------|----------------------|-------------|--------------|--------------|----------------------|-------------|---------|-------------|----------------|
|                                  | Effect size | P-value      | FDR P-value  | 95% CI               | Effect size | P-value      | FDR P-value  | 95% CI               | Effect size | P-value | FDR P-value | 95% CI         |
| banks superior temporal sulcus   | 0,00        | 0,971        | 0,979        | -0,158 - 0,152       | -0,06       | 0,424        | 0,905        | -0,219 - 0,092       | -0,06       | 0,367   | 0,964       | -0,192 - 0,071 |
| caudal anterior cingulate cortex | 0,04        | 0,626        | 0,979        | -0,115 - 0,192       | 0,03        | 0,749        | 0,905        | -0,130 - 0,181       | -0,01       | 0,851   | 0,964       | -0,146 - 0,120 |
| caudal middle frontal gyrus      | -0,07       | 0,378        | 0,882        | -0,217 - 0,082       | -0,05       | 0,520        | 0,905        | -0,201 - 0,101       | 0,02        | 0,790   | 0,964       | -0,112 - 0,148 |
| cuneus cortex                    | -0,01       | 0,937        | 0,979        | -0,157 - 0,145       | 0,04        | 0,671        | 0,905        | -0,140 - 0,217       | 0,04        | 0,585   | 0,964       | -0,116 - 0,205 |
| entorhinal cortex                | 0,00        | 0,979        | 0,979        | -0,167 - 0,171       | 0,01        | 0,903        | 0,964        | -0,159 - 0,180       | 0,01        | 0,908   | 0,964       | -0,133 - 0,150 |
| fusiform gyrus                   | 0,00        | 0,971        | 0,979        | -0,139 - 0,134       | -0,03       | 0,706        | 0,905        | -0,194 - 0,132       | -0,03       | 0,701   | 0,964       | -0,176 - 0,118 |
| inferior parietal cortex         | 0,05        | 0,486        | 0,979        | -0,090 - 0,190       | 0,06        | 0,485        | 0,905        | -0,104 - 0,220       | 0,01        | 0,914   | 0,964       | -0,136 - 0,151 |
| inferior temporal gyrus          | -0,03       | 0,667        | 0,979        | -0,166 - 0,106       | -0,08       | 0,343        | 0,905        | -0,249 - 0,087       | -0,05       | 0,509   | 0,964       | -0,205 - 0,102 |
| isthmus cingulate cortex         | -0,14       | 0,063        | 0,651        | -0,286 - 0,008       | -0,10       | 0,190        | 0,905        | -0,248 - 0,049       | 0,04        | 0,545   | 0,964       | -0,089 - 0,168 |
| lateral occipital cortex         | -0,05       | 0,434        | 0,949        | -0,190 - 0,082       | -0,01       | 0,936        | 0,964        | -0,177 - 0,163       | 0,05        | 0,548   | 0,964       | -0,107 - 0,202 |
| lateral orbitofrontal cortex     | 0,11        | 0,093        | 0,651        | -0,019 - 0,246       | 0,02        | 0,802        | 0,905        | -0,154 - 0,199       | -0,09       | 0,275   | 0,964       | -0,255 - 0,073 |
| lingual gyrus                    | -0,04       | 0,594        | 0,979        | -0,199 - 0,114       | -0,07       | 0,415        | 0,905        | -0,224 - 0,092       | -0,02       | 0,739   | 0,964       | -0,159 - 0,113 |
| medial orbitofrontal cortex      | <b>0,22</b> | <b>0,001</b> | <b>0,035</b> | <b>0,086 - 0,352</b> | 0,11        | 0,163        | 0,905        | -0,045 - 0,266       | -0,11       | 0,128   | 0,964       | -0,248 - 0,031 |
| middle temporal gyrus            | 0,02        | 0,765        | 0,979        | -0,110 - 0,150       | -0,02       | 0,797        | 0,905        | -0,171 - 0,132       | -0,04       | 0,567   | 0,964       | -0,175 - 0,096 |
| parahippocampal gyrus            | 0,03        | 0,718        | 0,979        | -0,128 - 0,186       | 0,08        | 0,312        | 0,905        | -0,077 - 0,241       | 0,05        | 0,448   | 0,964       | -0,084 - 0,190 |
| paracentral lobule               | <b>0,18</b> | <b>0,019</b> | <b>0,333</b> | <b>0,030 - 0,334</b> | <b>0,16</b> | <b>0,041</b> | <b>0,905</b> | <b>0,006 - 0,314</b> | -0,02       | 0,744   | 0,964       | -0,155 - 0,111 |
| pars opercularis                 | -0,08       | 0,359        | 0,882        | -0,256 - 0,093       | -0,03       | 0,752        | 0,905        | -0,180 - 0,130       | 0,06        | 0,478   | 0,964       | -0,100 - 0,213 |
| pars orbitalis                   | 0,11        | 0,144        | 0,730        | -0,037 - 0,250       | 0,09        | 0,212        | 0,905        | -0,053 - 0,237       | -0,01       | 0,822   | 0,964       | -0,140 - 0,111 |
| pars triangularis                | -0,01       | 0,948        | 0,979        | -0,155 - 0,145       | -0,01       | 0,917        | 0,964        | -0,160 - 0,144       | 0,00        | 0,964   | 0,964       | -0,134 - 0,128 |
| pericalcarine cortex             | -0,10       | 0,238        | 0,833        | -0,256 - 0,064       | -0,11       | 0,194        | 0,905        | -0,268 - 0,054       | -0,01       | 0,880   | 0,964       | -0,149 - 0,128 |
| postcentral gyrus                | 0,06        | 0,369        | 0,882        | -0,073 - 0,198       | -0,03       | 0,702        | 0,905        | -0,197 - 0,133       | -0,09       | 0,214   | 0,964       | -0,244 - 0,055 |
| posterior cingulate cortex       | 0,13        | 0,085        | 0,651        | -0,017 - 0,268       | 0,12        | 0,118        | 0,905        | -0,029 - 0,260       | -0,01       | 0,873   | 0,964       | -0,135 - 0,115 |
| precentral gyrus                 | -0,03       | 0,665        | 0,979        | -0,163 - 0,104       | -0,02       | 0,766        | 0,905        | -0,155 - 0,115       | 0,01        | 0,879   | 0,964       | -0,107 - 0,125 |

|                                          |       |       |       |        |   |       |       |       |       |        |   |       |       |       |       |        |   |       |
|------------------------------------------|-------|-------|-------|--------|---|-------|-------|-------|-------|--------|---|-------|-------|-------|-------|--------|---|-------|
| <b>precuneus cortex</b>                  | -0,04 | 0,522 | 0,979 | -0,178 | - | 0,090 | -0,04 | 0,659 | 0,905 | -0,204 | - | 0,129 | 0,01  | 0,935 | 0,964 | -0,145 | - | 0,158 |
| <b>rostral anterior cingulate cortex</b> | 0,02  | 0,814 | 0,979 | -0,125 | - | 0,159 | 0,00  | 0,969 | 0,969 | -0,165 | - | 0,172 | -0,01 | 0,859 | 0,964 | -0,165 | - | 0,138 |
| <b>rostral middle frontal gyrus</b>      | 0,08  | 0,227 | 0,833 | -0,051 | - | 0,214 | 0,08  | 0,259 | 0,905 | -0,057 | - | 0,212 | 0,00  | 0,941 | 0,964 | -0,120 | - | 0,112 |
| <b>superior frontal gyrus</b>            | 0,03  | 0,651 | 0,979 | -0,098 | - | 0,157 | 0,05  | 0,534 | 0,905 | -0,100 | - | 0,192 | 0,02  | 0,799 | 0,964 | -0,113 | - | 0,147 |
| <b>superior parietal cortex</b>          | -0,07 | 0,322 | 0,882 | -0,213 | - | 0,070 | -0,02 | 0,777 | 0,905 | -0,164 | - | 0,123 | 0,05  | 0,420 | 0,964 | -0,073 | - | 0,174 |
| <b>superior temporal gyrus</b>           | 0,01  | 0,846 | 0,979 | -0,121 | - | 0,147 | -0,02 | 0,726 | 0,905 | -0,158 | - | 0,110 | -0,04 | 0,525 | 0,964 | -0,152 | - | 0,078 |
| <b>supramarginal gyrus</b>               | -0,08 | 0,294 | 0,882 | -0,216 | - | 0,065 | -0,14 | 0,055 | 0,905 | -0,281 | - | 0,003 | -0,06 | 0,298 | 0,964 | -0,184 | - | 0,056 |
| <b>frontal pole</b>                      | -0,10 | 0,223 | 0,833 | -0,260 | - | 0,061 | 0,03  | 0,775 | 0,905 | -0,156 | - | 0,209 | 0,13  | 0,130 | 0,964 | -0,037 | - | 0,289 |
| <b>temporal pole</b>                     | -0,01 | 0,893 | 0,979 | -0,172 | - | 0,149 | -0,07 | 0,422 | 0,905 | -0,228 | - | 0,095 | -0,06 | 0,437 | 0,964 | -0,194 | - | 0,084 |
| <b>transverse temporal cortex</b>        | -0,01 | 0,862 | 0,979 | -0,169 | - | 0,141 | -0,07 | 0,445 | 0,905 | -0,241 | - | 0,106 | -0,05 | 0,495 | 0,964 | -0,209 | - | 0,101 |
| <b>insula</b>                            | 0,10  | 0,146 | 0,730 | -0,034 | - | 0,232 | 0,06  | 0,484 | 0,905 | -0,103 | - | 0,216 | -0,04 | 0,566 | 0,964 | -0,185 | - | 0,101 |
| <b>full surface area</b>                 | 0,00  | 0,940 | 0,979 | -0,110 | - | 0,102 | -0,03 | 0,671 | 0,905 | -0,170 | - | 0,109 | -0,03 | 0,691 | 0,964 | -0,155 | - | 0,103 |

Significant results, corrected for multiple comparisons (FDR P-value  $\leq 0.05$ ), are color-coded red; trend significant results (nominal P-value  $< 0.05$ ) are color-coded orange.

A negative Effect size indicates a smaller surface area of region x in patient group y versus patient group z; a positive Effect size indicates a larger surface area of region x in patient group y versus patient group z.

**Supplementary Table S20:** mega-analytic results for each subcortical structure comparing adult ADHD, ASD and OCD patients, controlling for age, sex, ICV, and scan site.

| ROI                | ADHD vs OCD |              |              |                      | ASD vs OCD  |         |             |                | ASD vs ADHD |         |             |               |
|--------------------|-------------|--------------|--------------|----------------------|-------------|---------|-------------|----------------|-------------|---------|-------------|---------------|
|                    | Effect size | P-value      | FDR P-value  | 95% CI               | Effect size | P-value | FDR P-value | 95% CI         | Effect size | P-value | FDR P-value | 95% CI        |
| <b>thalamus</b>    | 0,05        | 0,247        | 0,816        | -0,035 - 0,136       | 0,11        | 0,097   | 0,776       | -0,019 - 0,233 | 0,06        | 0,403   | 0,920       | -0,075 - 0,19 |
| <b>caudate</b>     | -0,02       | 0,677        | 0,903        | -0,113 - 0,074       | 0,00        | 0,983   | 0,983       | -0,107 - 0,105 | 0,02        | 0,763   | 0,921       | -0,103 - 0,14 |
| <b>putamen</b>     | -0,01       | 0,792        | 0,905        | -0,095 - 0,073       | -0,10       | 0,294   | 0,983       | -0,284 - 0,086 | -0,09       | 0,098   | 0,392       | -0,279 - 0,10 |
| <b>pallidum</b>    | -0,05       | 0,370        | 0,816        | -0,145 - 0,054       | -0,05       | 0,533   | 0,983       | -0,225 - 0,116 | -0,01       | 0,921   | 0,921       | -0,184 - 0,17 |
| <b>hippocampus</b> | <b>0,09</b> | <b>0,046</b> | <b>0,368</b> | <b>0,002 - 0,182</b> | -0,02       | 0,709   | 0,983       | -0,122 - 0,083 | -0,11       | 0,064   | 0,392       | -0,229 - 0,01 |
| <b>amygdala</b>    | 0,04        | 0,408        | 0,816        | -0,052 - 0,129       | -0,02       | 0,770   | 0,983       | -0,173 - 0,128 | -0,06       | 0,460   | 0,920       | -0,222 - 0,10 |
| <b>accumbens</b>   | -0,02       | 0,616        | 0,903        | -0,108 - 0,064       | -0,05       | 0,583   | 0,983       | -0,220 - 0,124 | -0,03       | 0,777   | 0,921       | -0,207 - 0,15 |
| <b>ICV</b>         | 0,00        | 0,946        | 0,946        | -0,090 - 0,084       | 0,00        | 0,947   | 0,983       | -0,142 - 0,152 | 0,01        | 0,920   | 0,921       | -0,148 - 0,16 |

Trend significant results (nominal P-value < 0.05) are color-coded orange.

A negative Effect size indicates a smaller volume of region x in patient group y versus patient group z; a positive Effect size indicates a larger volume of region x in patient group y versus patient group z.

**Supplementary Table S21:** mega-analytic results for cortical thickness of each structure comparing adult ADHD, ASD and OCD patients, controlling for age, sex and scan site.

| ROI                              | ADHD vs OCD |              |              |                      | ASD vs OCD  |              |              |                      | ASD vs ADHD |              |              |                      |
|----------------------------------|-------------|--------------|--------------|----------------------|-------------|--------------|--------------|----------------------|-------------|--------------|--------------|----------------------|
|                                  | Effect size | P-value      | FDR P-value  | 95% CI               | Effect size | P-value      | FDR P-value  | 95% CI               | Effect size | P-value      | FDR P-value  | 95% CI               |
| banks superior temporal sulcus   | 0,09        | 0,102        | 0,400        | -0,018 - 0,203       | 0,06        | 0,344        | 0,608        | -0,064 - 0,183       | -0,03       | 0,604        | 0,813        | -0,156 - 0,091       |
| caudal anterior cingulate cortex | -0,09       | 0,070        | 0,370        | -0,185 - 0,007       | 0,07        | 0,382        | 0,608        | -0,085 - 0,222       | 0,16        | 0,059        | 0,229        | -0,006 - 0,321       |
| caudal middle frontal gyrus      | 0,05        | 0,391        | 0,573        | -0,067 - 0,170       | 0,14        | 0,134        | 0,361        | -0,042 - 0,317       | 0,09        | 0,325        | 0,739        | -0,085 - 0,255       |
| cuneus cortex                    | 0,04        | 0,430        | 0,602        | -0,063 - 0,148       | 0,14        | 0,216        | 0,434        | -0,082 - 0,361       | 0,10        | 0,395        | 0,739        | -0,127 - 0,321       |
| entorhinal cortex                | -0,06       | 0,257        | 0,529        | -0,167 - 0,045       | -0,10       | 0,370        | 0,608        | -0,332 - 0,124       | -0,04       | 0,721        | 0,869        | -0,279 - 0,193       |
| fusiform gyrus                   | 0,05        | 0,361        | 0,573        | -0,059 - 0,162       | -0,04       | 0,690        | 0,812        | -0,227 - 0,150       | -0,09       | 0,342        | 0,739        | -0,275 - 0,095       |
| inferior parietal cortex         | <b>0,17</b> | <b>0,006</b> | <b>0,105</b> | <b>0,047 - 0,284</b> | 0,10        | 0,223        | 0,434        | -0,061 - 0,260       | -0,07       | 0,387        | 0,739        | -0,216 - 0,084       |
| inferior temporal gyrus          | 0,10        | 0,074        | 0,370        | -0,010 - 0,216       | -0,04       | 0,696        | 0,812        | -0,229 - 0,153       | -0,14       | 0,148        | 0,432        | -0,333 - 0,050       |
| isthmus cingulate cortex         | 0,07        | 0,235        | 0,514        | -0,046 - 0,187       | 0,12        | 0,078        | 0,248        | -0,013 - 0,249       | 0,05        | 0,479        | 0,788        | -0,084 - 0,179       |
| lateral occipital cortex         | <b>0,17</b> | <b>0,002</b> | <b>0,070</b> | <b>0,059 - 0,275</b> | 0,05        | 0,612        | 0,812        | -0,135 - 0,229       | -0,12       | 0,200        | 0,510        | -0,303 - 0,063       |
| lateral orbitofrontal cortex     | 0,06        | 0,289        | 0,562        | -0,048 - 0,161       | <b>0,20</b> | <b>0,012</b> | <b>0,047</b> | <b>0,044 - 0,350</b> | 0,14        | 0,070        | 0,245        | -0,012 - 0,293       |
| lingual gyrus                    | 0,07        | 0,213        | 0,497        | -0,039 - 0,175       | 0,09        | 0,372        | 0,608        | -0,111 - 0,297       | 0,02        | 0,814        | 0,869        | -0,183 - 0,233       |
| medial orbitofrontal cortex      | 0,05        | 0,322        | 0,573        | -0,046 - 0,141       | <b>0,30</b> | <b>0,000</b> | <b>0,000</b> | <b>0,157 - 0,446</b> | <b>0,25</b> | <b>0,001</b> | <b>0,018</b> | <b>0,100 - 0,409</b> |
| middle temporal gyrus            | 0,11        | 0,072        | 0,370        | -0,009 - 0,223       | 0,04        | 0,675        | 0,812        | -0,151 - 0,233       | -0,07       | 0,495        | 0,788        | -0,255 - 0,123       |
| parahippocampal gyrus            | 0,08        | 0,125        | 0,400        | -0,022 - 0,183       | -0,05       | 0,600        | 0,812        | -0,246 - 0,142       | -0,13       | 0,204        | 0,510        | -0,336 - 0,072       |
| paracentral lobule               | 0,00        | 0,979        | 0,979        | -0,104 - 0,102       | 0,07        | 0,406        | 0,618        | -0,099 - 0,244       | 0,07        | 0,401        | 0,739        | -0,099 - 0,246       |
| pars opercularis                 | 0,04        | 0,502        | 0,676        | -0,073 - 0,150       | <b>0,17</b> | <b>0,006</b> | <b>0,030</b> | <b>0,051 - 0,298</b> | <b>0,14</b> | <b>0,021</b> | <b>0,147</b> | <b>0,021 - 0,252</b> |
| pars orbitalis                   | 0,05        | 0,342        | 0,573        | -0,057 - 0,164       | <b>0,22</b> | <b>0,006</b> | <b>0,030</b> | <b>0,063 - 0,373</b> | <b>0,16</b> | <b>0,042</b> | <b>0,201</b> | <b>0,006 - 0,322</b> |
| pars triangularis                | 0,05        | 0,393        | 0,573        | -0,063 - 0,160       | <b>0,30</b> | <b>0,000</b> | <b>0,000</b> | <b>0,179 - 0,428</b> | <b>0,25</b> | <b>0,000</b> | <b>0,000</b> | <b>0,136 - 0,374</b> |
| pericalcarine cortex             | -0,01       | 0,897        | 0,976        | -0,093 - 0,081       | 0,03        | 0,768        | 0,867        | -0,155 - 0,210       | 0,03        | 0,732        | 0,869        | -0,156 - 0,223       |
| postcentral gyrus                | 0,03        | 0,571        | 0,740        | -0,077 - 0,140       | -0,02       | 0,847        | 0,898        | -0,182 - 0,149       | -0,05       | 0,568        | 0,813        | -0,211 - 0,116       |
| posterior cingulate cortex       | 0,01        | 0,920        | 0,976        | -0,093 - 0,103       | <b>0,24</b> | <b>0,001</b> | <b>0,009</b> | <b>0,099 - 0,388</b> | <b>0,24</b> | <b>0,002</b> | <b>0,023</b> | <b>0,090 - 0,387</b> |
| precentral gyrus                 | 0,00        | 0,978        | 0,979        | -0,112 - 0,115       | -0,02       | 0,843        | 0,898        | -0,178 - 0,145       | -0,02       | 0,817        | 0,869        | -0,169 - 0,134       |

|                                          |       |       |       |        |   |       |             |              |              |              |   |              |             |              |              |              |   |              |
|------------------------------------------|-------|-------|-------|--------|---|-------|-------------|--------------|--------------|--------------|---|--------------|-------------|--------------|--------------|--------------|---|--------------|
| <b>precuneus cortex</b>                  | 0,12  | 0,052 | 0,370 | -0,001 | - | 0,249 | 0,11        | 0,120        | 0,350        | -0,028       | - | 0,246        | -0,02       | 0,804        | 0,869        | -0,136       | - | 0,106        |
| <b>rostral anterior cingulate cortex</b> | -0,07 | 0,162 | 0,405 | -0,157 | - | 0,026 | 0,10        | 0,205        | 0,434        | -0,053       | - | 0,247        | <b>0,16</b> | <b>0,046</b> | <b>0,201</b> | <b>0,003</b> | - | <b>0,321</b> |
| <b>rostral middle frontal gyrus</b>      | 0,08  | 0,112 | 0,400 | -0,020 | - | 0,190 | <b>0,24</b> | <b>0,010</b> | <b>0,044</b> | <b>0,059</b> | - | <b>0,424</b> | 0,16        | 0,092        | 0,293        | -0,026       | - | 0,339        |
| <b>superior frontal gyrus</b>            | 0,03  | 0,643 | 0,776 | -0,094 | - | 0,152 | <b>0,24</b> | <b>0,004</b> | <b>0,028</b> | <b>0,076</b> | - | <b>0,402</b> | <b>0,21</b> | <b>0,006</b> | <b>0,053</b> | <b>0,059</b> | - | <b>0,361</b> |
| <b>superior parietal cortex</b>          | 0,11  | 0,064 | 0,370 | -0,006 | - | 0,221 | 0,06        | 0,529        | 0,771        | -0,123       | - | 0,239        | -0,05       | 0,581        | 0,813        | -0,225       | - | 0,126        |
| <b>superior temporal gyrus</b>           | 0,03  | 0,608 | 0,760 | -0,072 | - | 0,122 | -0,01       | 0,921        | 0,927        | -0,228       | - | 0,206        | -0,04       | 0,750        | 0,869        | -0,260       | - | 0,188        |
| <b>supramarginal gyrus</b>               | 0,10  | 0,126 | 0,400 | -0,028 | - | 0,229 | 0,09        | 0,184        | 0,429        | -0,045       | - | 0,235        | -0,01       | 0,927        | 0,927        | -0,125       | - | 0,114        |
| <b>frontal pole</b>                      | 0,05  | 0,351 | 0,573 | -0,053 | - | 0,150 | <b>0,20</b> | <b>0,001</b> | <b>0,009</b> | <b>0,077</b> | - | <b>0,316</b> | <b>0,15</b> | <b>0,030</b> | <b>0,175</b> | <b>0,015</b> | - | <b>0,282</b> |
| <b>temporal pole</b>                     | -0,08 | 0,153 | 0,405 | -0,181 | - | 0,028 | -0,16       | 0,161        | 0,403        | -0,388       | - | 0,064        | -0,09       | 0,475        | 0,788        | -0,321       | - | 0,149        |
| <b>transverse temporal cortex</b>        | 0,01  | 0,885 | 0,976 | -0,093 | - | 0,108 | -0,01       | 0,927        | 0,927        | -0,195       | - | 0,178        | -0,02       | 0,872        | 0,898        | -0,213       | - | 0,181        |
| <b>insula</b>                            | 0,02  | 0,721 | 0,841 | -0,088 | - | 0,127 | 0,04        | 0,636        | 0,812        | -0,119       | - | 0,195        | 0,02        | 0,819        | 0,869        | -0,140       | - | 0,177        |
| <b>average thickness</b>                 | 0,09  | 0,137 | 0,400 | -0,028 | - | 0,204 | 0,12        | 0,055        | 0,193        | -0,003       | - | 0,251        | 0,04        | 0,529        | 0,805        | -0,077       | - | 0,150        |

Significant results, corrected for multiple comparisons (FDR P-value  $\leq 0.05$ ), are color-coded red; trend significant results (nominal P-value  $< 0.05$ ) are color-coded orange.

A negative Effect size indicates a thinner cortex of region x in patient group y versus patient group z; a positive Effect size indicates a thicker cortex of region x in patient group y versus patient group z.

**Supplementary Table S22:** mega-analytic results for surface area of each structure comparing adult ADHD, ASD and OCD patients, controlling for age, sex, ICV, and scan site.

| ROI                              | ADHD vs OCD  |              |              |                        | ASD vs OCD  |              |              |                      | ASD vs ADHD |              |              |                      |
|----------------------------------|--------------|--------------|--------------|------------------------|-------------|--------------|--------------|----------------------|-------------|--------------|--------------|----------------------|
|                                  | Effect size  | P-value      | FDR P-value  | 95% CI                 | Effect size | P-value      | FDR P-value  | 95% CI               | Effect size | P-value      | FDR P-value  | 95% CI               |
| banks superior temporal sulcus   | 0,00         | 0,949        | 0,974        | -0,101 - 0,094         | -0,10       | 0,147        | 0,639        | -0,238 - 0,036       | -0,10       | 0,190        | 0,793        | -0,244 - 0,048       |
| caudal anterior cingulate cortex | -0,04        | 0,467        | 0,956        | -0,136 - 0,062         | -0,04       | 0,635        | 0,823        | -0,187 - 0,114       | 0,00        | 0,997        | 1,000        | -0,160 - 0,161       |
| caudal middle frontal gyrus      | -0,02        | 0,758        | 0,956        | -0,121 - 0,088         | 0,04        | 0,540        | 0,756        | -0,082 - 0,157       | 0,05        | 0,393        | 0,815        | -0,070 - 0,178       |
| cuneus cortex                    | 0,03         | 0,614        | 0,956        | -0,081 - 0,137         | -0,07       | 0,276        | 0,639        | -0,193 - 0,055       | -0,10       | 0,139        | 0,793        | -0,225 - 0,032       |
| entorhinal cortex                | 0,01         | 0,812        | 0,956        | -0,096 - 0,123         | -0,07       | 0,292        | 0,639        | -0,190 - 0,057       | -0,08       | 0,255        | 0,793        | -0,217 - 0,058       |
| fusiform gyrus                   | -0,02        | 0,702        | 0,956        | -0,117 - 0,079         | -0,04       | 0,487        | 0,756        | -0,150 - 0,071       | -0,02       | 0,740        | 1,000        | -0,138 - 0,098       |
| inferior parietal cortex         | -0,05        | 0,247        | 0,956        | -0,144 - 0,037         | -0,06       | 0,273        | 0,639        | -0,165 - 0,047       | -0,01       | 0,921        | 1,000        | -0,123 - 0,111       |
| inferior temporal gyrus          | -0,03        | 0,468        | 0,956        | -0,126 - 0,058         | -0,07       | 0,178        | 0,639        | -0,177 - 0,033       | -0,04       | 0,528        | 0,853        | -0,157 - 0,081       |
| isthmus cingulate cortex         | 0,00         | 0,974        | 0,974        | -0,093 - 0,090         | 0,06        | 0,259        | 0,639        | -0,046 - 0,170       | 0,06        | 0,300        | 0,793        | -0,057 - 0,184       |
| lateral occipital cortex         | 0,02         | 0,696        | 0,956        | -0,083 - 0,125         | 0,08        | 0,193        | 0,639        | -0,040 - 0,196       | 0,06        | 0,340        | 0,793        | -0,061 - 0,176       |
| lateral orbitofrontal cortex     | -0,02        | 0,704        | 0,956        | -0,109 - 0,074         | -0,01       | 0,920        | 0,920        | -0,111 - 0,100       | 0,01        | 0,831        | 1,000        | -0,101 - 0,125       |
| lingual gyrus                    | 0,03         | 0,570        | 0,956        | -0,078 - 0,142         | -0,02       | 0,699        | 0,844        | -0,148 - 0,100       | -0,06       | 0,400        | 0,815        | -0,187 - 0,075       |
| medial orbitofrontal cortex      | -0,04        | 0,350        | 0,956        | -0,128 - 0,045         | 0,01        | 0,915        | 0,920        | -0,096 - 0,108       | 0,05        | 0,419        | 0,815        | -0,067 - 0,161       |
| middle temporal gyrus            | -0,04        | 0,444        | 0,956        | -0,125 - 0,055         | -0,12       | 0,095        | 0,639        | -0,257 - 0,021       | -0,08       | 0,272        | 0,793        | -0,232 - 0,065       |
| parahippocampal gyrus            | <b>-0,13</b> | <b>0,013</b> | <b>0,455</b> | <b>-0,225 - -0,027</b> | -0,01       | 0,865        | 0,917        | -0,124 - 0,104       | 0,12        | 0,076        | 0,793        | -0,012 - 0,245       |
| paracentral lobule               | 0,01         | 0,867        | 0,956        | -0,087 - 0,103         | 0,05        | 0,348        | 0,716        | -0,058 - 0,165       | 0,05        | 0,475        | 0,831        | -0,079 - 0,169       |
| pars opercularis                 | 0,05         | 0,286        | 0,956        | -0,044 - 0,149         | 0,09        | 0,111        | 0,639        | -0,021 - 0,205       | 0,04        | 0,536        | 0,853        | -0,086 - 0,165       |
| pars orbitalis                   | -0,04        | 0,387        | 0,956        | -0,132 - 0,051         | 0,04        | 0,513        | 0,756        | -0,072 - 0,143       | 0,08        | 0,213        | 0,793        | -0,044 - 0,196       |
| pars triangularis                | -0,02        | 0,738        | 0,956        | -0,123 - 0,087         | <b>0,14</b> | <b>0,021</b> | <b>0,368</b> | <b>0,022 - 0,262</b> | <b>0,16</b> | <b>0,012</b> | <b>0,420</b> | <b>0,035 - 0,284</b> |
| pericalcarine cortex             | -0,04        | 0,471        | 0,956        | -0,149 - 0,069         | -0,01       | 0,817        | 0,917        | -0,141 - 0,111       | 0,03        | 0,710        | 1,000        | -0,108 - 0,159       |
| postcentral gyrus                | -0,01        | 0,821        | 0,956        | -0,110 - 0,087         | 0,08        | 0,184        | 0,639        | -0,036 - 0,189       | 0,09        | 0,144        | 0,793        | -0,030 - 0,205       |
| posterior cingulate cortex       | -0,01        | 0,870        | 0,956        | -0,117 - 0,099         | -0,02       | 0,746        | 0,870        | -0,142 - 0,102       | -0,01       | 0,858        | 1,000        | -0,133 - 0,111       |
| precentral gyrus                 | 0,01         | 0,830        | 0,956        | -0,077 - 0,096         | 0,11        | 0,123        | 0,639        | -0,029 - 0,248       | 0,10        | 0,183        | 0,793        | -0,047 - 0,246       |

|                                   |       |       |       |        |   |       |       |       |       |        |   |       |       |       |       |        |   |       |
|-----------------------------------|-------|-------|-------|--------|---|-------|-------|-------|-------|--------|---|-------|-------|-------|-------|--------|---|-------|
| precuneus cortex                  | -0,03 | 0,469 | 0,956 | -0,120 | - | 0,055 | -0,03 | 0,617 | 0,823 | -0,130 | - | 0,077 | 0,01  | 0,917 | 1,000 | -0,109 | - | 0,122 |
| rostral anterior cingulate cortex | -0,01 | 0,874 | 0,956 | -0,102 | - | 0,086 | -0,02 | 0,680 | 0,844 | -0,133 | - | 0,087 | -0,02 | 0,804 | 1,000 | -0,138 | - | 0,107 |
| rostral middle frontal gyrus      | -0,05 | 0,311 | 0,956 | -0,139 | - | 0,044 | 0,04  | 0,473 | 0,756 | -0,067 | - | 0,144 | 0,09  | 0,128 | 0,793 | -0,025 | - | 0,196 |
| superior frontal gyrus            | -0,01 | 0,912 | 0,967 | -0,097 | - | 0,086 | 0,03  | 0,520 | 0,756 | -0,070 | - | 0,138 | 0,04  | 0,471 | 0,831 | -0,068 | - | 0,147 |
| superior parietal cortex          | 0,01  | 0,831 | 0,956 | -0,089 | - | 0,111 | 0,08  | 0,174 | 0,639 | -0,035 | - | 0,194 | 0,07  | 0,260 | 0,793 | -0,051 | - | 0,188 |
| superior temporal gyrus           | 0,02  | 0,606 | 0,956 | -0,067 | - | 0,115 | 0,06  | 0,373 | 0,725 | -0,077 | - | 0,206 | 0,04  | 0,598 | 0,910 | -0,110 | - | 0,191 |
| supramarginal gyrus               | 0,05  | 0,321 | 0,956 | -0,045 | - | 0,138 | 0,04  | 0,429 | 0,751 | -0,064 | - | 0,150 | 0,00  | 0,957 | 1,000 | -0,121 | - | 0,114 |
| frontal pole                      | -0,01 | 0,846 | 0,956 | -0,113 | - | 0,093 | -0,01 | 0,857 | 0,917 | -0,132 | - | 0,110 | 0,00  | 0,989 | 1,000 | -0,136 | - | 0,134 |
| temporal pole                     | -0,06 | 0,299 | 0,956 | -0,160 | - | 0,049 | -0,07 | 0,247 | 0,639 | -0,191 | - | 0,049 | -0,02 | 0,820 | 1,000 | -0,150 | - | 0,119 |
| transverse temporal cortex        | 0,06  | 0,243 | 0,956 | -0,044 | - | 0,173 | 0,17  | 0,005 | 0,175 | 0,052  | - | 0,297 | 0,11  | 0,102 | 0,793 | -0,022 | - | 0,242 |
| insula                            | -0,07 | 0,085 | 0,956 | -0,159 | - | 0,010 | 0,08  | 0,244 | 0,639 | -0,056 | - | 0,221 | 0,16  | 2,080 | 1,000 | 0,009  | - | 0,304 |
| full surface area                 | -0,01 | 0,849 | 0,956 | -0,091 | - | 0,075 | 0,04  | 0,413 | 0,751 | -0,055 | - | 0,134 | 0,05  | 0,340 | 0,793 | -0,050 | - | 0,146 |

Trend significant results (nominal P-value < 0.05) are color-coded orange.

A negative Effect size indicates a smaller surface area of region x in patient group y versus patient group z; a positive Effect size indicates a larger surface area of region x in patient group y versus patient group z.

**Supplementary Table S23:** mega-analytic results for each subcortical structure comparing unmedicated pediatric ADHD, ASD and OCD patients, controlling for age, sex, ICV, and scan site.

| ROI         | ADHD vs OCD  |              |              |               |   |               | ASD vs OCD   |              |              |               |             |               | ASD vs ADHD |              |              |              |   |              |
|-------------|--------------|--------------|--------------|---------------|---|---------------|--------------|--------------|--------------|---------------|-------------|---------------|-------------|--------------|--------------|--------------|---|--------------|
|             | Effect size  | P-value      | FDR P-value  | 95% CI        |   | Effect size   | P-value      | FDR P-value  | 95% CI       |               | Effect size | P-value       | FDR P-value | 95% CI       |              |              |   |              |
| thalamus    | -0.02        | 0.831        | 0.945        | -0.204        | - | 0.164         | -0.05        | 0.557        | 0.743        | -0.235        | -           | 0.127         | -0.03       | 0.615        | 0.960        | -0.168       | - | 0.099        |
| caudate     | -0.05        | 0.683        | 0.917        | -0.289        | - | 0.190         | 0.10         | 0.391        | 0.743        | -0.134        | -           | 0.344         | 0.15        | 0.076        | 0.304        | -0.016       | - | 0.325        |
| putamen     | -0.11        | 0.340        | 0.680        | -0.332        | - | 0.114         | -0.06        | 0.654        | 0.747        | -0.310        | -           | 0.195         | 0.05        | 0.609        | 0.960        | -0.145       | - | 0.247        |
| pallidum    | -0.01        | 0.945        | 0.945        | -0.241        | - | 0.224         | 0.03         | 0.782        | 0.782        | -0.201        | -           | 0.267         | 0.04        | 0.616        | 0.960        | -0.119       | - | 0.202        |
| hippocampus | -0.17        | 0.116        | 0.309        | -0.376        | - | 0.042         | -0.16        | 0.102        | 0.408        | -0.343        | -           | 0.031         | 0.01        | 0.894        | 0.960        | -0.153       | - | 0.175        |
| amygdala    | <b>-0.24</b> | <b>0.023</b> | <b>0.092</b> | <b>-0.455</b> | - | <b>-0.034</b> | <b>-0.25</b> | <b>0.021</b> | <b>0.168</b> | <b>-0.459</b> | -           | <b>-0.037</b> | 0.00        | 0.960        | 0.960        | -0.145       | - | 0.138        |
| accumbens   | -0.05        | 0.688        | 0.917        | -0.274        | - | 0.181         | -0.07        | 0.546        | 0.743        | -0.298        | -           | 0.158         | -0.02       | 0.776        | 0.960        | -0.187       | - | 0.139        |
| ICV         | <b>-0.32</b> | <b>0.001</b> | <b>0.008</b> | <b>-0.515</b> | - | <b>-0.126</b> | -0.13        | 0.212        | 0.565        | -0.323        | -           | 0.072         | <b>0.19</b> | <b>0.008</b> | <b>0.064</b> | <b>0.052</b> | - | <b>0.338</b> |

Significant results, corrected for multiple comparisons (FDR P-value  $\leq 0.05$ ), are color-coded red; trend significant results (nominal P-value  $< 0.05$ ) are color-coded orange.

A negative Effect size indicates a smaller volume of region x in patient group y versus patient group z; a positive Effect size indicates a larger volume of region x in patient group y versus patient group z.

**Supplementary Table S24:** mega-analytic results for each subcortical structure comparing medicated pediatric ADHD, ASD and OCD patients, controlling for age, sex, ICV, and scan site.

| ROI                | ADHD vs OCD  |              |              |                        | ASD vs OCD   |              |              |                        | ASD vs ADHD |              |              |                      |
|--------------------|--------------|--------------|--------------|------------------------|--------------|--------------|--------------|------------------------|-------------|--------------|--------------|----------------------|
|                    | Effect size  | P-value      | FDR P-value  | 95% CI                 | Effect size  | P-value      | FDR P-value  | 95% CI                 | Effect size | P-value      | FDR P-value  | 95% CI               |
| <b>thalamus</b>    | -0.15        | 0.307        | 0.491        | -0.432 - 0.136         | -0.19        | 0.138        | 0.276        | -0.444 - 0.061         | -0.04       | 0.724        | 0.839        | -0.282 - 0.196       |
| <b>caudate</b>     | 0.06         | 0.713        | 0.810        | -0.271 - 0.396         | 0.26         | 0.131        | 0.276        | -0.077 - 0.596         | 0.20        | 0.123        | 0.328        | -0.054 - 0.447       |
| <b>putamen</b>     | -0.27        | 0.072        | 0.144        | -0.571 - 0.024         | 0.03         | 0.827        | 0.945        | -0.266 - 0.333         | <b>0.31</b> | <b>0.010</b> | <b>0.080</b> | <b>0.075 - 0.538</b> |
| <b>pallidum</b>    | -0.04        | 0.810        | 0.810        | -0.355 - 0.278         | 0.04         | 0.803        | 0.945        | -0.278 - 0.359         | 0.08        | 0.513        | 0.821        | -0.158 - 0.317       |
| <b>hippocampus</b> | <b>-0.32</b> | <b>0.019</b> | <b>0.076</b> | <b>-0.597 - -0.053</b> | <b>-0.32</b> | <b>0.022</b> | <b>0.088</b> | <b>-0.594 - -0.045</b> | 0.01        | 0.963        | 0.963        | -0.208 - 0.219       |
| <b>amygdala</b>    | <b>-0.43</b> | <b>0.003</b> | <b>0.024</b> | <b>-0.721 - -0.146</b> | <b>-0.35</b> | <b>0.017</b> | <b>0.088</b> | <b>-0.642 - -0.063</b> | 0.08        | 0.478        | 0.821        | -0.142 - 0.304       |
| <b>accumbens</b>   | <b>-0.31</b> | <b>0.048</b> | <b>0.128</b> | <b>-0.616 - -0.003</b> | -0.07        | 0.663        | 0.945        | -0.377 - 0.240         | 0.24        | 0.050        | 0.200        | 0.000 - 0.482        |
| <b>ICV</b>         | -0.04        | 0.790        | 0.810        | -0.316 - 0.240         | 0.00         | 1.000        | 1.000        | -0.283 - 0.283         | 0.04        | 0.734        | 0.839        | -0.180 - 0.256       |

Significant results, corrected for multiple comparisons (FDR P-value  $\leq 0.05$ ), are color-coded red; trend significant results (nominal P-value  $< 0.05$ ) are color-coded orange.

A negative Effect size indicates a smaller volume of region x in patient group y versus patient group z; a positive Effect size indicates a larger volume of region x in patient group y versus patient group z.

**Supplementary Table S25:** mega-analytic results for cortical thickness of each structure comparing unmedicated pediatric ADHD, ASD and OCD patients, controlling for age, sex and scan site.

| ROI                              | ADHD vs OCD |         |             |        |         | ASD vs OCD   |              |              |               |                 | ASD vs ADHD  |              |              |               |                 |
|----------------------------------|-------------|---------|-------------|--------|---------|--------------|--------------|--------------|---------------|-----------------|--------------|--------------|--------------|---------------|-----------------|
|                                  | Effect size | P-value | FDR P-value | 95% CI |         | Effect size  | P-value      | FDR P-value  | 95% CI        |                 | Effect size  | P-value      | FDR P-value  | 95% CI        |                 |
| banks superior temporal sulcus   | 0.03        | 0.861   | 0.994       | -0.258 | - 0.308 | -0.01        | 0.929        | 0.985        | -0.295        | - 0.269         | -0.04        | 0.709        | 0.856        | -0.238        | - 0.162         |
| caudal anterior cingulate cortex | -0.07       | 0.587   | 0.796       | -0.328 | - 0.186 | -0.20        | 0.130        | 0.626        | -0.457        | - 0.058         | -0.13        | 0.169        | 0.603        | -0.311        | - 0.055         |
| caudal middle frontal gyrus      | 0.14        | 0.275   | 0.688       | -0.109 | - 0.385 | 0.09         | 0.558        | 0.985        | -0.205        | - 0.381         | -0.05        | 0.676        | 0.856        | -0.286        | - 0.186         |
| cuneus cortex                    | -0.01       | 0.924   | 0.994       | -0.262 | - 0.237 | 0.14         | 0.277        | 0.970        | -0.112        | - 0.390         | 0.15         | 0.099        | 0.603        | -0.028        | - 0.331         |
| entorhinal cortex                | -0.15       | 0.249   | 0.688       | -0.397 | - 0.103 | <b>-0.27</b> | <b>0.036</b> | <b>0.624</b> | <b>-0.518</b> | - <b>-0.018</b> | -0.12        | 0.168        | 0.603        | -0.292        | - 0.051         |
| fusiform gyrus                   | -0.15       | 0.250   | 0.688       | -0.407 | - 0.106 | -0.24        | 0.073        | 0.624        | -0.492        | - 0.022         | -0.08        | 0.363        | 0.758        | -0.267        | - 0.098         |
| inferior parietal cortex         | 0.20        | 0.144   | 0.688       | -0.067 | - 0.457 | 0.15         | 0.374        | 0.985        | -0.180        | - 0.480         | -0.05        | 0.741        | 0.857        | -0.317        | - 0.226         |
| inferior temporal gyrus          | 0.00        | 0.972   | 0.994       | -0.244 | - 0.253 | -0.19        | 0.143        | 0.626        | -0.435        | - 0.063         | <b>-0.19</b> | <b>0.035</b> | <b>0.455</b> | <b>-0.368</b> | - <b>-0.013</b> |
| isthmus cingulate cortex         | -0.18       | 0.168   | 0.688       | -0.448 | - 0.078 | -0.26        | 0.056        | 0.624        | -0.522        | - 0.007         | -0.07        | 0.449        | 0.758        | -0.262        | - 0.116         |
| lateral occipital cortex         | -0.01       | 0.948   | 0.994       | -0.261 | - 0.244 | -0.01        | 0.918        | 0.985        | -0.267        | - 0.240         | 0.00         | 0.958        | 0.986        | -0.185        | - 0.175         |
| lateral orbitofrontal cortex     | 0.11        | 0.362   | 0.707       | -0.123 | - 0.336 | 0.01         | 0.914        | 0.985        | -0.217        | - 0.243         | -0.09        | 0.266        | 0.665        | -0.259        | - 0.071         |
| lingual gyrus                    | -0.19       | 0.103   | 0.688       | -0.420 | - 0.038 | -0.08        | 0.498        | 0.985        | -0.310        | - 0.151         | 0.11         | 0.188        | 0.603        | -0.054        | - 0.277         |
| medial orbitofrontal cortex      | 0.18        | 0.100   | 0.688       | -0.035 | - 0.405 | 0.18         | 0.103        | 0.624        | -0.037        | - 0.404         | 0.00         | 0.988        | 0.988        | -0.159        | - 0.157         |
| middle temporal gyrus            | 0.12        | 0.390   | 0.707       | -0.148 | - 0.379 | -0.07        | 0.600        | 0.985        | -0.334        | - 0.193         | -0.19        | 0.052        | 0.455        | -0.374        | - 0.002         |
| parahippocampal gyrus            | -0.06       | 0.658   | 0.823       | -0.317 | - 0.200 | -0.16        | 0.238        | 0.926        | -0.417        | - 0.103         | -0.10        | 0.298        | 0.695        | -0.283        | - 0.087         |
| paracentral lobule               | 0.08        | 0.564   | 0.796       | -0.183 | - 0.335 | -0.04        | 0.755        | 0.985        | -0.301        | - 0.219         | -0.12        | 0.217        | 0.603        | -0.304        | - 0.069         |
| pars opercularis                 | 0.00        | 0.994   | 0.994       | -0.265 | - 0.263 | -0.07        | 0.598        | 0.985        | -0.336        | - 0.194         | -0.07        | 0.469        | 0.758        | -0.260        | - 0.120         |
| pars orbitalis                   | 0.10        | 0.424   | 0.707       | -0.149 | - 0.354 | 0.04         | 0.730        | 0.985        | -0.208        | - 0.298         | -0.06        | 0.529        | 0.758        | -0.239        | - 0.123         |
| pars triangularis                | 0.19        | 0.143   | 0.688       | -0.063 | - 0.435 | 0.00         | 0.985        | 0.985        | -0.248        | - 0.253         | <b>-0.18</b> | <b>0.046</b> | <b>0.455</b> | <b>-0.364</b> | - <b>-0.004</b> |
| pericalcarine cortex             | -0.14       | 0.252   | 0.688       | -0.378 | - 0.099 | 0.10         | 0.396        | 0.985        | -0.136        | - 0.343         | <b>0.24</b>  | <b>0.005</b> | <b>0.175</b> | <b>0.072</b>  | - <b>0.415</b>  |
| postcentral gyrus                | -0.07       | 0.591   | 0.796       | -0.337 | - 0.192 | -0.04        | 0.750        | 0.985        | -0.309        | - 0.223         | 0.03         | 0.759        | 0.857        | -0.158        | - 0.217         |
| posterior cingulate cortex       | -0.11       | 0.392   | 0.707       | -0.373 | - 0.146 | -0.23        | 0.086        | 0.624        | -0.488        | - 0.032         | -0.11        | 0.224        | 0.603        | -0.299        | - 0.070         |
| precentral gyrus                 | -0.15       | 0.286   | 0.688       | -0.412 | - 0.121 | -0.13        | 0.331        | 0.985        | -0.401        | - 0.135         | 0.01         | 0.899        | 0.953        | -0.177        | - 0.202         |

|                                          |       |       |       |                |       |       |       |                |       |       |       |                |
|------------------------------------------|-------|-------|-------|----------------|-------|-------|-------|----------------|-------|-------|-------|----------------|
| <b>precuneus cortex</b>                  | 0.10  | 0.423 | 0.707 | -0.151 - 0.360 | 0.12  | 0.363 | 0.985 | -0.138 - 0.376 | 0.01  | 0.874 | 0.953 | -0.169 - 0.199 |
| <b>rostral anterior cingulate cortex</b> | 0.21  | 0.084 | 0.688 | -0.028 - 0.441 | 0.09  | 0.437 | 0.985 | -0.142 - 0.328 | -0.11 | 0.182 | 0.603 | -0.280 - 0.053 |
| <b>rostral middle frontal gyrus</b>      | 0.11  | 0.341 | 0.707 | -0.113 - 0.327 | 0.06  | 0.596 | 0.985 | -0.161 - 0.280 | -0.05 | 0.559 | 0.758 | -0.206 - 0.111 |
| <b>superior frontal gyrus</b>            | 0.17  | 0.144 | 0.688 | -0.059 - 0.405 | 0.03  | 0.842 | 0.985 | -0.248 - 0.303 | -0.14 | 0.199 | 0.603 | -0.366 - 0.076 |
| <b>superior parietal cortex</b>          | 0.14  | 0.295 | 0.688 | -0.118 - 0.390 | 0.08  | 0.547 | 0.985 | -0.177 - 0.334 | -0.06 | 0.535 | 0.758 | -0.239 - 0.124 |
| <b>superior temporal gyrus</b>           | 0.06  | 0.637 | 0.823 | -0.197 - 0.322 | -0.05 | 0.743 | 0.985 | -0.365 - 0.260 | -0.11 | 0.375 | 0.758 | -0.369 - 0.139 |
| <b>supramarginal gyrus</b>               | 0.10  | 0.454 | 0.722 | -0.159 - 0.355 | 0.02  | 0.912 | 0.985 | -0.308 - 0.345 | -0.08 | 0.563 | 0.758 | -0.350 - 0.191 |
| <b>frontal pole</b>                      | 0.00  | 0.984 | 0.994 | -0.245 - 0.240 | -0.06 | 0.650 | 0.985 | -0.300 - 0.187 | -0.05 | 0.544 | 0.758 | -0.228 - 0.121 |
| <b>temporal pole</b>                     | -0.17 | 0.182 | 0.688 | -0.413 - 0.079 | -0.20 | 0.107 | 0.624 | -0.450 - 0.044 | -0.04 | 0.693 | 0.856 | -0.212 - 0.141 |
| <b>transverse temporal cortex</b>        | 0.17  | 0.198 | 0.688 | -0.089 - 0.428 | 0.02  | 0.876 | 0.985 | -0.239 - 0.280 | -0.15 | 0.118 | 0.603 | -0.336 - 0.038 |
| <b>insula</b>                            | 0.05  | 0.708 | 0.854 | -0.197 - 0.290 | -0.01 | 0.964 | 0.985 | -0.250 - 0.239 | -0.05 | 0.558 | 0.758 | -0.227 - 0.122 |
| <b>average thickness</b>                 | 0.07  | 0.563 | 0.796 | -0.176 - 0.324 | -0.01 | 0.943 | 0.985 | -0.325 - 0.302 | -0.09 | 0.522 | 0.758 | -0.346 - 0.175 |

Trend significant results (nominal P-value < 0.05) are color-coded orange.

A negative Effect size indicates a thinner cortex of region x in patient group y versus patient group z; a positive Effect size indicates a thicker cortex of region x in patient group y versus patient group z.

**Supplementary Table S26:** mega-analytic results for surface area of each structure comparing unmedicated pediatric ADHD, ASD and OCD patients, controlling for age, sex, ICV, and scan site.

| ROI                              | ADHD vs OCD |         |             |        |   | ASD vs OCD  |             |              |              |              | ASD vs ADHD |              |              |              |              |               |   |               |
|----------------------------------|-------------|---------|-------------|--------|---|-------------|-------------|--------------|--------------|--------------|-------------|--------------|--------------|--------------|--------------|---------------|---|---------------|
|                                  | Effect size | P-value | FDR P-value | 95% CI |   | Effect size | P-value     | FDR P-value  | 95% CI       |              | Effect size | P-value      | FDR P-value  | 95% CI       |              |               |   |               |
| banks superior temporal sulcus   | -0.14       | 0.235   | 0.754       | -0.372 | - | 0.091       | -0.14       | 0.234        | 0.768        | -0.371       | -           | 0.091        | 0.00         | 0.999        | 0.999        | -0.164        | - | 0.163         |
| caudal anterior cingulate cortex | -0.12       | 0.296   | 0.754       | -0.346 | - | 0.105       | -0.03       | 0.785        | 0.944        | -0.259       | -           | 0.196        | 0.09         | 0.281        | 0.820        | -0.073        | - | 0.250         |
| caudal middle frontal gyrus      | -0.02       | 0.886   | 0.922       | -0.244 | - | 0.211       | 0.01        | 0.939        | 0.966        | -0.220       | -           | 0.238        | 0.03         | 0.761        | 0.919        | -0.139        | - | 0.190         |
| cuneus cortex                    | 0.18        | 0.130   | 0.754       | -0.053 | - | 0.416       | 0.14        | 0.245        | 0.768        | -0.096       | -           | 0.376        | -0.04        | 0.633        | 0.919        | -0.211        | - | 0.128         |
| entorhinal cortex                | -0.05       | 0.714   | 0.922       | -0.304 | - | 0.208       | 0.08        | 0.566        | 0.944        | -0.182       | -           | 0.333        | 0.12         | 0.173        | 0.718        | -0.054        | - | 0.300         |
| fusiform gyrus                   | -0.10       | 0.350   | 0.754       | -0.302 | - | 0.107       | -0.06       | 0.562        | 0.944        | -0.266       | -           | 0.145        | 0.04         | 0.620        | 0.919        | -0.109        | - | 0.182         |
| inferior parietal cortex         | 0.03        | 0.812   | 0.922       | -0.182 | - | 0.232       | -0.04       | 0.711        | 0.944        | -0.246       | -           | 0.168        | -0.06        | 0.386        | 0.919        | -0.209        | - | 0.081         |
| inferior temporal gyrus          | -0.12       | 0.261   | 0.754       | -0.319 | - | 0.086       | -0.09       | 0.376        | 0.823        | -0.294       | -           | 0.111        | 0.02         | 0.739        | 0.919        | -0.120        | - | 0.169         |
| isthmus cingulate cortex         | -0.11       | 0.364   | 0.754       | -0.340 | - | 0.125       | 0.13        | 0.268        | 0.768        | -0.102       | -           | 0.366        | <b>0.24</b>  | <b>0.005</b> | <b>0.175</b> | <b>0.073</b>  | - | <b>0.406</b>  |
| lateral occipital cortex         | -0.05       | 0.669   | 0.922       | -0.259 | - | 0.166       | -0.02       | 0.876        | 0.958        | -0.231       | -           | 0.197        | 0.03         | 0.705        | 0.919        | -0.123        | - | 0.182         |
| lateral orbitofrontal cortex     | 0.02        | 0.867   | 0.922       | -0.176 | - | 0.208       | 0.04        | 0.656        | 0.944        | -0.149       | -           | 0.237        | 0.03         | 0.699        | 0.919        | -0.111        | - | 0.166         |
| lingual gyrus                    | -0.11       | 0.353   | 0.754       | -0.341 | - | 0.122       | -0.16       | 0.176        | 0.768        | -0.394       | -           | 0.072        | -0.05        | 0.549        | 0.919        | -0.219        | - | 0.116         |
| medial orbitofrontal cortex      | 0.09        | 0.388   | 0.754       | -0.108 | - | 0.279       | 0.03        | 0.797        | 0.944        | -0.169       | -           | 0.220        | -0.06        | 0.401        | 0.919        | -0.199        | - | 0.080         |
| middle temporal gyrus            | -0.03       | 0.775   | 0.922       | -0.223 | - | 0.166       | -0.05       | 0.638        | 0.944        | -0.241       | -           | 0.148        | -0.02        | 0.796        | 0.919        | -0.157        | - | 0.120         |
| parahippocampal gyrus            | -0.23       | 0.062   | 0.754       | -0.473 | - | 0.011       | -0.19       | 0.132        | 0.768        | -0.431       | -           | 0.056        | 0.04         | 0.622        | 0.919        | -0.130        | - | 0.217         |
| paracentral lobule               | 0.14        | 0.224   | 0.754       | -0.087 | - | 0.372       | <b>0.29</b> | <b>0.015</b> | <b>0.525</b> | <b>0.056</b> | -           | <b>0.518</b> | 0.14         | 0.088        | 0.616        | -0.022        | - | 0.311         |
| pars opercularis                 | 0.20        | 0.092   | 0.754       | -0.032 | - | 0.425       | 0.17        | 0.161        | 0.768        | -0.066       | -           | 0.396        | -0.03        | 0.711        | 0.919        | -0.197        | - | 0.135         |
| pars orbitalis                   | 0.09        | 0.381   | 0.754       | -0.117 | - | 0.306       | 0.11        | 0.298        | 0.768        | -0.100       | -           | 0.326        | 0.02         | 0.814        | 0.919        | -0.134        | - | 0.171         |
| pars triangularis                | 0.06        | 0.609   | 0.922       | -0.173 | - | 0.294       | -0.13       | 0.286        | 0.768        | -0.363       | -           | 0.107        | <b>-0.19</b> | <b>0.029</b> | <b>0.368</b> | <b>-0.359</b> | - | <b>-0.019</b> |
| pericalcarine cortex             | 0.15        | 0.224   | 0.754       | -0.094 | - | 0.400       | 0.04        | 0.764        | 0.944        | -0.211       | -           | 0.287        | -0.12        | 0.205        | 0.718        | -0.293        | - | 0.063         |
| postcentral gyrus                | 0.13        | 0.239   | 0.754       | -0.087 | - | 0.347       | 0.13        | 0.238        | 0.768        | -0.086       | -           | 0.348        | 0.00         | 0.994        | 0.999        | -0.154        | - | 0.155         |
| posterior cingulate cortex       | -0.01       | 0.912   | 0.922       | -0.235 | - | 0.210       | 0.06        | 0.590        | 0.944        | -0.162       | -           | 0.285        | 0.07         | 0.362        | 0.919        | -0.085        | - | 0.233         |
| precentral gyrus                 | 0.16        | 0.121   | 0.754       | -0.042 | - | 0.365       | 0.10        | 0.329        | 0.768        | -0.103       | -           | 0.307        | -0.06        | 0.424        | 0.919        | -0.205        | - | 0.086         |

|                                          |       |       |       |        |   |       |       |       |       |        |   |       |             |              |              |              |   |              |
|------------------------------------------|-------|-------|-------|--------|---|-------|-------|-------|-------|--------|---|-------|-------------|--------------|--------------|--------------|---|--------------|
| <b>precuneus cortex</b>                  | -0.02 | 0.831 | 0.922 | -0.225 | - | 0.181 | 0.06  | 0.561 | 0.944 | -0.144 | - | 0.265 | 0.08        | 0.270        | 0.820        | -0.064       | - | 0.229        |
| <b>rostral anterior cingulate cortex</b> | -0.03 | 0.767 | 0.922 | -0.225 | - | 0.166 | -0.01 | 0.924 | 0.966 | -0.206 | - | 0.187 | 0.02        | 0.779        | 0.919        | -0.120       | - | 0.160        |
| <b>rostral middle frontal gyrus</b>      | 0.04  | 0.649 | 0.922 | -0.147 | - | 0.236 | 0.04  | 0.677 | 0.944 | -0.152 | - | 0.233 | 0.00        | 0.959        | 0.999        | -0.142       | - | 0.135        |
| <b>superior frontal gyrus</b>            | 0.08  | 0.387 | 0.754 | -0.102 | - | 0.262 | 0.10  | 0.301 | 0.768 | -0.086 | - | 0.279 | 0.02        | 0.809        | 0.919        | -0.114       | - | 0.146        |
| <b>superior parietal cortex</b>          | 0.07  | 0.613 | 0.922 | -0.208 | - | 0.353 | 0.12  | 0.417 | 0.859 | -0.165 | - | 0.399 | 0.04        | 0.582        | 0.919        | -0.113       | - | 0.201        |
| <b>superior temporal gyrus</b>           | -0.01 | 0.922 | 0.922 | -0.210 | - | 0.190 | 0.10  | 0.320 | 0.768 | -0.098 | - | 0.300 | 0.11        | 0.122        | 0.712        | -0.030       | - | 0.252        |
| <b>supramarginal gyrus</b>               | -0.11 | 0.334 | 0.754 | -0.323 | - | 0.110 | 0.00  | 0.966 | 0.966 | -0.213 | - | 0.222 | 0.11        | 0.154        | 0.718        | -0.042       | - | 0.265        |
| <b>frontal pole</b>                      | 0.02  | 0.894 | 0.922 | -0.228 | - | 0.261 | 0.13  | 0.296 | 0.768 | -0.115 | - | 0.378 | 0.11        | 0.202        | 0.718        | -0.062       | - | 0.291        |
| <b>temporal pole</b>                     | -0.22 | 0.074 | 0.754 | -0.465 | - | 0.022 | -0.03 | 0.803 | 0.944 | -0.276 | - | 0.214 | <b>0.19</b> | <b>0.033</b> | <b>0.368</b> | <b>0.015</b> | - | <b>0.365</b> |
| <b>transverse temporal cortex</b>        | -0.04 | 0.730 | 0.922 | -0.280 | - | 0.196 | 0.14  | 0.259 | 0.768 | -0.102 | - | 0.378 | <b>0.18</b> | <b>0.042</b> | <b>0.368</b> | <b>0.007</b> | - | <b>0.354</b> |
| <b>insula</b>                            | -0.01 | 0.917 | 0.922 | -0.204 | - | 0.184 | 0.02  | 0.836 | 0.944 | -0.174 | - | 0.215 | 0.03        | 0.659        | 0.919        | -0.107       | - | 0.168        |
| <b>full surface area</b>                 | 0.02  | 0.837 | 0.922 | -0.133 | - | 0.165 | 0.02  | 0.833 | 0.944 | -0.158 | - | 0.196 | 0.00        | 0.963        | 0.999        | -0.141       | - | 0.148        |

Trend significant results (nominal P-value < 0.05) are color-coded orange.

A negative Effect size indicates a smaller surface area of region x in patient group y versus patient group z; a positive Effect size indicates a larger surface area of region x in patient group y versus patient group z.

**Supplementary Table S27:** mega-analytic results for cortical thickness of each structure comparing medicated pediatric ADHD, ASD and OCD patients, controlling for age, sex and scan site.

| ROI                                      | ADHD vs OCD |         |             |        |   | ASD vs OCD  |              |              |              |               | ASD vs ADHD |               |              |              |              |               |   |               |
|------------------------------------------|-------------|---------|-------------|--------|---|-------------|--------------|--------------|--------------|---------------|-------------|---------------|--------------|--------------|--------------|---------------|---|---------------|
|                                          | Effect size | P-value | FDR P-value | 95% CI |   | Effect size | P-value      | FDR P-value  | 95% CI       |               | Effect size | P-value       | FDR P-value  | 95% CI       |              |               |   |               |
| <b>banks superior temporal sulcus</b>    | 0.23        | 0.236   | 0.690       | -0.149 | - | 0.605       | -0.16        | 0.398        | 0.779        | -0.547        | -           | 0.217         | <b>-0.39</b> | <b>0.007</b> | <b>0.061</b> | <b>-0.680</b> | - | <b>-0.106</b> |
| <b>caudal anterior cingulate cortex</b>  | 0.02        | 0.907   | 0.935       | -0.333 | - | 0.375       | -0.19        | 0.292        | 0.779        | -0.553        | -           | 0.167         | -0.21        | 0.120        | 0.257        | -0.485        | - | 0.056         |
| <b>caudal middle frontal gyrus</b>       | 0.23        | 0.185   | 0.648       | -0.112 | - | 0.580       | -0.11        | 0.552        | 0.779        | -0.458        | -           | 0.245         | <b>-0.34</b> | <b>0.011</b> | <b>0.077</b> | <b>-0.605</b> | - | <b>-0.077</b> |
| <b>cuneus cortex</b>                     | 0.35        | 0.054   | 0.601       | -0.005 | - | 0.697       | <b>0.60</b>  | <b>0.001</b> | <b>0.035</b> | <b>0.244</b>  | -           | <b>0.960</b>  | 0.26         | 0.063        | 0.231        | -0.014        | - | 0.527         |
| <b>entorhinal cortex</b>                 | -0.19       | 0.257   | 0.690       | -0.519 | - | 0.139       | <b>-0.36</b> | <b>0.035</b> | <b>0.408</b> | <b>-0.685</b> | -           | <b>-0.025</b> | -0.17        | 0.169        | 0.324        | -0.401        | - | 0.070         |
| <b>fusiform gyrus</b>                    | 0.01        | 0.936   | 0.936       | -0.326 | - | 0.354       | -0.20        | 0.347        | 0.779        | -0.607        | -           | 0.213         | -0.21        | 0.225        | 0.358        | -0.552        | - | 0.130         |
| <b>inferior parietal cortex</b>          | 0.25        | 0.173   | 0.648       | -0.111 | - | 0.616       | 0.00         | 0.993        | 0.997        | -0.370        | -           | 0.367         | -0.25        | 0.066        | 0.231        | -0.526        | - | 0.017         |
| <b>inferior temporal gyrus</b>           | 0.03        | 0.860   | 0.935       | -0.305 | - | 0.365       | -0.19        | 0.349        | 0.779        | -0.594        | -           | 0.210         | -0.22        | 0.189        | 0.331        | -0.554        | - | 0.109         |
| <b>isthmus cingulate cortex</b>          | 0.33        | 0.071   | 0.601       | -0.028 | - | 0.685       | 0.11         | 0.555        | 0.779        | -0.253        | -           | 0.471         | -0.22        | 0.114        | 0.257        | -0.491        | - | 0.052         |
| <b>lateral occipital cortex</b>          | 0.05        | 0.771   | 0.935       | -0.295 | - | 0.398       | 0.15         | 0.409        | 0.779        | -0.204        | -           | 0.500         | 0.10         | 0.469        | 0.547        | -0.165        | - | 0.358         |
| <b>lateral orbitofrontal cortex</b>      | 0.09        | 0.587   | 0.893       | -0.235 | - | 0.415       | -0.10        | 0.535        | 0.779        | -0.434        | -           | 0.225         | -0.19        | 0.120        | 0.257        | -0.440        | - | 0.051         |
| <b>lingual gyrus</b>                     | 0.16        | 0.352   | 0.725       | -0.171 | - | 0.481       | 0.28         | 0.094        | 0.658        | -0.048        | -           | 0.614         | 0.13         | 0.314        | 0.436        | -0.121        | - | 0.376         |
| <b>medial orbitofrontal cortex</b>       | -0.03       | 0.837   | 0.935       | -0.361 | - | 0.292       | 0.04         | 0.831        | 0.938        | -0.294        | -           | 0.366         | 0.07         | 0.576        | 0.611        | -0.176        | - | 0.316         |
| <b>middle temporal gyrus</b>             | 0.27        | 0.143   | 0.626       | -0.091 | - | 0.627       | -0.17        | 0.356        | 0.779        | -0.535        | -           | 0.193         | <b>-0.44</b> | <b>0.001</b> | <b>0.035</b> | <b>-0.711</b> | - | <b>-0.168</b> |
| <b>parahippocampal gyrus</b>             | -0.20       | 0.276   | 0.690       | -0.561 | - | 0.160       | <b>-0.43</b> | <b>0.020</b> | <b>0.350</b> | <b>-0.799</b> | -           | <b>-0.067</b> | -0.23        | 0.092        | 0.257        | -0.503        | - | 0.038         |
| <b>paracentral lobule</b>                | 0.12        | 0.497   | 0.828       | -0.234 | - | 0.482       | 0.00         | 0.997        | 0.997        | -0.362        | -           | 0.364         | -0.12        | 0.377        | 0.471        | -0.397        | - | 0.150         |
| <b>pars opercularis</b>                  | -0.03       | 0.871   | 0.935       | -0.388 | - | 0.329       | -0.26        | 0.169        | 0.779        | -0.619        | -           | 0.108         | -0.23        | 0.104        | 0.257        | -0.498        | - | 0.047         |
| <b>pars orbitalis</b>                    | 0.31        | 0.083   | 0.601       | -0.041 | - | 0.660       | 0.12         | 0.570        | 0.779        | -0.297        | -           | 0.540         | -0.19        | 0.287        | 0.419        | -0.535        | - | 0.158         |
| <b>pars triangularis</b>                 | -0.02       | 0.908   | 0.935       | -0.366 | - | 0.325       | -0.13        | 0.548        | 0.779        | -0.539        | -           | 0.286         | -0.11        | 0.544        | 0.611        | -0.447        | - | 0.236         |
| <b>pericalcarine cortex</b>              | 0.14        | 0.436   | 0.822       | -0.207 | - | 0.480       | 0.34         | 0.056        | 0.490        | -0.009        | -           | 0.690         | 0.20         | 0.125        | 0.257        | -0.056        | - | 0.464         |
| <b>postcentral gyrus</b>                 | 0.09        | 0.642   | 0.893       | -0.277 | - | 0.449       | -0.10        | 0.577        | 0.779        | -0.472        | -           | 0.263         | -0.19        | 0.176        | 0.324        | -0.466        | - | 0.085         |
| <b>posterior cingulate cortex</b>        | 0.08        | 0.663   | 0.893       | -0.275 | - | 0.432       | -0.06        | 0.760        | 0.895        | -0.415        | -           | 0.303         | -0.13        | 0.324        | 0.436        | -0.402        | - | 0.133         |
| <b>precentral gyrus</b>                  | 0.14        | 0.446   | 0.822       | -0.220 | - | 0.500       | -0.24        | 0.192        | 0.779        | -0.608        | -           | 0.122         | <b>-0.38</b> | <b>0.006</b> | <b>0.061</b> | <b>-0.658</b> | - | <b>-0.108</b> |
| <b>precuneus cortex</b>                  | 0.30        | 0.102   | 0.601       | -0.060 | - | 0.659       | 0.20         | 0.290        | 0.779        | -0.168        | -           | 0.562         | -0.10        | 0.463        | 0.547        | -0.376        | - | 0.171         |
| <b>rostral anterior cingulate cortex</b> | -0.03       | 0.851   | 0.935       | -0.356 | - | 0.294       | -0.17        | 0.307        | 0.779        | -0.500        | -           | 0.157         | -0.14        | 0.259        | 0.394        | -0.383        | - | 0.103         |

|                                     |       |       |       |        |   |       |       |       |       |        |   |       |              |              |              |               |   |               |
|-------------------------------------|-------|-------|-------|--------|---|-------|-------|-------|-------|--------|---|-------|--------------|--------------|--------------|---------------|---|---------------|
| <b>rostral middle frontal gyrus</b> | 0.11  | 0.491 | 0.828 | -0.205 | - | 0.428 | -0.01 | 0.968 | 0.997 | -0.327 | - | 0.314 | -0.12        | 0.336        | 0.436        | -0.358        | - | 0.122         |
| <b>superior frontal gyrus</b>       | 0.17  | 0.307 | 0.696 | -0.159 | - | 0.505 | -0.09 | 0.598 | 0.779 | -0.427 | - | 0.246 | <b>-0.26</b> | <b>0.040</b> | <b>0.175</b> | <b>-0.515</b> | - | <b>-0.012</b> |
| <b>superior parietal cortex</b>     | 0.29  | 0.103 | 0.601 | -0.059 | - | 0.647 | 0.05  | 0.767 | 0.895 | -0.304 | - | 0.413 | -0.24        | 0.082        | 0.257        | -0.510        | - | 0.030         |
| <b>superior temporal gyrus</b>      | 0.09  | 0.623 | 0.893 | -0.255 | - | 0.425 | -0.22 | 0.218 | 0.779 | -0.559 | - | 0.128 | <b>-0.30</b> | <b>0.022</b> | <b>0.128</b> | <b>-0.559</b> | - | <b>-0.043</b> |
| <b>supramarginal gyrus</b>          | 0.29  | 0.121 | 0.605 | -0.076 | - | 0.649 | -0.10 | 0.601 | 0.779 | -0.464 | - | 0.269 | <b>-0.38</b> | <b>0.005</b> | <b>0.061</b> | <b>-0.655</b> | - | <b>-0.114</b> |
| <b>frontal pole</b>                 | -0.34 | 0.054 | 0.601 | -0.688 | - | 0.005 | -0.26 | 0.144 | 0.779 | -0.615 | - | 0.090 | 0.08         | 0.560        | 0.611        | -0.186        | - | 0.344         |
| <b>temporal pole</b>                | -0.20 | 0.242 | 0.690 | -0.534 | - | 0.135 | -0.23 | 0.250 | 0.779 | -0.633 | - | 0.165 | -0.03        | 0.836        | 0.836        | -0.366        | - | 0.296         |
| <b>transverse temporal cortex</b>   | -0.03 | 0.875 | 0.935 | -0.381 | - | 0.324 | 0.02  | 0.897 | 0.981 | -0.334 | - | 0.381 | 0.05         | 0.704        | 0.725        | -0.217        | - | 0.321         |
| <b>insula</b>                       | 0.10  | 0.557 | 0.886 | -0.235 | - | 0.437 | -0.06 | 0.724 | 0.895 | -0.401 | - | 0.279 | -0.16        | 0.206        | 0.343        | -0.413        | - | 0.089         |
| <b>average thickness</b>            | 0.18  | 0.318 | 0.696 | -0.171 | - | 0.526 | -0.10 | 0.576 | 0.779 | -0.455 | - | 0.253 | <b>-0.28</b> | <b>0.040</b> | <b>0.175</b> | <b>-0.544</b> | - | <b>-0.013</b> |

Significant results, corrected for multiple comparisons (FDR P-value  $\leq 0.05$ ), are color-coded red; trend significant results (nominal P-value  $< 0.05$ ) are color-coded orange.

A negative Effect size indicates a thinner cortex of region x in patient group y versus patient group z; a positive Effect size indicates a thicker cortex of region x in patient group y versus patient group z.

**Supplementary Table S28:** mega-analytic results for surface area of each structure comparing medicated pediatric ADHD, ASD and OCD patients, controlling for age, sex, ICV, and scan site.

| ROI                              | ADHD vs OCD |         |             |        |         | ASD vs OCD   |              |              |               |         | ASD vs ADHD  |              |              |               |         |
|----------------------------------|-------------|---------|-------------|--------|---------|--------------|--------------|--------------|---------------|---------|--------------|--------------|--------------|---------------|---------|
|                                  | Effect size | P-value | FDR P-value | 95% CI |         | Effect size  | P-value      | FDR P-value  | 95% CI        |         | Effect size  | P-value      | FDR P-value  | 95% CI        |         |
| banks superior temporal sulcus   | -0.17       | 0.309   | 0.943       | -0.493 | - 0.156 | <b>-0.50</b> | <b>0.003</b> | <b>0.105</b> | <b>-0.834</b> | - 0.174 | <b>-0.34</b> | <b>0.008</b> | <b>0.280</b> | <b>-0.584</b> | - 0.087 |
| caudal anterior cingulate cortex | -0.20       | 0.207   | 0.943       | -0.520 | - 0.113 | -0.19        | 0.247        | 0.912        | -0.512        | - 0.132 | 0.01         | 0.914        | 0.969        | -0.230        | - 0.257 |
| caudal middle frontal gyrus      | -0.11       | 0.504   | 0.943       | -0.429 | - 0.211 | -0.29        | 0.077        | 0.539        | -0.619        | - 0.032 | -0.18        | 0.142        | 0.656        | -0.431        | - 0.062 |
| cuneus cortex                    | 0.14        | 0.419   | 0.943       | -0.193 | - 0.465 | 0.11         | 0.522        | 0.912        | -0.226        | - 0.446 | -0.03        | 0.843        | 0.936        | -0.282        | - 0.230 |
| entorhinal cortex                | 0.05        | 0.773   | 0.943       | -0.313 | - 0.421 | 0.10         | 0.582        | 0.912        | -0.266        | - 0.474 | 0.05         | 0.716        | 0.931        | -0.219        | - 0.319 |
| fusiform gyrus                   | 0.01        | 0.931   | 0.943       | -0.272 | - 0.298 | -0.10        | 0.500        | 0.912        | -0.389        | - 0.190 | -0.11        | 0.314        | 0.718        | -0.330        | - 0.106 |
| inferior parietal cortex         | 0.14        | 0.333   | 0.943       | -0.148 | - 0.438 | -0.09        | 0.549        | 0.912        | -0.388        | - 0.206 | <b>-0.24</b> | <b>0.035</b> | <b>0.408</b> | <b>-0.455</b> | - 0.016 |
| inferior temporal gyrus          | -0.05       | 0.720   | 0.943       | -0.340 | - 0.235 | -0.22        | 0.139        | 0.811        | -0.512        | - 0.072 | -0.17        | 0.131        | 0.656        | -0.385        | - 0.050 |
| isthmus cingulate cortex         | -0.10       | 0.543   | 0.943       | -0.413 | - 0.217 | 0.01         | 0.941        | 0.944        | -0.308        | - 0.332 | 0.11         | 0.372        | 0.766        | -0.132        | - 0.351 |
| lateral occipital cortex         | -0.06       | 0.697   | 0.943       | -0.355 | - 0.237 | 0.11         | 0.486        | 0.912        | -0.194        | - 0.409 | 0.17         | 0.150        | 0.656        | -0.060        | - 0.392 |
| lateral orbitofrontal cortex     | -0.25       | 0.081   | 0.943       | -0.527 | - 0.031 | -0.22        | 0.180        | 0.900        | -0.551        | - 0.103 | 0.02         | 0.856        | 0.936        | -0.243        | - 0.292 |
| lingual gyrus                    | -0.10       | 0.550   | 0.943       | -0.423 | - 0.225 | -0.04        | 0.834        | 0.944        | -0.368        | - 0.297 | 0.06         | 0.619        | 0.931        | -0.187        | - 0.314 |
| medial orbitofrontal cortex      | -0.04       | 0.761   | 0.943       | -0.322 | - 0.236 | -0.09        | 0.592        | 0.912        | -0.430        | - 0.245 | -0.05        | 0.731        | 0.931        | -0.330        | - 0.231 |
| middle temporal gyrus            | -0.10       | 0.495   | 0.943       | -0.374 | - 0.181 | <b>-0.30</b> | <b>0.037</b> | <b>0.324</b> | <b>-0.581</b> | - 0.017 | -0.20        | 0.059        | 0.516        | -0.414        | - 0.008 |
| parahippocampal gyrus            | 0.02        | 0.922   | 0.943       | -0.328 | - 0.362 | 0.06         | 0.730        | 0.944        | -0.290        | - 0.414 | 0.04         | 0.737        | 0.931        | -0.216        | - 0.306 |
| paracentral lobule               | -0.15       | 0.372   | 0.943       | -0.474 | - 0.177 | 0.13         | 0.457        | 0.912        | -0.205        | - 0.456 | <b>0.27</b>  | <b>0.032</b> | <b>0.408</b> | <b>0.023</b>  | - 0.525 |
| pars opercularis                 | 0.04        | 0.825   | 0.943       | -0.295 | - 0.370 | -0.09        | 0.599        | 0.912        | -0.429        | - 0.247 | -0.13        | 0.328        | 0.718        | -0.386        | - 0.129 |
| pars orbitalis                   | -0.10       | 0.511   | 0.943       | -0.401 | - 0.200 | 0.03         | 0.826        | 0.944        | -0.273        | - 0.342 | 0.14         | 0.255        | 0.718        | -0.098        | - 0.368 |
| pars triangularis                | 0.05        | 0.770   | 0.943       | -0.284 | - 0.383 | 0.01         | 0.944        | 0.944        | -0.327        | - 0.351 | -0.04        | 0.777        | 0.931        | -0.296        | - 0.221 |
| pericalcarine cortex             | 0.08        | 0.645   | 0.943       | -0.267 | - 0.431 | 0.04         | 0.840        | 0.944        | -0.319        | - 0.393 | -0.05        | 0.739        | 0.931        | -0.311        | - 0.221 |
| postcentral gyrus                | 0.02        | 0.920   | 0.943       | -0.283 | - 0.314 | -0.04        | 0.792        | 0.944        | -0.343        | - 0.262 | -0.06        | 0.632        | 0.931        | -0.285        | - 0.173 |
| posterior cingulate cortex       | -0.24       | 0.127   | 0.943       | -0.548 | - 0.068 | -0.09        | 0.579        | 0.912        | -0.402        | - 0.225 | 0.15         | 0.205        | 0.718        | -0.083        | - 0.386 |
| precentral gyrus                 | -0.16       | 0.263   | 0.943       | -0.441 | - 0.121 | 0.02         | 0.878        | 0.944        | -0.262        | - 0.307 | 0.18         | 0.096        | 0.656        | -0.033        | - 0.398 |

|                                   |       |       |       |        |   |       |       |       |       |        |   |        |       |       |       |        |   |       |
|-----------------------------------|-------|-------|-------|--------|---|-------|-------|-------|-------|--------|---|--------|-------|-------|-------|--------|---|-------|
| precuneus cortex                  | -0.04 | 0.779 | 0.943 | -0.329 | - | 0.247 | 0.11  | 0.450 | 0.912 | -0.181 | - | 0.407  | 0.15  | 0.170 | 0.661 | -0.066 | - | 0.375 |
| rostral anterior cingulate cortex | -0.24 | 0.097 | 0.943 | -0.521 | - | 0.043 | -0.35 | 0.017 | 0.198 | -0.635 | - | -0.062 | -0.11 | 0.314 | 0.718 | -0.323 | - | 0.104 |
| rostral middle frontal gyrus      | -0.05 | 0.723 | 0.943 | -0.323 | - | 0.224 | -0.05 | 0.778 | 0.944 | -0.376 | - | 0.281  | 0.00  | 0.988 | 0.988 | -0.271 | - | 0.275 |
| superior frontal gyrus            | -0.06 | 0.633 | 0.943 | -0.322 | - | 0.196 | -0.03 | 0.874 | 0.944 | -0.356 | - | 0.303  | 0.04  | 0.798 | 0.931 | -0.243 | - | 0.316 |
| superior parietal cortex          | 0.03  | 0.842 | 0.943 | -0.273 | - | 0.335 | 0.09  | 0.555 | 0.912 | -0.216 | - | 0.402  | 0.06  | 0.601 | 0.931 | -0.170 | - | 0.294 |
| superior temporal gyrus           | -0.24 | 0.098 | 0.943 | -0.517 | - | 0.043 | -0.35 | 0.015 | 0.198 | -0.635 | - | -0.067 | -0.11 | 0.294 | 0.718 | -0.328 | - | 0.099 |
| supramarginal gyrus               | 0.03  | 0.841 | 0.943 | -0.276 | - | 0.339 | -0.02 | 0.908 | 0.944 | -0.330 | - | 0.293  | -0.05 | 0.670 | 0.931 | -0.280 | - | 0.180 |
| frontal pole                      | 0.01  | 0.943 | 0.943 | -0.327 | - | 0.352 | 0.15  | 0.506 | 0.912 | -0.301 | - | 0.609  | 0.14  | 0.483 | 0.916 | -0.254 | - | 0.538 |
| temporal pole                     | -0.02 | 0.893 | 0.943 | -0.361 | - | 0.314 | 0.13  | 0.472 | 0.912 | -0.217 | - | 0.469  | 0.15  | 0.263 | 0.718 | -0.112 | - | 0.410 |
| transverse temporal cortex        | -0.03 | 0.883 | 0.943 | -0.364 | - | 0.313 | -0.02 | 0.925 | 0.944 | -0.362 | - | 0.329  | 0.01  | 0.948 | 0.976 | -0.256 | - | 0.273 |
| insula                            | -0.10 | 0.500 | 0.943 | -0.371 | - | 0.181 | -0.17 | 0.244 | 0.912 | -0.447 | - | 0.114  | -0.07 | 0.497 | 0.916 | -0.277 | - | 0.135 |
| full surface area                 | -0.06 | 0.592 | 0.943 | -0.277 | - | 0.158 | -0.10 | 0.485 | 0.912 | -0.368 | - | 0.174  | -0.04 | 0.750 | 0.931 | -0.265 | - | 0.191 |

Trend significant results (nominal P-value < 0.05) are color-coded orange.

A negative Effect size indicates a smaller surface area of region x in patient group y versus patient group z; a positive Effect size indicates a larger surface area of region x in patient group y versus patient group z.

**Supplementary Table S29:** mega-analytic results for surface area of each structure comparing unmedicated adult ADHD, ASD and OCD patients, controlling for age, sex, ICV, and scan site.

| ROI                              | ADHD vs OCD  |              |              |               |   | ASD vs OCD    |         |             |        |        | ASD vs ADHD |         |             |              |              |              |   |              |
|----------------------------------|--------------|--------------|--------------|---------------|---|---------------|---------|-------------|--------|--------|-------------|---------|-------------|--------------|--------------|--------------|---|--------------|
|                                  | Effect size  | P-value      | FDR P-value  | 95% CI        |   | Effect size   | P-value | FDR P-value | 95% CI |        | Effect size | P-value | FDR P-value | 95% CI       |              |              |   |              |
| banks superior temporal sulcus   | -0.02        | 0.772        | 0.873        | -0.141        | - | 0.105         | -0.01   | 0.918       | 0.918  | -0.182 | -           | 0.164   | 0.01        | 0.924        | 0.951        | -0.177       | - | 0.195        |
| caudal anterior cingulate cortex | -0.02        | 0.711        | 0.873        | -0.148        | - | 0.101         | 0.05    | 0.620       | 0.865  | -0.133 | -           | 0.224   | 0.07        | 0.484        | 0.682        | -0.124       | - | 0.261        |
| caudal middle frontal gyrus      | -0.05        | 0.430        | 0.873        | -0.183        | - | 0.078         | 0.07    | 0.421       | 0.809  | -0.105 | -           | 0.252   | 0.13        | 0.181        | 0.487        | -0.059       | - | 0.310        |
| cuneus cortex                    | 0.05         | 0.490        | 0.873        | -0.089        | - | 0.185         | 0.02    | 0.848       | 0.918  | -0.168 | -           | 0.205   | -0.03       | 0.758        | 0.946        | -0.221       | - | 0.161        |
| entorhinal cortex                | 0.00         | 0.965        | 0.965        | -0.140        | - | 0.134         | -0.02   | 0.853       | 0.918  | -0.207 | -           | 0.171   | -0.01       | 0.888        | 0.946        | -0.219       | - | 0.190        |
| fusiform gyrus                   | -0.04        | 0.436        | 0.873        | -0.158        | - | 0.068         | -0.03   | 0.699       | 0.865  | -0.191 | -           | 0.128   | 0.01        | 0.879        | 0.946        | -0.160       | - | 0.187        |
| inferior parietal cortex         | -0.02        | 0.680        | 0.873        | -0.137        | - | 0.089         | 0.06    | 0.439       | 0.809  | -0.099 | -           | 0.227   | 0.09        | 0.324        | 0.644        | -0.087       | - | 0.264        |
| inferior temporal gyrus          | -0.07        | 0.257        | 0.873        | -0.178        | - | 0.048         | -0.04   | 0.667       | 0.865  | -0.195 | -           | 0.125   | 0.03        | 0.734        | 0.946        | -0.144       | - | 0.204        |
| isthmus cingulate cortex         | -0.05        | 0.413        | 0.873        | -0.162        | - | 0.067         | 0.03    | 0.688       | 0.865  | -0.131 | -           | 0.199   | 0.08        | 0.370        | 0.648        | -0.097       | - | 0.260        |
| lateral occipital cortex         | 0.02         | 0.752        | 0.873        | -0.094        | - | 0.131         | 0.11    | 0.204       | 0.568  | -0.057 | -           | 0.267   | 0.09        | 0.331        | 0.644        | -0.088       | - | 0.262        |
| lateral orbitofrontal cortex     | -0.04        | 0.517        | 0.873        | -0.143        | - | 0.072         | 0.03    | 0.677       | 0.865  | -0.122 | -           | 0.188   | 0.07        | 0.424        | 0.676        | -0.099       | - | 0.236        |
| lingual gyrus                    | -0.01        | 0.841        | 0.884        | -0.138        | - | 0.113         | 0.06    | 0.540       | 0.865  | -0.122 | -           | 0.234   | 0.07        | 0.487        | 0.682        | -0.125       | - | 0.262        |
| medial orbitofrontal cortex      | -0.02        | 0.654        | 0.873        | -0.134        | - | 0.084         | -0.01   | 0.893       | 0.918  | -0.168 | -           | 0.146   | 0.01        | 0.871        | 0.946        | -0.156       | - | 0.184        |
| middle temporal gyrus            | -0.07        | 0.223        | 0.873        | -0.181        | - | 0.042         | -0.05   | 0.557       | 0.865  | -0.203 | -           | 0.109   | 0.02        | 0.795        | 0.946        | -0.147       | - | 0.192        |
| parahippocampal gyrus            | <b>-0.17</b> | <b>0.008</b> | <b>0.280</b> | <b>-0.290</b> | - | <b>-0.043</b> | 0.17    | 0.061       | 0.368  | -0.008 | -           | 0.342   | <b>0.33</b> | <b>0.001</b> | <b>0.035</b> | <b>0.144</b> | - | <b>0.523</b> |
| paracentral lobule               | 0.01         | 0.806        | 0.882        | -0.104        | - | 0.134         | 0.17    | 0.051       | 0.368  | -0.001 | -           | 0.342   | 0.16        | 0.099        | 0.433        | -0.029       | - | 0.341        |
| pars opercularis                 | 0.02         | 0.727        | 0.873        | -0.101        | - | 0.144         | 0.10    | 0.270       | 0.630  | -0.077 | -           | 0.274   | 0.08        | 0.425        | 0.676        | -0.112       | - | 0.266        |
| pars orbitalis                   | -0.08        | 0.171        | 0.873        | -0.194        | - | 0.035         | 0.08    | 0.347       | 0.759  | -0.086 | -           | 0.244   | 0.16        | 0.080        | 0.433        | -0.019       | - | 0.338        |
| pars triangularis                | 0.02         | 0.744        | 0.873        | -0.117        | - | 0.163         | 0.19    | 0.052       | 0.368  | -0.002 | -           | 0.373   | 0.16        | 0.089        | 0.433        | -0.025       | - | 0.350        |
| pericalcarine cortex             | -0.07        | 0.273        | 0.873        | -0.198        | - | 0.056         | 0.05    | 0.562       | 0.865  | -0.129 | -           | 0.238   | 0.13        | 0.216        | 0.540        | -0.073       | - | 0.323        |
| postcentral gyrus                | -0.07        | 0.202        | 0.873        | -0.186        | - | 0.039         | 0.15    | 0.061       | 0.368  | -0.007 | -           | 0.315   | <b>0.23</b> | <b>0.010</b> | <b>0.175</b> | <b>0.054</b> | - | <b>0.402</b> |
| posterior cingulate cortex       | -0.05        | 0.368        | 0.873        | -0.172        | - | 0.064         | 0.03    | 0.703       | 0.865  | -0.137 | -           | 0.203   | 0.09        | 0.352        | 0.648        | -0.096       | - | 0.271        |
| precentral gyrus                 | -0.03        | 0.586        | 0.873        | -0.138        | - | 0.078         | 0.14    | 0.074       | 0.370  | -0.014 | -           | 0.297   | <b>0.17</b> | <b>0.045</b> | <b>0.378</b> | <b>0.004</b> | - | <b>0.339</b> |

|                                   |       |       |       |        |   |       |       |       |       |        |   |       |       |       |       |        |   |       |
|-----------------------------------|-------|-------|-------|--------|---|-------|-------|-------|-------|--------|---|-------|-------|-------|-------|--------|---|-------|
| precuneus cortex                  | -0.03 | 0.568 | 0.873 | -0.142 | - | 0.078 | -0.01 | 0.886 | 0.918 | -0.170 | - | 0.147 | 0.02  | 0.815 | 0.946 | -0.151 | - | 0.192 |
| rostral anterior cingulate cortex | 0.01  | 0.859 | 0.884 | -0.107 | - | 0.129 | 0.08  | 0.376 | 0.774 | -0.093 | - | 0.246 | 0.07  | 0.480 | 0.682 | -0.117 | - | 0.249 |
| rostral middle frontal gyrus      | -0.10 | 0.065 | 0.873 | -0.206 | - | 0.006 | 0.02  | 0.783 | 0.914 | -0.131 | - | 0.175 | 0.12  | 0.150 | 0.446 | -0.044 | - | 0.287 |
| superior frontal gyrus            | -0.02 | 0.700 | 0.873 | -0.132 | - | 0.089 | 0.09  | 0.227 | 0.568 | -0.059 | - | 0.247 | 0.12  | 0.153 | 0.446 | -0.043 | - | 0.275 |
| superior parietal cortex          | 0.02  | 0.773 | 0.873 | -0.109 | - | 0.147 | 0.12  | 0.166 | 0.568 | -0.051 | - | 0.299 | 0.10  | 0.251 | 0.586 | -0.074 | - | 0.284 |
| superior temporal gyrus           | 0.02  | 0.763 | 0.873 | -0.096 | - | 0.131 | 0.15  | 0.063 | 0.368 | -0.008 | - | 0.307 | 0.13  | 0.128 | 0.446 | -0.038 | - | 0.303 |
| supramarginal gyrus               | 0.04  | 0.527 | 0.873 | -0.078 | - | 0.152 | 0.13  | 0.112 | 0.490 | -0.031 | - | 0.296 | 0.10  | 0.285 | 0.623 | -0.080 | - | 0.270 |
| frontal pole                      | 0.03  | 0.607 | 0.873 | -0.094 | - | 0.161 | 0.03  | 0.717 | 0.865 | -0.150 | - | 0.219 | 0.00  | 0.996 | 0.996 | -0.199 | - | 0.200 |
| temporal pole                     | -0.10 | 0.129 | 0.873 | -0.231 | - | 0.029 | -0.11 | 0.221 | 0.568 | -0.298 | - | 0.069 | -0.01 | 0.892 | 0.946 | -0.212 | - | 0.184 |
| transverse temporal cortex        | 0.03  | 0.680 | 0.873 | -0.101 | - | 0.155 | 0.24  | 0.010 | 0.350 | 0.057  | - | 0.417 | 0.21  | 0.035 | 0.378 | 0.015  | - | 0.405 |
| insula                            | -0.06 | 0.243 | 0.873 | -0.171 | - | 0.043 | 0.10  | 0.204 | 0.568 | -0.054 | - | 0.253 | 0.16  | 0.054 | 0.378 | -0.003 | - | 0.329 |
| full surface area                 | -0.02 | 0.666 | 0.873 | -0.125 | - | 0.080 | 0.09  | 0.214 | 0.568 | -0.052 | - | 0.231 | 0.11  | 0.132 | 0.446 | -0.034 | - | 0.258 |

Significant results, corrected for multiple comparisons (FDR P-value  $\leq 0.05$ ), are color-coded red; trend significant results (nominal P-value  $< 0.05$ ) are color-coded orange.

A negative Effect size indicates a smaller surface area of region x in patient group y versus patient group z; a positive Effect size indicates a larger surface area of region x in patient group y versus patient group z.

**Supplementary Table S30:** mega-analytic results for each subcortical structure comparing unmedicated adult ADHD, ASD and OCD patients, controlling for age, sex, ICV, and scan site.

| ROI                | ADHD vs OCD  |              |              |               |   | ASD vs OCD    |         |             |        |        | ASD vs ADHD |         |             |        |       |        |   |       |
|--------------------|--------------|--------------|--------------|---------------|---|---------------|---------|-------------|--------|--------|-------------|---------|-------------|--------|-------|--------|---|-------|
|                    | Effect size  | P-value      | FDR P-value  | 95% CI        |   | Effect size   | P-value | FDR P-value | 95% CI |        | Effect size | P-value | FDR P-value | 95% CI |       |        |   |       |
| <b>thalamus</b>    | 0.05         | 0.423        | 0.564        | -0.077        | - | 0.184         | -0.02   | 0.810       | 0.959  | -0.153 | -           | 0.120   | -0.07       | 0.426  | 0.712 | -0.243 | - | 0.102 |
| <b>caudate</b>     | 0.03         | 0.563        | 0.611        | -0.081        | - | 0.148         | 0.20    | 0.110       | 0.508  | -0.045 | -           | 0.442   | 0.16        | 0.202  | 0.712 | -0.089 | - | 0.418 |
| <b>putamen</b>     | -0.06        | 0.059        | 0.157        | -0.121        | - | 0.002         | -0.05   | 0.335       | 0.893  | -0.142 | -           | 0.048   | 0.01        | 0.801  | 0.915 | -0.084 | - | 0.109 |
| <b>pallidum</b>    | <b>-0.08</b> | <b>0.042</b> | <b>0.157</b> | <b>-0.152</b> | - | <b>-0.003</b> | -0.07   | 0.127       | 0.508  | -0.167 | -           | 0.021   | 0.00        | 0.921  | 0.921 | -0.083 | - | 0.092 |
| <b>hippocampus</b> | 0.11         | 0.050        | 0.157        | 0.000         | - | 0.219         | -0.01   | 0.897       | 0.959  | -0.166 | -           | 0.145   | -0.12       | 0.167  | 0.712 | -0.289 | - | 0.050 |
| <b>amygdala</b>    | 0.09         | 0.119        | 0.238        | -0.023        | - | 0.198         | 0.04    | 0.650       | 0.959  | -0.121 | -           | 0.193   | -0.05       | 0.558  | 0.744 | -0.222 | - | 0.120 |
| <b>accumbens</b>   | -0.03        | 0.611        | 0.611        | -0.128        | - | 0.075         | 0.05    | 0.501       | 0.959  | -0.095 | -           | 0.195   | 0.08        | 0.347  | 0.712 | -0.082 | - | 0.235 |
| <b>ICV</b>         | -0.06        | 0.260        | 0.416        | -0.165        | - | 0.045         | 0.00    | 0.959       | 0.959  | -0.148 | -           | 0.156   | 0.06        | 0.445  | 0.712 | -0.101 | - | 0.229 |

Trend significant results (nominal P-value < 0.05) are color-coded orange.

A negative Effect size indicates a smaller volume of region x in patient group y versus patient group z; a positive Effect size indicates a larger volume of region x in patient group y versus patient group z.

**Supplementary Table S31:** mega-analytic results for cortical thickness of each structure comparing unmedicated adult ADHD, ASD and OCD patients, controlling for age, sex and scan site.

| ROI                              | ADHD vs OCD  |              |              |               |   | ASD vs OCD    |             |              |              |              | ASD vs ADHD |              |              |              |              |               |   |               |
|----------------------------------|--------------|--------------|--------------|---------------|---|---------------|-------------|--------------|--------------|--------------|-------------|--------------|--------------|--------------|--------------|---------------|---|---------------|
|                                  | Effect size  | P-value      | FDR P-value  | 95% CI        |   | Effect size   | P-value     | FDR P-value  | 95% CI       |              | Effect size | P-value      | FDR P-value  | 95% CI       |              |               |   |               |
| banks superior temporal sulcus   | 0.06         | 0.385        | 0.825        | -0.075        | - | 0.194         | 0.06        | 0.506        | 0.681        | -0.118       | -           | 0.239        | 0.00         | 0.991        | 0.991        | -0.179        | - | 0.181         |
| caudal anterior cingulate cortex | <b>-0.14</b> | <b>0.026</b> | <b>0.397</b> | <b>-0.254</b> | - | <b>-0.017</b> | -0.13       | 0.133        | 0.466        | -0.302       | -           | 0.040        | 0.00         | 0.965        | 0.991        | -0.181        | - | 0.189         |
| caudal middle frontal gyrus      | -0.06        | 0.289        | 0.825        | -0.168        | - | 0.050         | -0.09       | 0.525        | 0.681        | -0.375       | -           | 0.191        | -0.03        | 0.824        | 0.980        | -0.323        | - | 0.257         |
| cuneus cortex                    | 0.00         | 0.975        | 0.975        | -0.113        | - | 0.117         | <b>0.25</b> | <b>0.003</b> | <b>0.105</b> | <b>0.082</b> | -           | <b>0.414</b> | <b>0.25</b>  | <b>0.007</b> | <b>0.123</b> | <b>0.067</b>  | - | <b>0.426</b>  |
| entorhinal cortex                | -0.05        | 0.466        | 0.825        | -0.177        | - | 0.081         | -0.21       | 0.213        | 0.504        | -0.533       | -           | 0.119        | -0.16        | 0.352        | 0.778        | -0.494        | - | 0.176         |
| fusiform gyrus                   | 0.00         | 0.975        | 0.975        | -0.122        | - | 0.125         | -0.06       | 0.484        | 0.678        | -0.223       | -           | 0.106        | -0.06        | 0.477        | 0.798        | -0.228        | - | 0.106         |
| inferior parietal cortex         | <b>0.13</b>  | <b>0.034</b> | <b>0.397</b> | <b>0.010</b>  | - | <b>0.249</b>  | 0.11        | 0.192        | 0.504        | -0.055       | -           | 0.275        | -0.02        | 0.822        | 0.980        | -0.191        | - | 0.151         |
| inferior temporal gyrus          | 0.04         | 0.496        | 0.825        | -0.077        | - | 0.159         | -0.06       | 0.464        | 0.678        | -0.230       | -           | 0.105        | -0.10        | 0.266        | 0.724        | -0.286        | - | 0.079         |
| isthmus cingulate cortex         | 0.00         | 0.941        | 0.975        | -0.128        | - | 0.119         | 0.02        | 0.790        | 0.847        | -0.154       | -           | 0.203        | 0.03         | 0.769        | 0.980        | -0.165        | - | 0.222         |
| lateral occipital cortex         | <b>0.16</b>  | <b>0.007</b> | <b>0.245</b> | <b>0.042</b>  | - | <b>0.275</b>  | <b>0.18</b> | <b>0.041</b> | <b>0.220</b> | <b>0.007</b> | -           | <b>0.343</b> | 0.02         | 0.859        | 0.980        | -0.165        | - | 0.198         |
| lateral orbitofrontal cortex     | -0.04        | 0.475        | 0.825        | -0.151        | - | 0.070         | -0.01       | 0.880        | 0.906        | -0.173       | -           | 0.148        | 0.03         | 0.753        | 0.980        | -0.146        | - | 0.201         |
| lingual gyrus                    | 0.01         | 0.902        | 0.975        | -0.109        | - | 0.124         | <b>0.18</b> | <b>0.035</b> | <b>0.220</b> | <b>0.013</b> | -           | <b>0.344</b> | 0.17         | 0.064        | 0.448        | -0.010        | - | 0.352         |
| medial orbitofrontal cortex      | -0.01        | 0.818        | 0.975        | -0.127        | - | 0.101         | 0.11        | 0.192        | 0.504        | -0.055       | -           | 0.274        | 0.12         | 0.176        | 0.704        | -0.055        | - | 0.301         |
| middle temporal gyrus            | 0.05         | 0.408        | 0.825        | -0.074        | - | 0.182         | 0.06        | 0.472        | 0.678        | -0.108       | -           | 0.233        | 0.01         | 0.924        | 0.980        | -0.166        | - | 0.183         |
| parahippocampal gyrus            | 0.07         | 0.267        | 0.825        | -0.054        | - | 0.197         | -0.17       | 0.060        | 0.263        | -0.349       | -           | 0.007        | <b>-0.24</b> | <b>0.015</b> | <b>0.175</b> | <b>-0.436</b> | - | <b>-0.048</b> |
| paracentral lobule               | -0.08        | 0.139        | 0.770        | -0.190        | - | 0.026         | -0.02       | 0.799        | 0.847        | -0.177       | -           | 0.137        | 0.06         | 0.479        | 0.798        | -0.109        | - | 0.232         |
| pars opercularis                 | -0.03        | 0.529        | 0.825        | -0.144        | - | 0.074         | 0.01        | 0.935        | 0.935        | -0.293       | -           | 0.319        | 0.05         | 0.765        | 0.980        | -0.265        | - | 0.360         |
| pars orbitalis                   | -0.01        | 0.814        | 0.975        | -0.138        | - | 0.109         | 0.11        | 0.245        | 0.504        | -0.072       | -           | 0.284        | 0.12         | 0.221        | 0.724        | -0.072        | - | 0.313         |
| pars triangularis                | -0.03        | 0.542        | 0.825        | -0.147        | - | 0.077         | <b>0.21</b> | <b>0.011</b> | <b>0.193</b> | <b>0.048</b> | -           | <b>0.372</b> | <b>0.24</b>  | <b>0.006</b> | <b>0.123</b> | <b>0.070</b>  | - | <b>0.420</b>  |
| pericalcarine cortex             | -0.01        | 0.782        | 0.975        | -0.117        | - | 0.088         | 0.08        | 0.314        | 0.595        | -0.072       | -           | 0.225        | 0.09         | 0.269        | 0.724        | -0.070        | - | 0.252         |
| postcentral gyrus                | -0.01        | 0.889        | 0.975        | -0.118        | - | 0.102         | 0.08        | 0.344        | 0.602        | -0.082       | -           | 0.235        | 0.08         | 0.336        | 0.778        | -0.087        | - | 0.256         |
| posterior cingulate cortex       | -0.04        | 0.512        | 0.825        | -0.145        | - | 0.072         | <b>0.16</b> | <b>0.044</b> | <b>0.220</b> | <b>0.005</b> | -           | <b>0.319</b> | <b>0.20</b>  | <b>0.023</b> | <b>0.201</b> | <b>0.028</b>  | - | <b>0.369</b>  |
| precentral gyrus                 | -0.05        | 0.453        | 0.825        | -0.166        | - | 0.074         | -0.07       | 0.661        | 0.771        | -0.371       | -           | 0.235        | -0.02        | 0.887        | 0.980        | -0.325        | - | 0.281         |

|                                   |       |       |       |        |   |       |       |       |       |        |   |        |       |       |       |        |   |       |
|-----------------------------------|-------|-------|-------|--------|---|-------|-------|-------|-------|--------|---|--------|-------|-------|-------|--------|---|-------|
| precuneus cortex                  | 0.07  | 0.209 | 0.813 | -0.041 | - | 0.186 | 0.08  | 0.323 | 0.595 | -0.081 | - | 0.247  | 0.01  | 0.911 | 0.980 | -0.168 | - | 0.188 |
| rostral anterior cingulate cortex | -0.09 | 0.114 | 0.770 | -0.203 | - | 0.022 | -0.07 | 0.419 | 0.667 | -0.229 | - | 0.095  | 0.02  | 0.793 | 0.980 | -0.152 | - | 0.199 |
| rostral middle frontal gyrus      | 0.03  | 0.629 | 0.897 | -0.082 | - | 0.136 | 0.17  | 0.039 | 0.220 | 0.008  | - | 0.324  | 0.14  | 0.110 | 0.610 | -0.032 | - | 0.310 |
| superior frontal gyrus            | -0.08 | 0.161 | 0.770 | -0.191 | - | 0.032 | 0.02  | 0.785 | 0.847 | -0.138 | - | 0.182  | 0.10  | 0.249 | 0.724 | -0.071 | - | 0.274 |
| superior parietal cortex          | 0.08  | 0.176 | 0.770 | -0.034 | - | 0.187 | 0.09  | 0.244 | 0.504 | -0.065 | - | 0.255  | 0.02  | 0.832 | 0.980 | -0.154 | - | 0.191 |
| superior temporal gyrus           | -0.03 | 0.665 | 0.897 | -0.144 | - | 0.092 | 0.04  | 0.621 | 0.749 | -0.123 | - | 0.206  | 0.07  | 0.458 | 0.798 | -0.111 | - | 0.246 |
| supramarginal gyrus               | 0.04  | 0.529 | 0.825 | -0.077 | - | 0.149 | 0.12  | 0.160 | 0.504 | -0.046 | - | 0.277  | 0.08  | 0.369 | 0.778 | -0.094 | - | 0.252 |
| frontal pole                      | 0.03  | 0.666 | 0.897 | -0.098 | - | 0.154 | 0.16  | 0.081 | 0.315 | -0.020 | - | 0.343  | 0.13  | 0.181 | 0.704 | -0.062 | - | 0.330 |
| temporal pole                     | -0.11 | 0.093 | 0.770 | -0.241 | - | 0.018 | -0.19 | 0.043 | 0.220 | -0.378 | - | -0.006 | -0.08 | 0.436 | 0.798 | -0.282 | - | 0.122 |
| transverse temporal cortex        | -0.04 | 0.515 | 0.825 | -0.165 | - | 0.083 | 0.11  | 0.219 | 0.504 | -0.066 | - | 0.286  | 0.15  | 0.122 | 0.610 | -0.040 | - | 0.343 |
| insula                            | -0.06 | 0.272 | 0.825 | -0.180 | - | 0.051 | -0.04 | 0.600 | 0.749 | -0.210 | - | 0.121  | 0.02  | 0.823 | 0.980 | -0.159 | - | 0.200 |
| average thickness                 | -0.01 | 0.922 | 0.975 | -0.110 | - | 0.100 | 0.07  | 0.375 | 0.625 | -0.083 | - | 0.221  | 0.07  | 0.378 | 0.778 | -0.091 | - | 0.239 |

Trend significant results (nominal P-value < 0.05) are color-coded orange.

A negative Effect size indicates a thinner cortex of region x in patient group y versus patient group z; a positive Effect size indicates a thicker cortex of region x in patient group y versus patient group z.

**Supplementary Table S32:** mega-analytic results for each subcortical structure comparing unmedicated adolescent ADHD, ASD and OCD patients, controlling for age, sex, ICV, and scan site.

| ROI                | ADHD vs OCD |         |             |        |   | ASD vs OCD  |         |             |        |        | ASD vs ADHD |         |             |        |       |        |   |       |
|--------------------|-------------|---------|-------------|--------|---|-------------|---------|-------------|--------|--------|-------------|---------|-------------|--------|-------|--------|---|-------|
|                    | Effect size | P-value | FDR P-value | 95% CI |   | Effect size | P-value | FDR P-value | 95% CI |        | Effect size | P-value | FDR P-value | 95% CI |       |        |   |       |
| <b>thalamus</b>    | -0.12       | 0.207   | 0.414       | -0.295 | - | 0.064       | -0.10   | 0.300       | 0.996  | -0.284 | -           | 0.087   | 0.02        | 0.853  | 0.853 | -0.167 | - | 0.202 |
| <b>caudate</b>     | -0.11       | 0.333   | 0.434       | -0.322 | - | 0.109       | 0.02    | 0.892       | 0.996  | -0.208 | -           | 0.238   | 0.12        | 0.285  | 0.759 | -0.102 | - | 0.346 |
| <b>putamen</b>     | -0.11       | 0.310   | 0.434       | -0.314 | - | 0.100       | 0.00    | 0.996       | 0.996  | -0.216 | -           | 0.217   | 0.11        | 0.321  | 0.759 | -0.105 | - | 0.321 |
| <b>pallidum</b>    | -0.05       | 0.654   | 0.654       | -0.256 | - | 0.160       | 0.02    | 0.838       | 0.996  | -0.195 | -           | 0.241   | 0.07        | 0.510  | 0.759 | -0.139 | - | 0.280 |
| <b>hippocampus</b> | -0.14       | 0.155   | 0.414       | -0.329 | - | 0.053       | -0.03   | 0.794       | 0.996  | -0.228 | -           | 0.175   | 0.11        | 0.273  | 0.759 | -0.088 | - | 0.311 |
| <b>amygdala</b>    | -0.15       | 0.159   | 0.414       | -0.349 | - | 0.057       | -0.08   | 0.489       | 0.996  | -0.288 | -           | 0.138   | 0.07        | 0.506  | 0.759 | -0.138 | - | 0.280 |
| <b>accumbens</b>   | -0.09       | 0.380   | 0.434       | -0.299 | - | 0.114       | -0.05   | 0.677       | 0.996  | -0.261 | -           | 0.170   | 0.05        | 0.670  | 0.766 | -0.168 | - | 0.261 |
| <b>ICV</b>         | -0.15       | 0.144   | 0.414       | -0.342 | - | 0.050       | -0.09   | 0.448       | 0.996  | -0.308 | -           | 0.136   | 0.06        | 0.569  | 0.759 | -0.147 | - | 0.268 |

A negative Effect size indicates a smaller volume of region x in patient group y versus patient group z; a positive Effect size indicates a larger volume of region x in patient group y versus patient group z.

**Supplementary Table S33:** mega-analytic results for cortical thickness of each structure comparing unmedicated adolescent ADHD, ASD and OCD patients, controlling for age, sex and scan site.

| ROI                               | ADHD vs OCD |              |              |                      | ASD vs OCD  |              |              |                      | ASD vs ADHD |         |             |                |
|-----------------------------------|-------------|--------------|--------------|----------------------|-------------|--------------|--------------|----------------------|-------------|---------|-------------|----------------|
|                                   | Effect size | P-value      | FDR P-value  | 95% CI               | Effect size | P-value      | FDR P-value  | 95% CI               | Effect size | P-value | FDR P-value | 95% CI         |
| banks superior temporal sulcus    | 0.19        | 0.104        | 0.331        | -0.038 - 0.412       | 0.11        | 0.377        | 0.891        | -0.136 - 0.359       | -0.08       | 0.519   | 0.898       | -0.304 - 0.154 |
| caudal anterior cingulate cortex  | -0.11       | 0.289        | 0.618        | -0.327 - 0.098       | -0.21       | 0.091        | 0.531        | -0.444 - 0.033       | -0.09       | 0.419   | 0.898       | -0.312 - 0.130 |
| caudal middle frontal gyrus       | 0.07        | 0.523        | 0.832        | -0.140 - 0.275       | -0.09       | 0.433        | 0.891        | -0.325 - 0.139       | -0.16       | 0.145   | 0.671       | -0.376 - 0.055 |
| cuneus cortex                     | 0.15        | 0.191        | 0.514        | -0.073 - 0.364       | 0.12        | 0.334        | 0.891        | -0.124 - 0.366       | -0.02       | 0.831   | 0.985       | -0.253 - 0.203 |
| entorhinal cortex                 | -0.08       | 0.465        | 0.778        | -0.306 - 0.140       | -0.13       | 0.302        | 0.881        | -0.376 - 0.116       | -0.05       | 0.679   | 0.951       | -0.268 - 0.175 |
| fusiform gyrus                    | 0.03        | 0.764        | 0.906        | -0.171 - 0.233       | 0.06        | 0.621        | 0.993        | -0.169 - 0.283       | 0.03        | 0.808   | 0.985       | -0.184 - 0.237 |
| inferior parietal cortex          | <b>0.23</b> | <b>0.024</b> | <b>0.210</b> | <b>0.031 - 0.436</b> | <b>0.27</b> | <b>0.020</b> | <b>0.350</b> | <b>0.043 - 0.495</b> | 0.04        | 0.739   | 0.985       | -0.173 - 0.244 |
| inferior temporal gyrus           | <b>0.24</b> | <b>0.023</b> | <b>0.210</b> | <b>0.033 - 0.444</b> | 0.16        | 0.161        | 0.626        | -0.065 - 0.394       | -0.07       | 0.497   | 0.898       | -0.288 - 0.140 |
| isthmus cingulate cortex          | 0.11        | 0.300        | 0.618        | -0.101 - 0.330       | 0.18        | 0.146        | 0.626        | -0.062 - 0.421       | 0.07        | 0.570   | 0.898       | -0.160 - 0.291 |
| lateral occipital cortex          | 0.18        | 0.079        | 0.294        | -0.020 - 0.379       | <b>0.28</b> | <b>0.016</b> | <b>0.350</b> | <b>0.052 - 0.499</b> | 0.10        | 0.362   | 0.898       | -0.111 - 0.304 |
| lateral orbitofrontal cortex      | -0.01       | 0.897        | 0.917        | -0.224 - 0.196       | -0.01       | 0.916        | 0.993        | -0.248 - 0.223       | 0.00        | 0.991   | 0.991       | -0.219 - 0.221 |
| lingual gyrus                     | -0.03       | 0.796        | 0.906        | -0.240 - 0.184       | 0.14        | 0.245        | 0.783        | -0.097 - 0.380       | 0.17        | 0.134   | 0.671       | -0.052 - 0.391 |
| medial orbitofrontal cortex       | 0.04        | 0.702        | 0.906        | -0.173 - 0.257       | 0.05        | 0.693        | 0.993        | -0.193 - 0.290       | 0.01        | 0.955   | 0.991       | -0.217 - 0.230 |
| middle temporal gyrus             | 0.08        | 0.467        | 0.778        | -0.134 - 0.292       | 0.00        | 0.993        | 0.993        | -0.236 - 0.234       | -0.08       | 0.473   | 0.898       | -0.299 - 0.139 |
| parahippocampal gyrus             | -0.09       | 0.428        | 0.778        | -0.315 - 0.134       | -0.02       | 0.863        | 0.993        | -0.274 - 0.230       | 0.07        | 0.564   | 0.898       | -0.165 - 0.302 |
| paracentral lobule                | 0.02        | 0.868        | 0.917        | -0.244 - 0.289       | -0.07       | 0.637        | 0.993        | -0.356 - 0.218       | -0.09       | 0.417   | 0.898       | -0.313 - 0.129 |
| pars opercularis                  | 0.10        | 0.373        | 0.725        | -0.118 - 0.316       | -0.08       | 0.513        | 0.993        | -0.325 - 0.162       | -0.18       | 0.118   | 0.671       | -0.406 - 0.046 |
| pars orbitalis                    | <b>0.27</b> | <b>0.017</b> | <b>0.210</b> | <b>0.048 - 0.494</b> | 0.22        | 0.086        | 0.531        | -0.031 - 0.469       | -0.05       | 0.660   | 0.951       | -0.284 - 0.180 |
| pars triangularis                 | 0.21        | 0.056        | 0.280        | -0.005 - 0.421       | 0.02        | 0.858        | 0.993        | -0.218 - 0.261       | -0.19       | 0.102   | 0.671       | -0.409 - 0.037 |
| pericalcarine cortex              | 0.03        | 0.767        | 0.906        | -0.182 - 0.246       | 0.18        | 0.136        | 0.626        | -0.057 - 0.421       | 0.15        | 0.188   | 0.671       | -0.073 - 0.373 |
| postcentral gyrus                 | 0.04        | 0.689        | 0.906        | -0.174 - 0.263       | 0.04        | 0.730        | 0.993        | -0.200 - 0.286       | 0.00        | 0.988   | 0.991       | -0.226 - 0.222 |
| posterior cingulate cortex        | <b>0.25</b> | <b>0.024</b> | <b>0.210</b> | <b>0.032 - 0.458</b> | 0.14        | 0.246        | 0.783        | -0.097 - 0.380       | -0.10       | 0.358   | 0.898       | -0.326 - 0.118 |
| precentral gyrus                  | 0.04        | 0.721        | 0.906        | -0.179 - 0.259       | -0.02       | 0.856        | 0.993        | -0.267 - 0.222       | -0.06       | 0.590   | 0.898       | -0.289 - 0.164 |
| precuneus cortex                  | 0.02        | 0.812        | 0.906        | -0.181 - 0.230       | 0.00        | 0.977        | 0.993        | -0.227 - 0.234       | -0.02       | 0.844   | 0.985       | -0.236 - 0.193 |
| rostral anterior cingulate cortex | -0.06       | 0.564        | 0.858        | -0.271 - 0.148       | -0.21       | 0.078        | 0.531        | -0.444 - 0.024       | -0.15       | 0.179   | 0.671       | -0.366 - 0.068 |

|                              |       |       |       |        |   |       |       |       |       |        |   |       |       |       |       |        |   |        |
|------------------------------|-------|-------|-------|--------|---|-------|-------|-------|-------|--------|---|-------|-------|-------|-------|--------|---|--------|
| rostral middle frontal gyrus | 0.22  | 0.040 | 0.280 | 0.010  | - | 0.424 | 0.04  | 0.727 | 0.993 | -0.190 | - | 0.273 | -0.18 | 0.110 | 0.671 | -0.392 | - | 0.040  |
| superior frontal gyrus       | 0.21  | 0.054 | 0.280 | -0.003 | - | 0.417 | -0.03 | 0.809 | 0.993 | -0.264 | - | 0.206 | -0.24 | 0.033 | 0.671 | -0.453 | - | -0.019 |
| superior parietal cortex     | 0.18  | 0.078 | 0.294 | -0.020 | - | 0.386 | 0.21  | 0.065 | 0.531 | -0.013 | - | 0.440 | 0.03  | 0.775 | 0.985 | -0.180 | - | 0.241  |
| superior temporal gyrus      | 0.03  | 0.775 | 0.906 | -0.187 | - | 0.251 | 0.04  | 0.753 | 0.993 | -0.202 | - | 0.279 | 0.01  | 0.953 | 0.991 | -0.218 | - | 0.231  |
| supramarginal gyrus          | 0.12  | 0.268 | 0.618 | -0.092 | - | 0.330 | -0.04 | 0.715 | 0.993 | -0.278 | - | 0.191 | -0.16 | 0.138 | 0.671 | -0.377 | - | 0.052  |
| frontal pole                 | 0.16  | 0.153 | 0.446 | -0.061 | - | 0.388 | 0.01  | 0.929 | 0.993 | -0.240 | - | 0.263 | -0.15 | 0.202 | 0.671 | -0.386 | - | 0.082  |
| temporal pole                | -0.12 | 0.288 | 0.618 | -0.333 | - | 0.099 | 0.03  | 0.832 | 0.993 | -0.215 | - | 0.267 | 0.14  | 0.211 | 0.671 | -0.081 | - | 0.368  |
| transverse temporal cortex   | -0.01 | 0.917 | 0.917 | -0.228 | - | 0.205 | 0.10  | 0.430 | 0.891 | -0.145 | - | 0.340 | 0.11  | 0.345 | 0.898 | -0.117 | - | 0.335  |
| insula                       | -0.02 | 0.828 | 0.906 | -0.216 | - | 0.173 | -0.01 | 0.939 | 0.993 | -0.227 | - | 0.210 | 0.01  | 0.899 | 0.991 | -0.190 | - | 0.216  |
| average thickness            | 0.18  | 0.084 | 0.294 | -0.025 | - | 0.389 | 0.10  | 0.392 | 0.891 | -0.131 | - | 0.333 | -0.08 | 0.464 | 0.898 | -0.298 | - | 0.136  |

Trend significant results (nominal P-value < 0.05) are color-coded orange.

A negative Effect size indicates a thinner cortex of region x in patient group y versus patient group z; a positive Effect size indicates a thicker cortex of region x in patient group y versus patient group z.

**Supplementary Table S34:** mega-analytic results for surface area of each structure comparing unmedicated adolescent ADHD, ASD and OCD patients, controlling for age, sex, ICV, and scan site.

| ROI                              | ADHD vs OCD  |              |              |               |   | ASD vs OCD    |              |              |              |               | ASD vs ADHD |               |             |        |       |        |   |       |
|----------------------------------|--------------|--------------|--------------|---------------|---|---------------|--------------|--------------|--------------|---------------|-------------|---------------|-------------|--------|-------|--------|---|-------|
|                                  | Effect size  | P-value      | FDR P-value  | 95% CI        |   | Effect size   | P-value      | FDR P-value  | 95% CI       |               | Effect size | P-value       | FDR P-value | 95% CI |       |        |   |       |
| banks superior temporal sulcus   | -0.03        | 0.799        | 0.883        | -0.228        | - | 0.176         | -0.03        | 0.792        | 0.886        | -0.255        | -           | 0.194         | 0.00        | 0.970  | 0.993 | -0.210 | - | 0.202 |
| caudal anterior cingulate cortex | -0.07        | 0.499        | 0.832        | -0.270        | - | 0.131         | 0.03         | 0.810        | 0.886        | -0.200        | -           | 0.255         | 0.10        | 0.363  | 0.977 | -0.112 | - | 0.306 |
| caudal middle frontal gyrus      | <b>-0.20</b> | <b>0.044</b> | <b>0.206</b> | <b>-0.392</b> | - | <b>-0.006</b> | -0.17        | 0.132        | 0.660        | -0.384        | -           | 0.050         | 0.03        | 0.754  | 0.993 | -0.168 | - | 0.233 |
| cuneus cortex                    | <b>-0.22</b> | <b>0.034</b> | <b>0.206</b> | <b>-0.418</b> | - | <b>-0.017</b> | -0.12        | 0.312        | 0.780        | -0.344        | -           | 0.110         | 0.10        | 0.351  | 0.977 | -0.110 | - | 0.311 |
| entorhinal cortex                | -0.04        | 0.718        | 0.868        | -0.260        | - | 0.179         | 0.09         | 0.453        | 0.840        | -0.150        | -           | 0.337         | 0.13        | 0.229  | 0.977 | -0.084 | - | 0.351 |
| fusiform gyrus                   | -0.07        | 0.421        | 0.776        | -0.253        | - | 0.106         | 0.03         | 0.775        | 0.886        | -0.172        | -           | 0.231         | 0.10        | 0.281  | 0.977 | -0.084 | - | 0.290 |
| inferior parietal cortex         | 0.03         | 0.761        | 0.883        | -0.156        | - | 0.214         | 0.01         | 0.909        | 0.964        | -0.196        | -           | 0.220         | -0.02       | 0.864  | 0.993 | -0.207 | - | 0.174 |
| inferior temporal gyrus          | -0.11        | 0.234        | 0.540        | -0.287        | - | 0.070         | -0.11        | 0.299        | 0.780        | -0.306        | -           | 0.094         | 0.00        | 0.981  | 0.993 | -0.184 | - | 0.189 |
| isthmus cingulate cortex         | <b>-0.20</b> | <b>0.044</b> | <b>0.206</b> | <b>-0.392</b> | - | <b>-0.005</b> | -0.20        | 0.067        | 0.469        | -0.423        | -           | 0.015         | -0.01       | 0.956  | 0.993 | -0.209 | - | 0.198 |
| lateral occipital cortex         | <b>-0.19</b> | <b>0.039</b> | <b>0.206</b> | <b>-0.375</b> | - | <b>-0.010</b> | -0.19        | 0.067        | 0.469        | -0.396        | -           | 0.014         | 0.00        | 0.993  | 0.993 | -0.189 | - | 0.191 |
| lateral orbitofrontal cortex     | 0.05         | 0.611        | 0.868        | -0.129        | - | 0.219         | -0.10        | 0.339        | 0.791        | -0.291        | -           | 0.100         | -0.14       | 0.132  | 0.977 | -0.323 | - | 0.042 |
| lingual gyrus                    | -0.08        | 0.420        | 0.776        | -0.289        | - | 0.120         | -0.03        | 0.804        | 0.886        | -0.260        | -           | 0.202         | 0.05        | 0.614  | 0.993 | -0.158 | - | 0.268 |
| medial orbitofrontal cortex      | 0.12         | 0.180        | 0.468        | -0.055        | - | 0.295         | 0.03         | 0.734        | 0.886        | -0.163        | -           | 0.232         | -0.09       | 0.359  | 0.977 | -0.269 | - | 0.097 |
| middle temporal gyrus            | -0.04        | 0.622        | 0.868        | -0.215        | - | 0.128         | -0.08        | 0.392        | 0.821        | -0.274        | -           | 0.107         | -0.04       | 0.657  | 0.993 | -0.217 | - | 0.137 |
| parahippocampal gyrus            | 0.03         | 0.807        | 0.883        | -0.178        | - | 0.228         | 0.04         | 0.734        | 0.886        | -0.190        | -           | 0.269         | 0.01        | 0.893  | 0.993 | -0.198 | - | 0.227 |
| paracentral lobule               | 0.12         | 0.247        | 0.540        | -0.081        | - | 0.316         | 0.10         | 0.399        | 0.821        | -0.128        | -           | 0.321         | -0.02       | 0.847  | 0.993 | -0.229 | - | 0.188 |
| pars opercularis                 | <b>-0.20</b> | <b>0.047</b> | <b>0.206</b> | <b>-0.404</b> | - | <b>-0.003</b> | -0.15        | 0.202        | 0.711        | -0.372        | -           | 0.079         | 0.06        | 0.595  | 0.993 | -0.152 | - | 0.264 |
| pars orbitalis                   | -0.07        | 0.457        | 0.800        | -0.256        | - | 0.115         | 0.05         | 0.613        | 0.886        | -0.155        | -           | 0.263         | 0.12        | 0.209  | 0.977 | -0.070 | - | 0.319 |
| pars triangularis                | 0.11         | 0.103        | 0.361        | -0.022        | - | 0.234         | -0.13        | 0.203        | 0.711        | -0.336        | -           | 0.071         | -0.13       | 0.203  | 0.977 | -0.336 | - | 0.071 |
| pericalcarine cortex             | <b>-0.24</b> | <b>0.026</b> | <b>0.206</b> | <b>-0.451</b> | - | <b>-0.029</b> | <b>-0.27</b> | <b>0.024</b> | <b>0.469</b> | <b>-0.513</b> | -           | <b>-0.036</b> | -0.03       | 0.759  | 0.993 | -0.255 | - | 0.186 |
| postcentral gyrus                | -0.09        | 0.316        | 0.651        | -0.271        | - | 0.088         | <b>-0.22</b> | <b>0.030</b> | <b>0.469</b> | <b>-0.423</b> | -           | <b>-0.022</b> | -0.13       | 0.165  | 0.977 | -0.316 | - | 0.054 |
| posterior cingulate cortex       | -0.02        | 0.872        | 0.898        | -0.204        | - | 0.173         | 0.06         | 0.554        | 0.886        | -0.149        | -           | 0.277         | 0.08        | 0.428  | 0.993 | -0.118 | - | 0.277 |
| precentral gyrus                 | -0.17        | 0.057        | 0.222        | -0.345        | - | 0.005         | <b>-0.20</b> | <b>0.041</b> | <b>0.469</b> | <b>-0.400</b> | -           | <b>-0.009</b> | -0.03       | 0.709  | 0.993 | -0.216 | - | 0.147 |

|                                   |              |              |              |               |   |               |       |       |       |        |   |       |       |       |       |        |   |       |
|-----------------------------------|--------------|--------------|--------------|---------------|---|---------------|-------|-------|-------|--------|---|-------|-------|-------|-------|--------|---|-------|
| precuneus cortex                  | -0.12        | 0.187        | 0.468        | -0.294        | - | 0.057         | -0.07 | 0.520 | 0.886 | -0.263 | - | 0.133 | 0.05  | 0.570 | 0.993 | -0.131 | - | 0.238 |
| rostral anterior cingulate cortex | -0.05        | 0.589        | 0.868        | -0.238        | - | 0.135         | -0.03 | 0.772 | 0.886 | -0.241 | - | 0.179 | 0.02  | 0.837 | 0.993 | -0.174 | - | 0.214 |
| rostral middle frontal gyrus      | -0.03        | 0.719        | 0.868        | -0.204        | - | 0.141         | 0.10  | 0.311 | 0.780 | -0.094 | - | 0.294 | 0.13  | 0.152 | 0.977 | -0.048 | - | 0.312 |
| superior frontal gyrus            | -0.04        | 0.658        | 0.868        | -0.206        | - | 0.130         | -0.10 | 0.312 | 0.780 | -0.285 | - | 0.091 | -0.06 | 0.505 | 0.993 | -0.232 | - | 0.114 |
| superior parietal cortex          | <b>-0.19</b> | <b>0.043</b> | <b>0.206</b> | <b>-0.381</b> | - | <b>-0.006</b> | -0.03 | 0.767 | 0.886 | -0.243 | - | 0.179 | 0.16  | 0.104 | 0.977 | -0.033 | - | 0.356 |
| superior temporal gyrus           | 0.01         | 0.935        | 0.935        | -0.172        | - | 0.187         | 0.01  | 0.952 | 0.980 | -0.193 | - | 0.205 | 0.00  | 0.988 | 0.993 | -0.186 | - | 0.183 |
| supramarginal gyrus               | <b>-0.20</b> | <b>0.030</b> | <b>0.206</b> | <b>-0.382</b> | - | <b>-0.019</b> | -0.14 | 0.167 | 0.711 | -0.347 | - | 0.060 | 0.06  | 0.545 | 0.993 | -0.128 | - | 0.243 |
| frontal pole                      | -0.14        | 0.181        | 0.468        | -0.349        | - | 0.066         | -0.05 | 0.763 | 0.886 | -0.361 | - | 0.265 | 0.09  | 0.541 | 0.993 | -0.206 | - | 0.393 |
| temporal pole                     | -0.04        | 0.714        | 0.868        | -0.247        | - | 0.169         | 0.09  | 0.456 | 0.840 | -0.145 | - | 0.323 | 0.13  | 0.245 | 0.977 | -0.088 | - | 0.343 |
| transverse temporal cortex        | -0.02        | 0.839        | 0.890        | -0.226        | - | 0.183         | 0.00  | 0.998 | 0.998 | -0.230 | - | 0.231 | 0.02  | 0.843 | 0.993 | -0.192 | - | 0.235 |
| insula                            | 0.06         | 0.531        | 0.845        | -0.121        | - | 0.236         | -0.04 | 0.686 | 0.886 | -0.243 | - | 0.160 | -0.10 | 0.301 | 0.977 | -0.286 | - | 0.088 |
| full surface area                 | -0.11        | 0.137        | 0.436        | -0.249        | - | 0.034         | -0.13 | 0.114 | 0.660 | -0.287 | - | 0.031 | -0.02 | 0.783 | 0.993 | -0.170 | - | 0.128 |

Trend significant results (nominal P-value < 0.05) are color-coded orange.

A negative Effect size indicates a smaller surface area of region x in patient group y versus patient group z; a positive Effect size indicates a larger surface area of region x in patient group y versus patient group z.

**Supplementary Table S35:** mega-analytic results for each subcortical structure comparing medicated adult ADHD, ASD and OCD patients, controlling for age, sex, ICV, and scan site.

| ROI         | ADHD vs OCD  |              |                |               |   |               | ASD vs OCD |                |        |        |             | ASD vs ADHD |                |        |       |        |   |       |
|-------------|--------------|--------------|----------------|---------------|---|---------------|------------|----------------|--------|--------|-------------|-------------|----------------|--------|-------|--------|---|-------|
|             | Effect size  | P-value      | FDR<br>P-value | 95% CI        |   | Effect size   | P-value    | FDR<br>P-value | 95% CI |        | Effect size | P-value     | FDR<br>P-value | 95% CI |       |        |   |       |
| thalamus    | 0.00         | 0.976        | 0.976          | -0.157        | - | 0.162         | -0.02      | 0.876          | 0.942  | -0.234 | -           | 0.199       | -0.02          | 0.880  | 0.928 | -0.276 | - | 0.237 |
| caudate     | -0.09        | 0.358        | 0.716          | -0.278        | - | 0.101         | 0.02       | 0.861          | 0.942  | -0.236 | -           | 0.283       | 0.11           | 0.474  | 0.928 | -0.194 | - | 0.418 |
| putamen     | -0.14        | 0.138        | 0.368          | -0.315        | - | 0.044         | 0.02       | 0.887          | 0.942  | -0.217 | -           | 0.251       | 0.15           | 0.259  | 0.928 | -0.113 | - | 0.418 |
| pallidum    | <b>-0.22</b> | <b>0.018</b> | <b>0.144</b>   | <b>-0.405</b> | - | <b>-0.038</b> | -0.21      | 0.103          | 0.588  | -0.459 | -           | 0.042       | 0.01           | 0.928  | 0.928 | -0.282 | - | 0.309 |
| hippocampus | 0.02         | 0.817        | 0.976          | -0.168        | - | 0.213         | 0.10       | 0.429          | 0.942  | -0.153 | -           | 0.360       | 0.08           | 0.588  | 0.928 | -0.212 | - | 0.374 |
| amygdala    | -0.15        | 0.103        | 0.368          | -0.335        | - | 0.031         | -0.01      | 0.942          | 0.942  | -0.265 | -           | 0.246       | 0.14           | 0.352  | 0.928 | -0.158 | - | 0.443 |
| accumbens   | -0.06        | 0.501        | 0.802          | -0.247        | - | 0.121         | 0.18       | 0.147          | 0.588  | -0.064 | -           | 0.429       | 0.25           | 0.090  | 0.720 | -0.038 | - | 0.529 |
| ICV         | 0.01         | 0.887        | 0.976          | -0.169        | - | 0.196         | 0.03       | 0.818          | 0.942  | -0.220 | -           | 0.278       | 0.02           | 0.916  | 0.928 | -0.279 | - | 0.311 |

Trend significant results (nominal P-value < 0.05) are color-coded orange.

A negative Effect size indicates a smaller volume of region x in patient group y versus patient group z; a positive Effect size indicates a larger volume of region x in patient group y versus patient group z.

**Supplementary Table S36:** mega-analytic results for cortical thickness of each structure comparing medicated adult ADHD, ASD and OCD patients, controlling for age, sex and scan site.

| ROI                              | ADHD vs OCD |              |              |                      | ASD vs OCD   |              |              |                        | ASD vs ADHD  |              |              |                        |
|----------------------------------|-------------|--------------|--------------|----------------------|--------------|--------------|--------------|------------------------|--------------|--------------|--------------|------------------------|
|                                  | Effect size | P-value      | FDR P-value  | 95% CI               | Effect size  | P-value      | FDR P-value  | 95% CI                 | Effect size  | P-value      | FDR P-value  | 95% CI                 |
| banks superior temporal sulcus   | 0.09        | 0.368        | 0.670        | -0.109 - 0.294       | 0.03         | 0.836        | 0.976        | -0.236 - 0.292         | -0.06        | 0.688        | 0.939        | -0.379 - 0.250         |
| caudal anterior cingulate cortex | -0.06       | 0.591        | 0.766        | -0.260 - 0.148       | -0.02        | 0.869        | 0.976        | -0.301 - 0.255         | 0.03         | 0.846        | 0.939        | -0.296 - 0.361         |
| caudal middle frontal gyrus      | 0.06        | 0.572        | 0.766        | -0.159 - 0.287       | 0.09         | 0.521        | 0.976        | -0.190 - 0.374         | 0.03         | 0.856        | 0.939        | -0.274 - 0.330         |
| cuneus cortex                    | 0.05        | 0.675        | 0.788        | -0.169 - 0.261       | 0.07         | 0.629        | 0.976        | -0.213 - 0.352         | 0.02         | 0.885        | 0.939        | -0.296 - 0.343         |
| entorhinal cortex                | -0.12       | 0.289        | 0.670        | -0.338 - 0.101       | -0.15        | 0.327        | 0.976        | -0.439 - 0.146         | -0.03        | 0.871        | 0.939        | -0.361 - 0.306         |
| fusiform gyrus                   | 0.11        | 0.285        | 0.670        | -0.092 - 0.313       | -0.02        | 0.900        | 0.976        | -0.278 - 0.245         | -0.13        | 0.390        | 0.873        | -0.417 - 0.163         |
| inferior parietal cortex         | 0.17        | 0.072        | 0.511        | -0.016 - 0.363       | 0.00         | 0.976        | 0.976        | -0.261 - 0.253         | -0.18        | 0.252        | 0.873        | -0.481 - 0.126         |
| inferior temporal gyrus          | 0.18        | 0.117        | 0.564        | -0.045 - 0.407       | -0.04        | 0.831        | 0.976        | -0.457 - 0.368         | -0.23        | 0.305        | 0.873        | -0.656 - 0.205         |
| isthmus cingulate cortex         | 0.11        | 0.341        | 0.670        | -0.118 - 0.340       | -0.02        | 0.884        | 0.976        | -0.323 - 0.278         | -0.13        | 0.441        | 0.873        | -0.473 - 0.206         |
| lateral occipital cortex         | 0.16        | 0.145        | 0.564        | -0.055 - 0.373       | -0.09        | 0.510        | 0.976        | -0.372 - 0.185         | -0.25        | 0.113        | 0.640        | -0.565 - 0.060         |
| lateral orbitofrontal cortex     | 0.20        | 0.054        | 0.511        | -0.004 - 0.399       | -0.15        | 0.278        | 0.976        | -0.407 - 0.117         | <b>-0.34</b> | <b>0.022</b> | <b>0.385</b> | <b>-0.636 - -0.049</b> |
| lingual gyrus                    | 0.19        | 0.073        | 0.511        | -0.018 - 0.399       | 0.15         | 0.286        | 0.976        | -0.126 - 0.427         | -0.04        | 0.806        | 0.939        | -0.359 - 0.279         |
| medial orbitofrontal cortex      | <b>0.23</b> | <b>0.019</b> | <b>0.511</b> | <b>0.039 - 0.430</b> | -0.01        | 0.946        | 0.976        | -0.275 - 0.257         | -0.24        | 0.128        | 0.640        | -0.559 - 0.071         |
| middle temporal gyrus            | 0.20        | 0.070        | 0.511        | -0.017 - 0.420       | 0.13         | 0.338        | 0.976        | -0.141 - 0.411         | -0.07        | 0.672        | 0.939        | -0.377 - 0.243         |
| parahippocampal gyrus            | 0.19        | 0.100        | 0.564        | -0.036 - 0.406       | <b>-0.31</b> | <b>0.042</b> | <b>0.976</b> | <b>-0.602 - -0.012</b> | <b>-0.49</b> | <b>0.004</b> | <b>0.140</b> | <b>-0.828 - -0.156</b> |
| paracentral lobule               | 0.07        | 0.516        | 0.753        | -0.139 - 0.276       | -0.07        | 0.634        | 0.976        | -0.335 - 0.204         | -0.13        | 0.384        | 0.873        | -0.437 - 0.168         |
| pars opercularis                 | 0.02        | 0.880        | 0.906        | -0.198 - 0.230       | 0.10         | 0.467        | 0.976        | -0.172 - 0.374         | 0.08         | 0.574        | 0.939        | -0.211 - 0.381         |
| pars orbitalis                   | 0.14        | 0.210        | 0.615        | -0.079 - 0.360       | -0.08        | 0.604        | 0.976        | -0.367 - 0.213         | -0.22        | 0.196        | 0.858        | -0.546 - 0.112         |
| pars triangularis                | 0.10        | 0.383        | 0.670        | -0.122 - 0.319       | 0.18         | 0.210        | 0.976        | -0.102 - 0.461         | 0.08         | 0.601        | 0.939        | -0.224 - 0.388         |
| pericalcarine cortex             | -0.04       | 0.699        | 0.789        | -0.228 - 0.153       | 0.13         | 0.328        | 0.976        | -0.127 - 0.379         | 0.16         | 0.271        | 0.873        | -0.128 - 0.455         |
| postcentral gyrus                | 0.07        | 0.479        | 0.729        | -0.132 - 0.281       | -0.21        | 0.133        | 0.976        | -0.477 - 0.063         | -0.28        | 0.071        | 0.621        | -0.588 - 0.024         |
| posterior cingulate cortex       | 0.01        | 0.942        | 0.942        | -0.202 - 0.218       | 0.03         | 0.802        | 0.976        | -0.238 - 0.308         | 0.03         | 0.862        | 0.939        | -0.278 - 0.333         |
| precentral gyrus                 | -0.02       | 0.832        | 0.882        | -0.233 - 0.187       | -0.14        | 0.321        | 0.976        | -0.402 - 0.132         | -0.11        | 0.449        | 0.873        | -0.404 - 0.178         |

|                                          |       |       |       |        |   |       |       |       |       |        |   |       |              |              |              |               |   |               |
|------------------------------------------|-------|-------|-------|--------|---|-------|-------|-------|-------|--------|---|-------|--------------|--------------|--------------|---------------|---|---------------|
| <b>precuneus cortex</b>                  | 0.16  | 0.192 | 0.615 | -0.082 | - | 0.409 | 0.03  | 0.824 | 0.976 | -0.268 | - | 0.337 | -0.13        | 0.413        | 0.873        | -0.439        | - | 0.180         |
| <b>rostral anterior cingulate cortex</b> | -0.04 | 0.668 | 0.788 | -0.249 | - | 0.160 | 0.00  | 0.975 | 0.976 | -0.274 | - | 0.265 | 0.04         | 0.796        | 0.939        | -0.267        | - | 0.348         |
| <b>rostral middle frontal gyrus</b>      | 0.09  | 0.406 | 0.671 | -0.122 | - | 0.300 | 0.02  | 0.884 | 0.976 | -0.251 | - | 0.292 | -0.07        | 0.652        | 0.939        | -0.369        | - | 0.231         |
| <b>superior frontal gyrus</b>            | 0.11  | 0.336 | 0.670 | -0.118 | - | 0.346 | 0.12  | 0.413 | 0.976 | -0.169 | - | 0.411 | 0.01         | 0.962        | 0.962        | -0.297        | - | 0.312         |
| <b>superior parietal cortex</b>          | 0.05  | 0.634 | 0.788 | -0.143 | - | 0.235 | 0.03  | 0.814 | 0.976 | -0.226 | - | 0.288 | -0.02        | 0.922        | 0.949        | -0.320        | - | 0.289         |
| <b>superior temporal gyrus</b>           | 0.09  | 0.422 | 0.671 | -0.124 | - | 0.296 | -0.06 | 0.772 | 0.976 | -0.477 | - | 0.354 | -0.15        | 0.511        | 0.939        | -0.587        | - | 0.292         |
| <b>supramarginal gyrus</b>               | 0.07  | 0.585 | 0.766 | -0.180 | - | 0.318 | -0.08 | 0.605 | 0.976 | -0.384 | - | 0.224 | -0.15        | 0.337        | 0.873        | -0.455        | - | 0.156         |
| <b>frontal pole</b>                      | 0.14  | 0.211 | 0.615 | -0.077 | - | 0.347 | -0.14 | 0.361 | 0.976 | -0.428 | - | 0.156 | -0.27        | 0.122        | 0.640        | -0.615        | - | 0.073         |
| <b>temporal pole</b>                     | -0.16 | 0.129 | 0.564 | -0.377 | - | 0.048 | -0.14 | 0.349 | 0.976 | -0.426 | - | 0.150 | 0.03         | 0.877        | 0.939        | -0.315        | - | 0.368         |
| <b>transverse temporal cortex</b>        | 0.03  | 0.773 | 0.845 | -0.199 | - | 0.268 | -0.01 | 0.935 | 0.976 | -0.310 | - | 0.285 | -0.05        | 0.780        | 0.939        | -0.375        | - | 0.282         |
| <b>insula</b>                            | 0.10  | 0.368 | 0.670 | -0.121 | - | 0.327 | -0.22 | 0.138 | 0.976 | -0.500 | - | 0.069 | <b>-0.32</b> | <b>0.042</b> | <b>0.490</b> | <b>-0.625</b> | - | <b>-0.012</b> |
| <b>average thickness</b>                 | 0.13  | 0.249 | 0.670 | -0.092 | - | 0.356 | -0.03 | 0.848 | 0.976 | -0.306 | - | 0.251 | -0.16        | 0.283        | 0.873        | -0.449        | - | 0.131         |

Trend significant results (nominal P-value < 0.05) are color-coded orange.

A negative Effect size indicates a thinner cortex of region x in patient group y versus patient group z; a positive Effect size indicates a thicker cortex of region x in patient group y versus patient group z.

**Supplementary Table S37:** mega-analytic results for surface area of each structure comparing medicated adult ADHD, ASD and OCD patients, controlling for age, sex, ICV, and scan site.

| ROI                                     | ADHD vs OCD |         |             |        |         | ASD vs OCD  |         |             |        |         | ASD vs ADHD |         |             |        |         |
|-----------------------------------------|-------------|---------|-------------|--------|---------|-------------|---------|-------------|--------|---------|-------------|---------|-------------|--------|---------|
|                                         | Effect size | P-value | FDR P-value | 95% CI |         | Effect size | P-value | FDR P-value | 95% CI |         | Effect size | P-value | FDR P-value | 95% CI |         |
| <b>banks superior temporal sulcus</b>   | 0.03        | 0.797   | 0.980       | -0.177 | - 0.231 | -0.06       | 0.659   | 0.841       | -0.330 | - 0.209 | -0.09       | 0.591   | 0.916       | -0.407 | - 0.232 |
| <b>caudal anterior cingulate cortex</b> | -0.08       | 0.428   | 0.980       | -0.286 | - 0.121 | 0.17        | 0.231   | 0.841       | -0.109 | - 0.451 | 0.25        | 0.131   | 0.718       | -0.076 | - 0.582 |
| <b>caudal middle frontal gyrus</b>      | 0.04        | 0.675   | 0.980       | -0.162 | - 0.251 | 0.10        | 0.476   | 0.841       | -0.176 | - 0.378 | 0.06        | 0.724   | 0.916       | -0.258 | - 0.372 |
| <b>cuneus cortex</b>                    | -0.06       | 0.583   | 0.980       | -0.273 | - 0.153 | -0.15       | 0.294   | 0.841       | -0.439 | - 0.133 | -0.09       | 0.578   | 0.916       | -0.423 | - 0.236 |
| <b>entorhinal cortex</b>                | 0.11        | 0.307   | 0.980       | -0.105 | - 0.334 | -0.12       | 0.457   | 0.841       | -0.419 | - 0.188 | -0.23       | 0.203   | 0.789       | -0.583 | - 0.124 |
| <b>fusiform gyrus</b>                   | -0.03       | 0.774   | 0.980       | -0.224 | - 0.167 | -0.08       | 0.547   | 0.841       | -0.340 | - 0.180 | -0.05       | 0.736   | 0.916       | -0.349 | - 0.246 |
| <b>inferior parietal cortex</b>         | 0.00        | 0.999   | 0.999       | -0.186 | - 0.186 | -0.12       | 0.372   | 0.841       | -0.370 | - 0.139 | -0.12       | 0.448   | 0.916       | -0.415 | - 0.183 |
| <b>inferior temporal gyrus</b>          | 0.04        | 0.707   | 0.980       | -0.151 | - 0.223 | -0.08       | 0.558   | 0.841       | -0.327 | - 0.176 | -0.11       | 0.465   | 0.916       | -0.409 | - 0.187 |
| <b>isthmus cingulate cortex</b>         | 0.02        | 0.871   | 0.980       | -0.176 | - 0.208 | 0.26        | 0.050   | 0.469       | 0.000  | - 0.524 | 0.25        | 0.119   | 0.718       | -0.063 | - 0.555 |
| <b>lateral occipital cortex</b>         | -0.02       | 0.815   | 0.980       | -0.233 | - 0.183 | 0.25        | 0.067   | 0.469       | -0.018 | - 0.525 | 0.28        | 0.071   | 0.718       | -0.024 | - 0.581 |
| <b>lateral orbitofrontal cortex</b>     | -0.08       | 0.377   | 0.980       | -0.259 | - 0.098 | 0.04        | 0.758   | 0.856       | -0.205 | - 0.281 | 0.12        | 0.419   | 0.916       | -0.169 | - 0.406 |
| <b>lingual gyrus</b>                    | 0.17        | 0.114   | 0.980       | -0.041 | - 0.384 | -0.06       | 0.665   | 0.841       | -0.352 | - 0.225 | -0.24       | 0.164   | 0.718       | -0.567 | - 0.096 |
| <b>medial orbitofrontal cortex</b>      | -0.14       | 0.125   | 0.980       | -0.320 | - 0.039 | -0.05       | 0.697   | 0.841       | -0.294 | - 0.196 | 0.09        | 0.534   | 0.916       | -0.198 | - 0.381 |
| <b>middle temporal gyrus</b>            | 0.03        | 0.720   | 0.980       | -0.156 | - 0.226 | -0.11       | 0.392   | 0.841       | -0.357 | - 0.140 | -0.14       | 0.331   | 0.916       | -0.432 | - 0.145 |
| <b>parahippocampal gyrus</b>            | -0.07       | 0.488   | 0.980       | -0.276 | - 0.132 | -0.07       | 0.607   | 0.841       | -0.356 | - 0.208 | 0.00        | 0.990   | 0.990       | -0.333 | - 0.329 |
| <b>paracentral lobule</b>               | 0.02        | 0.864   | 0.980       | -0.179 | - 0.213 | 0.14        | 0.301   | 0.841       | -0.127 | - 0.412 | 0.13        | 0.439   | 0.916       | -0.192 | - 0.443 |
| <b>pars opercularis</b>                 | 0.19        | 0.055   | 0.980       | -0.004 | - 0.393 | 0.24        | 0.087   | 0.508       | -0.034 | - 0.512 | 0.04        | 0.785   | 0.916       | -0.276 | - 0.366 |
| <b>pars orbitalis</b>                   | -0.03       | 0.753   | 0.980       | -0.221 | - 0.160 | 0.03        | 0.835   | 0.909       | -0.232 | - 0.288 | 0.06        | 0.710   | 0.916       | -0.249 | - 0.365 |
| <b>pars triangularis</b>                | -0.04       | 0.687   | 0.980       | -0.250 | - 0.165 | 0.28        | 0.054   | 0.469       | -0.005 | - 0.557 | 0.32        | 0.052   | 0.718       | -0.003 | - 0.640 |
| <b>pericalcarine cortex</b>             | -0.02       | 0.882   | 0.980       | -0.227 | - 0.195 | -0.08       | 0.584   | 0.841       | -0.368 | - 0.207 | -0.06       | 0.710   | 0.916       | -0.404 | - 0.275 |
| <b>postcentral gyrus</b>                | 0.12        | 0.217   | 0.980       | -0.072 | - 0.317 | 0.02        | 0.857   | 0.909       | -0.238 | - 0.286 | -0.10       | 0.522   | 0.916       | -0.399 | - 0.203 |
| <b>posterior cingulate cortex</b>       | -0.11       | 0.327   | 0.980       | -0.322 | - 0.107 | 0.11        | 0.431   | 0.841       | -0.167 | - 0.391 | 0.22        | 0.164   | 0.718       | -0.090 | - 0.529 |
| <b>precentral gyrus</b>                 | 0.13        | 0.160   | 0.980       | -0.051 | - 0.308 | 0.15        | 0.221   | 0.841       | -0.092 | - 0.398 | 0.02        | 0.870   | 0.923       | -0.265 | - 0.313 |

|                                          |       |       |       |        |   |       |       |       |       |        |   |       |             |              |              |              |   |              |
|------------------------------------------|-------|-------|-------|--------|---|-------|-------|-------|-------|--------|---|-------|-------------|--------------|--------------|--------------|---|--------------|
| <b>precuneus cortex</b>                  | -0.10 | 0.301 | 0.980 | -0.278 | - | 0.086 | -0.07 | 0.592 | 0.841 | -0.316 | - | 0.180 | 0.03        | 0.851        | 0.923        | -0.265       | - | 0.321        |
| <b>rostral anterior cingulate cortex</b> | -0.08 | 0.408 | 0.980 | -0.272 | - | 0.111 | 0.06  | 0.674 | 0.841 | -0.205 | - | 0.317 | 0.14        | 0.384        | 0.916        | -0.171       | - | 0.445        |
| <b>rostral middle frontal gyrus</b>      | -0.02 | 0.835 | 0.980 | -0.201 | - | 0.163 | 0.00  | 0.978 | 0.994 | -0.246 | - | 0.240 | 0.02        | 0.911        | 0.938        | -0.264       | - | 0.296        |
| <b>superior frontal gyrus</b>            | -0.06 | 0.520 | 0.980 | -0.240 | - | 0.121 | 0.00  | 0.994 | 0.994 | -0.239 | - | 0.237 | 0.06        | 0.672        | 0.916        | -0.212       | - | 0.328        |
| <b>superior parietal cortex</b>          | -0.01 | 0.952 | 0.980 | -0.204 | - | 0.192 | 0.25  | 0.062 | 0.469 | -0.013 | - | 0.517 | 0.26        | 0.097        | 0.718        | -0.046       | - | 0.562        |
| <b>superior temporal gyrus</b>           | -0.02 | 0.870 | 0.980 | -0.209 | - | 0.177 | 0.05  | 0.692 | 0.841 | -0.200 | - | 0.302 | 0.07        | 0.651        | 0.916        | -0.222       | - | 0.356        |
| <b>supramarginal gyrus</b>               | 0.02  | 0.837 | 0.980 | -0.174 | - | 0.215 | 0.09  | 0.492 | 0.841 | -0.171 | - | 0.355 | 0.07        | 0.640        | 0.916        | -0.229       | - | 0.372        |
| <b>frontal pole</b>                      | -0.19 | 0.088 | 0.980 | -0.400 | - | 0.027 | -0.24 | 0.110 | 0.550 | -0.531 | - | 0.054 | -0.05       | 0.768        | 0.916        | -0.397       | - | 0.293        |
| <b>temporal pole</b>                     | 0.09  | 0.386 | 0.980 | -0.120 | - | 0.309 | 0.14  | 0.331 | 0.841 | -0.147 | - | 0.437 | 0.05        | 0.775        | 0.916        | -0.294       | - | 0.394        |
| <b>transverse temporal cortex</b>        | 0.01  | 0.944 | 0.980 | -0.205 | - | 0.221 | 0.05  | 0.743 | 0.856 | -0.241 | - | 0.338 | 0.04        | 0.812        | 0.917        | -0.297       | - | 0.378        |
| <b>insula</b>                            | -0.08 | 0.345 | 0.980 | -0.258 | - | 0.090 | 0.23  | 0.055 | 0.469 | -0.005 | - | 0.469 | <b>0.32</b> | <b>0.027</b> | <b>0.718</b> | <b>0.036</b> | - | <b>0.596</b> |
| <b>full surface area</b>                 | 0.01  | 0.951 | 0.980 | -0.159 | - | 0.169 | 0.07  | 0.548 | 0.841 | -0.150 | - | 0.283 | 0.06        | 0.628        | 0.916        | -0.187       | - | 0.309        |

Trend significant results (nominal P-value < 0.05) are color-coded orange.

A negative Effect size indicates a smaller surface area of region x in patient group y versus patient group z; a positive Effect size indicates a larger surface area of region x in patient group y versus patient group z.

**Supplementary Table S38:** mega-analytic results for each subcortical structure comparing medicated adolescent ADHD, ASD and OCD patients, controlling for age, sex, ICV, and scan site.

| ROI         | ADHD vs OCD  |              |              |               |   | ASD vs OCD    |         |             |        |        | ASD vs ADHD |         |             |        |       |        |   |       |
|-------------|--------------|--------------|--------------|---------------|---|---------------|---------|-------------|--------|--------|-------------|---------|-------------|--------|-------|--------|---|-------|
|             | Effect size  | P-value      | FDR P-value  | 95% CI        |   | Effect size   | P-value | FDR P-value | 95% CI |        | Effect size | P-value | FDR P-value | 95% CI |       |        |   |       |
| thalamus    | -0.10        | 0.325        | 0.650        | -0.305        | - | 0.101         | -0.17   | 0.134       | 0.600  | -0.389 | -           | 0.052   | -0.07       | 0.586  | 0.781 | -0.307 | - | 0.174 |
| caudate     | -0.21        | 0.062        | 0.165        | -0.438        | - | 0.011         | -0.03   | 0.823       | 0.849  | -0.295 | -           | 0.235   | 0.18        | 0.186  | 0.496 | -0.089 | - | 0.456 |
| putamen     | -0.01        | 0.957        | 0.957        | -0.223        | - | 0.211         | 0.19    | 0.150       | 0.600  | -0.068 | -           | 0.444   | 0.19        | 0.147  | 0.496 | -0.068 | - | 0.456 |
| pallidum    | -0.09        | 0.407        | 0.651        | -0.310        | - | 0.126         | 0.03    | 0.835       | 0.849  | -0.229 | -           | 0.283   | 0.12        | 0.370  | 0.740 | -0.142 | - | 0.380 |
| hippocampus | 0.02         | 0.852        | 0.957        | -0.189        | - | 0.229         | 0.02    | 0.849       | 0.849  | -0.222 | -           | 0.270   | 0.00        | 0.975  | 0.975 | -0.249 | - | 0.257 |
| amygdala    | -0.01        | 0.901        | 0.957        | -0.230        | - | 0.202         | -0.06   | 0.665       | 0.849  | -0.312 | -           | 0.199   | -0.04       | 0.748  | 0.855 | -0.303 | - | 0.218 |
| accumbens   | 0.21         | 0.058        | 0.165        | -0.008        | - | 0.435         | 0.14    | 0.307       | 0.819  | -0.125 | -           | 0.399   | -0.08       | 0.578  | 0.781 | -0.348 | - | 0.194 |
| ICV         | <b>-0.25</b> | <b>0.016</b> | <b>0.128</b> | <b>-0.461</b> | - | <b>-0.047</b> | 0.10    | 0.451       | 0.849  | -0.165 | -           | 0.371   | 0.36        | 0.008  | 0.064 | 0.094  | - | 0.619 |

Trend significant results (nominal P-value < 0.05) are color-coded orange.

A negative Effect size indicates a smaller volume of region x in patient group y versus patient group z; a positive Effect size indicates a larger volume of region x in patient group y versus patient group z.













































































































**Supplementary Table S71:** mega-analytic results for each subcortical structure comparing adolescent ADHD, ASD and OCD patients to healthy control subjects, controlling for age, sex, ICV, scan site and IQ.

| ROI                | OCD vs HC   |         |             |        |   |             | ADHD vs HC   |              |              |               |             |               | ASD vs HC    |              |              |               |          |               |
|--------------------|-------------|---------|-------------|--------|---|-------------|--------------|--------------|--------------|---------------|-------------|---------------|--------------|--------------|--------------|---------------|----------|---------------|
|                    | Effect size | P-value | FDR P-value | 95% CI |   | Effect size | P-value      | FDR P-value  | 95% CI       |               | Effect size | P-value       | FDR P-value  | 95% CI       |              |               |          |               |
| <b>thalamus</b>    | 0.11        | 0.162   | 0.432       | -0.044 | - | 0.265       | 0.04         | 0.374        | 0.886        | -0.054        | -           | 0.144         | -0.05        | 0.233        | 0.466        | -0.137        | -        | 0.033         |
| <b>caudate</b>     | 0.05        | 0.628   | 0.787       | -0.144 | - | 0.239       | -0.01        | 0.821        | 0.886        | -0.131        | -           | 0.104         | <b>-0.12</b> | <b>0.022</b> | <b>0.176</b> | <b>-0.230</b> | <b>-</b> | <b>-0.018</b> |
| <b>putamen</b>     | 0.15        | 0.117   | 0.432       | -0.039 | - | 0.347       | -0.03        | 0.645        | 0.886        | -0.136        | -           | 0.084         | -0.12        | 0.155        | 0.466        | -0.287        | -        | 0.046         |
| <b>pallidum</b>    | 0.18        | 0.067   | 0.432       | -0.012 | - | 0.363       | -0.04        | 0.446        | 0.886        | -0.151        | -           | 0.067         | -0.10        | 0.178        | 0.466        | -0.252        | -        | 0.047         |
| <b>hippocampus</b> | 0.09        | 0.279   | 0.558       | -0.076 | - | 0.264       | 0.02         | 0.704        | 0.886        | -0.082        | -           | 0.122         | 0.03         | 0.678        | 0.731        | -0.094        | -        | 0.145         |
| <b>amygdala</b>    | -0.03       | 0.775   | 0.787       | -0.205 | - | 0.152       | 0.01         | 0.886        | 0.886        | -0.099        | -           | 0.115         | -0.03        | 0.731        | 0.731        | -0.179        | -        | 0.126         |
| <b>accumbens</b>   | 0.04        | 0.697   | 0.787       | -0.152 | - | 0.227       | -0.05        | 0.425        | 0.886        | -0.159        | -           | 0.067         | -0.11        | 0.292        | 0.467        | -0.327        | -        | 0.098         |
| <b>ICV</b>         | 0.03        | 0.787   | 0.787       | -0.162 | - | 0.213       | <b>-0.16</b> | <b>0.002</b> | <b>0.016</b> | <b>-0.252</b> | <b>-</b>    | <b>-0.059</b> | 0.05         | 0.364        | 0.485        | -0.056        | -        | 0.153         |

Significant results, corrected for multiple comparisons (FDR P-value  $\leq 0.05$ ), are color-coded red; trend significant results (nominal P-value  $< 0.05$ ) are color-coded orange.

A negative Effect size indicates a smaller volume of region x in patient group y versus healthy controls; a positive Effect size indicates a larger volume of region x in patient group y versus healthy controls.







|                                   |              |              |              |               |   |               |       |       |       |        |   |       |       |       |       |        |   |       |
|-----------------------------------|--------------|--------------|--------------|---------------|---|---------------|-------|-------|-------|--------|---|-------|-------|-------|-------|--------|---|-------|
| precuneus cortex                  | -0.11        | 0.191        | 0.560        | -0.281        | - | 0.056         | -0.01 | 0.745 | 0.860 | -0.102 | - | 0.073 | -0.02 | 0.833 | 0.926 | -0.163 | - | 0.132 |
| rostral anterior cingulate cortex | -0.12        | 0.173        | 0.560        | -0.303        | - | 0.054         | -0.04 | 0.442 | 0.832 | -0.128 | - | 0.056 | -0.08 | 0.325 | 0.636 | -0.229 | - | 0.076 |
| rostral middle frontal gyrus      | -0.15        | 0.078        | 0.537        | -0.321        | - | 0.017         | -0.03 | 0.553 | 0.832 | -0.113 | - | 0.060 | -0.02 | 0.643 | 0.825 | -0.119 | - | 0.074 |
| superior frontal gyrus            | <b>-0.17</b> | <b>0.043</b> | <b>0.376</b> | <b>-0.326</b> | - | <b>-0.005</b> | -0.04 | 0.315 | 0.832 | -0.124 | - | 0.040 | -0.04 | 0.483 | 0.720 | -0.167 | - | 0.079 |
| superior parietal cortex          | -0.12        | 0.181        | 0.560        | -0.302        | - | 0.057         | -0.08 | 0.088 | 0.832 | -0.172 | - | 0.012 | -0.05 | 0.384 | 0.636 | -0.148 | - | 0.057 |
| superior temporal gyrus           | -0.01        | 0.864        | 0.947        | -0.182        | - | 0.152         | 0.00  | 0.964 | 0.964 | -0.088 | - | 0.084 | -0.04 | 0.400 | 0.636 | -0.133 | - | 0.053 |
| supramarginal gyrus               | 0.10         | 0.273        | 0.683        | -0.079        | - | 0.279         | -0.02 | 0.618 | 0.832 | -0.111 | - | 0.066 | -0.07 | 0.345 | 0.636 | -0.204 | - | 0.071 |
| frontal pole                      | -0.03        | 0.771        | 0.947        | -0.229        | - | 0.170         | -0.07 | 0.214 | 0.832 | -0.173 | - | 0.039 | 0.11  | 0.193 | 0.636 | -0.053 | - | 0.263 |
| temporal pole                     | 0.05         | 0.651        | 0.907        | -0.155        | - | 0.248         | 0.01  | 0.786 | 0.860 | -0.091 | - | 0.120 | -0.05 | 0.376 | 0.636 | -0.170 | - | 0.064 |
| transverse temporal cortex        | -0.01        | 0.896        | 0.947        | -0.207        | - | 0.181         | 0.02  | 0.767 | 0.860 | -0.087 | - | 0.118 | -0.03 | 0.660 | 0.825 | -0.182 | - | 0.115 |
| insula                            | -0.07        | 0.426        | 0.834        | -0.242        | - | 0.102         | 0.03  | 0.509 | 0.832 | -0.056 | - | 0.113 | -0.01 | 0.903 | 0.937 | -0.151 | - | 0.133 |
| full surface area                 | -0.09        | 0.169        | 0.560        | -0.224        | - | 0.039         | -0.02 | 0.560 | 0.832 | -0.089 | - | 0.048 | -0.07 | 0.314 | 0.636 | -0.202 | - | 0.065 |

Significant results, corrected for multiple comparisons (FDR P-value  $\leq 0.05$ ), are color-coded red; trend significant results (nominal P-value  $< 0.05$ ) are color-coded orange.

A negative Effect size indicates a smaller surface area of region x in patient group y versus healthy controls; a positive Effect size indicates a larger surface area of region x in patient group y versus healthy controls.

**Supplementary Table S74:** Correlations of the overall effect sizes of the mega-analytic results comparing pediatric ADHD, ASD and OCD patients to healthy control subjects, controlling for age, sex, ICV, and scan site.

| <b>Pediatric</b>   |           |            |           |                       |           |            |           |                          |           |            |           |
|--------------------|-----------|------------|-----------|-----------------------|-----------|------------|-----------|--------------------------|-----------|------------|-----------|
| <b>Subcortical</b> | OCD vs HC | ADHD vs HC | ASD vs HC | <b>Cort Thickness</b> | OCD vs HC | ADHD vs HC | ASD vs HC | <b>Cort Surface area</b> | OCD vs HC | ADHD vs HC | ASD vs HC |
| OCD vs HC          | 1         |            |           | OCD vs HC             | 1         |            |           | OCD vs HC                | 1         |            |           |
| ADHD vs HC         | -0.07877  | 1          |           | ADHD vs HC            | 0.363059  | 1          |           | ADHD vs HC               | -0.01911  | 1          |           |
| ASD vs HC          | 0.172642  | 0.020101   | 1         | ASD vs HC             | 0.235374  | 0.370689   | 1         | ASD vs HC                | 0.045279  | -0.06884   | 11        |
| <b>Adolescents</b> |           |            |           |                       |           |            |           |                          |           |            |           |
| <b>Subcortical</b> | OCD vs HC | ADHD vs HC | ASD vs HC | <b>Cort Thickness</b> | OCD vs HC | ADHD vs HC | ASD vs HC | <b>Cort Surface area</b> | OCD vs HC | ADHD vs HC | ASD vs HC |
| OCD vs HC          | 1         |            |           | OCD vs HC             | 1         |            |           | OCD vs HC                | 1         |            |           |
| ADHD vs HC         | 0.461147  | 1          |           | ADHD vs HC            | -0.19114  | 1          |           | ADHD vs HC               | -0.14856  | 1          |           |
| ASD vs HC          | 0.251488  | -0.30208   | 1         | ASD vs HC             | 0.006728  | 0.290681   | 1         | ASD vs HC                | 0.284233  | 0.318223   | 11        |
| <b>Adults</b>      |           |            |           |                       |           |            |           |                          |           |            |           |
| <b>Subcortical</b> | OCD vs HC | ADHD vs HC | ASD vs HC | <b>Cort Thickness</b> | OCD vs HC | ADHD vs HC | ASD vs HC | <b>Cort Surface area</b> | OCD vs HC | ADHD vs HC | ASD vs HC |
| OCD vs HC          | 1         |            |           | OCD vs HC             | 1         |            |           | OCD vs HC                | 1         |            |           |
| ADHD vs HC         | 0.446089  | 1          |           | ADHD vs HC            | -0.08083  | 1          |           | ADHD vs HC               | 0.185934  | 1          |           |
| ASD vs HC          | 0.515263  | 0.369503   | 1         | ASD vs HC             | -0.0028   | -0.02121   | 1         | ASD vs HC                | -0.34197  | -0.25307   | 11        |

Significant results, corrected for multiple comparisons (FDR P-value  $\leq 0.05$ ), are color-coded red; trend significant results (nominal P-value  $< 0.05$ ) are color-coded orange. The effect sizes that form the basis of these correlations can be found in Supplementary Tables S05-S13.

**Supplementary Table S75:** distribution of group sizes for all diagnostic groups in all age bins, comparing the number of samples scanned with 1.5 Tesla vs 3 Tesla field strength scanners.

| <b>Group</b>               | <b>N 3 Tesla</b> | <b>N 1.5 Tesla</b> |
|----------------------------|------------------|--------------------|
| <b>Pediatric Controls</b>  | 317              | 1267               |
| <b>Pediatric OCD</b>       | 20               | 120                |
| <b>Pediatric ADHD</b>      | 149              | 560                |
| <b>Pediatric ASD</b>       | 179              | 540                |
| <b>Adolescent Controls</b> | 322              | 1071               |
| <b>Adolescent OCD</b>      | 97               | 262                |
| <b>Adolescent ADHD</b>     | 242              | 391                |
| <b>Adolescent ASD</b>      | 81               | 459                |
| <b>Adult Controls</b>      | 1299             | 1549               |
| <b>Adult OCD</b>           | 839              | 985                |
| <b>Adult ADHD</b>          | 493              | 436                |
| <b>Adult ASD</b>           | 77               | 378                |

**Supplementary Table S76:** mega-analytic results for each subcortical structure comparing pediatric ADHD, ASD and OCD patients to healthy control subjects, split by samples using a 1.5 Tesla and 3 Tesla scanner.

| ROI                | OCD vs HC        |              |                    |              | ADHD vs HC       |              |                     |              | ASD vs HC        |              |                     |              |
|--------------------|------------------|--------------|--------------------|--------------|------------------|--------------|---------------------|--------------|------------------|--------------|---------------------|--------------|
|                    | Effect size (3T) | P-value      | Effect size (1.5T) | P-value      | Effect size (3T) | P-value      | Effect size (1.5 T) | P-value      | Effect size (3T) | P-value      | Effect size (1.5 T) | P-value      |
| <b>ICV</b>         | 0.157            | 0.070        | 0.130              | 0.488        | -0.126           | <b>0.004</b> | -0.140              | <b>0.044</b> | 0.144            | <b>0.009</b> | 0.054               | 0.621        |
| <b>thalamus</b>    | 0.208            | <b>0.063</b> | 0.196              | 0.375        | -0.046           | 0.402        | <b>0.189</b>        | 0.324        | 0.105            | 0.315        | 0.069               | 0.562        |
| <b>caudate</b>     | -0.010           | 0.932        | <b>0.111</b>       | 0.679        | -0.147           | <b>0.014</b> | -0.195              | 0.092        | -0.021           | 0.812        | -0.023              | 0.871        |
| <b>putamen</b>     | 0.181            | 0.107        | 0.362              | 0.206        | -0.204           | <b>0.000</b> | -0.235              | <b>0.030</b> | -0.036           | 0.726        | <b>0.131</b>        | 0.191        |
| <b>pallidum</b>    | 0.056            | 0.633        | <b>-0.185</b>      | 0.521        | -0.140           | <b>0.011</b> | -0.190              | 0.083        | -0.046           | 0.599        | <b>0.209</b>        | <b>0.052</b> |
| <b>hippocampus</b> | 0.213            | <b>0.050</b> | 0.388              | <b>0.054</b> | -0.152           | <b>0.005</b> | -0.186              | <b>0.022</b> | -0.021           | 0.769        | <b>0.016</b>        | 0.894        |
| <b>amygdala</b>    | 0.098            | 0.407        | 0.883              | <b>0.000</b> | -0.182           | <b>0.001</b> | -0.160              | <b>0.047</b> | -0.016           | 0.825        | -0.087              | 0.243        |
| <b>accumbens</b>   | 0.081            | 0.463        | 0.275              | 0.300        | -0.217           | <b>0.000</b> | -0.125              | 0.242        | -0.056           | 0.570        | <b>0.047</b>        | 0.705        |

Significant results, uncorrected for multiple comparisons are indicated in **bold**. Results where the direct of effect is different between 1.5 and 3 Tesla are indicated in **red**.

A negative Effect size indicates a smaller volume of region x in patient group y versus healthy controls; a positive Effect size indicates a larger volume of region x in patient group y versus healthy controls.









**Supplementary Table S79:** mega-analytic results for each subcortical structure comparing adolescent ADHD, ASD and OCD patients to healthy control subjects, split by samples using a 1.5 Tesla and 3 Tesla scanner.

| ROI                | OCD vs HC        |         |                    |         | ADHD vs HC       |              |                     |         | ASD vs HC        |         |                     |         |
|--------------------|------------------|---------|--------------------|---------|------------------|--------------|---------------------|---------|------------------|---------|---------------------|---------|
|                    | Effect size (3T) | P-value | Effect size (1.5T) | P-value | Effect size (3T) | P-value      | Effect size (1.5 T) | P-value | Effect size (3T) | P-value | Effect size (1.5 T) | P-value |
| <b>ICV</b>         | -0.007           | 0.923   | <b>0.039</b>       | 0.739   | -0.213           | <b>0.000</b> | -0.135              | 0.084   | 0.058            | 0.400   | 0.041               | 0.806   |
| <b>thalamus</b>    | 0.045            | 0.576   | 0.200              | 0.109   | -0.110           | 0.166        | -0.094              | 0.373   | 0.013            | 0.870   | <b>-0.015</b>       | 0.929   |
| <b>caudate</b>     | -0.018           | 0.833   | <b>0.257</b>       | 0.054   | -0.152           | 0.080        | -0.177              | 0.068   | 0.007            | 0.931   | 0.003               | 0.982   |
| <b>putamen</b>     | -0.056           | 0.482   | <b>0.118</b>       | 0.340   | -0.211           | <b>0.007</b> | -0.031              | 0.721   | -0.086           | 0.296   | -0.131              | 0.379   |
| <b>pallidum</b>    | 0.040            | 0.621   | <b>-0.115</b>      | 0.352   | -0.197           | <b>0.011</b> | -0.115              | 0.191   | -0.075           | 0.420   | <b>0.014</b>        | 0.923   |
| <b>hippocampus</b> | 0.050            | 0.525   | 0.081              | 0.530   | -0.126           | 0.113        | -0.142              | 0.125   | 0.055            | 0.423   | <b>-0.083</b>       | 0.707   |
| <b>amygdala</b>    | 0.021            | 0.803   | 0.068              | 0.575   | -0.116           | 0.148        | -0.192              | 0.030   | 0.043            | 0.592   | <b>-0.094</b>       | 0.507   |
| <b>accumbens</b>   | -0.027           | 0.725   | -0.106             | 0.351   | -0.164           | <b>0.033</b> | -0.027              | 0.736   | -0.011           | 0.923   | -0.094              | 0.481   |

Significant results, uncorrected for multiple comparisons are indicated in **bold**. Results where the direct of effect is different between 1.5 and 3 Tesla are indicated in **red**.

A negative Effect size indicates a smaller volume of region x in patient group y versus healthy controls; a positive Effect size indicates a larger volume of region x in patient group y versus healthy controls.



|                                   |        |       |              |       |        |              |              |       |        |       |              |       |
|-----------------------------------|--------|-------|--------------|-------|--------|--------------|--------------|-------|--------|-------|--------------|-------|
| precuneus cortex                  | -0.031 | 0.077 | -0.344       | 0.005 | 0.023  | 0.720        | -0.081       | 0.316 | 0.040  | 0.374 | -0.213       | 0.174 |
| rostral anterior cingulate cortex | -0.017 | 0.076 | <b>0.108</b> | 0.411 | 0.109  | 0.084        | -0.196       | 0.022 | -0.027 | 0.649 | -0.014       | 0.942 |
| rostral middle frontal gyrus      | -0.165 | 0.077 | <b>0.057</b> | 0.640 | 0.030  | 0.641        | -0.017       | 0.828 | 0.032  | 0.742 | -0.302       | 0.044 |
| superior frontal gyrus            | -0.148 | 0.078 | -0.049       | 0.711 | 0.123  | 0.057        | -0.062       | 0.474 | -0.020 | 0.786 | -0.219       | 0.124 |
| superior parietal cortex          | -0.140 | 0.075 | -0.418       | 0.001 | -0.007 | 0.912        | <b>0.043</b> | 0.607 | 0.044  | 0.338 | 0.156        | 0.306 |
| superior temporal gyrus           | -0.052 | 0.075 | -0.104       | 0.484 | 0.066  | 0.294        | -0.063       | 0.511 | 0.026  | 0.739 | -0.181       | 0.297 |
| supramarginal gyrus               | -0.053 | 0.077 | -0.288       | 0.039 | 0.021  | 0.735        | 0.014        | 0.870 | -0.010 | 0.796 | <b>0.015</b> | 0.894 |
| frontal pole                      | -0.086 | 0.082 | <b>0.016</b> | 0.905 | 0.032  | 0.647        | -0.174       | 0.054 | -0.122 | 0.184 | <b>0.253</b> | 0.122 |
| temporal pole                     | 0.021  | 0.079 | -0.212       | 0.112 | -0.135 | <b>0.042</b> | -0.188       | 0.035 | 0.025  | 0.778 | -0.028       | 0.841 |
| transverse temporal cortex        | -0.018 | 0.074 | -0.221       | 0.111 | 0.035  | 0.580        | -0.103       | 0.265 | -0.007 | 0.938 | -0.024       | 0.846 |
| insula                            | 0.018  | 0.071 | -0.078       | 0.582 | 0.004  | 0.943        | -0.217       | 0.014 | -0.054 | 0.394 | -0.003       | 0.977 |
| average thickness                 | -0.141 | 0.073 | -0.242       | 0.064 | 0.014  | 0.823        | -0.059       | 0.500 | -0.241 | 0.075 | -0.083       | 0.634 |

Significant results, uncorrected for multiple comparisons are indicated in **bold**. Results where the direct of effect is different between 1.5 and 3 Tesla are indicated in **red**.

A negative Effect size indicates a smaller volume of region x in patient group y versus healthy controls; a positive Effect size indicates a larger volume of region x in patient group y versus healthy controls.

**Supplementary Table S81:** mega-analytic results for cortical surface area comparing adolescent ADHD, ASD and OCD patients to healthy control subjects, split by samples using a 1.5 Tesla and 3 Tesla scanner.

| ROI                              | OCD vs HC<br>ADHD vs HC |              | ASD vs HC   |       |             |              |             |       | ASD vs HC   |       |             |       |
|----------------------------------|-------------------------|--------------|-------------|-------|-------------|--------------|-------------|-------|-------------|-------|-------------|-------|
|                                  | ASD vs HC               |              | Effect size | P-    | Effect size | P-           | Effect size | P-    | Effect size | P-    | Effect size | P-    |
|                                  | (3T)                    | value        | (1.5T)      | value | (3T)        | value        | (1.5 T)     | value | (3T)        | value | (1.5 T)     | value |
| banks superior temporal sulcus   | -0.004                  | 0.963        | -0.028      | 0.842 | -0.105      | 0.139        | -0.088      | 0.331 | 0.031       | 0.723 | -0.228      | 0.186 |
| caudal anterior cingulate cortex | -0.087                  | 0.306        | -0.018      | 0.893 | -0.105      | 0.132        | -0.159      | 0.077 | -0.004      | 0.953 | 0.042       | 0.808 |
| caudal middle frontal gyrus      | 0.006                   | 0.946        | -0.059      | 0.662 | -0.132      | 0.056        | -0.273      | 0.002 | 0.003       | 0.971 | -0.062      | 0.810 |
| cuneus cortex                    | -0.042                  | 0.613        | -0.085      | 0.524 | -0.110      | 0.112        | -0.222      | 0.011 | 0.043       | 0.642 | 0.053       | 0.745 |
| entorhinal cortex                | 0.088                   | 0.319        | -0.125      | 0.406 | -0.037      | 0.608        | -0.039      | 0.667 | 0.078       | 0.365 | 0.075       | 0.780 |
| fusiform gyrus                   | 0.021                   | 0.796        | -0.169      | 0.185 | -0.103      | 0.134        | -0.220      | 0.009 | -0.001      | 0.995 | -0.201      | 0.308 |
| inferior parietal cortex         | -0.061                  | 0.468        | -0.112      | 0.400 | -0.123      | 0.072        | -0.137      | 0.110 | 0.073       | 0.386 | -0.194      | 0.331 |
| inferior temporal gyrus          | 0.062                   | 0.442        | -0.062      | 0.640 | -0.128      | 0.058        | -0.087      | 0.322 | 0.027       | 0.774 | -0.265      | 0.367 |
| isthmus cingulate cortex         | 0.060                   | 0.472        | 0.137       | 0.297 | -0.202      | <b>0.004</b> | -0.073      | 0.402 | 0.047       | 0.560 | 0.021       | 0.887 |
| lateral occipital cortex         | 0.007                   | 0.929        | 0.004       | 0.976 | -0.109      | 0.099        | -0.252      | 0.003 | 0.063       | 0.506 | 0.029       | 0.927 |
| lateral orbitofrontal cortex     | -0.063                  | 0.429        | -0.163      | 0.188 | -0.114      | 0.091        | -0.042      | 0.608 | -0.025      | 0.806 | 0.080       | 0.799 |
| lingual gyrus                    | 0.006                   | 0.941        | 0.081       | 0.547 | -0.074      | 0.292        | -0.165      | 0.066 | 0.001       | 0.991 | -0.109      | 0.576 |
| medial orbitofrontal cortex      | -0.156                  | <b>0.058</b> | -0.301      | 0.019 | -0.077      | 0.259        | -0.126      | 0.135 | 0.019       | 0.838 | -0.159      | 0.378 |
| middle temporal gyrus            | -0.007                  | 0.934        | -0.124      | 0.344 | -0.101      | 0.138        | -0.162      | 0.060 | 0.032       | 0.737 | -0.114      | 0.649 |
| parahippocampal gyrus            | -0.013                  | 0.876        | 0.040       | 0.759 | -0.013      | 0.855        | -0.141      | 0.109 | 0.095       | 0.234 | -0.114      | 0.573 |
| paracentral lobule               | -0.133                  | 0.104        | -0.193      | 0.160 | -0.056      | 0.415        | -0.119      | 0.187 | 0.067       | 0.348 | 0.076       | 0.692 |
| pars opercularis                 | -0.008                  | 0.926        | 0.053       | 0.704 | -0.139      | <b>0.047</b> | -0.229      | 0.011 | 0.023       | 0.761 | -0.172      | 0.250 |
| pars orbitalis                   | -0.008                  | 0.920        | -0.221      | 0.087 | -0.073      | 0.285        | -0.047      | 0.582 | 0.069       | 0.395 | 0.027       | 0.897 |
| pars triangularis                | -0.022                  | 0.793        | -0.121      | 0.360 | -0.110      | 0.116        | -0.211      | 0.016 | 0.016       | 0.807 | -0.139      | 0.640 |
| pericalcarine cortex             | -0.002                  | 0.981        | 0.015       | 0.915 | -0.129      | 0.067        | -0.263      | 0.005 | -0.039      | 0.624 | -0.263      | 0.227 |
| postcentral gyrus                | -0.011                  | 0.891        | -0.117      | 0.381 | -0.112      | 0.101        | -0.038      | 0.655 | 0.031       | 0.746 | -0.271      | 0.057 |
| posterior cingulate cortex       | -0.175                  | <b>0.033</b> | -0.223      | 0.082 | -0.156      | <b>0.023</b> | -0.216      | 0.011 | -0.025      | 0.775 | -0.040      | 0.809 |

|                                          |        |       |               |       |        |              |              |       |        |       |               |       |
|------------------------------------------|--------|-------|---------------|-------|--------|--------------|--------------|-------|--------|-------|---------------|-------|
| <b>precentral gyrus</b>                  | 0.003  | 0.967 | 0.097         | 0.455 | -0.139 | <b>0.039</b> | -0.103       | 0.219 | 0.049  | 0.594 | 0.022         | 0.908 |
| <b>precuneus cortex</b>                  | 0.003  | 0.968 | 0.076         | 0.552 | -0.121 | 0.072        | -0.158       | 0.061 | 0.083  | 0.376 | <b>-0.171</b> | 0.379 |
| <b>rostral anterior cingulate cortex</b> | -0.082 | 0.326 | <b>0.034</b>  | 0.796 | -0.116 | 0.094        | -0.187       | 0.031 | 0.015  | 0.872 | <b>-0.017</b> | 0.915 |
| <b>rostral middle frontal gyrus</b>      | -0.086 | 0.283 | -0.143        | 0.272 | -0.143 | <b>0.035</b> | -0.117       | 0.164 | 0.027  | 0.759 | <b>-0.065</b> | 0.744 |
| <b>superior frontal gyrus</b>            | -0.037 | 0.653 | -0.168        | 0.188 | -0.197 | <b>0.004</b> | -0.144       | 0.085 | 0.053  | 0.559 | <b>-0.181</b> | 0.448 |
| <b>superior parietal cortex</b>          | -0.002 | 0.983 | <b>0.035</b>  | 0.792 | -0.162 | <b>0.018</b> | -0.248       | 0.005 | 0.033  | 0.686 | <b>-0.085</b> | 0.555 |
| <b>superior temporal gyrus</b>           | -0.027 | 0.744 | <b>0.038</b>  | 0.779 | -0.120 | 0.085        | -0.047       | 0.590 | 0.043  | 0.626 | <b>-0.096</b> | 0.617 |
| <b>supramarginal gyrus</b>               | 0.066  | 0.428 | 0.015         | 0.911 | -0.144 | <b>0.035</b> | -0.133       | 0.121 | -0.036 | 0.631 | -0.070        | 0.790 |
| <b>frontal pole</b>                      | -0.023 | 0.785 | <b>0.299</b>  | 0.028 | -0.156 | <b>0.025</b> | -0.036       | 0.695 | 0.087  | 0.292 | 0.190         | 0.193 |
| <b>temporal pole</b>                     | 0.056  | 0.501 | <b>-0.081</b> | 0.556 | -0.105 | 0.134        | <b>0.025</b> | 0.788 | -0.007 | 0.908 | <b>0.057</b>  | 0.711 |
| <b>transverse temporal cortex</b>        | 0.007  | 0.929 | 0.169         | 0.206 | -0.082 | 0.240        | <b>0.020</b> | 0.825 | -0.015 | 0.870 | <b>0.130</b>  | 0.476 |
| <b>insula</b>                            | -0.051 | 0.520 | -0.155        | 0.250 | -0.113 | 0.088        | -0.037       | 0.662 | 0.029  | 0.770 | 0.046         | 0.895 |
| <b>average surface area</b>              | -0.022 | 0.773 | -0.030        | 0.803 | -0.156 | <b>0.017</b> | -0.178       | 0.027 | 0.032  | 0.734 | <b>-0.132</b> | 0.586 |

Significant results, uncorrected for multiple comparisons are indicated in **bold**. Results where the direct of effect is different between 1.5 and 3 Tesla are indicated in **red**.

A negative Effect size indicates a smaller volume of region x in patient group y versus healthy controls; a positive Effect size indicates a larger volume of region x in patient group y versus healthy controls.

**Supplementary Table S82:** mega-analytic results for each subcortical structure comparing adult ADHD, ASD and OCD patients to healthy control subjects, split by samples using a 1.5 Tesla and 3 Tesla scanner.

| ROI         | OCD vs HC        |              |                    |         | ADHD vs HC       |         |                    |         | ASD vs HC        |         |                    |         |
|-------------|------------------|--------------|--------------------|---------|------------------|---------|--------------------|---------|------------------|---------|--------------------|---------|
|             | Effect size (3T) | P-value      | Effect size (1.5T) | P-value | Effect size (3T) | P-value | Effect size (1.5T) | P-value | Effect size (3T) | P-value | Effect size (1.5T) | P-value |
| ICV         | -0.004           | 0.909        | -0.019             | 0.548   | -0.055           | 0.372   | 0.010              | 0.816   | 0.033            | 0.682   | 0.020              | 0.944   |
| thalamus    | -0.038           | 0.288        | -0.100             | 0.009   | -0.113           | 0.062   | 0.083              | 0.125   | 0.002            | 0.982   | 0.338              | 0.205   |
| caudate     | -0.010           | 0.812        | 0.008              | 0.845   | -0.049           | 0.451   | 0.014              | 0.817   | 0.038            | 0.655   | 0.024              | 0.907   |
| putamen     | 0.045            | 0.207        | -0.073             | 0.044   | -0.089           | 0.127   | 0.041              | 0.417   | 0.046            | 0.688   | 0.172              | 0.463   |
| pallidum    | 0.107            | <b>0.004</b> | 0.083              | 0.041   | -0.005           | 0.930   | 0.076              | 0.179   | 0.007            | 0.950   | 0.263              | 0.329   |
| hippocampus | -0.015           | 0.699        | -0.186             | 0.000   | -0.019           | 0.767   | -0.006             | 0.926   | -0.044           | 0.577   | 0.115              | 0.389   |
| amygdala    | -0.025           | 0.492        | -0.114             | 0.004   | -0.099           | 0.113   | 0.026              | 0.655   | -0.026           | 0.789   | -0.281             | 0.241   |
| accumbens   | 0.000            | 1.000        | -0.078             | 0.023   | -0.121           | 0.038   | 0.003              | 0.948   | -0.048           | 0.654   | 0.113              | 0.564   |

Significant results, uncorrected for multiple comparisons are indicated in **bold**. Results where the direct of effect is different between 1.5 and 3 Tesla are indicated in **red**.

A negative Effect size indicates a smaller volume of region x in patient group y versus healthy controls; a positive Effect size indicates a larger volume of region x in patient group y versus healthy controls.
